# Supplementary material for: Dual species transcript profiling during the interaction between banana (Musa acuminata) and the fungal pathogen Fusarium oxysporum f. sp. cubense
Source: BMC Genomics. 2019 Jun 24;20:519. doi: 10.1186/s12864-019-5902-z (PMC6591919; doi:10.1186/s12864-019-5902-z)
Supplement: Supplementary file 19 — Table S10. The expression levels of all banana transcripts in our research. (XLS 25512 kb) [file 12864_2019_5902_MOESM19_ESM.xls]

## Sheet: Sheet1
Additional file 19: Table S10. The expression levels of all banana transcripts in our research.
Transcript_id	Gene_id	Official_Symbol	Gene_type	NK27h1	NK27h2	NK27h3	NKCK27h1	NKCK27h2	NKCK27h3	BX27h1	BX27h2	BX27h3	BXCK27h1	BXCK27h2	BXCK27h3	NK51h1	NK51h2	NK51h3	NKCK51h1	NKCK51h2	NKCK51h3	BXCK51h1	BXCK51h2	BXCK51h3	BX51h1	BX51h2	BX51h3
Ma05_t02200.1	Ma05_g02200	-//-	mRNA	0	0.251978	0.121183	0.2252	0.131482	0.143088	0	0	0.0957714	0.387782	0.391993	0.972612	0.325554	0.123176	0	0	0.545322	0.397763	0	0.72767	0.486785	1.29566	0	0.235269
Ma07_t27130.2	Ma07_g27130	sp|P46512|CAH1_FLALI Carbonic anhydrase 1 OS=Flaveria linearis PE=2 SV=1//5.14408e-97	mRNA	52.0836	101.959	71.4879	126.719	85.0463	68.3518	88.5782	69.3091	70.8722	159.379	113.854	127.216	53.136	46.7453	38.2032	128.353	116.568	93.5002	115.665	136.495	114.13	94.8964	56.3078	112.767
Ma04_t13150.1	Ma04_g13150	sp|Q84W65|SUFE1_ARATH SufE-like protein 1, chloroplastic/mitochondrial OS=Arabidopsis thaliana GN=SUFE1 PE=1 SV=2//5.89981e-67	mRNA	0.279324	3.26195e-06	0.756196	5.0515e-06	0.13755	0.329527	0.162187	0.122059	0.249659	4.693e-06	0.173439	7.24475e-06	0.339632	0.180486	9.93381e-06	0.298929	9.12634e-07	0.107892	0.41306	0.452717	0.539076	0.13925	5.61403e-06	0.299906
Ma11_t12050.1	Ma11_g12050	sp|Q5NDE4|PMGT2_TAKRU Protein O-linked-mannose beta-1,4-N-acetylglucosaminyltransferase 2 OS=Takifugu rubripes GN=pomgnt2 PE=2 SV=1//3.24593e-07	mRNA	244.33	177.821	165.122	73.1934	83.4065	46.8459	158.652	237.468	111.22	191.172	208.527	72.3271	88.5234	118.29	142.058	75.0649	79.5429	71.7345	57.4462	66.4226	40.0424	63.2058	169.63	85.5969
Ma09_t28330.1	Ma09_g28330	-//-	mRNA	0	0	0	0	0	0	0	0	0	0	0	0	0	0	0	0	0	0	0	0	0	0	0	0
Ma05_t08920.2	Ma05_g08920	-//-	mRNA	2.80687	3.61041	2.33745	0.903195	0.834067	1.58928	2.01301	0.92295	0.820544	1.38046	2.18918	2.12393	3.57178	2.78248	2.73111	1.22855	0.553518	1.60491	2.29721	2.36153	2.02709	2.76473	0.991358	2.04331
Ma04_t13150.3	Ma04_g13150	sp|Q84W65|SUFE1_ARATH SufE-like protein 1, chloroplastic/mitochondrial OS=Arabidopsis thaliana GN=SUFE1 PE=1 SV=2//5.89981e-67	mRNA	0.463591	0.0978246	5.12233e-06	0.304335	0.299703	0.609891	0.55953	0.716083	0.345146	0.760464	0.826554	0.118249	0.557692	0.498882	0.788048	1.28239e-06	0.648323	0.338376	0.427278	0.334089	0.492666	0.58125	0.622241	0.155845
Ma08_t10590.1	Ma08_g10590	-//-	mRNA	0	0	0	0	0	0	0	0	0	0	0	0	0	0	0	0	0	0	0	0	0	0	0	0
Ma09_t09940.1	Ma09_g09940	-//-	mRNA	1.94565	2.07598	2.54901	2.79011	2.22092	1.85415	2.03078	0.315124	1.97483	2.20836	2.41728	2.76879	1.87909	1.54835	1.81985	2.33058	2.27405	2.65817	3.11646	3.1609	4.33654	2.88051	0.997819	3.25222
Ma10_t20880.1	Ma10_g20880	-//-	mRNA	0.312188	0.463166	0	0	0	0	0	0	0	0	0	0	0	0	0	0	0	0	0	0	0	0	0	0
Ma06_t25360.1	Ma06_g25360	sp|P92519|M810_ARATH Uncharacterized mitochondrial protein AtMg00810 OS=Arabidopsis thaliana GN=AtMg00810 PE=4 SV=1//3.12658e-32	mRNA	0.0214771	0	0	0	0.0578997	0.0303382	0	0.049483	0	0	0	0	0	0.0268681	0	0.0375989	0	0	0	0.0331554	0	0.0248838	0	0
Ma04_t35770.1	Ma04_g35770	sp|O22781|SUVH2_ARATH Histone-lysine N-methyltransferase family member SUVH2 OS=Arabidopsis thaliana GN=SUVH2 PE=1 SV=1//0	mRNA	5.24118	3.57662	5.23575	3.62253	5.30709	4.44067	4.05801	5.97401	3.04288	4.01136	4.80098	3.88168	4.12783	4.31041	3.9841	3.89725	5.36097	3.40791	3.52846	3.30165	2.81335	3.12988	4.89384	3.70914
Ma06_t07950.1	Ma06_g07950	sp|P46032|PTR2_ARATH Protein NRT1/ PTR FAMILY 8.3 OS=Arabidopsis thaliana GN=NPF8.3 PE=1 SV=1//0	mRNA	0.0203587	0	0	0	0	0.0574568	0	0	0	0	0	0	0	0	0	0	0	0	0	0	0	0	0	0
Ma03_t19300.2	Ma03_g19300	sp|A2BIJ3|BSDC1_DANRE BSD domain-containing protein 1 OS=Danio rerio GN=bsdc1 PE=1 SV=1//1.01126e-12	mRNA	2.73965	3.42016	6.6199	2.10595	6.08491	5.74736	3.3567	3.22145	3.34307	2.25382	2.56786	5.20229	3.0132	3.89943	3.63877	6.33922	2.77394	2.25215	5.62305	8.18016	3.31526	4.31533	4.24286	4.22435
Ma02_t18500.1	Ma02_g18500	sp|Q9FPR3|EDR1_ARATH Serine/threonine-protein kinase EDR1 OS=Arabidopsis thaliana GN=EDR1 PE=1 SV=1//5.24656e-54	mRNA	17.3921	13.9935	14.6551	7.70395	8.49191	9.84151	9.15527	37.7668	12.8176	9.80844	11.2398	8.03435	10.6027	13.8967	14.8497	17.3299	23.478	10.8254	7.89778	8.15292	5.57879	7.0525	25.5009	8.97602
Ma02_t18500.2	Ma02_g18500	sp|Q9FPR3|EDR1_ARATH Serine/threonine-protein kinase EDR1 OS=Arabidopsis thaliana GN=EDR1 PE=1 SV=1//5.24656e-54	mRNA	1.54369	1.47196	0.981494	1.27614	2.26107	0.711658	1.3542	4.02222	1.67819	1.5449	1.43494	0.000420571	0.822112	1.29765	0.848867	0.648959	3.17043	1.78107	0.872812	0.773598	1.06808	0.264963	3.05397	2.86407
Ma03_t19300.1	Ma03_g19300	sp|A2BIJ3|BSDC1_DANRE BSD domain-containing protein 1 OS=Danio rerio GN=bsdc1 PE=1 SV=1//1.01126e-12	mRNA	2.91784	3.1288	0.0152859	3.53332	0.000514228	1.61007	0.621012	1.99557	2.99743	3.11215	2.80762	2.14451	5.32362	3.09976	3.97875	3.38141	3.59441	3.8554	2.01869	0.000129144	3.09054	2.49556	2.04658	3.755
Ma11_t15720.2	Ma11_g15720	sp|Q8RWY6|CLASP_ARATH CLIP-associated protein OS=Arabidopsis thaliana GN=CLASP PE=1 SV=1//0	mRNA	0.778572	0.530158	2.27699e-05	0.284665	1.54238	2.17032	0.528502	0.455474	1.23304	1.17739	0.52047	1.23339	2.70942	2.29138	3.70437	1.65493	0.728913	1.07497	0.660325	0.519103	0.850476	1.19352	1.75123	0.958578
Ma11_t15720.1	Ma11_g15720	sp|Q8RWY6|CLASP_ARATH CLIP-associated protein OS=Arabidopsis thaliana GN=CLASP PE=1 SV=1//0	mRNA	30.0423	31.7549	29.2617	41.9581	37.2682	42.6786	30.1594	29.0454	32.3437	32.8373	31.6428	41.1823	39.4069	36.5717	32.0549	42.2183	42.7728	38.8628	39.5615	39.1489	40.1831	43.3984	28.9615	36.7222
Ma02_t13350.1	Ma02_g13350	sp|F4JRF4|MUTYH_ARATH A/G-specific adenine DNA glycosylase OS=Arabidopsis thaliana GN=MYH PE=3 SV=1//1.03543e-146	mRNA	0.997286	1.28275	1.31602	2.55136	1.4941	1.87953	1.46562	1.6341	1.41729	1.52694	1.62463	1.45518	1.17251	1.2481	1.0761	1.93989	2.08749	1.72865	1.58437	1.09479	1.42683	1.61747	1.0379	1.7529
Ma07_t20210.1	Ma07_g20210	sp|Q9ZUZ3|SAU32_ARATH Auxin-responsive protein SAUR32 OS=Arabidopsis thaliana GN=SAUR32 PE=2 SV=1//3.47639e-07	mRNA	22.5061	10.8279	9.61353	3.55656	9.54409	3.83729	9.56226	21.8321	6.11184	7.55852	15.0953	0.950282	3.92349	8.15992	10.995	7.96812	21.8152	10.1517	4.84414	3.22128	3.61932	5.45802	14.9553	7.1614
Ma01_t11600.1	Ma01_g11600	sp|Q6Z5N4|ODPA1_ORYSJ Pyruvate dehydrogenase E1 component subunit alpha-1, mitochondrial OS=Oryza sativa subsp. japonica GN=Os02g0739600 PE=2 SV=1//0	mRNA	33.1523	26.4457	31.28	26.7743	23.8249	21.5755	24.7681	16.962	23.1547	21.4561	29.1917	18.4143	19.7044	25.1223	26.8338	15.6652	11.8674	20.1734	19.6677	17.6625	19.2944	21.4885	15.7874	18.481
Ma06_t24610.1	Ma06_g24610	-//-	mRNA	23.0487	22.4712	19.9628	10.4655	11.3088	10.931	16.2569	32.3527	18.639	14.0763	14.2324	9.92469	12.7225	16.1528	19.6451	11.9707	12.9498	10.3099	8.25647	8.1831	8.77432	11.0298	21.2808	13.9591
Ma09_t20420.1	Ma09_g20420	sp|Q8LE94|RING3_ARATH E3 ubiquitin-protein ligase At3g02290 OS=Arabidopsis thaliana GN=At3g02290 PE=2 SV=1//4.76127e-09	mRNA	1.116	1.80881	1.18744	1.16805	1.35438	1.92478	1.18086	3.03443	1.06489	1.50706	1.48478	1.7242	0.839696	1.4806	1.06088	1.52391	1.61721	1.23449	0.853485	1.24042	1.29032	0.698128	2.56966	1.20379
Ma06_t21460.1	Ma06_g21460	-//-	mRNA	0	0	0	0	0	0	0	0	0	0	0	0	0	0	0	0	0	0	0	0	0	0	0	0
Ma03_t17610.2	Ma03_g17610	sp|Q8L7S0|ULP2B_ARATH Probable ubiquitin-like-specific protease 2B OS=Arabidopsis thaliana GN=ULP2B PE=1 SV=3//4.0089e-136	mRNA	9.65678e-08	0.17476	2.86399e-24	7.97235e-31	2.24133e-24	3.9665e-34	1.15813e-25	1.22859e-27	8.2612e-10	2.33195e-51	3.02747e-23	5.60724e-27	0.574382	5.46088e-12	1.88066e-06	7.91995e-36	1.80486e-19	9.87572e-29	1.5448e-32	4.28156e-30	1.17843e-26	7.38557e-14	1.05102e-34	4.62669e-19
Ma03_t17610.3	Ma03_g17610	sp|Q8L7S0|ULP2B_ARATH Probable ubiquitin-like-specific protease 2B OS=Arabidopsis thaliana GN=ULP2B PE=1 SV=3//4.0089e-136	mRNA	0.000794605	0.00109915	0.000719386	0.000680597	0.000927946	0.000971767	0.00131685	0.00183656	0.000723833	0.0024306	0.00168392	0.000761014	0.000707181	0.000728105	0.000690842	0.00227813	0.00122874	0.000936306	7.61629e-07	0.000914803	0.000781374	0.00130317	7.48077e-07	0.00126504
Ma03_t17610.1	Ma03_g17610	sp|Q8L7S0|ULP2B_ARATH Probable ubiquitin-like-specific protease 2B OS=Arabidopsis thaliana GN=ULP2B PE=1 SV=3//4.0089e-136	mRNA	2.07757	1.31438	2.31179	3.27882	1.25062	1.5882	2.01796	4.14894	0.59964	3.20305	1.49138	1.80451	2.03505	2.56087	1.27077	2.60608	3.35214	2.47634	0.000663931	4.32425	3.92242	0.503761	0.00305038	1.12299
Ma03_t00020.1	Ma03_g00020	sp|Q9LZ82|BTR1_ARATH Protein BTR1 OS=Arabidopsis thaliana GN=BTR1 PE=1 SV=1//3.26635e-118	mRNA	22.6249	18.1531	19.577	15.7914	14.834	13.3206	19.46	15.773	17.2589	16.4153	19.0987	14.2212	20.6161	17.5237	16.9232	14.1625	13.2691	17.9658	13.2652	13.2434	15.7394	18.9754	18.0412	13.5308
Ma11_t06110.1	Ma11_g06110	sp|G5E8K5|ANK3_MOUSE Ankyrin-3 OS=Mus musculus GN=Ank3 PE=1 SV=1//2.48371e-07	mRNA	13.0061	16.2797	18.5316	21.7551	21.326	23.253	13.5641	10.1695	13.4299	13.7134	16.1015	18.7304	16.1862	17.4054	15.1328	24.0688	21.7038	25.1216	26.6248	24.3761	24.2086	15.0393	19.6279	13.5812
Ma03_t17610.4	Ma03_g17610	sp|Q8L7S0|ULP2B_ARATH Probable ubiquitin-like-specific protease 2B OS=Arabidopsis thaliana GN=ULP2B PE=1 SV=3//4.0089e-136	mRNA	10.9845	10.6769	10.0996	9.30061	8.58016	12.3866	8.31385	9.47019	13.0442	9.25564	8.17022	8.43683	9.24861	12.8567	14.3811	13.2633	9.71204	10.0411	9.67321	7.56426	6.76113	11.8805	11.4712	8.98669
Ma08_t16090.1	Ma08_g16090	sp|Q70II3|EF110_ARATH Ethylene-responsive transcription factor ERF110 OS=Arabidopsis thaliana GN=ERF110 PE=2 SV=2//1.45593e-14	mRNA	0.29695	0.716606	0.424155	0.0993574	0.115429	0.0611174	0.897091	0	0.172217	0.350104	0.405298	0	0.0495581	0.214819	0.268284	0.222803	0.245653	0.0599965	0.0703443	0.130922	0	0.293798	0.0825968	0.102777
Ma10_t11830.1	Ma10_g11830	-//-	mRNA	34.0906	44.2656	47.8504	41.1092	45.8696	47.4716	36.7802	18.6904	30.1857	32.2948	36.0942	42.4387	43.5196	34.867	40.7888	33.4956	26.6894	42.4889	54.1432	49.9878	46.2428	43.7589	24.3804	54.1276
Ma06_t32230.1	Ma06_g32230	sp|Q9FLJ2|NC100_ARATH NAC domain-containing protein 100 OS=Arabidopsis thaliana GN=NAC100 PE=2 SV=1//6.66632e-92	mRNA	0.121547	2.15856	0.301984	4.74852	0.986908	1.25522	2.41077	0	2.03567	2.67789	1.1989	5.32081	3.59898	0.955163	0.886148	0.63837	1.18845	1.50662	2.06914	2.34508	3.34641	4.95624	0	4.16954
Ma04_t26910.1	Ma04_g26910	sp|O22173|PABP4_ARATH Polyadenylate-binding protein 4 OS=Arabidopsis thaliana GN=PAB4 PE=1 SV=1//0	mRNA	54.3225	46.108	53.3178	47.2158	45.1961	45.9126	59.2135	25.9867	52.7308	44.2765	61.8692	48.3337	47.6322	46.8773	49.5919	34.5037	34.7405	54.6782	45.5154	42.8894	48.1334	47.4032	29.939	42.9692
Ma00_t03410.1	Ma00_g03410	sp|Q505I4|CO040_RAT UPF0235 protein C15orf40 homolog OS=Rattus norvegicus PE=2 SV=1//5.42469e-16	mRNA	18.1332	28.2814	33.1449	29.6543	26.7784	20.5052	29.319	19.3306	20.3682	27.1926	27.8513	29.8162	18.677	13.8328	15.508	21.3459	20.5557	36.5056	29.8378	26.5276	26.7518	23.7508	24.9706	22.3099
Ma04_t03190.1	Ma04_g03190	-//-	mRNA	0	0	0	0	0	0	0	0	0	0	0	0	0	0	0	0	0	0	0	0	0	0	0	5.96838
Ma06_t36240.1	Ma06_g36240	-//-	mRNA	0	0	0	0	0	0	0	0	0	0	0	0	0	0	0	0	0	0	0	0	0	0	0	0
Ma02_t24930.1	Ma02_g24930	-//-	mRNA	0	0	0	0	0	0	0	0	0	0	0	0	0	0	0	0	0	0	0	0	0	0	0	0
Ma08_t07810.1	Ma08_g07810	sp|Q6ICX4|PTBP3_ARATH Polypyrimidine tract-binding protein homolog 3 OS=Arabidopsis thaliana GN=At1g43190 PE=2 SV=1//0	mRNA	29.3427	11.1333	14.1663	9.39483	4.97118	5.1474	17.0466	10.1123	12.7604	14.0493	14.6759	8.05901	20.6158	12.4089	20.659	10.1504	11.4537	7.69536	9.37804	8.38036	12.1539	16.6181	9.76733	10.1611
Ma05_t30290.1	Ma05_g30290	sp|Q9LUH2|ALF5_ARATH MATE efflux family protein ALF5 OS=Arabidopsis thaliana GN=ALF5 PE=2 SV=1//4.84255e-38	mRNA	0.0960673	0.247362	0.0297395	0.111785	0.0648191	0	0.0952914	0.276768	0.146275	0.959593	0.0652398	0.247371	0.0282202	0.0300885	0	0.0420452	0.174001	0.136208	1.11777	1.03808	0.441567	0.361579	0.0937118	0.259292
Ma08_t24650.1	Ma08_g24650	-//-	mRNA	1.059	1.61838	0.576522	1.24174	0.627433	1.06504	0.365086	0.425762	1.54205	0.696436	0.880657	1.00785	0.483556	0.642523	0.438374	0.806093	1.19961	0.520698	0.915778	1.20777	0.901705	0.637354	0.537684	0.838269
Ma02_t16350.1	Ma02_g16350	-//-	mRNA	0	0	0	0	0	0	0	0	0	160.484	153.408	0	0	0	0	0	0	114.808	0	146.082	0	0	0	0
Ma03_t01160.1	Ma03_g01160	sp|Q5NDE3|PMGT2_TETNG Protein O-linked-mannose beta-1,4-N-acetylglucosaminyltransferase 2 OS=Tetraodon nigroviridis GN=pomgnt2 PE=2 SV=1//2.45217e-08	mRNA	5.70695	16.6192	12.8121	22.5088	10.934	12.2007	19.0062	4.6983	14.4331	15.5073	14.9098	23.8578	15.4751	9.60345	11.3187	11.6753	12.4566	16.3171	17.6929	17.4683	24.1444	24.702	3.69275	26.0476
Ma10_t06790.2	Ma10_g06790	sp|Q9FHK4|Y5519_ARATH Uncharacterized protein At5g05190 OS=Arabidopsis thaliana GN=Y-1 PE=1 SV=1//2.17231e-06	mRNA	1.91101e-05	0.640203	1.77395	2.41862	1.59007	1.82991	1.44411	0.353488	1.85893e-05	2.16951	4.69622e-05	2.3774	0.712021	0.470388	0.912908	0.52365	1.14395	1.25619	1.53108	0.484048	1.61522	0.53409	0.649714	1.61956
Ma06_t31540.1	Ma06_g31540	sp|Q9FUM9|HMT2_MAIZE Homocysteine S-methyltransferase 2 OS=Zea mays GN=HMT-2 PE=2 SV=1//5.18493e-161	mRNA	91.4856	57.2628	75.7045	33.4042	69.3094	56.9398	52.7623	194.829	36.0365	57.8133	74.1365	28.2691	38.8191	75.0322	66.5526	66.9807	62.1951	60.9179	38.6127	38.5285	20.6754	29.1425	168.834	42.0712
Ma06_t37270.1	Ma06_g37270	-//-	mRNA	0	1.22987	2.06757	2.15607	1.59266	3.71423	0.568423	4.0915	2.19364	0.586592	1.23801	1.94951	0.9593	0.910039	0.547323	0	2.17482	0.896364	0.350847	0.665286	0.540712	2.66578	3.30959	0.287763
Ma08_t26060.1	Ma08_g26060	sp|F4K657|BL1S2_ARATH Biogenesis of lysosome-related organelles complex 1 subunit 2 OS=Arabidopsis thaliana GN=BLOS2 PE=1 SV=1//7.06334e-40	mRNA	3.62324	2.65412	6.26617	3.34453	5.0373	5.33381	5.85615	11.5871	5.5135	3.72186	4.50856	5.7157	2.08485	3.18376	2.30702	3.96487	3.13985	3.56377	2.08986	2.51359	2.68823	2.48794	7.01792	3.15358
Ma02_t17500.1	Ma02_g17500	sp|Q9SF32|IQD1_ARATH Protein IQ-DOMAIN 1 OS=Arabidopsis thaliana GN=IQD1 PE=1 SV=1//8.09201e-13	mRNA	0.183474	0.810762	0.519869	0.335744	0.531064	0.409077	0.346625	0.241712	0.212845	0.685993	0.249342	1.45108	0.400096	0.164388	0.271864	0.22943	0.265824	0.705876	1.17597	1.45652	1.99528	1.18335	0.204495	1.00731
Ma08_t01900.1	Ma08_g01900	sp|Q0WT19|IP5P8_ARATH Type I inositol polyphosphate 5-phosphatase 8 OS=Arabidopsis thaliana GN=IP5P8 PE=2 SV=1//1.15261e-142	mRNA	0.340361	0.300845	0.236746	0.222566	0.17203	0.0300436	0.365783	0.343073	0.107971	0.439736	0.375332	0.109552	0.175121	0.0798275	0.175663	0.111722	0.400763	0.181034	0	0.164199	0.167742	0.147887	0.124543	0.0764438
Ma04_t39220.1	Ma04_g39220	sp|Q9FLJ8|Y5613_ARATH Probable receptor-like protein kinase At5g61350 OS=Arabidopsis thaliana GN=At5g61350 PE=2 SV=1//0	mRNA	0.0581292	0.0446256	0	0.148172	0.140429	0.211549	0.230741	0.160499	0.0236052	0.272601	0.283296	0.17961	0.0137142	0.0433908	0.023776	0.142467	0.134847	0.165114	0.329039	0.394921	0.229778	0.121444	0.20441	0.166264
Ma02_t19120.1	Ma02_g19120	-//-	mRNA	1.83691	1.63758	1.57506	1.20828	1.3512	1.48279	0.961162	1.32561	1.70902	0.895195	1.25219	0.837647	1.65632	2.9	2.28971	2.47891	1.60698	0.866469	1.33335	0.944933	1.2016	1.23777	2.53455	1.48019
Ma06_t12000.1	Ma06_g12000	sp|Q9L5W4|RL7_LIBAC 50S ribosomal protein L7/L12 OS=Liberibacter africanus subsp. capensis GN=rplL PE=3 SV=1//1.24963e-11	mRNA	1.3451	2.09522	3.02295	3.0974	2.517	1.77177	2.29769	1.28621	2.00692	2.1696	2.07214	4.38128	1.27935	1.12546	1.1255	0.969721	1.82948	2.6724	2.74231	3.17221	4.71055	2.90356	1.07412	2.05312
Ma06_t37260.1	Ma06_g37260	-//-	mRNA	0.246933	0.558263	0.306827	0.360022	0.167117	0.219934	0.204066	0.640869	0.532617	0.0850017	0.209998	0.0397414	0.289525	0.271743	0.257305	0.324225	0.178842	0.0874464	0	0.0952834	0	0.0714052	0.300874	0.297295
Ma04_t20270.1	Ma04_g20270	sp|Q8VZP6|GUX8_ARATH Putative glucuronosyltransferase PGSIP8 OS=Arabidopsis thaliana GN=PGSIP8 PE=2 SV=1//0	mRNA	8.33546	5.33835	15.3137	6.34764	5.79298	5.8819	7.0387	7.86246	11.4666	6.00799	4.77763	4.5358	9.06422	7.89123	9.51222	3.08379	5.26425	3.71067	5.73955	4.76621	5.6133	5.60014	8.154	7.449
Ma02_t01520.1	Ma02_g01520	sp|F4J424|RIC5_ARATH CRIB domain-containing protein RIC5 OS=Arabidopsis thaliana GN=RIC5 PE=1 SV=1//6.83385e-18	mRNA	0.0895034	0.21285	1.27583	1.69488e-06	8.40305e-05	0.326446	5.93414e-08	1.84911e-05	0.000114225	8.42796e-06	1.46177e-09	0.190134	0.0038076	9.21809e-13	0.359944	2.10517e-05	0.136884	0.716217	5.31653e-06	0.0253289	7.6195e-06	3.6574e-15	6.98811e-08	1.54981e-23
Ma02_t01520.2	Ma02_g01520	sp|F4J424|RIC5_ARATH CRIB domain-containing protein RIC5 OS=Arabidopsis thaliana GN=RIC5 PE=1 SV=1//6.83385e-18	mRNA	0.348723	0.488738	4.00422e-08	0.849753	0.844921	0.496499	0.802038	0.571912	0.944961	1.07491	1.10654	1.10069	1.02452	0.876191	0.391369	0.817104	0.829305	0.531468	0.338398	0.962715	0.459957	0.825115	0.567356	0.825036
Ma02_t01520.3	Ma02_g01520	sp|F4J424|RIC5_ARATH CRIB domain-containing protein RIC5 OS=Arabidopsis thaliana GN=RIC5 PE=1 SV=1//6.83385e-18	mRNA	0.524284	0.000128205	1.96536e-05	1.05288	1.20067e-10	4.92488e-06	0.000302995	5.05113e-14	0.214674	8.2468e-07	0.0293074	0.000372805	6.38441e-07	0.0646634	0.402263	0.14956	0.717916	3.23432e-05	0.50604	0.433284	0.868768	0.0176847	0.114245	0.725859
Ma02_t01520.4	Ma02_g01520	sp|F4J424|RIC5_ARATH CRIB domain-containing protein RIC5 OS=Arabidopsis thaliana GN=RIC5 PE=1 SV=1//6.83385e-18	mRNA	0.252338	0.517432	0.904476	0.693121	0.493534	4.20372e-06	0.861337	4.29193e-14	0.567659	0.776231	1.10178	0.563069	0.46005	0.549139	0.289276	0.317158	4.27499e-05	0.424109	0.410329	0.93437	0.438181	0.796099	0.645137	5.5476e-05
Ma02_t16890.1	Ma02_g16890	sp|Q69T58|ROC8_ORYSJ Homeobox-leucine zipper protein ROC8 OS=Oryza sativa subsp. japonica GN=ROC8 PE=2 SV=2//0	mRNA	0.852823	0.138067	0.464776	0.23758	0.579325	0.830431	0.314251	0.645732	0.60277	0.491396	0.160721	0.750496	0.382131	0.792014	0.584579	0.264576	1.15827	0.690005	0.844794	0.716755	1.20932	0.350884	0.906932	0.61727
Ma10_t16810.3	Ma10_g16810	-//-	mRNA	0.118194	4.28757e-06	6.70218e-09	5.54499e-06	1.15942e-05	0.425473	9.93679e-06	2.92689e-05	7.52631e-08	1.20418e-06	2.50225e-06	0.195195	1.0346e-08	0.140591	0.096201	0.893224	0.260982	2.19456e-05	4.97858e-05	4.285e-06	0.212575	7.27459e-16	0.365247	1.91384e-05
Ma02_t19640.1	Ma02_g19640	-//-	mRNA	1.97754e-06	1.46092	7.48045e-05	3.30707e-05	1.60248	0.628609	1.16496	3.19761e-05	8.12406e-06	3.97502e-05	0.472809	1.6148e-05	0.827084	9.32597e-06	0.166996	0.576431	2.14902e-05	0.000223184	1.98645e-05	2.29103e-05	1.7111	0.535299	1.91099e-05	1.62779e-05
Ma02_t19640.2	Ma02_g19640	-//-	mRNA	26.7764	18.7425	19.4398	12.9917	24.2474	26.1409	18.6714	16.8857	20.6352	16.9959	20.8462	21.5098	35.1656	24.9709	35.6342	28.6439	20.1023	16.459	19.9313	21.5043	13.1521	17.3727	29.9999	23.8893
Ma04_t16340.1	Ma04_g16340	sp|Q55CU8|RSC5_DICDI Random slug protein 5 OS=Dictyostelium discoideum GN=rsc5 PE=2 SV=1//1.51369e-19	mRNA	8.59425	7.8057	20.2438	7.74422	6.02559	4.95037	6.93351	4.6736	12.6192	4.57871	4.07772	3.20123	9.70811	14.6856	17.2816	5.53567	2.9366	3.98349	6.55605	4.88088	3.54638	6.47531	6.00886	5.65007
Ma08_t27550.2	Ma08_g27550	-//-	mRNA	4.89946	4.47425	2.55774	4.45251	5.61742	3.84535	3.33773	2.1318	4.5375	4.29733	4.54712	4.29538	5.91294	6.20745	3.70859	3.99125	3.91869	5.11	5.07613	4.0331	3.85665	6.91292	2.86241	3.65229
Ma08_t27550.1	Ma08_g27550	-//-	mRNA	6.78012e-05	2.23397	5.88908	0.766323	5.80225e-05	2.12631	0.987821	1.53344	1.14151	0.455611	0.636607	0.467877	1.26557	0.868459	2.54681	2.69345	1.18209	4.71956e-05	5.246e-05	0.57319	0.492128	4.3471e-05	2.64041	2.85455
Ma11_t13750.1	Ma11_g13750	sp|Q7DLR9|PSB4_ARATH Proteasome subunit beta type-4 OS=Arabidopsis thaliana GN=PBG1 PE=1 SV=2//2.29587e-130	mRNA	116.129	153.299	199.971	114.067	106.833	118.114	200.124	162.084	158.902	151.878	175.615	140.522	82.4906	115.166	105.244	85.4029	85.9303	114.53	108.249	97.5186	117.716	125.295	133.601	131.439
Ma02_t07990.1	Ma02_g07990	sp|F4IRR2|SAD2_ARATH Importin beta-like SAD2 OS=Arabidopsis thaliana GN=SAD2 PE=1 SV=1//0	mRNA	0.0791998	0.253121	0.243452	0.183419	0.119491	0.0968462	0.170299	0.250508	0.241216	0.0819419	0.174149	0.152946	0.210324	0.393745	0.19202	0.294628	0.229678	0.225017	0.0989138	0.0305733	0.104404	0.206895	0.36754	0.117878
Ma04_t32150.1	Ma04_g32150	sp|Q8W1Y3|KP1_ARATH Kinesin KP1 OS=Arabidopsis thaliana GN=KP1 PE=1 SV=2//0	mRNA	1.41067	1.4317	2.17419	1.91859	1.99171	1.47859	0.950408	1.60731	1.37154	1.13223	1.15161	1.66743	1.57768	1.97544	1.10352	0.781234	2.34694	0.63365	0.458181	1.64142	1.75043	1.99498	2.11466	0.974076
Ma04_t32150.2	Ma04_g32150	sp|Q8W1Y3|KP1_ARATH Kinesin KP1 OS=Arabidopsis thaliana GN=KP1 PE=1 SV=2//0	mRNA	1.7002	1.52438	0.000749689	1.38491	0.588266	0.808049	1.3797	2.2269	1.41429	1.48195	0.644429	1.06164	0.89354	0.922217	2.09596	2.09126	3.06228	1.68557	1.88385	0.517743	0.365242	0.560799	2.17533	1.17835
Ma04_t28210.1	Ma04_g28210	sp|O82197|VP321_ARATH Vacuolar protein sorting-associated protein 32 homolog 1 OS=Arabidopsis thaliana GN=VPS32.1 PE=1 SV=1//7.33802e-17	mRNA	2.25555	0.666947	2.18503e-05	0.482556	0.458433	1.90743	6.66876e-06	1.88528	1.4593	0.891006	1.43258	0.347702	2.57864	2.20843	2.68591	0.665249	0.464171	2.08052	1.56918	1.78277	1.81768	1.06489	1.844	1.12448
Ma06_t23930.1	Ma06_g23930	-//-	mRNA	0.527167	0.42115	0.253171	0.996614	0.606368	0.758153	0.375201	0.0936738	1.11124	0.557877	0.885117	0.730975	0.331809	1.28207	0.895925	0.993909	0.234845	0.45893	0.605337	0.563199	0.424165	0.655528	0.947662	0.392594
Ma04_t28210.2	Ma04_g28210	sp|O82197|VP321_ARATH Vacuolar protein sorting-associated protein 32 homolog 1 OS=Arabidopsis thaliana GN=VPS32.1 PE=1 SV=1//7.33802e-17	mRNA	7.52442	8.09042	5.96826	7.95879	7.47102	11.712	7.64198	10.0589	7.86546	7.53651	4.98735	8.07278	11.7457	11.8179	13.0163	10.5497	7.74096	5.87455	6.23791	5.76273	5.11782	8.51206	11.9625	7.01082
Ma08_t10510.1	Ma08_g10510	-//-	mRNA	61.6548	49.5251	51.8875	44.6843	42.3355	47.1009	52.6199	41.3829	61.0201	44.4472	50.0763	43.9777	62.1517	58.1307	62.3313	38.486	34.3689	42.8981	38.8647	34.5372	39.485	47.2313	41.5898	45.6285
Ma11_t14370.1	Ma11_g14370	-//-	mRNA	2.47218	1.60047	1.02561	2.34745	1.38368	3.17966	1.50019	0.896133	1.73539	0.774942	2.70157	1.22435	4.88477	1.83862	5.38723	2.33211	1.91405	2.37278	1.85668	2.92615	0.956849	1.92551	1.45823	1.49807
Ma05_t00100.1	Ma05_g00100	sp|O81635|ATK4_ARATH Kinesin-4 OS=Arabidopsis thaliana GN=ATK4 PE=1 SV=2//0	mRNA	1.16491	1.90908	1.50126	1.58796	1.15884	1.45661	0.932345	1.03724	0.925137	1.08866	0.838885	1.49974	1.29751	1.71592	1.44742	0.822303	1.1034	2.12207	0.860468	1.27655	1.75878	1.189	0.954588	0.894632
Ma05_t20050.1	Ma05_g20050	sp|Q9HSF6|RNH_HALSA Ribonuclease HI OS=Halobacterium salinarum (strain ATCC 700922 / JCM 11081 / NRC-1) GN=rnhA PE=1 SV=1//2.30206e-12	mRNA	0	0	0.0346701	0	0	0	0	0.0644384	0	0	0	0	0	0	0	0	0	0	0.0464235	0	0	0.0323384	0	0
Ma02_t02870.1	Ma02_g02870	-//-	mRNA	1.58699	1.00475	1.00841	1.06443	1.3271	1.0615	1.16069	1.24683	0.822532	1.62682	0.873617	0.999914	1.22616	1.06341	1.12912	1.06404	1.27148	0.764976	0.224216	1.25072	0.796109	1.05396	1.97417	0.447865
Ma10_t10370.1	Ma10_g10370	-//-	mRNA	0	0	0	0	0	0	0	0	0	0	0	0	0	0	0	0	0	0	0	0	0	0	0	0
Ma11_t10770.1	Ma11_g10770	sp|Q9SE96|GEML1_ARATH GEM-like protein 1 OS=Arabidopsis thaliana GN=FIP1 PE=1 SV=1//5.80928e-48	mRNA	0	0	0	0	0	0	0	0	0	0	0	0	0	0	0	0	0	0	0	0	0	0	0	0
Ma11_t21120.1	Ma11_g21120	sp|O82268|LSH3_ARATH Protein LIGHT-DEPENDENT SHORT HYPOCOTYLS 3 OS=Arabidopsis thaliana GN=LSH3 PE=1 SV=1//9.40218e-39	mRNA	2.55932	3.43718	3.85706	3.95999	3.28554	3.27242	5.48399	3.23114	4.65115	3.79204	4.44236	6.0424	5.61716	2.80278	4.08361	3.54763	2.46242	2.99036	3.6829	3.94437	3.15154	5.84136	2.68051	5.48464
Ma02_t05230.1	Ma02_g05230	sp|O42901|YBA9_SCHPO Uncharacterized protein C119.09c OS=Schizosaccharomyces pombe (strain 972 / ATCC 24843) GN=SPBC119.09c PE=2 SV=3//6.88068e-27	mRNA	59.1285	47.015	44.6608	25.8957	24.8526	28.3507	49.2387	81.0481	58.012	48.7765	43.0639	35.5901	56.1293	47.0025	54.1043	41.8142	31.9831	27.5713	31.3633	31.4709	22.7234	36.6918	72.3497	41.3912
Ma06_t00500.1	Ma06_g00500	sp|Q9FEA2|SYEM_ARATH Glutamate--tRNA ligase, chloroplastic/mitochondrial OS=Arabidopsis thaliana GN=OVA3 PE=2 SV=1//3.14235e-07	mRNA	0	0.10877	0.209243	0.194813	0	0.368419	0.108264	0	0.332889	0.337303	0.79207	0.633793	0.094652	0	0	0.143619	0.237049	0.230787	0.676653	0	0.742575	0.846173	0	0.50759
Ma08_t15550.1	Ma08_g15550	sp|Q9LKJ1|HIBC1_ARATH 3-hydroxyisobutyryl-CoA hydrolase 1 OS=Arabidopsis thaliana GN=CHY1 PE=1 SV=1//4.8797e-169	mRNA	26.9486	36.4528	43.6335	31.579	39.2963	39.3762	29.7455	64.9379	32.0415	30.1265	33.3642	32.2976	25.8344	37.1055	36.8591	44.1998	40.6857	30.3862	29.1179	28.7598	25.9727	28.7232	70.9383	34.2925
Ma09_t21640.1	Ma09_g21640	sp|Q14690|RRP5_HUMAN Protein RRP5 homolog OS=Homo sapiens GN=PDCD11 PE=1 SV=3//8.43152e-48	mRNA	0	0	0	0.0386219	0	0.0472498	0	0	0	0.0455492	0	0.0426006	0	0	0	0	0	0	0.0549321	0.0510666	0	0.0382557	0	0.0398822
Ma09_t23510.1	Ma09_g23510	sp|P09469|VATA_DAUCA V-type proton ATPase catalytic subunit A OS=Daucus carota PE=2 SV=1//0	mRNA	30.9785	24.3868	48.471	41.6646	63.0005	73.9313	25.0239	20.7574	22.9385	29.0444	38.9622	38.6687	32.8723	46.4135	41.78	41.0463	24.9081	41.1197	48.229	41.8593	36.3586	35.0342	33.071	34.8885
Ma09_t23510.2	Ma09_g23510	sp|P09469|VATA_DAUCA V-type proton ATPase catalytic subunit A OS=Daucus carota PE=2 SV=1//0	mRNA	7.29399e-05	3.14736e-05	1.99462	1.36647e-05	1.60707e-05	2.23061e-05	2.00298e-05	2.87289e-05	0.000193486	1.70068e-05	1.83046e-05	1.54712e-05	0.0002763	9.10888e-05	0.000341973	2.5139e-05	1.59417e-05	3.01498e-05	1.25442e-05	1.11738e-05	2.11059e-05	3.14828e-05	2.58018e-05	1.60697e-05
Ma06_t06700.1	Ma06_g06700	sp|Q9SKI2|VPS2A_ARATH Vacuolar protein sorting-associated protein 2 homolog 1 OS=Arabidopsis thaliana GN=VPS2.1 PE=1 SV=2//6.94074e-116	mRNA	60.3049	43.1344	52.0738	23.2929	28.4583	28.7855	39.5693	158.816	51.5679	53.2978	44.1938	20.6508	48.6103	57.189	67.5546	37.2139	29.2863	29.3357	16.7367	17.3574	15.9839	26.1635	90.0163	34.8748
Ma07_t05340.1	Ma07_g05340	sp|C0LGK9|Y2242_ARATH Probable LRR receptor-like serine/threonine-protein kinase At2g24230 OS=Arabidopsis thaliana GN=At2g24230 PE=2 SV=1//0	mRNA	4.75974	3.049	3.96754	5.54659	5.03969	5.09788	2.46624	8.43669	2.50256	2.97197	3.22719	3.10906	3.2168	4.55859	4.53213	4.94685	8.89207	6.36284	4.50524	4.13122	4.51747	3.46689	4.97318	2.92335
Ma07_t24610.1	Ma07_g24610	sp|Q5N941|POLLU_ORYSJ Probable ion channel POLLUX OS=Oryza sativa subsp. japonica GN=Os01g0870100 PE=2 SV=1//8.4385e-09	mRNA	0.294691	0.500942	0.462258	1.04741	1.10882	0.913549	1.07769	0.347854	0.656191	1.70029	1.25522	1.25125	0.649404	0.304744	0.771959	1.28269	0.677062	1.86952	1.95509	1.15911	1.45372	1.36862	0.707567	1.48433
Ma07_t24610.2	Ma07_g24610	sp|Q5N941|POLLU_ORYSJ Probable ion channel POLLUX OS=Oryza sativa subsp. japonica GN=Os01g0870100 PE=2 SV=1//8.4385e-09	mRNA	5.78797	9.46459	7.01028	10.4884	6.69456	7.42858	7.34937	5.57997	7.99928	7.19606	8.40901	10.9263	6.27043	7.0136	6.27959	9.18348	11.5198	7.10329	7.63548	8.57746	8.14762	8.317	6.78629	7.21008
Ma06_t10900.1	Ma06_g10900	sp|P08770|TRA1_MAIZE Putative AC transposase OS=Zea mays PE=2 SV=2//4.94633e-33	mRNA	4.83455	5.90379	5.07801	6.10845	6.12139	6.66593	5.14158	7.761	5.12196	5.88611	4.90617	4.73174	5.63805	5.93783	6.07072	8.14062	8.67043	6.49063	6.73156	6.61033	5.23973	5.16649	8.33675	5.5621
Ma07_t09240.1	Ma07_g09240	sp|Q32KQ2|WDR53_BOVIN WD repeat-containing protein 53 OS=Bos taurus GN=WDR53 PE=2 SV=1//2.60416e-32	mRNA	6.0186	8.86176	9.00884	6.79513	9.11343	8.04219	7.4126	8.99372	6.90644	8.74457	8.82095	8.39456	4.53844	7.7763	8.10746	10.7655	7.96342	10.237	7.14257	7.10305	8.30986	7.80658	9.87251	8.57005
Ma06_t03580.1	Ma06_g03580	sp|Q9C5V5|GLR28_ARATH Glutamate receptor 2.8 OS=Arabidopsis thaliana GN=GLR2.8 PE=2 SV=2//0	mRNA	8.76974	5.2704	6.67666	3.8822	3.40771	2.12243	3.70997	10.4514	5.92832	2.68987	1.89729	1.72342	3.17175	6.10712	5.76031	4.79764	6.67876	1.18281	3.29957	3.72711	1.66711	2.06797	10.5444	3.27679
Ma03_t00930.1	Ma03_g00930	sp|O74503|UAF30_SCHPO Upstream activation factor subunit spp27 OS=Schizosaccharomyces pombe (strain 972 / ATCC 24843) GN=spp27 PE=1 SV=1//1.60257e-06	mRNA	17.6146	14.3353	19.1452	12.1992	11.8515	13.7136	13.6835	11.039	15.8155	12.7175	14.7131	10.7392	14.3178	14.3016	19.7613	10.5074	9.687	10.6412	15.8244	10.6966	11.6039	12.6945	17.8382	12.7041
Ma03_t29690.3	Ma03_g29690	sp|A2XQX0|ARP9_ORYSI Actin-related protein 9 OS=Oryza sativa subsp. indica GN=ARP9 PE=3 SV=2//0	mRNA	16.8347	17.0317	17.3718	20.3149	19.072	22.538	15.2438	20.2797	18.8977	14.3716	18.459	15.1628	19.0482	19.0986	18.3654	21.9444	19.2559	18.6873	14.5833	15.5165	17.5329	19.8925	18.9892	17.6537
Ma03_t14280.1	Ma03_g14280	sp|Q9LZ82|BTR1_ARATH Protein BTR1 OS=Arabidopsis thaliana GN=BTR1 PE=1 SV=1//4.55992e-123	mRNA	68.0951	43.5293	51.5983	35.9465	40.9429	43.1295	40.7842	49.7255	47.8457	38.2054	49.535	35.0803	59.4069	50.1967	62.0087	44.9792	40.4768	45.0239	35.1883	35.1456	39.067	41.7023	49.3292	36.1456
Ma03_t29690.1	Ma03_g29690	sp|A2XQX0|ARP9_ORYSI Actin-related protein 9 OS=Oryza sativa subsp. indica GN=ARP9 PE=3 SV=2//0	mRNA	9.25191e-05	0.000122404	7.59759e-05	8.20215e-05	0.000131165	8.5555e-05	0.411237	1.33819	0.000110404	9.05786e-05	0.000195044	0.371568	1.26091	0.61282	9.74694e-05	0.000219347	1.0102	0.392436	1.55779	1.56506	0.000179239	6.02044e-05	0.00013864	7.17075e-05
Ma10_t26280.1	Ma10_g26280	sp|Q8S3D1|BH068_ARATH Transcription factor bHLH68 OS=Arabidopsis thaliana GN=BHLH68 PE=2 SV=2//2.79165e-43	mRNA	5.26789	4.72437	2.31284	7.01302	3.66207	3.36194	6.00938	3.47361	6.01517	5.95665	8.65405	5.12912	5.36728	3.74292	4.5222	5.3848	5.69814	6.12356	6.66537	7.11622	9.62602	6.40503	2.6292	4.52385
Ma06_t11800.1	Ma06_g11800	-//-	mRNA	1.67571	2.98075	1.20231	1.55225	2.00966	1.62144	1.44286	2.53571	2.43947	1.29927	2.00507	2.25165	1.60187	1.87737	1.4257	1.78582	2.63297	1.94974	3.61022	4.04492	1.32228	2.00743	2.26223	3.0504
Ma04_t15470.1	Ma04_g15470	sp|O04326|NUP35_ARATH Nuclear pore complex protein NUP35 OS=Arabidopsis thaliana GN=NUP35 PE=1 SV=1//1.71828e-67	mRNA	6.43933	6.81562	5.76992	7.2384	7.11083	6.87521	5.35496	3.76673	5.7937	5.44391	6.32821	6.94022	5.84602	5.471	5.0256	6.87487	7.52791	6.8471	7.54061	7.37984	6.50194	5.53615	8.27975	6.67251
Ma08_t29580.1	Ma08_g29580	sp|Q500U8|TKPR1_ARATH Tetraketide alpha-pyrone reductase 1 OS=Arabidopsis thaliana GN=TKPR1 PE=1 SV=1//5.99992e-47	mRNA	5.39321	6.80215	7.17971	6.61655	5.45976	5.51365	6.36311	4.80564	6.09771	5.21549	4.09078	6.15286	4.39788	4.8601	3.56832	4.66115	5.28964	5.02636	6.06294	6.37449	7.24246	6.19507	4.19084	6.66912
Ma10_t02610.1	Ma10_g02610	-//-	mRNA	11.9618	16.2149	17.7477	16.0173	19.502	16.0515	26.5698	9.20054	13.5885	25.8585	25.9281	38.618	12.9189	8.95881	11.1198	13.4214	12.5355	13.5051	29.3155	33.7692	27.1101	22.2946	14.5314	23.4851
Ma06_t14360.1	Ma06_g14360	sp|Q9S745|PAD4_ARATH Lipase-like PAD4 OS=Arabidopsis thaliana GN=PAD4 PE=1 SV=1//4.70631e-95	mRNA	9.74576	11.7798	12.2583	9.5666	11.5472	10.0064	9.31885	7.99204	10.7266	7.0478	8.90109	11.0064	8.51676	9.58022	8.54229	8.20139	5.94791	6.50296	8.56198	9.39739	8.59331	12.2918	9.68088	10.7082
Ma05_t21780.1	Ma05_g21780	sp|Q9UKC9|FBXL2_HUMAN F-box/LRR-repeat protein 2 OS=Homo sapiens GN=FBXL2 PE=1 SV=3//2.53919e-20	mRNA	24.3895	22.345	27.3979	29.7696	33.862	34.1709	16.5615	49.7418	15.6154	22.5046	21.248	21.2139	18.7851	19.3973	18.5894	35.9558	43.9453	27.3114	31.4575	31.057	21.0476	19.9944	35.0314	22.8095
Ma09_t22160.2	Ma09_g22160	sp|F4JKK0|SUD1_ARATH Probable E3 ubiquitin ligase SUD1 OS=Arabidopsis thaliana GN=SUD1 PE=1 SV=1//1.67209e-07	mRNA	6.27803	16.5344	8.42472	6.33649	23.2852	22.2284	10.5876	72.0919	7.86601	14.9007	16.8314	14.0222	4.88072	7.82928	3.73324	51.6072	68.3348	20.598	19.8712	20.2449	7.51093	7.71109	45.1487	18.2275
Ma02_t10860.1	Ma02_g10860	sp|Q9LN49|KCS4_ARATH 3-ketoacyl-CoA synthase 4 OS=Arabidopsis thaliana GN=KCS4 PE=2 SV=1//0	mRNA	39.0373	38.4065	33.7486	43.7145	34.4446	24.4612	37.1429	30.1068	30.0004	34.0298	27.9342	30.5981	28.7571	24.7687	27.5435	38.6211	47.0986	25.3733	43.3241	47.3898	33.8906	29.5452	32.1107	33.0136
Ma03_t24420.3	Ma03_g24420	sp|Q6YYC0|C3H55_ORYSJ Zinc finger CCCH domain-containing protein 55 OS=Oryza sativa subsp. japonica GN=Os08g0135800 PE=2 SV=1//5.45121e-78	mRNA	1.59823	0.973416	1.89523	2.44623	2.78682	2.72516	3.89599	0.000841871	1.7187	1.07685	0.522516	2.55881	1.89382	0.927698	1.99539	3.62376	4.03456	3.22918	0.000372202	1.13622	1.12736	0.868845	3.25706	1.79701
Ma03_t24420.2	Ma03_g24420	sp|Q6YYC0|C3H55_ORYSJ Zinc finger CCCH domain-containing protein 55 OS=Oryza sativa subsp. japonica GN=Os08g0135800 PE=2 SV=1//5.45121e-78	mRNA	21.083	15.1501	9.50727	16.2854	14.9551	21.1575	10.5605	12.4979	21.5254	9.65884	14.4745	9.97366	26.8448	18.9408	21.4329	26.773	22.0832	20.8542	18.7285	14.7148	13.8703	21.1618	19.4064	15.5383
Ma02_t20250.1	Ma02_g20250	-//-	mRNA	17.4177	21.6295	16.1046	16.153	34.6953	27.0465	20.8456	132.371	9.99365	40.9129	30.9212	29.4976	11.4686	10.212	6.88331	35.0259	38.0562	33.1368	23.7532	23.6706	23.859	18.3494	62.1193	24.337
Ma06_t35440.1	Ma06_g35440	sp|Q9M0E2|RL282_ARATH 60S ribosomal protein L28-2 OS=Arabidopsis thaliana GN=RPL28C PE=2 SV=1//2.67358e-67	mRNA	9.5218	14.4198	9.30179	7.36534	7.67335	5.41788	17.691	5.7842	12.5936	11.8984	13.528	9.97793	7.92061	9.6049	12.1886	6.20836	7.31185	13.5169	5.86257	5.16558	12.5377	11.9267	8.03479	13.4518
Ma08_t31970.1	Ma08_g31970	sp|Q39265|ZFP6_ARATH Zinc finger protein 6 OS=Arabidopsis thaliana GN=ZFP6 PE=2 SV=1//3.19593e-09	mRNA	0	0	0	0	0	0	0	0	0.0852326	0	0	0	0	0	0	0	0	0	0.138567	0	0	0	0	0.104085
Ma06_t01700.1	Ma06_g01700	sp|Q8L7S6|HEXO3_ARATH Beta-hexosaminidase 3 OS=Arabidopsis thaliana GN=HEXO3 PE=1 SV=1//4.79837e-47	mRNA	1.79817	5.32538	2.97263	8.66377	4.08361	5.83688	4.99682	2.28762	3.68744	4.54528	3.60079	7.6072	3.56471	3.88978	3.34607	2.82682	3.18849	5.14221	3.41027	2.26539	6.29204	4.70669	2.57387	4.43192
Ma11_t06490.1	Ma11_g06490	sp|Q9SD80|TOM5_ARATH Mitochondrial import receptor subunit TOM5 homolog OS=Arabidopsis thaliana GN=TOM5 PE=1 SV=3//1.28808e-14	mRNA	13.7994	24.16	34.0385	23.2993	20.7333	21.9749	31.4081	10.8453	25.0641	26.3798	28.8904	34.0881	18.1388	15.5044	15.5703	13.6198	11.939	25.9672	21.4053	20.294	30.4786	27.397	9.19907	21.6268
Ma03_t17350.1	Ma03_g17350	-//-	mRNA	0	0	0	0	0	0	0	0	20.7003	0	0	0	0	0	53.0832	0	0	0	0	0	0	0	0	28.558
Ma02_t22210.2	Ma02_g22210	sp|Q9LZ23|ACR12_ARATH ACT domain-containing protein ACR12 OS=Arabidopsis thaliana GN=ACR12 PE=2 SV=1//8.01203e-91	mRNA	0.198541	1.895	0.745568	1.27341	0.897057	0.282546	0.524497	1.06809	1.83577	1.8866	1.42527	2.98885	1.39445	1.21612	1.14927	0.816091	1.92306	0.281032	0.936629	0.309425	2.6146	2.06839	0.709686	0.875616
Ma03_t12700.1	Ma03_g12700	-//-	mRNA	3.41058	1.65756	5.00903	3.13551	2.21349	5.30908	2.24356	2.00393	0.518742	3.24789	3.13258	2.85484	3.25621	3.72511	2.67451	3.5845	3.43577	4.03009	3.33827	3.15017	2.3713	4.04214	2.62038	2.65908
Ma06_t22320.1	Ma06_g22320	sp|Q6NLW5|XRI1_ARATH Protein XRI1 OS=Arabidopsis thaliana GN=XRI1 PE=1 SV=2//7.59395e-33	mRNA	2.37373e-05	0.220867	0.163964	0.577919	0.130592	0.555695	0.568362	0.978465	1.22583e-05	0.361939	2.77611e-05	3.93358e-06	1.11047	0.219447	0.854324	0.464499	0.614131	0.203179	7.82206e-06	5.49031e-06	0.689372	0.182979	0.232527	0.367233
Ma06_t22320.2	Ma06_g22320	sp|Q6NLW5|XRI1_ARATH Protein XRI1 OS=Arabidopsis thaliana GN=XRI1 PE=1 SV=2//7.59395e-33	mRNA	1.38249	1.19067	0.827012	1.1537	1.30567	1.00982	1.23741	1.77776e-05	2.14973	1.91701	2.04045	1.62851	1.1299	1.67224	0.609825	0.372986	0.25597	1.59476	1.9055	1.27127	1.95363	0.945403	1.03602	0.952965
Ma08_t14060.1	Ma08_g14060	sp|Q8LSQ2|SR43C_ORYSJ Probable signal recognition particle 43 kDa protein, chloroplastic OS=Oryza sativa subsp. japonica GN=Os03g0131900 PE=2 SV=1//1.39855e-101	mRNA	2.50373	4.19843	2.51951	7.00132	8.38565	6.64117	2.75908	1.73207	2.93675	3.33342	2.34499	6.9844	2.74251	1.64158	1.61844	10.1788	10.801	3.9817	9.70573	10.2628	4.16066	3.70246	3.30936	6.85496
Ma04_t11380.1	Ma04_g11380	sp|O80339|ERF82_ARATH Ethylene-responsive transcription factor 3 OS=Arabidopsis thaliana GN=ERF3 PE=1 SV=1//1.34649e-17	mRNA	33.5446	30.0902	23.4912	30.6044	28.4995	25.2995	23.2011	33.9724	24.6076	27.9287	25.9649	27.6315	30.4332	25.6386	30.3869	37.3947	39.0801	32.3229	37.5154	37.6942	34.4805	27.4536	32.2492	31.6792
Ma00_t03150.1	Ma00_g03150	sp|B7KWT4|RUTD_METC4 Putative aminoacrylate hydrolase RutD OS=Methylobacterium extorquens (strain CM4 / NCIMB 13688) GN=rutD PE=3 SV=1//7.4041e-14	mRNA	3.36944	1.41419	2.97344	1.18872	2.41284	1.77353	1.95797	10.0035	1.73603	3.05928	1.4914	0.985942	1.49897	2.4325	2.19606	1.56406	1.22048	1.19409	1.14536	0.985073	1.17282	1.15259	3.63483	1.04194
Ma08_t10910.2	Ma08_g10910	sp|Q14692|BMS1_HUMAN Ribosome biogenesis protein BMS1 homolog OS=Homo sapiens GN=BMS1 PE=1 SV=1//2.72121e-126	mRNA	21.0399	18.5567	17.2039	18.58	20.2824	22.806	16.3355	9.66691	20.6836	16.0522	18.7301	18.0924	21.3846	24.0558	24.5459	22.1568	24.409	22.2168	17.5071	19.6281	18.3779	17.9354	18.5654	17.4694
Ma05_t07810.2	Ma05_g07810	sp|Q5XQC7|BON3_ARATH Protein BONZAI 3 OS=Arabidopsis thaliana GN=BON3 PE=1 SV=1//0	mRNA	25.4807	28.7725	26.6559	22.413	26.1905	30.1817	22.8849	100.27	15.5026	30.5126	24.4985	27.2104	25.6092	29.8489	26.4173	42.2674	36.8594	34.9516	34.3963	34.1664	27.3249	24.6745	76.8506	32.4757
Ma05_t07810.1	Ma05_g07810	sp|Q5XQC7|BON3_ARATH Protein BONZAI 3 OS=Arabidopsis thaliana GN=BON3 PE=1 SV=1//0	mRNA	3.16911	1.68068	3.14242	2.62603	2.70959	3.84348	2.07931	5.6491	2.88474	2.49594	1.02664	3.0174	2.53154	3.94962	2.40762	4.23417	7.22915	4.67586	2.36015	3.53313	1.90583	3.47801	5.12219	2.35404
Ma02_t10230.1	Ma02_g10230	-//-	mRNA	41.3436	36.4624	36.9029	32.7897	36.1101	38.5458	29.0346	52.5343	32.4158	39.4478	35.8279	38.4041	49.2585	38.497	45.0452	46.4754	33.8425	37.0221	35.3464	37.0972	31.3548	38.4712	40.9734	39.5126
Ma06_t22330.1	Ma06_g22330	-//-	mRNA	0	0	0	0	0	0	0	0	0	0	0	0	0	0	0	0	0	0	0	0	0	0	0	0
Ma01_t13270.1	Ma01_g13270	sp|Q7XJE6|MCA1_ARATH Metacaspase-1 OS=Arabidopsis thaliana GN=AMC1 PE=1 SV=1//2.83558e-13	mRNA	0.825696	0.457339	0.43977	1.01018	0	0.538179	0.651914	1.5514	0.167451	1.79805	1.16504	0	0.185783	1.12369	0.99042	0.578511	1.66398	0.689223	0.269581	0.254245	1.04522	0.373137	1.26947	0.641892
Ma11_t12280.1	Ma11_g12280	sp|Q8RX79|APG3_ARATH Peptide chain release factor APG3, chloroplastic OS=Arabidopsis thaliana GN=APG3 PE=2 SV=1//0	mRNA	3.0066	5.42568	6.26907	4.2856	4.15484	4.43683	5.82985	5.50384	4.90778	4.48732	2.8707	4.67568	0.859797	3.75743	3.40532	3.6583	3.64992	4.07396	3.15444	2.88508	4.18362	2.75727	6.59008	4.43875
Ma11_t12280.2	Ma11_g12280	sp|Q8RX79|APG3_ARATH Peptide chain release factor APG3, chloroplastic OS=Arabidopsis thaliana GN=APG3 PE=2 SV=1//0	mRNA	4.03605	0.807672	1.42761	0.638284	0.761319	0.173166	0.193025	2.71024	2.3301	1.46043e-05	1.70801	1.06105e-05	4.80434	1.8528	3.76325	0.551062	1.455	0.922905	0.201369	0.381477	0.409098	1.367	1.70886	1.14489
Ma02_t07180.1	Ma02_g07180	sp|Q99PV0|PRP8_MOUSE Pre-mRNA-processing-splicing factor 8 OS=Mus musculus GN=Prpf8 PE=1 SV=2//0	mRNA	80.6741	70.4688	75.1643	89.446	86.2779	98.6561	73.9165	62.3857	81.0317	74.2863	75.1958	73.0097	86.9305	96.878	88.1704	96.6471	94.0818	82.8462	85.7966	83.9469	80.0672	78.2526	80.351	69.6938
Ma06_t21140.1	Ma06_g21140	sp|Q0DA50|C3H45_ORYSJ Zinc finger CCCH domain-containing protein 45 OS=Oryza sativa subsp. japonica GN=Os06g0677700 PE=3 SV=1//0	mRNA	17.0847	16.7678	16.9822	15.1646	15.292	15.1945	15.9113	11.9801	15.7724	13.0138	17.5713	14.4174	16.3501	16.1727	19.0031	17.5247	14.2999	15.2753	14.063	13.7253	13.3599	12.9938	14.9385	13.9631
Ma04_t39140.2	Ma04_g39140	sp|Q0WV13|GAUTD_ARATH Probable galacturonosyltransferase 13 OS=Arabidopsis thaliana GN=GAUT13 PE=2 SV=1//0	mRNA	3.94246	1.9134	4.11634	2.09706	2.33706	1.56856	3.74475	5.72001	3.37792	6.79728	3.89005	2.98582	3.12482	3.5401	3.83123	1.16019	1.48119	1.91606	2.29796	1.93991	2.83619	2.30088	3.01041	2.27064
Ma04_t39140.1	Ma04_g39140	sp|Q0WV13|GAUTD_ARATH Probable galacturonosyltransferase 13 OS=Arabidopsis thaliana GN=GAUT13 PE=2 SV=1//0	mRNA	0.195145	0.219358	1.18357e-05	0.000182676	3.21619e-05	4.86843e-06	5.36249e-05	1.35296e-05	0.000100193	3.57016e-05	1.15923e-05	0.000530176	0.000159058	0.544864	0.300448	1.92908e-05	9.53215e-06	0.375811	4.93194e-05	1.57056e-05	0.000189692	0.191182	0.350161	0.262435
Ma10_t26770.1	Ma10_g26770	sp|Q8VXY7|ENT1_ARATH Equilibrative nucleotide transporter 1 OS=Arabidopsis thaliana GN=ENT1 PE=1 SV=1//8.59695e-170	mRNA	0.153982	0.269564	1.38346e-05	1.13874	0.124699	0.306299	0.477094	2.22859e-05	0.332374	0.363845	0.226224	7.44388e-06	1.34188e-05	0.197315	0.157396	0.323032	0.854668	0.419878	0.392662	0.732993	0.181152	7.82155e-06	0.595472	0.627597
Ma08_t27120.1	Ma08_g27120	sp|Q8VZ37|AP3S_ARATH AP-3 complex subunit sigma OS=Arabidopsis thaliana GN=At3g50860 PE=2 SV=1//4.50833e-77	mRNA	8.27075	7.6559	7.0388	5.37695	5.42212	4.43317	8.29846	8.80584	6.81193	7.44472	6.73922	5.9658	6.37223	5.37508	6.71537	2.72916	4.19995	5.5724	3.66165	4.61053	4.69582	5.39734	8.59902	5.35302
Ma01_t12650.1	Ma01_g12650	sp|Q8LCG7|NFYC2_ARATH Nuclear transcription factor Y subunit C-2 OS=Arabidopsis thaliana GN=NFYC2 PE=2 SV=2//1.39124e-58	mRNA	49.7841	37.7025	45.3442	47.177	39.9793	30.101	30.2962	17.7428	41.7752	25.5296	37.4827	36.4728	49.3949	44.8025	47.467	41.6304	29.7543	25.2394	30.771	38.5172	29.2417	31.8483	39.4527	35.9009
Ma02_t18350.1	Ma02_g18350	sp|O49459|NAC73_ARATH NAC domain-containing protein 73 OS=Arabidopsis thaliana GN=NAC073 PE=2 SV=1//1.2191e-84	mRNA	1.18499	0.733787	0.705764	2.39853	2.57395	3.19419	1.30612	0.505625	1.33655	1.36078	1.40006	1.61041	1.88352	1.20823	1.85861	1.88242	2.03521	2.02294	2.51746	2.67622	2.96996	1.83045	0.42822	1.94584
Ma05_t09060.1	Ma05_g09060	sp|Q9ZU65|OFP7_ARATH Transcription repressor OFP7 OS=Arabidopsis thaliana GN=OFP7 PE=2 SV=1//2.21044e-16	mRNA	0	0.0871783	0	0	0	0	0.0890915	0	0.0341983	0	0	0.347047	0.118408	0	0	0	0.195191	0	0.111867	0.260006	0.132401	0.0779041	0.0656645	0.0406257
Ma06_t07590.1	Ma06_g07590	sp|Q764B9|ASB2_ORYSJ Anthranilate synthase beta subunit 2, chloroplastic OS=Oryza sativa subsp. japonica GN=ASB2 PE=2 SV=1//9.60658e-116	mRNA	71.6885	97.1837	70.2266	61.1924	59.4188	57.2999	79.9709	91.346	80.555	73.4869	79.0267	69.9144	90.4759	70.1574	76.083	74.7746	55.456	71.1822	50.8239	52.8379	56.6982	78.0152	73.7505	78.9236
Ma07_t24440.2	Ma07_g24440	sp|P0DH79|Y5064_ARATH CBS domain-containing protein CBSCBSPB5 OS=Arabidopsis thaliana GN=CBSCBSPB5 PE=1 SV=1//0	mRNA	15.573	11.9984	15.8755	7.97024	10.8016	9.09599	12.1897	25.3681	14.0012	9.51409	10.9191	7.20868	10.9469	14.4485	14.3617	11.5532	12.16	10.1469	5.84617	5.65566	6.59552	9.19423	25.2284	10.2025
Ma06_t15380.1	Ma06_g15380	sp|O49453|Y4844_ARATH Uncharacterized protein At4g28440 OS=Arabidopsis thaliana GN=At4g28440 PE=1 SV=1//7.5978e-50	mRNA	7.49598	13.06	18.502	12.4329	16.8868	17.9188	14.4095	19.5652	11.318	16.5705	14.192	16.4605	8.81954	12.663	7.52567	15.1234	15.0697	16.1682	19.0426	13.67	17.7363	13.6801	17.8296	11.6144
Ma06_t15380.2	Ma06_g15380	sp|O49453|Y4844_ARATH Uncharacterized protein At4g28440 OS=Arabidopsis thaliana GN=At4g28440 PE=1 SV=1//7.5978e-50	mRNA	3.10974	2.06931	0.742983	1.38569	0.792738	0.59692	2.31358	4.00999	2.94741	1.84972	2.52046	2.79695	1.97229	0.448587	4.62188	1.14904e-05	1.58929	1.06552	0.561283	4.90819	3.38973	0.874047	2.82891	2.23613
Ma01_t01560.1	Ma01_g01560	-//-	mRNA	0	0	0	0	0	0	0	0	0	0	0	0	0	0	0	0	0	0	0	0	0	0	0	0
Ma10_t03550.1	Ma10_g03550	sp|Q7XR02|IBH1_ORYSJ Transcription factor IBH1 OS=Oryza sativa subsp. japonica GN=IBH1 PE=1 SV=2//1.6899e-07	mRNA	1.52601	0.618189	2.56415	1.77932	3.96737	7.79624	1.34521	0.276075	3.97867	2.47219	1.099	4.43034	5.05341	2.33193	3.02149	0.523832	2.99072	5.46833	5.3176	3.87946	8.67056	3.49616	2.10019	3.88867
Ma08_t05440.1	Ma08_g05440	sp|Q84WB7|GT645_ARATH Glycosyltransferase family protein 64 protein C5 OS=Arabidopsis thaliana GN=At5g04500 PE=2 SV=1//0	mRNA	21.0451	23.2816	23.1585	20.642	21.6973	20.4166	15.3038	17.2196	16.8345	15.1897	20.0128	15.6626	19.7793	21.547	20.4919	20.5507	18.9429	16.9673	18.085	19.5503	17.0484	18.3904	19.3517	15.7624
Ma05_t23240.1	Ma05_g23240	-//-	mRNA	0	0	0	0	0	0	0	0	0	0	0	0	0	0	0	0	0	0	0	0	0	0	0	0
Ma09_t18280.6	Ma09_g18280	sp|O80396|M2K3_ARATH Mitogen-activated protein kinase kinase 3 OS=Arabidopsis thaliana GN=MKK3 PE=1 SV=1//0	mRNA	5.73143	2.09103	3.67449	4.00831	2.38674	1.7113	3.5417	3.87063	2.11894	2.08647	2.01804	2.84886	6.96964	3.87986	3.11636	1.79745	1.89812	2.1785	3.11648	1.09073	1.48728	1.57612	2.89003	2.87209
Ma09_t18280.7	Ma09_g18280	sp|O80396|M2K3_ARATH Mitogen-activated protein kinase kinase 3 OS=Arabidopsis thaliana GN=MKK3 PE=1 SV=1//0	mRNA	2.40934	1.42357	2.93228	1.85312	2.94485	3.34916	1.07261	3.85501	3.06963	2.9376	2.67013	2.59026	3.59087	2.24874	4.85881	3.76601	2.71606	2.70911	1.62137	3.07859	2.08594	2.21239	2.0206	2.25766
Ma09_t18280.4	Ma09_g18280	sp|O80396|M2K3_ARATH Mitogen-activated protein kinase kinase 3 OS=Arabidopsis thaliana GN=MKK3 PE=1 SV=1//0	mRNA	5.96102	7.97361	3.79298	2.77839	8.44128	7.95718	5.57008	6.71418	6.23549	4.34643	6.26706	5.64115	3.73811	6.32873	5.17261	5.99336	3.91803	2.80699	3.07758	2.80881	4.73611	5.46574	7.09868	4.80617
Ma09_t18280.5	Ma09_g18280	sp|O80396|M2K3_ARATH Mitogen-activated protein kinase kinase 3 OS=Arabidopsis thaliana GN=MKK3 PE=1 SV=1//0	mRNA	0.579257	1.34058	0.209782	2.26413	0.618924	2.50808	0.821556	0.646523	1.03672e-05	1.24611	1.75983	1.31988	2.31134	1.64601	0.974029	1.57027	2.5461	2.5752	3.02626	4.01792	2.90615	1.86221	2.58416	1.29844
Ma09_t18280.2	Ma09_g18280	sp|O80396|M2K3_ARATH Mitogen-activated protein kinase kinase 3 OS=Arabidopsis thaliana GN=MKK3 PE=1 SV=1//0	mRNA	3.58757	2.78323	5.13772	1.71639	1.4379	3.23399	2.41287	2.31051	1.91847	1.74528	2.2204	2.67403	2.21368	3.47157	2.9655	3.12426	3.34247	2.97572	2.43854	2.62092	1.17831	3.23445	2.40735	3.57189
Ma09_t18280.3	Ma09_g18280	sp|O80396|M2K3_ARATH Mitogen-activated protein kinase kinase 3 OS=Arabidopsis thaliana GN=MKK3 PE=1 SV=1//0	mRNA	2.84263e-05	2.61784e-05	1.52095e-05	0.28463	1.11571e-05	7.29614e-05	9.06673e-06	0.528281	0.248787	6.28346e-05	0.350056	9.56475e-07	0.248468	0.333828	0.213469	1.26227	5.23279e-05	0.281607	0.672189	0.62274	1.01544e-05	0.445161	0.592125	2.07488e-05
Ma09_t18280.1	Ma09_g18280	sp|O80396|M2K3_ARATH Mitogen-activated protein kinase kinase 3 OS=Arabidopsis thaliana GN=MKK3 PE=1 SV=1//0	mRNA	7.48532e-13	7.19272e-07	0.26932	0.515763	1.64278e-05	0.607953	1.58017e-06	0.378957	4.45395e-08	0.247111	0.443414	0.000115685	2.34116e-14	5.01893e-11	0.235372	0.479252	0.483509	0.238139	0.190131	7.38545e-06	5.58138e-08	0.179026	0.453911	4.53723e-07
Ma01_t03700.3	Ma01_g03700	sp|P36096|TUL1_YEAST Transmembrane E3 ubiquitin-protein ligase 1 OS=Saccharomyces cerevisiae (strain ATCC 204508 / S288c) GN=TUL1 PE=1 SV=1//1.19376e-35	mRNA	13.7691	17.1949	15.823	12.8721	13.8384	13.8418	19.3298	35.4441	11.6926	11.333	12.3739	11.8572	4.39819	11.6777	12.1934	19.6396	16.1499	13.8751	8.92094	11.1945	10.5678	11.3977	33.272	6.14132
Ma04_t25250.1	Ma04_g25250	sp|Q9SP55|VATG_CITLI V-type proton ATPase subunit G OS=Citrus limon GN=VATG PE=3 SV=1//3.64166e-39	mRNA	63.1628	55.7493	50.9599	37.16	36.1142	36.0503	61.2314	44.8193	65.9961	44.764	56.2424	42.3913	63.2216	59.1755	65.8791	39.522	34.5148	46.0646	39.3199	35.7057	36.3028	49.0943	57.5704	54.244
Ma09_t10440.1	Ma09_g10440	sp|Q5U9T2|LECH_HORVU Horcolin OS=Hordeum vulgare PE=3 SV=1//2.25571e-07	mRNA	565.94	629.732	251.616	459.833	904.224	732.035	194.786	2745.29	683.501	604.744	181.53	302.983	363.229	96.4337	77.6464	630.369	817.346	87.2104	369.107	616.483	728.616	103.643	1388.87	375.465
Ma02_t22120.1	Ma02_g22120	-//-	mRNA	1.09009	1.50534	2.1456	1.60889	1.16031	0.655457	0.917776	1.43374	1.23598	1.01515	0.88219	1.00245	1.0012	2.04597	1.5818	1.71007	1.9497	1.40695	1.76711	1.57378	1.62177	1.18254	2.37785	1.52049
Ma03_t28930.1	Ma03_g28930	-//-	mRNA	0	0	0	0	0	0	0	0	0	0	0	0	0	0	0	0	0	0	0	0	0	0	0	0
Ma10_t23300.1	Ma10_g23300	-//-	mRNA	23.6352	16.4365	16.1033	9.97151	32.6376	42.1062	11.0614	12.7523	11.1526	11.0898	14.7989	24.6956	36.9158	18.2246	19.8757	41.8282	26.525	24.8188	44.6771	36.3185	27.9501	27.1835	10.7223	36.4033
Ma04_t19000.3	Ma04_g19000	-//-	mRNA	0.823359	1.35535	1.07408	1.01721	2.70633	3.19881	2.60643	4.64308	1.62217	0.680659	2.18492	1.83139	4.55499	1.41875	2.07255	4.17141	3.84634	5.25753	1.68167	2.81761	2.70062	0.932211	3.77725	0.757243
mito3_t00020.1	mito3_g00020	-//-	mRNA	19.6315	11.8657	12.5282	8.62999	7.97581	4.11243	4.85703	4.33633	12.5903	11.4159	7.8184	4.75374	18.1074	15.0948	20.3855	4.11469	4.58851	16.1008	4.38109	3.35808	4.66968	6.25283	2.25664	4.13652
Ma04_t24170.1	Ma04_g24170	sp|P33543|TMKL1_ARATH Putative kinase-like protein TMKL1 OS=Arabidopsis thaliana GN=TMKL1 PE=1 SV=1//2.94129e-63	mRNA	0.0781082	0.0671077	0.548634	0.303171	0.66815	0.480157	0.17216	0.660266	0.184999	0.50211	0.141526	0.502821	0.0611467	0.228588	0.0810021	0.136741	0.113167	0.110714	0.129796	0.361707	0.273391	0.150706	0.253921	0.15633
Ma11_t04760.1	Ma11_g04760	sp|O64479|PME10_ARATH Putative pectinesterase 10 OS=Arabidopsis thaliana GN=PME10 PE=2 SV=1//7.01005e-36	mRNA	0	0	0	0	0	0	0	0	0	0	0	0	0	0	0	0	0	0	0	0	0	0	0	0
Ma08_t13420.1	Ma08_g13420	sp|Q9FT97|AGAL1_ARATH Alpha-galactosidase 1 OS=Arabidopsis thaliana GN=AGAL1 PE=2 SV=1//1.49131e-06	mRNA	0	0	0	0	0	0	0	0	0	0	0	0	0	0	0	0	0	0	0	0	0	0	0	0
Ma09_t30140.1	Ma09_g30140	-//-	mRNA	0	0	0	0	0.214466	0.240818	0	0.703726	0	0	0	0	0	0	0.354329	0	0.216216	0	0	0	0	0.510059	0.866769	0
Ma03_t22650.1	Ma03_g22650	sp|Q9SKB3|PARG1_ARATH Poly(ADP-ribose) glycohydrolase 1 OS=Arabidopsis thaliana GN=PARG1 PE=1 SV=2//0	mRNA	33.8296	29.9264	34.3592	21.0799	20.9665	21.1568	27.745	51.08	29.7033	26.1634	28.8956	18.8793	20.1599	30.2574	32.199	27.0147	22.6394	18.5363	15.5739	17.2957	14.8068	18.8819	45.4096	23.3546
Ma10_t19540.1	Ma10_g19540	-//-	mRNA	6.31875	4.51582	5.33783	5.51241	6.07135	6.16748	4.54338	6.43405	4.59064	5.03972	4.78384	5.65867	6.85288	5.38489	5.27383	8.13766	7.42101	5.95621	6.16088	6.43124	4.69816	5.38531	6.55924	5.38868
Ma06_t32020.1	Ma06_g32020	sp|Q8N573|OXR1_HUMAN Oxidation resistance protein 1 OS=Homo sapiens GN=OXR1 PE=1 SV=2//1.30665e-19	mRNA	39.5203	39.8873	35.5046	30.2288	41.6461	43.8009	26.309	61.2048	31.8638	28.6994	33.8792	29.6373	35.3856	44.1182	48.3737	47.2894	38.4784	33.1493	27.0275	29.408	23.0913	30.1684	55.844	33.1257
Ma11_t17030.1	Ma11_g17030	sp|F4IAG2|SSY3_ARATH Starch synthase 3, chloroplastic/amyloplastic OS=Arabidopsis thaliana GN=SS3 PE=1 SV=1//1.45422e-126	mRNA	4.23138	7.92128	12.7399	8.53329	8.83344	10.4005	6.05158	1.72709	5.60773	8.34832	10.5521	9.42244	8.007	7.9743	5.23317	9.15108	6.26763	10.4799	9.97884	9.90803	7.72653	8.60788	3.48656	8.53643
Ma10_t16360.1	Ma10_g16360	sp|P57108|GSTZ_EUPES Glutathione S-transferase zeta class OS=Euphorbia esula PE=2 SV=1//6.4292e-89	mRNA	8.14803	9.33874	7.00446	8.73789	8.34712	9.64948	8.32046	6.19119	9.48058	6.11003	8.11722	9.76587	12.9229	11.095	12.5563	9.10385	7.05193	11.3507	8.63343	9.35507	9.80673	11.8335	8.26315	9.70182
Ma05_t25690.2	Ma05_g25690	sp|Q8L7F9|B3GTF_ARATH Beta-1,3-galactosyltransferase 15 OS=Arabidopsis thaliana GN=B3GALT15 PE=2 SV=1//0	mRNA	19.2089	11.1465	12.4006	11.2714	9.3676	15.3842	9.16666	15.0211	14.1753	8.46289	9.59481	9.7014	13.5755	16.9002	16.5603	11.9687	10.7033	7.11948	5.74818	8.64158	7.87421	12.3291	14.4317	8.01342
Ma03_t27030.1	Ma03_g27030	sp|P0C8A0|PP275_ARATH Pentatricopeptide repeat-containing protein At3g49730 OS=Arabidopsis thaliana GN=At3g49730 PE=2 SV=1//0	mRNA	2.14816	1.67862	2.12192	1.5633	1.60977	1.80204	1.75162	3.3051	1.55953	1.5847	1.43747	1.30242	1.57598	1.61672	1.76387	1.37744	1.43046	1.43659	1.72561	1.65842	1.6617	1.53634	1.26863	1.86139
Ma04_t00200.1	Ma04_g00200	sp|Q9FL42|ATL69_ARATH Putative RING-H2 finger protein ATL69 OS=Arabidopsis thaliana GN=ATL69 PE=3 SV=1//3.70054e-38	mRNA	0.495995	0.265422	1.53178	0.23703	0.830726	0.604284	0.261683	0	0.201253	0.950333	0.687359	0.383238	0	0	0.554246	0	0	0.417677	1.30638	0.611619	1.27711	0.453415	0.191962	1.98287
Ma02_t03930.1	Ma02_g03930	sp|Q0DM51|RH3_ORYSJ DEAD-box ATP-dependent RNA helicase 3, chloroplastic OS=Oryza sativa subsp. japonica GN=Os03g0827700 PE=2 SV=2//0	mRNA	3.63144	4.08292	5.72842	5.45234	5.44388	6.6548	5.13775	3.22201	5.39295	5.03696	4.31522	4.68186	3.28748	4.66437	3.88941	4.722	6.20471	5.37056	4.06077	6.07541	4.16721	3.30434	3.76721	3.22724
Ma02_t03930.2	Ma02_g03930	sp|Q0DM51|RH3_ORYSJ DEAD-box ATP-dependent RNA helicase 3, chloroplastic OS=Oryza sativa subsp. japonica GN=Os03g0827700 PE=2 SV=2//0	mRNA	2.28009	3.64428	4.05464	3.11842	4.2422	4.20509	2.54006	2.26339	2.66642	2.07321	3.15736	2.44894	1.87084	2.25598	2.27258	4.09706	3.62655	3.89542	3.69872	1.92604	3.04667	2.78187	3.07038	3.03179
Ma10_t09780.1	Ma10_g09780	-//-	mRNA	3.8795	0	0	0.753125	1.02704	2.40884	0	130.47	4.57327	0.143426	0	0	1.56172	1.78938	0.589347	0.367175	14.6795	0	1.37982	0.646401	0	0.119693	6.28607	0.657001
Ma03_t16940.1	Ma03_g16940	sp|O24466|RAE1A_ARATH Ras-related protein RABE1a OS=Arabidopsis thaliana GN=RABE1A PE=1 SV=1//2.14852e-112	mRNA	18.5626	15.6642	20.5137	15.6421	11.4878	12.3722	17.9348	25.9779	18.9598	16.6118	19.4151	16.8114	13.8885	16.0532	18.555	10.0522	10.5344	10.5168	10.1775	10.9243	16.2542	15.6246	18.6901	16.1236
Ma02_t09330.1	Ma02_g09330	sp|Q8S9J2|SYYC1_ARATH Tyrosine--tRNA ligase 1, cytoplasmic OS=Arabidopsis thaliana GN=At2g33840 PE=2 SV=1//2.29829e-42	mRNA	0	0	0.245032	0.898308	0	0	0	0.429412	0.184978	0	0.258622	0.469836	0	0.250832	0.222885	0	0	0.253192	0.297153	0	0	0.61652	0	0
Ma10_t29190.1	Ma10_g29190	sp|Q8GXZ3|Y5102_ARATH Serine/threonine-protein kinase At5g01020 OS=Arabidopsis thaliana GN=At5g01020 PE=1 SV=1//0	mRNA	5.49681	2.93466	5.95567	10.8238	7.81364	9.58085	5.61103	1.99727	7.64042	6.25414	4.33561	10.6596	6.6758	6.51053	5.89463	5.5502	5.98224	5.66018	11.2994	9.11929	13.9029	9.64328	3.02628	7.16389
Ma08_t17200.2	Ma08_g17200	sp|Q93Z92|RING4_ARATH E3 ubiquitin-protein ligase At4g11680 OS=Arabidopsis thaliana GN=At4g11680 PE=2 SV=1//1.34219e-33	mRNA	1.48402	3.29773	1.11734	2.63531	3.36452	3.78391	0.69799	1.78133	1.13576	1.64058	2.15611	4.63579	3.94041	2.072	2.31296	1.18246	2.07	2.68655	0.986969	1.44564	1.87512	3.04228	2.37314e-05	1.99272
Ma11_t17020.2	Ma11_g17020	sp|Q9SKX5|PAO2_ARATH Probable polyamine oxidase 2 OS=Arabidopsis thaliana GN=PAO2 PE=2 SV=1//0	mRNA	0.890505	1.24036	7.77502e-06	2.91216	0.906344	0.718297	1.87679	6.38854	1.76749	1.78762	2.88257	1.6917	0.838379	1.2789	0.530964	1.15552	0.515099	0.78367	4.18183	0.000162382	1.82947	1.29085	3.28048	1.15235
Ma11_t17020.1	Ma11_g17020	sp|Q9SKX5|PAO2_ARATH Probable polyamine oxidase 2 OS=Arabidopsis thaliana GN=PAO2 PE=2 SV=1//0	mRNA	34.4967	21.8447	32.4514	24.1947	19.3781	13.7129	31.8498	111.49	24.1145	32.4414	32.0431	18.7227	21.5331	23.7517	25.1495	15.0997	21.2781	16.0782	26.614	29.5688	18.9307	18.8748	55.3803	20.2753
Ma09_t24110.1	Ma09_g24110	sp|D4N500|DIOX1_PAPSO Thebaine 6-O-demethylase OS=Papaver somniferum GN=T6ODM PE=1 SV=1//1.2367e-46	mRNA	3.48649	2.72122	0.420644	0	0.152677	0.0537593	10.655	15.4949	1.02735	11.4528	2.24843	0.289615	0.570232	0.236637	0.0786426	0.853219	0.108572	1.06113	0.0622053	0.173567	0.0490568	0.822916	0.730328	0.543534
Ma11_t07490.1	Ma11_g07490	sp|P30986|RETO_ESCCA Reticuline oxidase OS=Eschscholzia californica GN=BBE1 PE=1 SV=1//5.1876e-152	mRNA	2.45704	0.788689	2.71245	2.81047	4.5106	4.32692	1.89597	0.600175	0.944789	1.89869	2.77701	1.34203	2.76055	1.60416	2.03135	2.24846	2.99462	1.84877	4.42748	3.01739	1.3709	1.46728	0.181683	2.27107
Ma11_t18870.1	Ma11_g18870	sp|Q7XI75|CARM1_ORYSJ Probable histone-arginine methyltransferase CARM1 OS=Oryza sativa subsp. japonica GN=CARM1 PE=2 SV=1//0	mRNA	34.1748	28.2385	24.8859	25.0845	29.7039	27.2255	34.1482	34.4638	35.2043	25.4494	30.4265	26.5424	33.7928	35.4947	37.8945	30.8876	32.9813	27.0119	25.3614	25.1196	26.0934	28.4589	38.4856	26.7222
Ma03_t17610.5	Ma03_g17610	sp|Q8L7S0|ULP2B_ARATH Probable ubiquitin-like-specific protease 2B OS=Arabidopsis thaliana GN=ULP2B PE=1 SV=3//4.0089e-136	mRNA	11.0214	9.8337	8.53945	11.643	13.4064	12.1545	8.89831	12.7221	8.84047	7.59074	9.98001	10.4217	11.305	9.39086	10.4551	12.4501	13.9188	8.49783	11.5774	8.55917	8.22039	9.90915	14.3812	10.6051
Ma08_t06050.1	Ma08_g06050	sp|Q9LI74|CHUP1_ARATH Protein CHUP1, chloroplastic OS=Arabidopsis thaliana GN=CHUP1 PE=1 SV=1//2.60075e-79	mRNA	0.837802	1.4915	1.22089	1.95018	1.16415	0.977502	1.30356	0.73837	1.25065	0.916591	1.27199	1.42764	1.59215	1.69849	1.55667	1.85495	1.74949	1.57204	0.819096	0.836829	1.71482	1.45522	0.865275	1.21233
Ma04_t39430.1	Ma04_g39430	sp|Q6Z4G3|RGP3_ORYSJ UDP-arabinopyranose mutase 3 OS=Oryza sativa subsp. japonica GN=UAM3 PE=1 SV=1//0	mRNA	2.22369	4.85049	8.17275	3.83792	5.67671	6.90245	5.88122	1.26606	10.8957	10.7386	5.8967	17.1074	6.96011	4.30753	4.27647	1.63407	5.72723	5.21336	15.9184	13.4331	33.8228	13.6944	1.44557	14.2856
Ma10_t11240.1	Ma10_g11240	sp|Q9C6P6|STGL4_ARATH Stigma-specific STIG1-like protein 4 OS=Arabidopsis thaliana GN=At1g50650 PE=3 SV=1//1.06889e-07	mRNA	0	0	0	0	0	0	0	0	0	0	0	0	0	0	0	0.350141	0	0.276677	0	0	0	0	0	0
Ma09_t24100.1	Ma09_g24100	-//-	mRNA	0	0	0	0	0	0	0	0	0	0	0	0	0	0	0	0	0	0	0	0	0	0	1.23411	0
Ma04_t33230.1	Ma04_g33230	sp|Q7XJ98|KATAM_ARATH Xyloglucan galactosyltransferase KATAMARI1 OS=Arabidopsis thaliana GN=KAM1 PE=1 SV=1//0	mRNA	0.790534	1.13249	1.02322	1.64661	0.377933	0.619922	0.868653	0.616737	0.802541	1.0902	0.798487	2.43229	1.37433	1.61855	1.78421	0.32839	0.155399	0.399524	1.00359	1.30334	1.9411	1.67905	0.471077	0.911047
Ma05_t24390.3	Ma05_g24390	sp|A2YGR5|SPL12_ORYSI Squamosa promoter-binding-like protein 12 OS=Oryza sativa subsp. indica GN=SPL12 PE=2 SV=1//3.04712e-86	mRNA	0.870008	3.94319	1.75753	7.68538	2.39443	1.89914	3.4743	1.9028	1.97602	2.96874	3.06398	4.1372	1.46363	1.52567	3.02537	6.12093	6.90283	2.01686	2.77691	6.81381	2.56163	4.60837	2.30714	3.65926
Ma05_t24390.2	Ma05_g24390	sp|A2YGR5|SPL12_ORYSI Squamosa promoter-binding-like protein 12 OS=Oryza sativa subsp. indica GN=SPL12 PE=2 SV=1//3.04712e-86	mRNA	0.447478	1.15614	0.0129532	1.66488	1.28143	1.3303	1.47849	1.19514	1.11219	1.76113	3.96824	1.47636	1.07532	2.01077	1.03823	1.72445	3.54473	1.11933	1.40973	1.34573	1.00996	1.50679	0.000215211	1.71563
Ma05_t24390.1	Ma05_g24390	sp|A2YGR5|SPL12_ORYSI Squamosa promoter-binding-like protein 12 OS=Oryza sativa subsp. indica GN=SPL12 PE=2 SV=1//3.04712e-86	mRNA	7.65804	5.88332	5.22054	6.08159	5.91437	6.6235	5.15657	3.94717	7.93856	5.86845	5.3579	7.28137	10.8746	5.33125	5.74432	9.21363	5.51451	7.52602	7.30585	5.11139	7.63334	7.81234	4.47716	4.68229
Ma06_t09470.1	Ma06_g09470	sp|Q9C533|ZDHC1_ARATH Probable protein S-acyltransferase 22 OS=Arabidopsis thaliana GN=PAT22 PE=2 SV=2//0	mRNA	4.03659	7.6855	7.20886	11.8117	3.20745	3.87814	10.2112	3.56407	7.76255	5.97612	9.52026	1.93129	4.17885	5.83392	5.56276	2.74525	4.87749	2.27818	3.33746	5.47357	5.9622	6.85897	2.28362	6.99216
Ma08_t09210.1	Ma08_g09210	sp|Q5SMQ9|PIN1_ORYSJ Auxin efflux carrier component 1 OS=Oryza sativa subsp. japonica GN=PIN1 PE=2 SV=1//0	mRNA	1.17984	0.67382	1.73406	1.86277	1.26058	1.55568	1.73022	0.425341	1.44307	1.41133	1.23243	2.72683	1.13931	1.57622	1.64664	1.07005	1.64857	0.90816	3.21745	2.85317	3.0883	2.95192	0.527484	2.3071
Ma07_t10180.1	Ma07_g10180	sp|Q9SF47|PAH1_ARATH Phosphatidate phosphatase PAH1 OS=Arabidopsis thaliana GN=PAH1 PE=1 SV=1//0	mRNA	21.9511	21.1057	15.8696	20.6689	24.1308	26.1225	16.7506	46.566	17.2463	26.4973	18.4327	19.5122	20.5675	22.7335	22.5204	37.7651	36.6211	27.3148	20.7383	21.8854	17.6168	19.4727	38.4312	22.1319
Ma05_t24390.4	Ma05_g24390	sp|A2YGR5|SPL12_ORYSI Squamosa promoter-binding-like protein 12 OS=Oryza sativa subsp. indica GN=SPL12 PE=2 SV=1//3.04712e-86	mRNA	0.382875	0.000322006	1.24622e-24	0.292948	3.5801e-05	6.5966e-05	0.00024974	5.93588e-05	0.000160987	0.000186532	0.000253072	0.000209338	2.14561e-05	4.88633e-05	1.3474e-05	7.02498e-05	8.9949e-05	0.00970843	5.78047e-05	9.51497e-05	0.000280308	0.500543	4.51338e-08	0.332779
Ma02_t19890.1	Ma02_g19890	sp|Q5ZIJ9|MIB2_CHICK E3 ubiquitin-protein ligase MIB2 OS=Gallus gallus GN=MIB2 PE=2 SV=1//5.43191e-06	mRNA	0.101123	0	0	0.120897	0	0	0.40011	0	0.205153	0.276743	0	0.130224	0.115994	0	0	0	0.14598	0	0	0	0.130123	0.115513	0	0
Ma07_t05460.1	Ma07_g05460	sp|Q8L706|SYT5_ARATH Synaptotagmin-5 OS=Arabidopsis thaliana GN=SYT5 PE=2 SV=1//0	mRNA	39.5328	32.2596	33.3412	35.2633	34.2238	37.1193	34.779	38.563	35.1198	37.2865	39.9595	44.7572	49.569	36.8209	39.1829	30.2681	27.3155	36.4433	37.781	38.6168	39.5846	41.9106	32.9224	33.1736
Ma06_t08370.1	Ma06_g08370	-//-	mRNA	0	0	0	0	0	0	0	0	0	0	0	0	0	0	0	0	0	0	0	0	0	0	0	0
Ma09_t18440.1	Ma09_g18440	-//-	mRNA	1.7696	0.434475	1.66429	3.76921	2.24316	3.26907	0.386642	3.52063	1.49578	1.59102	2.15197	2.27382	1.28106	0.86149	1.60151	4.13471	2.52963	1.20658	1.41986	2.71144	1.80718	0.978583	1.68055	2.83599
Ma05_t08120.1	Ma05_g08120	sp|Q94KB9|MLO3_ARATH MLO-like protein 3 OS=Arabidopsis thaliana GN=MLO3 PE=2 SV=1//7.83113e-156	mRNA	1.11939	2.63207	3.19459	1.04781	1.28087	0.448062	2.60687	0.616971	3.33472	1.94452	3.00793	1.28455	2.88765	1.86001	2.04071	1.19284	0.1763	3.03608	0.606699	0.187822	0.543234	2.05714	0.617162	2.77364
Ma09_t13500.1	Ma09_g13500	sp|Q9LVC9|RLA32_ARATH 60S acidic ribosomal protein P3-2 OS=Arabidopsis thaliana GN=RPP3B PE=2 SV=1//6.04384e-17	mRNA	157.788	250.057	283.555	238.906	221.352	181.733	254.069	68.4792	150.084	213.641	234.376	301.01	120.894	92.7536	88.7893	135.839	102.013	201.032	254.831	226.267	247.785	180.38	87.8231	229.402
Ma04_t07130.1	Ma04_g07130	sp|F4HWY6|MYO11_ARATH Myosin-11 OS=Arabidopsis thaliana GN=XI-E PE=3 SV=1//0	mRNA	0.259656	0.383769	0.159388	0.656033	0.384362	0.371367	0.361708	0.0785594	0.423173	0.490296	0.600512	0.554208	0.427855	0.31369	0.452063	0.215316	0.436011	0.572941	0.273194	0.379859	0.55893	0.523893	0.120204	0.422394
Ma06_t35310.1	Ma06_g35310	sp|Q04980|LTI65_ARATH Low-temperature-induced 65 kDa protein OS=Arabidopsis thaliana GN=LTI65 PE=2 SV=2//2.0405e-06	mRNA	0.652168	0.248738	0.526334	0.942111	0.41679	0.385404	0.456403	0	0.155746	0.475085	0.313823	0.197577	0.583361	0.339181	0.362454	0.805942	0.888778	0.868583	0.636477	0.414421	0.451695	0.221569	0.224183	0.370973
Ma09_t29860.1	Ma09_g29860	sp|Q9FMU2|PP380_ARATH Pentatricopeptide repeat-containing protein At5g14080 OS=Arabidopsis thaliana GN=At5g14080 PE=2 SV=2//1.73029e-168	mRNA	1.14412	0.958615	0.994314	1.37806	1.3996	1.17359	0.989713	0.709044	1.04236	0.849498	1.1924	0.774266	1.24462	1.42582	1.12826	1.25825	1.78616	1.4993	1.24495	1.51736	0.946263	1.24215	1.5469	1.05055
Ma05_t18790.1	Ma05_g18790	sp|Q75VW3|DNAJ_HYDTT Chaperone protein DnaJ OS=Hydrogenobacter thermophilus (strain DSM 6534 / IAM 12695 / TK-6) GN=dnaJ PE=3 SV=1//3.45653e-10	mRNA	26.2737	17.6781	18.6244	10.5029	19.2101	18.556	14.2152	51.0058	14.4964	17.2548	16.1912	10.9347	15.1372	19.6929	22.0284	18.3208	17.5997	12.4342	10.5636	11.2426	7.67025	9.15964	37.7606	13.8317
Ma06_t34530.1	Ma06_g34530	-//-	mRNA	0.691773	1.64997	0.316874	0.865979	0.34163	1.20445	2.11961	1.09221	1.16909	0.624589	1.32451	1.78068	2.03693	1.30361	0.887323	3.23264	1.98547	1.90667	0.746507	1.06313	1.43568	1.54622	1.76147	2.47006
Ma04_t35380.1	Ma04_g35380	sp|O23140|AP2M_ARATH AP-2 complex subunit mu OS=Arabidopsis thaliana GN=AP2M PE=1 SV=1//0	mRNA	0.404129	0.791185	0.661828	1.07552	0.11902	0.551057	0.122195	0.996829	1.01982	0.454339	0.965145	0.530212	0.702394	0.297763	0.515641	0.641377	0.340528	0.200287	0.734448	0.444511	0.995378	0.373498	0.404341	0.436914
Ma08_t17510.1	Ma08_g17510	sp|Q8LJW3|ACR4_ARATH ACT domain-containing protein ACR4 OS=Arabidopsis thaliana GN=ACR4 PE=2 SV=1//9.71742e-165	mRNA	5.47989	5.63738	7.31123	6.34423	12.5428	11.0616	3.28287	2.37821	6.02636	3.74903	5.11805	5.16359	4.20485	6.05503	5.38251	11.4008	9.26558	9.802	7.72663	5.94644	11.2245	5.10839	3.02276	6.39279
Ma04_t35380.2	Ma04_g35380	sp|O23140|AP2M_ARATH AP-2 complex subunit mu OS=Arabidopsis thaliana GN=AP2M PE=1 SV=1//0	mRNA	9.12274	13.7007	15.162	12.3036	12.496	12.3911	13.5816	15.0377	12.0402	13.8116	15.529	14.9739	9.50047	13.6809	12.5354	12.9562	10.9891	13.9173	9.48485	10.4347	12.2754	12.8356	11.7211	13.4366
Ma06_t04610.1	Ma06_g04610	-//-	mRNA	2.06167	4.37425	3.28175	7.77567	8.4144	10.2965	5.79642	3.39186	3.71154	7.48516	8.03946	14.901	5.70623	3.15868	1.9394	7.80125	4.80834	11.6253	12.0933	9.94992	7.51326	7.56728	1.93728	9.0592
Ma01_t03630.1	Ma01_g03630	-//-	mRNA	13.0134	10.5126	10.9052	10.3016	11.4822	14.9045	11.1543	23.5717	11.385	8.99625	8.27939	7.74342	14.1457	13.4678	17.1906	17.7983	24.5969	16.9699	9.03952	9.41697	9.31046	9.72121	23.2238	11.7175
Ma06_t04730.1	Ma06_g04730	-//-	mRNA	0.0653525	0.221959	1.44258	0.419085	6.42013e-06	0.367676	4.36264e-06	6.48824e-05	1.78276e-06	0.148842	0.189191	1.25585e-05	0.207779	1.32872e-06	0.090554	0.422326	0.513524	0.207816	0.370511	1.8634e-05	0.147995	1.86719e-06	0.739485	3.83571e-06
Ma06_t30210.2	Ma06_g30210	-//-	mRNA	2.02645	2.18855	2.11612e-05	0.767647	0.564476	3.75195e-05	1.63972	4.20523	1.52535	2.54815	1.34325	0.287366	0.920937	1.1902	1.04477	0.673383	0.528358	0.834104	0.34026	0.264627	0.165807	0.310396	1.00001	0.652897
Ma11_t24500.1	Ma11_g24500	sp|Q9ZUW3|PP172_ARATH Pentatricopeptide repeat-containing protein At2g27610 OS=Arabidopsis thaliana GN=PCMP-H60 PE=2 SV=1//0	mRNA	1.94003	2.48966	2.91604	3.08758	2.87897	3.21586	2.8079	0.876466	2.61146	2.37784	2.78831	2.77639	1.70778	2.36654	2.33133	2.24395	2.95134	2.80563	2.88491	2.7951	2.52401	2.43398	1.76023	2.52489
Ma06_t30210.1	Ma06_g30210	-//-	mRNA	20.4986	33.4005	19.2196	43.4011	13.0491	15.5467	30.9819	27.4913	33.9243	32.307	24.3827	38.3542	29.832	17.3489	18.1272	17.2266	18.4232	17.313	21.0215	21.1987	34.8566	44.0682	14.9218	24.3096
Ma09_t30530.2	Ma09_g30530	-//-	mRNA	1.82796	2.03252	2.54765	2.02849	2.053	2.85193	1.6479	3.89248	2.2019	1.07309	1.50276	0.98018	0.911179	3.2525	2.93287	2.83286	2.68835	1.5178	2.16619	1.78621	1.56228	1.81992	3.4381	1.86301
Ma09_t30530.3	Ma09_g30530	-//-	mRNA	0.456327	0.222991	0.1515	0.234853	0.4162	0.551109	8.72365e-07	0.252904	0.218887	0.301305	0.11231	0.367749	0.117736	0.261413	0.363592	0.134025	0.546283	0.112531	2.68309e-07	0.0590695	0.147341	3.73249e-07	0.782627	0.645823
Ma01_t10230.1	Ma01_g10230	sp|Q9XF61|PDI_DATGL Protein disulfide-isomerase OS=Datisca glomerata GN=PDI PE=2 SV=1//0	mRNA	430.237	288.048	370.68	240.62	228.436	242.544	408.616	353.596	363.317	325.673	407.668	271.185	435.652	375.151	401.376	250.859	228.2	397.669	263.856	252.273	293.46	314.479	408.021	254.139
Ma09_t30530.1	Ma09_g30530	-//-	mRNA	4.06207e-07	0.854727	1.50948	0.640443	1.0161	0.228152	0.437467	0.923256	0.000103777	1.13071	0.371305	2.01004	3.73779e-11	5.0633e-05	8.00666e-13	1.47021	0.525852	1.02385	1.46654	0.616261	1.34928	1.0654	1.96858	0.00523021
Ma09_t30530.6	Ma09_g30530	-//-	mRNA	0.181789	0.0839217	2.9701e-05	7.05587e-07	0.0867178	2.15719e-08	0.21323	0.334787	0.129433	9.77248e-07	5.013e-06	0.0769233	1.64887e-21	0.171378	4.90892e-18	1.31573e-08	5.76424e-07	1.31244e-06	7.85142e-08	2.13476e-10	0.0754612	0.068347	0.125215	6.32785e-29
Ma10_t12240.4	Ma10_g12240	sp|F1SWA0|ZERSY_ZINZE Zerumbone synthase OS=Zingiber zerumbet GN=ZSD1 PE=1 SV=1//9.57705e-55	mRNA	2.9949e-06	3.60004e-07	0	0.000385321	0.171453	8.67833e-07	2.51605e-09	7.33902e-06	4.70754e-07	1.66119e-05	1.14207e-05	0.000611993	6.50939e-05	1.00389e-11	0.00276232	7.87516e-07	5.66428e-06	0.000103496	0.39858	5.96967e-05	0.000759376	6.53315e-05	1.79409e-05	2.1243e-08
Ma09_t30530.4	Ma09_g30530	-//-	mRNA	8.47847e-06	3.34857e-11	1.60455e-10	1.97004e-06	4.77638e-06	2.62368e-08	2.15192e-06	6.21785e-06	1.39139e-11	3.96983e-08	1.50483e-07	3.444e-06	1.62234e-05	2.16637e-08	1.01586e-06	1.89717e-08	2.30502e-06	7.19084e-07	4.13756e-07	6.7337e-09	5.78995e-08	1.6074e-06	3.19501e-06	1.52508e-24
Ma09_t30530.5	Ma09_g30530	-//-	mRNA	0.594311	2.74757e-05	0.131208	0.333841	0.253885	0.140859	0.221637	0.472517	0.511559	9.613e-06	0.263437	0.111935	0.955522	0.723858	0.299723	4.76781e-06	0.196492	0.0859571	3.88811e-06	6.22485e-06	3.06858e-06	0.0890138	0.287812	0.232291
Ma08_t12010.1	Ma08_g12010	sp|P92949|FRO2_ARATH Ferric reduction oxidase 2 OS=Arabidopsis thaliana GN=FRO2 PE=1 SV=2//0	mRNA	0	0	0	0	0	0	0	0	0	0	0	0	0	0	0.0779613	0	0	0	0	0.0234612	0	0	0	0
Ma11_t03020.1	Ma11_g03020	sp|Q6ZBH6|PCF2_ORYSJ Transcription factor PCF2 OS=Oryza sativa subsp. japonica GN=PCF2 PE=1 SV=1//9.93105e-34	mRNA	2.91347	7.16027	6.02296	7.76241	8.08268	5.25779	5.8836	1.78953	4.10115	5.30074	6.19193	7.67705	3.77118	3.66483	3.20201	4.01235	3.43433	4.65698	6.46078	8.30607	6.02723	5.33543	2.35059	5.92701
Ma06_t04600.2	Ma06_g04600	sp|C5H8J1|EME1B_ARATH Crossover junction endonuclease EME1B OS=Arabidopsis thaliana GN=EME1B PE=1 SV=1//5.10908e-136	mRNA	1.86111e-06	0.00258062	4.00566e-07	0.00243461	1.7121e-05	0.000241147	2.46393e-05	4.10085e-05	6.77639e-05	2.29924e-05	1.95524e-05	9.0495e-06	3.97368e-06	7.2233e-05	1.51871e-05	7.24528e-05	1.64855e-05	1.75546e-06	3.13937e-05	6.32843e-05	2.03148e-06	2.29854e-05	0.00421277	0.000101215
Ma06_t04600.3	Ma06_g04600	sp|C5H8J1|EME1B_ARATH Crossover junction endonuclease EME1B OS=Arabidopsis thaliana GN=EME1B PE=1 SV=1//5.10908e-136	mRNA	3.23918e-06	0.0483083	5.27905e-07	0.708735	6.45308e-05	0.00503575	0.000125876	0.49242	0.442335	0.000104347	9.00407e-05	2.83468e-05	8.37683e-06	0.512918	8.32255e-05	0.00055346	5.48954e-05	2.80112e-06	0.000157642	0.000993457	3.47465e-06	0.527419	0.157636	0.00386748
Ma06_t04600.1	Ma06_g04600	sp|C5H8J1|EME1B_ARATH Crossover junction endonuclease EME1B OS=Arabidopsis thaliana GN=EME1B PE=1 SV=1//5.10908e-136	mRNA	0.49502	0.41168	0.695101	2.48798e-15	0.459213	0.403237	0.519233	0.594637	0.568497	0.517599	0.740434	1.27461	0.623132	0.451412	0.771995	0.417769	0.470038	0.508724	0.652989	0.789617	1.30261	0.311625	0.646446	0.689898
Ma01_t05370.1	Ma01_g05370	sp|Q9FH28|DNJ49_ARATH Chaperone protein dnaJ 49 OS=Arabidopsis thaliana GN=ATJ49 PE=2 SV=2//6.02524e-11	mRNA	34.1457	27.0326	38.893	18.9597	24.1081	21.5386	29.0909	51.5432	26.927	27.9196	24.4418	15.8957	24.2452	27.8883	28.2611	26.3424	23.6257	24.3042	18.1282	18.2864	16.1586	16.39	35.0578	20.9602
Ma06_t03270.1	Ma06_g03270	-//-	mRNA	0	0	0	0	0	0	0.0697925	0	0	0.036348	0	0	0.0619652	0.0331029	0.082124	0	0.0382309	0	0.0876946	0	0.0346319	0.0916387	0	0
Ma01_t20760.4	Ma01_g20760	sp|Q9CAA9|BH049_ARATH Transcription factor bHLH49 OS=Arabidopsis thaliana GN=BHLH49 PE=1 SV=1//2.2965e-44	mRNA	5.47092e-09	4.83227e-07	1.82808e-09	0.000129154	1.28056e-05	0.000150471	6.43252e-07	3.92145e-08	9.55416e-06	2.30717e-06	3.34842e-07	2.33715e-05	3.91029e-06	1.23803e-07	3.80606e-07	6.85463e-07	0.184219	4.73063e-06	4.69772e-07	6.28783e-07	2.59638e-08	4.37903e-06	4.75185e-07	5.42678e-18
Ma04_t25720.1	Ma04_g25720	-//-	mRNA	0	0.254882	0.245032	0.224577	0	0	0.239919	0	0.369956	0	0	0.234918	0	0	0	0	0	0.253192	0.297153	0	0	0	0	0
Ma03_t26830.1	Ma03_g26830	sp|Q67XX3|FB252_ARATH F-box protein At5g06550 OS=Arabidopsis thaliana GN=At5g06550 PE=2 SV=1//0	mRNA	2.42411	1.9728	3.69504	1.92495	2.01386	1.45358	3.60729	1.67524	1.94811	2.47789	2.46684	2.05464	0.950602	2.09603	1.68721	1.16703	1.84441	1.9773	1.78049	2.21421	2.44318	1.59192	2.40508	1.93471
Ma04_t37600.1	Ma04_g37600	sp|Q9SLC3|ATL41_ARATH E3 ubiquitin-protein ligase ATL41 OS=Arabidopsis thaliana GN=ATL41 PE=1 SV=1//8.88362e-22	mRNA	2.2604	0.424362	0.489806	0.914642	1.06488	1.14059	0.511749	6.73556	0.589796	1.68452	0.354683	0.0831616	0.599416	0.414049	0.278464	1.1307	2.80186	0.63746	0.640725	1.49422	0.503433	0.51977	1.37989	1.10842
Ma09_t29470.1	Ma09_g29470	sp|Q9SUE3|CRF4_ARATH Ethylene-responsive transcription factor CRF4 OS=Arabidopsis thaliana GN=CRF4 PE=1 SV=2//3.77853e-26	mRNA	0.272832	0.134893	0.337329	0.439115	0.424249	0.35559	0.138799	0.0483508	0.0852175	0.260307	0.0569641	0.351265	0.148103	0.288726	0.108285	0.0734821	0.304146	0.20838	0.453674	0.485989	0.579264	0.364774	0.122876	0.351897
Ma08_t07810.2	Ma08_g07810	sp|Q6ICX4|PTBP3_ARATH Polypyrimidine tract-binding protein homolog 3 OS=Arabidopsis thaliana GN=At1g43190 PE=2 SV=1//0	mRNA	24.9285	29.2078	27.5303	26.6841	26.4109	27.9975	27.2694	30.2406	32.9352	25.7452	31.3034	28.1953	28.7276	31.8842	36.1614	28.1892	34.226	36.4635	21.6333	23.4948	23.2962	23.8346	33.7089	28.0223
Ma10_t10980.1	Ma10_g10980	sp|Q70DU8|AL3H1_ARATH Aldehyde dehydrogenase family 3 member H1 OS=Arabidopsis thaliana GN=ALDH3H1 PE=1 SV=2//0	mRNA	6.506	7.93173	5.11183	3.17139	6.84455	6.87474	5.5242	14.0701	6.24218	3.70215	6.43694	4.53942	5.9488	7.42814	6.69204	6.83383	10.3714	5.41789	4.01327	3.85552	3.2825	3.08842	14.0897	5.0271
Ma03_t09810.1	Ma03_g09810	sp|Q9FLB1|PYL5_ARATH Abscisic acid receptor PYL5 OS=Arabidopsis thaliana GN=PYL5 PE=1 SV=1//1.62853e-62	mRNA	0.574088	3.544	1.1144	1.10389	0.713144	0.758961	1.58597	8.21108	0.688527	4.37521	1.21411	2.01602	0.182351	0.199327	0.277765	2.01016	6.41911	0.663429	2.07441	3.05973	1.22449	0.420958	2.43621	1.52529
Ma08_t23640.1	Ma08_g23640	sp|F4I1S7|ELP2_ARATH Elongator complex protein 2 OS=Arabidopsis thaliana GN=ELP2 PE=1 SV=1//0	mRNA	7.18002	10.0115	9.11014	11.9972	9.69964	10.2476	11.3445	3.12626	7.56268	9.37009	13.0026	10.0279	7.99976	8.61243	7.54619	12.549	10.0704	13.2913	13.338	12.714	12.763	11.0389	6.36123	10.1627
Ma04_t11540.1	Ma04_g11540	sp|A1KR91|DNAJ_NEIMF Chaperone protein DnaJ OS=Neisseria meningitidis serogroup C / serotype 2a (strain ATCC 700532 / DSM 15464 / FAM18) GN=dnaJ PE=3 SV=1//3.16152e-75	mRNA	91.8318	70.4983	82.9279	75.879	74.0536	86.9401	71.0304	55.3053	85.02	65.0581	72.6104	68.0774	90.1423	85.682	103.992	84.4312	70.5861	82.7133	80.2128	72.7811	67.1018	83.1283	68.4664	72.1963
Ma11_t06350.1	Ma11_g06350	sp|Q9LE59|GAUT1_ARATH Polygalacturonate 4-alpha-galacturonosyltransferase OS=Arabidopsis thaliana GN=GAUT1 PE=1 SV=1//3.30321e-20	mRNA	38.0252	43.4513	0	0	45.7815	0	0	0	0	0	0	15.7807	0	70.8829	83.0137	0	0	0	0	0	0	24.4082	0	0
Ma10_t11630.1	Ma10_g11630	-//-	mRNA	0.806843	0.576033	1.41029	2.26606	1.31604	1.6242	1.06648	0.559127	0.614171	1.22102	1.15566	0.779146	1.46195	1.32631	0.509209	1.34192	1.63545	1.65509	3.07806	2.73922	2.37375	1.44409	0.62853	1.02513
Ma09_t14960.2	Ma09_g14960	sp|Q6EP49|MAD27_ORYSJ MADS-box transcription factor 27 OS=Oryza sativa subsp. japonica GN=MADS27 PE=2 SV=2//5.76018e-83	mRNA	0.205535	2.57031	3.06772	1.50502	1.94293	1.24764	2.08844	2.11781	3.38161	2.93251	0.00449966	3.26401	2.26961	2.54978	3.18164	1.44728	3.40481	0.362872	2.49938	2.49293	3.22675	3.05635	3.9345	0.0526063
Ma09_t14960.1	Ma09_g14960	sp|Q6EP49|MAD27_ORYSJ MADS-box transcription factor 27 OS=Oryza sativa subsp. japonica GN=MADS27 PE=2 SV=2//5.76018e-83	mRNA	1.96429	0.000347324	4.61234e-05	2.36049	0.00156527	1.72193	5.5595e-05	0.00280825	1.03769	9.85334e-05	1.81579	5.0252e-05	0.38949	0.000151175	0.430194	2.0542	0.000224474	2.81196	0.000342173	0.00189461	1.55479	0.000199656	0.00237166	2.17137
Ma02_t22530.4	Ma02_g22530	sp|Q8BGE5|FANCM_MOUSE Fanconi anemia group M protein homolog OS=Mus musculus GN=Fancm PE=1 SV=3//6.84536e-136	mRNA	0.000502723	1.06425e-05	4.48855e-05	0.207308	0.468474	3.94263e-05	2.5132e-05	0.204091	0.000156467	0.268885	0.347062	2.34042e-06	0.172711	0.365576	0.348313	0.395567	0.522001	0.183301	2.68028e-06	0.372062	0.000109682	2.11821e-05	0.383228	9.93777e-06
Ma02_t22530.1	Ma02_g22530	sp|Q8BGE5|FANCM_MOUSE Fanconi anemia group M protein homolog OS=Mus musculus GN=Fancm PE=1 SV=3//6.84536e-136	mRNA	4.19499	4.73016	4.05939	5.17121	5.18509	5.14399	3.35791	5.98831	4.60983	4.59742	3.97968	3.80692	4.47054	4.46849	3.95057	5.99494	7.69189	5.94526	3.96536	4.14409	5.19501	4.95011	6.27669	4.02974
Ma02_t22530.2	Ma02_g22530	sp|Q8BGE5|FANCM_MOUSE Fanconi anemia group M protein homolog OS=Mus musculus GN=Fancm PE=1 SV=3//6.84536e-136	mRNA	6.28358e-52	0.329648	0.724366	0.593177	0.176614	0.0924037	2.96562e-05	0.346751	0.12439	2.41091e-05	0.0049566	0.114425	2.69357e-54	4.94697e-07	0.104073	6.05336e-05	2.01829e-05	2.74896e-05	0.0648041	0.296913	1.78352e-05	0.276907	2.71284e-05	0.229853
Ma02_t22530.3	Ma02_g22530	sp|Q8BGE5|FANCM_MOUSE Fanconi anemia group M protein homolog OS=Mus musculus GN=Fancm PE=1 SV=3//6.84536e-136	mRNA	1.08526	0.105112	4.79236e-09	0.203751	1.2447e-06	0.127243	0.301002	1.55499	4.96413e-07	0.235142	0.328266	0.235042	0.172622	0.353141	0.979396	0.269027	0.493877	0.276008	0.109192	2.84329e-06	2.84141e-08	0.13485	0.448392	0.243257
Ma04_t11550.1	Ma04_g11550	sp|Q9C6S5|PHSB_ARATH Probable polyamine transporter At1g31830 OS=Arabidopsis thaliana GN=At1g31830 PE=2 SV=1//0	mRNA	35.6142	33.8231	39.9214	30.0481	32.6572	38.6766	28.5644	36.1574	29.6728	24.4727	30.4518	28.2708	28.0427	31.1374	34.9315	28.5746	33.0823	25.1031	27.7487	25.635	21.006	23.7383	33.0009	29.069
Ma00_t04560.1	Ma00_g04560	-//-	mRNA	0	0	0	0	0	0	0	0	0	0	0	0	0	0	0	0	0	0	0	0	0	0	0	0
Ma07_t05080.1	Ma07_g05080	-//-	mRNA	31.4591	27.8035	25.9698	24.6646	27.4351	30.8313	23.7847	40.2134	26.117	25.0241	27.0666	24.363	31.7257	27.0325	27.5911	35.8363	28.2385	24.5298	26.5772	28.4842	23.1327	25.9677	33.8421	27.1801
Ma05_t25150.1	Ma05_g25150	sp|Q9M2Y9|RAX3_ARATH Transcription factor RAX3 OS=Arabidopsis thaliana GN=RAX3 PE=2 SV=1//2.87305e-71	mRNA	5.32508	2.95896	3.79467	4.40307	6.09443	8.89525	4.72635	3.33768	6.29266	2.51229	1.3482	1.90998	6.85246	4.70723	4.67027	4.59472	2.80891	2.26072	5.61666	4.87205	2.43851	3.64695	3.26014	5.42433
Ma03_t30610.1	Ma03_g30610	sp|Q3ECH2|Y1670_ARATH Probable receptor-like protein kinase At1g67000 OS=Arabidopsis thaliana GN=At1g67000 PE=2 SV=2//2.69204e-112	mRNA	0	0.0490364	0	0.0221769	0.0514135	0	0.0505075	0.0439715	0.0581404	0.0263146	0.12948	0.0245793	0.0449347	0.0238511	0.0393283	0.100265	0.110678	0.0270864	0	0.0294735	0.0502097	0.0221289	0	0
Ma09_t27870.1	Ma09_g27870	sp|Q652V8|HSP16_ORYSJ 16.0 kDa heat shock protein, peroxisomal OS=Oryza sativa subsp. japonica GN=HSP16.0 PE=2 SV=1//1.34926e-42	mRNA	30.2057	50.237	36.736	32.8104	40.2251	35.5063	35.0834	33.8346	32.267	34.5677	37.6326	38.8356	27.4428	28.5538	29.2844	50.6429	46.2146	42.4609	39.9156	38.7845	33.8693	37.8069	41.9766	46.3008
Ma09_t10760.1	Ma09_g10760	sp|Q9SBA7|STP8_ARATH Sugar transport protein 8 OS=Arabidopsis thaliana GN=STP8 PE=2 SV=2//0	mRNA	0.397225	0.198685	0	0.153968	0.297542	0.0623804	0.321073	1.16952	0.0896059	0.699426	0.239661	0.198886	0.129732	0.0828499	0.0227967	0.270435	0.191877	0.156486	0.220142	0.102202	0.376953	0.0511317	0.301442	0.158672
Ma05_t05500.1	Ma05_g05500	sp|Q6NRL0|PRXD1_XENLA Prolyl-tRNA synthetase associated domain-containing protein 1 OS=Xenopus laevis GN=prorsd1p PE=2 SV=1//3.53772e-32	mRNA	35.1909	30.506	24.1061	16.6105	14.9617	19.7256	33.6587	40.8233	20.5443	27.9513	38.1541	28.403	25.7924	30.6076	30.4121	14.9257	17.2282	25.499	21.9051	20.3854	25.4743	28.3252	32.4232	25.8743
Ma04_t10690.1	Ma04_g10690	sp|Q93794|SEL10_CAEEL F-box/WD repeat-containing protein sel-10 OS=Caenorhabditis elegans GN=sel-10 PE=1 SV=3//7.90499e-06	mRNA	0.0839484	0.296766	0	0.317139	0.141416	0.296325	0.0555196	0.0483508	0.213044	0.462768	0.0854461	0.540408	0.148103	0.0262478	0.108285	0.477633	0.121658	0.0595372	0.488572	0.421191	0.082752	0.0729547	0.0409585	0.251355
Ma05_t29550.1	Ma05_g29550	sp|O23337|PP311_ARATH Pentatricopeptide repeat-containing protein At4g14820 OS=Arabidopsis thaliana GN=PCMP-H3 PE=2 SV=1//4.71435e-21	mRNA	0.550899	0.717119	0.402353	0.699758	0.875775	0.929056	0.788701	0.212252	0.885241	0.883782	1.06619	0.650221	0.589303	0.815293	0.679821	0.723354	0.664498	0.648973	0.760921	0.850042	0.479515	0.688457	0.446761	0.612882
Ma02_t01150.1	Ma02_g01150	sp|Q9SAK5|APL_ARATH Myb family transcription factor APL OS=Arabidopsis thaliana GN=APL PE=2 SV=2//3.84973e-34	mRNA	2.52197e-06	2.80249e-05	5.33594e-05	1.64709e-05	2.62791e-05	0.291021	0.979318	0.000322207	0.12441	0.974672	1.26086e-05	2.98887e-05	8.02678e-06	0.131015	6.94048e-06	0.311469	3.21515e-05	0.365612	0.389589	5.15472e-05	0.590326	1.11873e-05	0.000119149	0.421544
Ma02_t01150.2	Ma02_g01150	sp|Q9SAK5|APL_ARATH Myb family transcription factor APL OS=Arabidopsis thaliana GN=APL PE=2 SV=2//3.84973e-34	mRNA	3.86489	3.19139	2.96083	3.90674	4.52978	2.7857	5.45409	0.961046	9.37356	8.26917	10.4929	10.1781	4.02786	2.06928	2.26822	3.03772	3.53226	8.14205	3.34021	4.91545	5.3624	4.1977	1.19974	3.37393
Ma06_t07750.1	Ma06_g07750	sp|Q9C7E8|COL15_ARATH Zinc finger protein CONSTANS-LIKE 15 OS=Arabidopsis thaliana GN=COL15 PE=2 SV=1//5.55099e-31	mRNA	8.73798	10.355	6.25557	10.7543	10.2569	9.6239	3.69599	2.14628	8.57732	4.79799	2.98061	5.51078	9.02168	7.1609	7.79019	12.3853	13.8836	8.24046	5.34643	4.75885	6.78949	5.83214	4.1978	6.9103
Ma10_t24180.4	Ma10_g24180	-//-	mRNA	0.644367	0.0640443	0.575031	0.664232	0.495084	0.362296	0.776171	0.316469	0.230007	0.338318	0.403556	0.418052	0.469491	0.397701	0.16281	0.39135	0.234199	0.477375	0.621912	0.879689	0.38089	0.749207	0.903277	0.56477
Ma11_t23500.4	Ma11_g23500	sp|Q9C977|PP135_ARATH Pentatricopeptide repeat-containing protein At1g80270, mitochondrial OS=Arabidopsis thaliana GN=At1g80270 PE=2 SV=1//6.9415e-180	mRNA	1.28464e-09	0.878157	8.51087e-17	0.93921	1.48492	0.800392	0.873451	0.458823	0.269938	1.35215e-05	1.23003	0.535414	8.73582e-09	0.277546	4.69322e-21	3.32176e-06	8.11843e-06	0.902419	1.40337	0.990638	1.22501	0.238869	0.346277	0.253929
Ma11_t23500.5	Ma11_g23500	sp|Q9C977|PP135_ARATH Pentatricopeptide repeat-containing protein At1g80270, mitochondrial OS=Arabidopsis thaliana GN=At1g80270 PE=2 SV=1//6.9415e-180	mRNA	2.55377	1.36019	0.000330592	1.37136	4.71487	3.34138	2.83722	1.90934	2.57664	2.51915	0.951087	2.67275	5.09659	1.94683	5.04418	2.70567	3.20754	3.3741	1.92396	1.9988	3.11708	1.62029	0.114081	0.719571
Ma11_t23500.2	Ma11_g23500	sp|Q9C977|PP135_ARATH Pentatricopeptide repeat-containing protein At1g80270, mitochondrial OS=Arabidopsis thaliana GN=At1g80270 PE=2 SV=1//6.9415e-180	mRNA	0.000293523	2.64889e-09	0.504903	0.900095	1.00192	0.000104269	0.000171929	0.845682	1.35433	0.255992	4.08773e-05	1.3099	0.000278584	0.57258	1.01761	1.51495	2.19767	1.06399	0.693511	0.000170887	0.426774	3.09951e-05	1.16755	0.998671
Ma11_t23500.3	Ma11_g23500	sp|Q9C977|PP135_ARATH Pentatricopeptide repeat-containing protein At1g80270, mitochondrial OS=Arabidopsis thaliana GN=At1g80270 PE=2 SV=1//6.9415e-180	mRNA	2.32746	2.66212	4.17893	1.71435	1.91469	2.21459	1.29063	1.41778	1.86264	1.5865	0.802564	1.44466	1.43157	2.46268	3.19649	3.25549	0.960566	2.29125	0.678588	1.52957	1.58322	1.72256	0.332986	1.05395
Ma11_t23500.1	Ma11_g23500	sp|Q9C977|PP135_ARATH Pentatricopeptide repeat-containing protein At1g80270, mitochondrial OS=Arabidopsis thaliana GN=At1g80270 PE=2 SV=1//6.9415e-180	mRNA	2.41546	2.46542	3.75031	4.51971	0.00150855	3.58592	2.10567	0.757999	1.88238	1.62524	3.83484	1.43679	1.49107	3.73641	0.440901	1.78062	3.68341	1.35821	1.33553	1.82757	1.67904	4.42186	5.79281	3.96768
Ma10_t28490.1	Ma10_g28490	sp|Q7M1E7|PGLR2_CHAOB Polygalacturonase OS=Chamaecyparis obtusa PE=1 SV=1//5.72577e-75	mRNA	0.0354496	0	0	0	0	0	0	0	0	0	0	0	0	0	0	0	0	0	0	0	0	0	0	0
Ma04_t00120.1	Ma04_g00120	sp|Q8H2J9|GPDA_ORYSJ Glycerol-3-phosphate dehydrogenase [NAD(+)], chloroplastic OS=Oryza sativa subsp. japonica GN=Os07g0229800 PE=2 SV=3//0	mRNA	1.92271	1.90122	1.59358	1.98946	2.39194	2.4466	1.65615	2.17972	2.25204	1.82284	2.02135	1.91747	1.56367	1.93728	1.68314	1.9974	1.30246	1.99996	1.75659	1.46776	1.77721	1.63157	1.8143	1.89801
Ma04_t00120.2	Ma04_g00120	sp|Q8H2J9|GPDA_ORYSJ Glycerol-3-phosphate dehydrogenase [NAD(+)], chloroplastic OS=Oryza sativa subsp. japonica GN=Os07g0229800 PE=2 SV=3//0	mRNA	1.93624e-05	0.00018046	7.15926e-05	8.30334e-06	5.42622e-05	6.25529e-06	0.629569	1.02334	2.60447e-05	0.24225	0.610986	0.579718	0.124921	0.201403	0.190377	1.52071e-05	0.529723	0.304785	6.6422e-05	5.02794e-05	2.07978e-05	0.129901	2.18687e-05	3.14155e-05
Ma01_t18940.1	Ma01_g18940	sp|Q9FKL6|CB60B_ARATH Calmodulin-binding protein 60 B OS=Arabidopsis thaliana GN=CBP60B PE=2 SV=1//0	mRNA	19.7892	7.51832	22.4403	9.45528	12.389	13.2473	21.1243	26.5461	21.5287	12.6373	14.526	6.23344	31.7997	17.8143	17.8836	13.1705	8.8251	15.7248	5.39829	6.22068	5.05261	8.37768	15.9698	8.9363
Ma01_t18940.2	Ma01_g18940	sp|Q9FKL6|CB60B_ARATH Calmodulin-binding protein 60 B OS=Arabidopsis thaliana GN=CBP60B PE=2 SV=1//0	mRNA	6.23278	3.32585	6.30311	1.75653	3.63402	3.74349	6.19753	5.63083	8.50846	1.86936	3.39552	1.59609	6.10836	6.51046	8.79666	1.08249	3.0862	2.4854	1.9463	1.48529	1.67755	3.31274	3.75707	2.8794
Ma06_t07740.2	Ma06_g07740	-//-	mRNA	2.18274e-05	3.70768e-05	3.01031e-06	0.0846512	0.212732	0.414704	7.54203e-05	0	1.18081e-05	0.300936	0.125444	4.68227e-05	0.222828	7.67871e-06	0.251213	0.275435	8.00481e-05	0.314083	2.0239e-06	1.12131e-05	0.243528	0.533431	1.47708e-06	0.201992
Ma07_t10610.2	Ma07_g10610	sp|Q9FH37|ILR3_ARATH Transcription factor ILR3 OS=Arabidopsis thaliana GN=ILR3 PE=1 SV=1//1.01587e-50	mRNA	3.48184	5.62056	4.59442	14.5286	5.72869	5.89293	4.77584	7.15315	8.75748	7.47869	8.86476	8.45579	6.54164	4.72217	4.70418	8.07913	11.6757	5.05154	6.62962	6.06965	8.58108	6.58969	4.18294	3.8616
Ma07_t10610.1	Ma07_g10610	sp|Q9FH37|ILR3_ARATH Transcription factor ILR3 OS=Arabidopsis thaliana GN=ILR3 PE=1 SV=1//1.01587e-50	mRNA	2.27251	4.85243	2.78194	6.45566	3.73453	4.3501	3.22446	1.81625	4.68971	4.73486	4.13403	4.40968	3.35851	2.2172	3.18452	6.55432	4.53526	3.84266	3.0144	4.21682	5.52062	3.29956	3.67506	3.25959
Ma06_t07740.1	Ma06_g07740	-//-	mRNA	0.481908	0.438887	0.527699	0.351487	0.149015	0.585759	0.262341	0	0.805699	0.347144	5.15584e-05	0.693442	0.293357	0.961267	0.593967	0.192699	0.574884	0.51371	1.08317	1.26896	0.965277	1.28624e-05	0.331686	0.291178
Ma10_t24180.1	Ma10_g24180	-//-	mRNA	0.65614	0.712465	0.397158	0.335716	0.286292	1.02634	0.457759	0.160687	0.524152	0.410471	0.544118	0.775773	0.952951	0.6038	0.287515	0.594472	0.71112	0.482538	1.25884	0.267309	0.641696	0.757609	0.414475	0.500833
Ma09_t06640.1	Ma09_g06640	sp|P27495|CB24_TOBAC Chlorophyll a-b binding protein 40, chloroplastic OS=Nicotiana tabacum GN=CAB40 PE=2 SV=1//4.21468e-177	mRNA	0	0	0	0	0.0536376	0.113432	0	0	0	0.108629	0	0.457455	0	0	0.0414878	0.207335	0.114316	0	0.196458	0.121841	0.10326	0	0	0
Ma05_t02430.1	Ma05_g02430	sp|Q9C757|INT2_ARATH Probable inositol transporter 2 OS=Arabidopsis thaliana GN=INT2 PE=1 SV=1//0	mRNA	22.6357	19.6764	20.0245	12.5316	10.7659	12.4153	13.1702	16.3743	9.75857	8.10263	13.7992	9.39797	10.089	23.779	20.6987	11.4291	13.9585	10.6999	15.451	13.4656	9.22076	10.7093	16.9284	11.4282
Ma04_t05940.1	Ma04_g05940	sp|Q9LJG8|ASIL2_ARATH Trihelix transcription factor ASIL2 OS=Arabidopsis thaliana GN=ASIL2 PE=2 SV=1//5.56487e-11	mRNA	4.5234	6.00259	4.13705	8.30336	5.81275	5.10881	4.09102	1.03232	6.51778	6.85358	6.62697	9.17227	5.68716	4.07538	5.18566	7.84201	5.11564	5.30573	8.79642	9.65068	6.28617	7.39083	2.73523	6.41469
Ma04_t05940.2	Ma04_g05940	sp|Q9LJG8|ASIL2_ARATH Trihelix transcription factor ASIL2 OS=Arabidopsis thaliana GN=ASIL2 PE=2 SV=1//5.56487e-11	mRNA	0.590709	0.856068	0.439406	0.730152	0.703235	0.83564	0.749173	0.787091	0.575991	0.941482	0.494869	0.920356	1.489	0.991397	1.22541	0.34012	0.548247	0.675128	0.868348	0.884185	1.05971	0.790595	0.536839	1.32171
Ma00_t00710.1	Ma00_g00710	-//-	mRNA	0	0	0	0	0	0	0	0	0	0	0	0	0	0	0	0	0	0	0	0	0	0	0	0
Ma00_t02070.1	Ma00_g02070	sp|Q9SZA4|CDC21_ARATH Cell division cycle 20.1, cofactor of APC complex OS=Arabidopsis thaliana GN=CDC20-1 PE=1 SV=1//8.87603e-76	mRNA	17.9862	27.3503	25.6021	37.2239	37.8796	39.6081	22.3632	32.9055	25.8664	27.2518	19.3167	27.7922	27.0048	29.5397	23.8049	47.8862	40.0971	29.6572	36.3155	33.8669	29.6727	33.102	25.6671	37.2804
Ma09_t06650.1	Ma09_g06650	sp|P55230|GLGL2_ARATH Glucose-1-phosphate adenylyltransferase large subunit 2, chloroplastic OS=Arabidopsis thaliana GN=APL2 PE=2 SV=2//0	mRNA	0.0167499	0.0214862	0.247987	1.43867	0.608334	0.895157	0.265902	0	0.153034	1.68574	0.317886	1.66048	0.138086	0.397071	0.37869	0	0.024279	0.213949	1.58845	1.00855	1.85135	0.233079	0.0327042	0.560446
Ma05_t20290.1	Ma05_g20290	sp|Q38908|XTH30_ARATH Probable xyloglucan endotransglucosylase/hydrolase protein 30 OS=Arabidopsis thaliana GN=XTH30 PE=2 SV=2//4.63457e-133	mRNA	26.2569	31.0522	13.8935	21.4092	34.2879	25.4706	20.6618	39.0935	13.0919	27.9943	28.3935	26.5682	23.7588	16.5266	16.7539	52.2719	63.221	35.1564	37.2513	42.4478	16.0414	17.8379	31.5702	32.7289
Ma10_t10570.1	Ma10_g10570	sp|Q66L33|MK16A_XENLA Protein MAK16 homolog A OS=Xenopus laevis GN=mak16-a PE=2 SV=1//1.07347e-67	mRNA	33.8434	24.6133	22.7702	25.0862	20.951	25.5041	34.4941	19.989	31.6458	29.7469	37.3045	32.0271	40.5052	32.7605	40.6724	21.058	16.0194	29.5302	23.9023	23.8503	29.5145	35.3995	22.8604	28.7359
Ma08_t09750.1	Ma08_g09750	sp|O80470|GDL38_ARATH GDSL esterase/lipase At2g23540 OS=Arabidopsis thaliana GN=At2g23540 PE=2 SV=1//2.14472e-176	mRNA	7.39284	6.06527	35.1527	44.0951	110.536	106.548	25.6402	0.559133	24.4494	13.0586	14.8806	39.2049	130.256	96.8338	117.473	79.0869	13.4739	40.8186	179.695	152.174	96.2101	68.1704	14.8858	176.135
Ma06_t18240.1	Ma06_g18240	-//-	mRNA	0	0	0	0	0	0	0	0	0	0	0	0	0	0	0	0	0	0	0	0	0	0	0	0
Ma08_t28160.2	Ma08_g28160	sp|Q0WVX5|SSY4_ARATH Probable starch synthase 4, chloroplastic/amyloplastic OS=Arabidopsis thaliana GN=SS4 PE=2 SV=1//0	mRNA	4.77285	6.17236	7.68516	2.1559	2.77258	2.07102	3.36886	7.21328	5.95258	2.01324	3.21522	0.83143	4.29882	6.86122	7.24981	1.41835	2.95856	2.05944	1.621	2.35118	1.85923	3.40544	6.46464	1.99514
Ma07_t18100.1	Ma07_g18100	sp|Q67VS5|HAK10_ORYSJ Potassium transporter 10 OS=Oryza sativa subsp. japonica GN=HAK10 PE=2 SV=1//2.27562e-33	mRNA	0	0	0	0	0	0.345378	0	0	0.206575	0	0	0	0	0	0	0	0	0	0	0	0	0	0	0
Ma10_t31530.1	Ma10_g31530	sp|Q56YA5|SGAT_ARATH Serine--glyoxylate aminotransferase OS=Arabidopsis thaliana GN=AGT1 PE=1 SV=2//1.63017e-166	mRNA	0	0	0	0	0	0	0	0	0	0	0	0	0	0	0	0	0	0	0	0	0	0	0	0
Ma09_t15820.1	Ma09_g15820	sp|Q75QN6|DPHS1_ARATH Dual specificity protein phosphatase PHS1 OS=Arabidopsis thaliana GN=PHS1 PE=1 SV=1//0	mRNA	8.07232	9.54926	7.36737	15.2267	9.03331	12.0695	8.061	8.55634	7.64407	10.6225	10.8419	10.4184	9.23049	9.25911	8.92946	12.8116	11.6027	10.2675	12.538	11.2538	10.6541	10.0839	8.24977	10.2109
Ma05_t25600.1	Ma05_g25600	-//-	mRNA	1.39713	0.81783	3.91897	1.0662	2.95726	2.03691	0.366447	1.33165	1.9838	0.754407	1.62496	2.87379	1.2184	2.4305	1.87271	2.44845	2.39911	1.52821	1.7974	0	1.71872	1.8589	0.531387	1.52692
Ma05_t19690.2	Ma05_g19690	sp|Q9ZPE4|FBW2_ARATH F-box protein FBW2 OS=Arabidopsis thaliana GN=FBW2 PE=1 SV=1//3.57766e-95	mRNA	0.167961	0.576366	0.0787754	1.36629	1.62175	3.60391	0.484911	1.11895	0.837891	1.56393	1.19833	1.2889	1.22369	5.45645e-05	1.7034	0.808307	0.72164	0.00760801	1.33509	0.766166	1.78507	1.8626	1.69997	0.000270931
Ma05_t19690.3	Ma05_g19690	sp|Q9ZPE4|FBW2_ARATH F-box protein FBW2 OS=Arabidopsis thaliana GN=FBW2 PE=1 SV=1//3.57766e-95	mRNA	0.0211673	1.25526	1.30354	0.567528	2.19446	3.04251	0.970224	0.390172	1.09657	0.389152	1.99966	2.67192	0.508774	1.11504	1.45727	2.57753	1.91091	1.37914	1.94547	3.07013	2.50274	1.8962	0.354696	2.68914
Ma01_t01440.1	Ma01_g01440	sp|O22798|NAC41_ARATH NAC domain-containing protein 41 OS=Arabidopsis thaliana GN=NAC041 PE=2 SV=1//4.2278e-19	mRNA	0	0	0	0	0	0	0	0	0	0	0	0	0	0	0	0	0	0	0	0	0	0	0	0
Ma09_t13620.1	Ma09_g13620	sp|A3A2Z8|SPL3_ORYSJ Squamosa promoter-binding-like protein 3 OS=Oryza sativa subsp. japonica GN=SPL3 PE=2 SV=1//8.07422e-72	mRNA	9.43012	19.2387	10.5791	28.9295	20.9949	24.6413	15.2215	14.7181	11.4542	20.0988	12.772	26.5557	16.8039	14.2125	13.8144	26.276	25.319	20.1127	19.1162	17.3032	18.8388	20.4715	12.8823	19.8255
Ma04_t10450.1	Ma04_g10450	sp|Q9ZQE5|PP153_ARATH Pentatricopeptide repeat-containing protein At2g15690 OS=Arabidopsis thaliana GN=PCMP-H66 PE=2 SV=2//6.71126e-129	mRNA	11.3895	10.3709	11.628	9.27008	11.1462	10.7268	12.0393	5.11345	10.3663	10.4523	12.5739	10.4658	11.2327	9.3257	9.73608	8.68126	8.36707	9.8258	12.3472	12.3041	12.4642	10.518	7.73197	10.8571
Ma05_t19690.4	Ma05_g19690	sp|Q9ZPE4|FBW2_ARATH F-box protein FBW2 OS=Arabidopsis thaliana GN=FBW2 PE=1 SV=1//3.57766e-95	mRNA	8.68947e-16	0.332373	1.10087e-28	0.436838	1.13882	0.250667	3.91424e-05	3.61039e-09	8.63454e-06	2.64168e-05	4.72442e-05	3.68084e-05	5.61204e-05	9.19702e-10	1.54781e-05	4.61796e-05	0.000137155	3.03861e-21	3.24268e-05	1.40274	1.59376e-05	0.299451	0.262283	0.420866
Ma05_t19690.5	Ma05_g19690	sp|Q9ZPE4|FBW2_ARATH F-box protein FBW2 OS=Arabidopsis thaliana GN=FBW2 PE=1 SV=1//3.57766e-95	mRNA	0.173406	0.295019	1.34202e-35	1.61894	0.000947978	0.875602	1.61037	6.44257e-05	1.9044e-06	0.813443	0.761144	1.40126	0.850115	0.995975	0.777827	0.793274	1.13857	0.939681	1.90178	0.26874	1.37479	1.05742	0.400905	0.614189
Ma08_t24640.3	Ma08_g24640	sp|P48785|PRH_ARATH Pathogenesis-related homeodomain protein OS=Arabidopsis thaliana GN=PRH PE=2 SV=1//2.91156e-28	mRNA	1.76648	2.00136	4.05413	2.62799	2.6895	4.64749	1.33277	4.97255	3.09692	0.000289517	0.000722911	0.556354	0.78127	0.817384	1.97133	2.6587	3.8092	3.45051	0.617423	1.01706	3.41832	3.32412	5.86672	3.63931
Ma08_t11250.1	Ma08_g11250	sp|O65351|SBT17_ARATH Subtilisin-like protease SBT1.7 OS=Arabidopsis thaliana GN=SBT1.7 PE=1 SV=1//0	mRNA	0.0293778	0.018823	0	0.0170372	0	0.0206187	0	0	0.0149118	0	0	0	0	0	0	0	0.0212937	0	0.0488901	0.0226791	0.0386772	0.0511188	0	0.017534
Ma09_t15830.1	Ma09_g15830	sp|Q9LRZ5|PLDP1_ARATH Phospholipase D p1 OS=Arabidopsis thaliana GN=PLDP1 PE=1 SV=1//0	mRNA	2.58639	0.981039	1.66247	2.86717	2.60977	2.96101	2.41871	1.1982	0.881443	2.24428	2.83139	3.18858	2.28734	3.38352	2.946	2.22388	1.72278	3.12918	2.84618	2.55429	1.95211	2.54696	1.19656	1.63163
Ma07_t13960.1	Ma07_g13960	sp|Q8L7M1|B3GTE_ARATH Probable beta-1,3-galactosyltransferase 14 OS=Arabidopsis thaliana GN=B3GALT14 PE=2 SV=1//5.87911e-163	mRNA	6.72805	6.40139	7.18311	4.91513	4.43492	5.32756	8.20434	7.05772	6.57744	4.74728	4.53588	4.4022	4.78981	5.9537	5.12637	4.24801	3.75507	2.73536	4.03143	3.87317	4.99251	4.65928	4.62464	5.26922
Ma04_t16820.1	Ma04_g16820	-//-	mRNA	1.69805	0	5.27155	5.13434	0	0	0	0	0	0	0	0	3.15281	2.98776	0	2.79226	10.5775	1.91942	2.36213	0	0	0	0	0
Ma04_t11610.4	Ma04_g11610	sp|Q6K7H2|KCY4_ORYSJ Probable UMP/CMP kinase 4 OS=Oryza sativa subsp. japonica GN=Os02g0778400 PE=2 SV=1//3.78102e-111	mRNA	0.00107438	0.571773	0.137234	1.38211e-05	0.291034	4.2547e-05	0.143228	7.13625e-05	5.89668e-14	0.467439	7.55462e-05	5.1881e-05	1.98874e-21	3.49193e-06	7.80212e-08	0.050403	0.00724823	3.78266e-05	0.000974566	0.511327	0.000157039	2.63996e-05	1.22896	0.306518
Ma07_t16130.1	Ma07_g16130	sp|Q9M0B8|WTR37_ARATH WAT1-related protein At4g30420 OS=Arabidopsis thaliana GN=At4g30420 PE=3 SV=1//4.69633e-84	mRNA	3.79536	6.48386	7.12293	7.02689	7.50484	8.61748	10.7654	2.09056	10.2737	9.40592	10.7309	14.3214	6.92815	6.15987	6.3237	4.38779	3.63173	6.83664	5.99127	7.3696	15.173	14.5687	2.0491	9.10501
Ma04_t34600.1	Ma04_g34600	sp|Q9LIB3|BAG8_ARATH BAG family molecular chaperone regulator 8, chloroplastic OS=Arabidopsis thaliana GN=BAG1 PE=1 SV=1//3.15248e-18	mRNA	0.543821	0.350192	0.336819	0.632951	0.433779	0.525356	0.915371	0.284889	0.677483	0.544878	0.973821	0.381908	0.464624	0.402748	0.307222	1.12514	0.537249	0.700888	0.73951	0.610526	0.941245	0.830081	0.289334	0.533947
Ma08_t12550.1	Ma08_g12550	sp|Q84LK0|MSH1_ARATH DNA mismatch repair protein MSH1, mitochondrial OS=Arabidopsis thaliana GN=MSH1 PE=1 SV=1//0	mRNA	1.62841	1.37208	2.23911	3.07699	2.2654	2.93698	2.78383	1.4779	2.44855	2.61093	2.42908	2.5724	2.20325	1.88055	1.36437	2.01862	2.3996	3.48918	2.4042	2.96304	3.93472	2.8723	1.58252	2.30443
Ma03_t18500.5	Ma03_g18500	sp|Q9SF32|IQD1_ARATH Protein IQ-DOMAIN 1 OS=Arabidopsis thaliana GN=IQD1 PE=1 SV=1//4.9659e-11	mRNA	0.51927	2.67957	0.436552	0.991272	1.31752	2.15038	0.731846	0.306942	1.45967	1.03512	8.43642e-05	1.79938	1.19635	1.36245	0.704326	0.910133	3.24401e-06	1.09417	0.888972	1.09161	1.48832	1.68386	0.000377522	1.82772
Ma06_t37860.1	Ma06_g37860	-//-	mRNA	2.23809	0.520546	1.38031e-05	1.1395	1.96769	2.9277	0.943274	3.51529	0.622075	1.91148	1.52015	1.25608	1.00288e-07	0.343112	0.919537	1.56357	3.8215	1.12856	1.9159	1.54255	1.2052	0.000476274	1.33908	0.595191
Ma06_t37860.2	Ma06_g37860	-//-	mRNA	6.94671	4.42537	6.79131	3.45376	9.63305	9.86202	5.66976	10.5388	3.37481	7.36368	5.19124	3.99303	5.85746	7.8868	8.25362	8.30504	10.6547	5.9336	5.7048	7.74046	5.27094	5.43707	7.56285	7.10369
Ma05_t31700.1	Ma05_g31700	sp|Q8W4I7|CDPKD_ARATH Calcium-dependent protein kinase 13 OS=Arabidopsis thaliana GN=CPK13 PE=1 SV=2//0	mRNA	2.941	3.80022	2.86833	5.06031	3.37811	4.19761	4.2961	1.83759	4.05294	6.25814	3.83899	6.25348	4.76969	2.33659	2.68511	2.58594	4.05148	2.94772	6.09137	5.09569	8.44785	6.09927	2.36537	6.55584
Ma02_t15700.1	Ma02_g15700	sp|O49447|ADT3_ARATH ADP,ATP carrier protein 3, mitochondrial OS=Arabidopsis thaliana GN=AAC3 PE=2 SV=1//2.75941e-136	mRNA	1.50071	0.541483	1.82285	1.07372	1.75757	1.4404	1.98353	0.674174	1.22695	0.860151	0.967051	0.966133	0.77937	1.26605	1.31721	1.16769	0.965619	1.65096	0.622188	0.771933	0.817322	1.01061	0.649378	1.21148
Ma10_t13340.1	Ma10_g13340	sp|Q9FYP9|IMAP2_ORYSJ Importin subunit alpha-2 OS=Oryza sativa subsp. japonica GN=Os01g0158000 PE=2 SV=1//0	mRNA	20.7334	20.5168	20.0812	20.2373	17.0672	16.4551	19.4715	18.4835	19.3526	18.6254	23.3017	18.4862	16.2772	18.6276	18.9303	20.4896	19.6436	19.5701	15.1498	15.6781	17.5809	18.8542	19.272	17.261
Ma00_t01990.1	Ma00_g01990	-//-	mRNA	0.267663	1.16903	0	0.678348	0	0	0.702246	0	0.271451	0.361595	2.32807	1.37686	0.877959	0.385772	1.06557	0.469081	0	2.5668	0.431118	1.23211	0.330233	0.594675	0	1.45614
Ma01_t14130.1	Ma01_g14130	sp|O22193|PUB4_ARATH U-box domain-containing protein 4 OS=Arabidopsis thaliana GN=PUB4 PE=1 SV=3//1.38915e-31	mRNA	0.288502	2.1954	1.16811	3.83464	1.61453	1.70425	2.28839	0.582778	2.81842	2.28309	1.86723	7.01129	4.60132	1.36469	1.77526	1.07329	0.940031	1.17409	2.57352	3.39501	3.77665	5.20925	0.421589	4.09257
Ma05_t03040.1	Ma05_g03040	sp|Q9SR13|FLK_ARATH Flowering locus K homology domain OS=Arabidopsis thaliana GN=FLK PE=1 SV=1//7.07855e-152	mRNA	15.5287	16.5688	11.9032	13.6487	9.31617	13.3229	21.2439	11.7288	12.1222	18.63	24.0811	14.0227	11.9361	14.7786	14.7549	11.0201	8.06406	19.2356	14.1907	14.3033	14.0541	15.5482	14.1887	13.7558
Ma05_t03040.2	Ma05_g03040	sp|Q9SR13|FLK_ARATH Flowering locus K homology domain OS=Arabidopsis thaliana GN=FLK PE=1 SV=1//7.07855e-152	mRNA	7.0038	9.12126	5.51328	4.657	4.39976	2.60389	9.98966	6.11529	4.93194	9.11183	9.12995	10.5906	6.18263	7.13324	6.60924	5.36599	4.04054	6.88983	7.29489	5.8963	10.1443	7.00447	4.96803	5.89636
Ma09_t14510.1	Ma09_g14510	sp|Q9UXR9|DNAJ_METTE Chaperone protein DnaJ OS=Methanosarcina thermophila GN=dnaJ PE=3 SV=1//2.16696e-16	mRNA	2.52184	2.88067	1.42737	1.95929	1.73396	2.34817	2.54152	5.0769	1.27945	2.55052	2.82596	1.70912	2.15463	2.47027	2.50834	1.97522	2.68697	2.15177	1.53591	1.53539	1.37887	1.90692	3.22199	1.79157
Ma07_t12400.1	Ma07_g12400	-//-	mRNA	1.65298e-06	1.1738e-05	5.98829e-06	4.07954e-06	0.153164	3.13497e-05	1.44018e-05	6.63758e-05	1.25616e-05	1.43102e-05	0.229379	6.58689e-06	1.25004e-06	3.17644e-06	2.89227e-06	0.352131	0.219169	1.16881e-05	2.44236e-05	4.24163e-05	0.000230844	4.95001e-06	0.37181	2.87833e-06
Ma07_t12400.2	Ma07_g12400	-//-	mRNA	2.57288	3.40102	4.28636	3.24742	2.89664	2.75909	3.40203	3.97989	3.28748	2.9593	3.54599	3.3516	1.52636	2.28336	2.3011	2.55201	1.7804	3.43042	2.91576	2.42941	2.53965	2.76621	2.74174	2.98734
Ma06_t01940.1	Ma06_g01940	sp|Q94ID6|ERF81_ARATH Ethylene-responsive transcription factor 12 OS=Arabidopsis thaliana GN=ERF12 PE=2 SV=1//3.56855e-29	mRNA	0.551975	0.204619	0.787231	1.33759	1.49993	1.47268	0.521158	0.182124	0.520208	0.216984	0.591465	1.01529	1.4753	0.94674	0.952969	0.276098	0.513776	0.948326	0.85025	0.851811	1.44384	0.819613	0.537538	0.333793
Ma04_t40120.1	Ma04_g40120	sp|Q94JL3|BH112_ARATH Transcription factor bHLH112 OS=Arabidopsis thaliana GN=BHLH112 PE=2 SV=1//3.28171e-52	mRNA	1.88305	2.39402	1.32762	4.33234	3.16628	2.03362	2.35764	0.73553	1.46782	3.19871	3.23646	1.92648	2.51466	1.34258	1.83158	1.0596	1.12103	3.19742	2.99302	2.54383	2.98652	2.53449	0.328271	1.82836
Ma07_t00840.1	Ma07_g00840	sp|Q9LDD1|BRG3_ARATH Probable BOI-related E3 ubiquitin-protein ligase 3 OS=Arabidopsis thaliana GN=BRG3 PE=1 SV=1//1.18707e-48	mRNA	0	0	0	0.251286	0.584488	1.24488	0	0	0.16269	0.146864	0	0.412849	0	0.476564	0	0.28067	0.0773207	0	0.0884869	0.329773	0.208894	0.246247	0	1.107
Ma03_t08990.1	Ma03_g08990	sp|Q6ATY4|U603_ORYSJ UPF0603 protein Os05g0401100, chloroplastic OS=Oryza sativa subsp. japonica GN=Os05g0401100 PE=3 SV=1//2.56259e-115	mRNA	0.257486	0.285972	0.320896	0.644882	0.798707	0.527125	0.583521	0.339707	0.448013	0.506215	0.551427	0.615691	0.516578	0.185673	0.424097	0.257589	0.319597	0.312378	0.305201	0.340607	0.336999	0.170007	0.214992	0.444255
Ma11_t24900.1	Ma11_g24900	sp|Q9STL1|C71AM_ARATH Cytochrome P450 71A22 OS=Arabidopsis thaliana GN=CYP71A22 PE=2 SV=1//3.25291e-93	mRNA	1.04217	2.60121	1.80138	3.4239	6.53727	5.87737	2.86107	0.185175	0.528872	3.14335	7.21709	2.68373	2.20249	2.0271	2.95059	8.77183	5.04908	9.01661	4.45469	5.87637	2.41112	3.28639	0.15613	2.86127
Ma09_t17490.1	Ma09_g17490	sp|Q6K7E6|ERF1_ORYSJ Ethylene-responsive transcription factor 1 OS=Oryza sativa subsp. japonica GN=EREBP1 PE=1 SV=1//3.72203e-51	mRNA	2.33364	1.96377	1.39035	2.14559	1.82996	1.64782	3.19894	1.56407	2.62734	3.68378	5.2403	4.67063	1.79639	1.48602	1.99263	2.37695	5.07282	3.97198	2.18709	2.84932	3.6525	3.22013	2.85674	3.43053
Ma11_t03950.2	Ma11_g03950	sp|Q6TBX7|LUT1_ARATH Carotene epsilon-monooxygenase, chloroplastic OS=Arabidopsis thaliana GN=CYP97C1 PE=1 SV=1//0	mRNA	0.115024	0.22413	3.96595e-07	0.243593	0.265188	0.231044	0.478263	0	0.400183	0.00219618	0.00218661	0.550064	0.445054	0.382358	0.242319	0	0.238201	0.256553	0.2049	0.228322	0.647965	0.668733	0.00306645	0.292681
Ma06_t06390.1	Ma06_g06390	sp|Q9LK09|SYP32_ARATH Syntaxin-32 OS=Arabidopsis thaliana GN=SYP32 PE=2 SV=1//1.94799e-112	mRNA	9.78926	12.4993	12.0459	11.5985	13.2357	13.7469	10.9964	11.9003	10.45	9.53062	12.621	11.6031	10.8564	12.6691	12.2077	15.2673	15.736	12.9514	10.2403	10.495	10.3944	11.909	14.4448	12.1794
Ma02_t22660.2	Ma02_g22660	sp|Q04832|HEXP_LEIMA DNA-binding protein HEXBP OS=Leishmania major GN=HEXBP PE=3 SV=1//2.91125e-13	mRNA	6.06667	6.13472	6.26674	8.33541	7.17101	8.66457	6.63839	7.76105	4.90594	5.43496	6.34451	6.34663	5.9279	6.2875	7.5716	9.57691	10.9234	9.82464	6.32044	5.89744	6.8271	6.08328	8.34778	5.53699
Ma02_t20800.1	Ma02_g20800	sp|Q9LYW9|DNJ36_ARATH DnaJ protein P58IPK homolog OS=Arabidopsis thaliana GN=P58IPK PE=1 SV=1//0	mRNA	26.066	12.0944	19.7305	10.8365	10.0339	7.86319	15.433	19.7561	17.3008	16.6967	18.5865	10.4358	16.1046	18.1175	19.0024	9.44763	8.77899	12.4043	7.76741	7.83719	10.4563	11.2205	17.2337	12.2648
Ma08_t29020.1	Ma08_g29020	sp|Q9MAT6|HMG15_ARATH High mobility group B protein 15 OS=Arabidopsis thaliana GN=HMGB15 PE=2 SV=1//3.06633e-112	mRNA	0.000526685	0.000195469	7.06329e-05	0.00489473	0.000805097	0.00139573	1.65797	8.60752e-05	0.00118368	0.00113873	0.00513401	0.0299199	0.000909939	0.00288075	0.000391523	1.83297	1.55456	0.0180799	1.44714	0.000588732	1.39131	0.000288744	0.000979103	0.000991549
Ma08_t29020.3	Ma08_g29020	sp|Q9MAT6|HMG15_ARATH High mobility group B protein 15 OS=Arabidopsis thaliana GN=HMGB15 PE=2 SV=1//3.06633e-112	mRNA	1.19765	1.0267	5.73012e-06	3.309	2.49826	0.990926	1.86461	0.544536	9.90171e-07	2.74406e-06	1.26861	3.74291e-08	2.36012	2.11912	0.555532	2.4015	4.36814	1.57353	0.00166303	5.48484e-06	1.80475	1.10656	3.45281	2.41865
Ma08_t29020.2	Ma08_g29020	sp|Q9MAT6|HMG15_ARATH High mobility group B protein 15 OS=Arabidopsis thaliana GN=HMGB15 PE=2 SV=1//3.06633e-112	mRNA	4.25233	3.91284	4.19427	2.31774	4.5629	6.00559	1.17463	5.41422	4.503	4.30647	4.46838	4.93814	2.42656	3.82613	4.45727	2.98668	0.691976	3.15728	2.91477	4.76461	1.13716	4.5598	5.46281	2.47218
Ma05_t04840.1	Ma05_g04840	-//-	mRNA	0.400158	0.130496	0	0.23493	0.0682829	0.0725891	0.132186	0	0.101525	0.137511	0.342045	0.128812	0.174887	0.127201	0.106253	0.0875713	0.0723865	0.07067	0.0828629	0.231524	0.260945	0.115317	0.389244	0.0608403
Ma09_t24910.1	Ma09_g24910	sp|Q84WP6|NAC43_ARATH NAC domain-containing protein 43 OS=Arabidopsis thaliana GN=NAC043 PE=2 SV=2//2.11993e-105	mRNA	0.527788	1.18604	1.35027	0.810094	0.532953	0.424984	1.02231	0.477549	1.03328	1.11723	1.58513	1.33475	1.24234	0.729928	1.02877	0.527981	0.764952	2.03258	0.564341	0.989422	2.33014	3.08082	0.331159	0.3608
Ma04_t00730.1	Ma04_g00730	sp|Q9FH28|DNJ49_ARATH Chaperone protein dnaJ 49 OS=Arabidopsis thaliana GN=ATJ49 PE=2 SV=2//1.69968e-62	mRNA	42.0402	57.4134	54.4844	64.4754	81.2627	79.7389	47.3677	47.9861	42.2425	56.4587	54.2039	62.0988	64.9574	53.5055	54.1547	95.4752	80.0303	74.5149	87.9692	89.0671	63.2693	63.1101	59.6525	72.7409
Ma03_t23750.1	Ma03_g23750	-//-	mRNA	0.140209	0.181515	0.698342	0.245663	0.0950659	0.250746	0.185363	0.323641	0.320199	0.192985	0.0954964	0.225656	0.205221	0.132569	0.0733528	0.0613658	0.203053	0.148872	0.232721	0.216391	0.458978	0.283596	0.0683037	0.211477
Ma07_t25030.1	Ma07_g25030	sp|F4I116|SYLC_ARATH Leucine--tRNA ligase, cytoplasmic OS=Arabidopsis thaliana GN=At1g09620 PE=1 SV=1//0	mRNA	67.816	59.1487	65.2885	58.951	57.8973	64.1417	67.5688	46.1268	63.8973	63.0124	82.1373	58.0638	68.5448	65.2162	70.6748	58.3588	52.6238	72.0927	54.1648	53.3891	54.584	60.6954	49.0124	50.316
Ma04_t18610.1	Ma04_g18610	sp|Q9C8M5|WAG1_ARATH Serine/threonine-protein kinase WAG1 OS=Arabidopsis thaliana GN=WAG1 PE=2 SV=1//1.54487e-111	mRNA	0.608542	0.353045	1.1157	1.27722	2.11513	2.18687	1.81765	0.13565	1.29528	3.00328	1.25167	4.54923	2.61007	1.76632	1.59818	0.618584	1.56477	1.39247	7.34574	6.18235	5.8331	2.77571	0.0383164	2.09094
Ma00_t05180.1	Ma00_g05180	sp|Q9SL67|PRS4B_ARATH 26S proteasome regulatory subunit 4 homolog B OS=Arabidopsis thaliana GN=RPT2B PE=1 SV=1//2.25188e-18	mRNA	0	0	0	0	0	0	0	0	0	0	0	0	0	0	0	0	0	0	0	0	0	0	0	0
Ma01_t03270.1	Ma01_g03270	-//-	mRNA	5.84038	7.52298	7.43702	6.36596	8.29532	10.7195	7.91751	2.38258	6.40596	5.194	5.76529	10.3666	11.1212	6.63291	7.51166	7.60001	5.47465	6.33112	9.11821	8.88415	11.4408	10.3182	5.05105	8.77591
Ma04_t17880.1	Ma04_g17880	sp|Q8GUM4|Y3739_ARATH Uncharacterized membrane protein At3g27390 OS=Arabidopsis thaliana GN=At3g27390 PE=1 SV=2//2.80732e-09	mRNA	0	0	0	0	0	0	0	0	0	0	0	0	0	0	0	0	0	0	0	0	0	0	0	0
Ma08_t26690.1	Ma08_g26690	sp|Q02921|NO93_SOYBN Early nodulin-93 OS=Glycine max PE=2 SV=1//1.33333e-15	mRNA	194.767	113.487	128.504	49.8622	49.0979	45.4638	126.986	182.809	133.388	161.043	164.268	68.2269	112.03	104.219	135.617	39.1449	31.8554	77.6677	41.9692	36.6613	59.6106	79.632	125.045	67.0081
Ma11_t03920.1	Ma11_g03920	sp|Q84WQ5|CBSX5_ARATH CBS domain-containing protein CBSX5 OS=Arabidopsis thaliana GN=CBSX5 PE=2 SV=2//4.22076e-64	mRNA	57.3033	67.7488	68.6025	37.6805	33.2484	19.5725	71.5917	109.983	63.3331	71.0211	47.7535	42.4118	39.5662	43.7471	46.6128	49.9656	49.2977	54.718	57.2428	65.5742	60.9111	39.3694	80.4252	50.2653
Ma02_t06250.1	Ma02_g06250	sp|Q9FGL0|WTR44_ARATH WAT1-related protein At5g47470 OS=Arabidopsis thaliana GN=At5g47470 PE=3 SV=1//1.92083e-58	mRNA	1.20552	0.316835	6.27757	6.41392	15.608	16.312	3.09108	0.226832	1.42349	6.98227	8.55565	30.6302	8.20845	3.51489	4.20388	5.77145	2.60229	7.28983	23.1441	15.9887	4.29651	14.6718	0.383963	7.6757
Ma05_t11320.1	Ma05_g11320	sp|Q292F9|GDAP2_DROPS Protein GDAP2 homolog OS=Drosophila pseudoobscura pseudoobscura GN=GA15091 PE=3 SV=1//1.05613e-11	mRNA	50.6137	78.7706	48.3717	66.3698	129.733	125.059	35.6829	102.357	23.0921	58.6668	54.725	81.1219	57.3206	39.6856	39.7666	162.424	165.394	112.023	113.042	125.003	45.4486	34.4229	72.8941	84.2738
Ma10_t16810.2	Ma10_g16810	-//-	mRNA	31.5031	28.416	26.2381	20.5038	28.6351	28.8242	18.3972	60.0027	23.3873	28.2291	23.7747	25.9136	26.6687	28.1719	29.887	39.0094	45.7735	23.7635	22.5352	24.1586	15.9342	19.6673	51.784	30.125
Ma05_t27740.1	Ma05_g27740	-//-	mRNA	0.13106	0	0	0.0773637	0	0	0.0865395	0.151894	0	0	0	0	0	0	0	0	0	0.0923894	0	0.101074	0.0851147	0	0	0
Ma10_t16810.1	Ma10_g16810	-//-	mRNA	2.19839	3.10999	2.48009	0.747999	2.91221	6.31966	2.59444	3.93943	2.79774	0.406561	1.61263	0.00018811	2.00653	2.75629	4.11372	7.06748	3.00897	4.27085	2.82662	1.18795	0.462844	9.90612e-05	4.61355	3.42252
Ma07_t17960.1	Ma07_g17960	sp|O24606|EIN3_ARATH Protein ETHYLENE INSENSITIVE 3 OS=Arabidopsis thaliana GN=EIN3 PE=1 SV=1//1.05775e-86	mRNA	0.0437962	0.0844879	0	0	0.0295229	0	0	0	0	0	0	0	0.0257479	0.0822039	0.0226174	0	0	0.0621139	0	0	0	0	0	0.0262392
Ma10_t12490.1	Ma10_g12490	-//-	mRNA	1.04077	0.973345	1.66434	4.77647	1.81181	2.75694	3.3015	0.384727	2.02811	2.92063	2.49959	5.30666	1.60534	0.948245	0.657691	0.583068	0.60271	1.531	3.86627	2.50545	7.01972	3.41231	0.0810646	2.92377
Ma07_t28280.2	Ma07_g28280	-//-	mRNA	20.1915	14.6406	12.0323	13.1646	11.3191	12.5788	11.1931	17.1052	12.995	12.9579	17.0197	13.0673	16.6165	12.9402	19.8444	11.4417	10.3331	10.4195	12.3963	7.56199	11.9254	15.5069	13.053	14.9444
Ma07_t28280.1	Ma07_g28280	-//-	mRNA	32.4686	25.1649	27.7721	18.9342	21.0529	20.8817	35.5286	48.6561	33.7725	25.9801	24.3188	23.3052	34.5778	30.1208	38.8558	25.7722	27.709	20.6493	25.2428	26.5578	22.5482	24.2074	35.9646	26.2916
Ma03_t11400.1	Ma03_g11400	sp|Q41140|PFPA_RICCO Pyrophosphate--fructose 6-phosphate 1-phosphotransferase subunit alpha OS=Ricinus communis GN=PFP-ALPHA PE=3 SV=1//0	mRNA	71.6359	105.616	91.9228	67.4524	78.4108	83.4862	78.9055	80.0718	79.0413	67.1454	67.8569	64.3888	73.6874	91.9554	91.4965	74.6198	60.9781	60.5207	61.7888	62.3435	57.8594	71.2776	91.3203	84.3154
Ma08_t18160.1	Ma08_g18160	sp|Q9SP07|1433_LILLO 14-3-3-like protein OS=Lilium longiflorum PE=2 SV=1//9.32581e-169	mRNA	74.4438	68.1038	66.4531	59.9153	50.0101	44.9918	122.679	83.2938	52.2049	86.2703	102.952	68.9722	49.8658	42.7032	45.9246	64.8915	64.0114	67.5868	66.0155	70.0041	48.9185	64.0541	85.6595	61.5566
Ma08_t18160.2	Ma08_g18160	sp|Q9SP07|1433_LILLO 14-3-3-like protein OS=Lilium longiflorum PE=2 SV=1//9.32581e-169	mRNA	87.9124	124.412	90.6564	65.6624	60.1852	39.2466	158.476	160.812	85.6158	106.711	132.797	47.4371	41.3308	55.5308	50.8417	95.876	89.5178	74.5913	41.1995	60.2087	44.775	55.2492	151.27	52.4783
Ma08_t18160.3	Ma08_g18160	sp|Q9SP07|1433_LILLO 14-3-3-like protein OS=Lilium longiflorum PE=2 SV=1//9.32581e-169	mRNA	21.2522	27.5026	25.2808	18.7482	17.7595	15.151	35.2535	27.1591	16.657	30.8561	33.7841	23.7198	11.4839	13.3509	8.8472	36.8787	23.0408	22.7364	27.0998	17.0165	10.9348	10.0913	34.5993	13.8931
Ma04_t22270.1	Ma04_g22270	sp|Q9C801|MOS2_ARATH Protein MOS2 OS=Arabidopsis thaliana GN=MOS2 PE=2 SV=1//2.19365e-06	mRNA	11.3314	8.82471	8.54484	7.41567	8.92774	7.8908	7.87841	8.09993	6.92776	7.00878	8.57849	6.15246	7.117	5.82907	7.65034	10.5962	10.8687	7.20544	8.59922	7.72409	9.38874	6.77245	9.74336	8.06187
Ma06_t27930.1	Ma06_g27930	sp|Q9M0Y8|NSF_ARATH Vesicle-fusing ATPase OS=Arabidopsis thaliana GN=NSF PE=2 SV=2//3.70804e-10	mRNA	0.243624	0.632562	0.507013	1.47313	0.717564	1.92714	1.12706	0.750369	1.40115	0.782039	0.775493	0.993325	1.13909	0.975664	1.0253	1.06629	1.29332	0.746725	0.404079	0.751907	1.22104	1.12521	0.632591	1.52332
Ma00_t01200.1	Ma00_g01200	-//-	mRNA	15.2613	12.9929	14.2209	15.7422	17.7358	16.5385	10.9543	9.92749	13.2378	12.6903	13.6794	12.0154	19.1088	14.9722	16.21	19.7725	19.3636	15.5432	17.2604	17.8616	12.2309	13.9895	12.7898	14.9609
Ma08_t17320.1	Ma08_g17320	-//-	mRNA	0	0	0	0	0	0	0	0	0	0	0	0	0	0	0	0	0	0	0	0	0	0	0	0
Ma00_t00250.1	Ma00_g00250	sp|Q9LV40|ROGF8_ARATH Rho guanine nucleotide exchange factor 8 OS=Arabidopsis thaliana GN=ROPGEF8 PE=1 SV=1//0	mRNA	0	0	0	0	0	0	0	0	0	0	0	0	0	0	0	0	0.0286841	0	0	0	0	0	0	0
Ma11_t00690.1	Ma11_g00690	sp|O94424|T2FB_SCHPO Transcription initiation factor IIF subunit beta OS=Schizosaccharomyces pombe (strain 972 / ATCC 24843) GN=tfg2 PE=1 SV=1//3.48211e-20	mRNA	86.6245	97.3001	100.654	105.93	127.143	140.804	74.5514	69.0879	83.3037	85.0804	95.7292	117.051	137.306	97.9611	107.722	150.838	114.297	132.029	138.794	135.645	107.78	119.708	82.7644	132.821
Ma10_t07000.1	Ma10_g07000	-//-	mRNA	0.274771	0.673295	1.09067	1.69659	2.15387	2.30289	0.76305	0.316794	1.22719	1.28673	0.747078	2.33487	0.870772	0.896765	0.656318	0.673445	0.398073	0.623036	3.24124	2.24788	1.36995	1.08124	0.321519	2.01432
Ma08_t03090.1	Ma08_g03090	sp|A9ZPJ7|AGCT2_HORVU Agmatine coumaroyltransferase-2 OS=Hordeum vulgare GN=ACT-2 PE=1 SV=1//5.64401e-142	mRNA	0	0	0	0	0	0	0	0	0	0	0	0	0	0	0	0	0	0	0	0	0	0	0	0
Ma05_t11930.1	Ma05_g11930	sp|Q03685|BIP5_TOBAC Luminal-binding protein 5 OS=Nicotiana tabacum GN=BIP5 PE=2 SV=1//2.03515e-41	mRNA	0	0.382453	0	0	0	0.472708	0.345338	0.625945	0	1.42279	0.381152	0	0	0.378519	0	0	0	0	0	0	0.975339	0	2.00498	0
Ma08_t13620.1	Ma08_g13620	-//-	mRNA	0	112.147	0	124.377	649.931	470.796	62.91	62.7458	20.7003	153.989	45.1898	214.786	17.7819	45.2051	0	0	103.445	76.795	168.897	147.039	95.0111	0	79.5618	28.558
Ma05_t25280.1	Ma05_g25280	sp|Q9LX20|ASPL1_ARATH Aspartic proteinase-like protein 1 OS=Arabidopsis thaliana GN=At5g10080 PE=1 SV=1//9.56111e-171	mRNA	1.96519	1.66621	2.14463	3.30233	1.9782	2.52778	3.0286	1.40623	2.78904	2.49837	2.97622	3.97941	2.29028	1.38251	1.63111	0.93524	1.76977	1.89489	3.10992	3.00446	5.89606	4.24617	1.1173	2.35127
Ma09_t01150.1	Ma09_g01150	sp|Q61FW2|SEL10_CAEBR F-box/WD repeat-containing protein sel-10 OS=Caenorhabditis briggsae GN=sel-10 PE=3 SV=1//7.3453e-09	mRNA	1.45855	2.77278	2.11429	5.71613	4.3476	4.19511	0.926081	2.01573	1.71752	3.00212	0.896973	1.90287	1.78494	2.35719	2.04387	5.00465	5.01697	1.4071	6.9863	5.40415	2.63378	1.5102	4.32742	2.42033
Ma11_t19880.1	Ma11_g19880	sp|B3SGL0|BCH_GENLU Beta-carotene 3-hydroxylase, chloroplastic OS=Gentiana lutea GN=BHY PE=2 SV=1//1.76734e-98	mRNA	4.09671	4.96094	6.36201	5.74751	4.89731	2.5742	3.72217	1.28531	2.9137	3.56965	6.63082	4.66456	2.61653	2.30937	2.66373	1.70762	1.57459	3.11993	4.30588	3.61344	3.21742	4.19281	2.33697	2.78044
Ma01_t08450.2	Ma01_g08450	sp|Q9SII8|DSK2B_ARATH Ubiquitin domain-containing protein DSK2b OS=Arabidopsis thaliana GN=DSK2B PE=1 SV=1//3.05822e-10	mRNA	35.7418	40.4449	43.2793	34.375	40.296	37.9079	36.047	74.8315	32.9282	40.3148	36.2137	32.2678	27.9491	32.2265	29.5573	50.0248	42.0655	39.5872	32.386	34.1614	28.147	28.7252	54.3653	39.8742
Ma01_t08450.3	Ma01_g08450	sp|Q9SII8|DSK2B_ARATH Ubiquitin domain-containing protein DSK2b OS=Arabidopsis thaliana GN=DSK2B PE=1 SV=1//3.05822e-10	mRNA	0.148604	0.254194	0.279763	0.101783	0.076385	0.0881118	0.194562	0.94228	0.239162	0.106865	0.220429	0.0862078	0.0557324	0.192949	0.186216	4.37309e-06	0.295818	0.163474	0.259803	0.036633	0.10494	0.177475	0.203863	0.146076
Ma01_t08450.1	Ma01_g08450	sp|Q9SII8|DSK2B_ARATH Ubiquitin domain-containing protein DSK2b OS=Arabidopsis thaliana GN=DSK2B PE=1 SV=1//3.05822e-10	mRNA	0.517657	0.842494	1.27431	0.358711	0.349549	0.389078	0.811525	3.56351	0.927007	0.401873	0.72209	0.323823	0.231874	0.487106	0.694325	2.38674e-05	1.02013	1.07776	0.957682	0.196161	0.36645	0.499329	0.887161	0.62206
Ma06_t24070.2	Ma06_g24070	sp|Q0E3L5|UREF_ORYSJ Urease accessory protein F OS=Oryza sativa subsp. japonica GN=UREF PE=2 SV=2//5.05432e-117	mRNA	4.92326	6.45401	9.28863	3.40894	2.42823	3.46787	6.44819	9.79806	3.71622	6.50189	6.298	4.24675	3.88314	4.65407	4.70247	5.58973	4.57997	3.7391	2.97821	2.97713	2.64864	3.70021	4.5912	4.69172
Ma01_t08450.4	Ma01_g08450	sp|Q9SII8|DSK2B_ARATH Ubiquitin domain-containing protein DSK2b OS=Arabidopsis thaliana GN=DSK2B PE=1 SV=1//3.05822e-10	mRNA	13.2757	15.9646	13.1895	13.3414	12.5251	11.9178	11.7956	25.7421	11.1131	13.7727	14.4264	11.6569	8.91921	15.8105	10.3773	14.4414	15.9705	8.62727	11.7383	9.44112	10.7005	12.9007	16.8774	12.9824
Ma07_t03040.1	Ma07_g03040	sp|Q9T0G0|HSD5_ARATH 11-beta-hydroxysteroid dehydrogenase-like 5 OS=Arabidopsis thaliana GN=HSD5 PE=2 SV=1//3.68698e-155	mRNA	0	0.0491333	0	0	0	0	0	0	0	0	0	0	0	0	0	0	0	0	0.0628803	0	0	0	0	0
Ma01_t06420.1	Ma01_g06420	sp|Q9LJL4|IPT8_ARATH Adenylate isopentenyltransferase 8, chloroplastic OS=Arabidopsis thaliana GN=IPT8 PE=2 SV=1//2.58563e-67	mRNA	0.0968034	0.0834308	0	0.225929	0.218515	0.0460443	0.0853274	0	0.131009	0.0444246	0.219613	0.249274	0.11345	0	0.0336698	0.395435	0.420633	0.365594	0.160733	0.298818	0.0422831	0.0746279	0	0.0388778
Ma09_t19770.2	Ma09_g19770	sp|B6EUA9|PR40A_ARATH Pre-mRNA-processing protein 40A OS=Arabidopsis thaliana GN=PRP40A PE=1 SV=1//0	mRNA	15.6423	14.8674	8.97263	13.8329	12.5153	13.0612	11.3194	13.1706	15.0065	11.2741	12.5194	13.5053	17.7375	17.203	20.198	15.4087	16.9552	16.9243	7.88661	11.3851	11.9724	17.2687	17.264	15.6372
Ma10_t06530.1	Ma10_g06530	sp|Q5YLM1|DGLA_RAT Sn1-specific diacylglycerol lipase alpha OS=Rattus norvegicus GN=Dagla PE=2 SV=1//3.28778e-11	mRNA	3.18765	3.29175	2.58957	3.49133	3.77928	3.41639	5.39698	10.2069	4.37546	6.20046	4.79463	7.40131	3.85454	4.0621	3.29453	5.84111	6.0615	3.33114	6.41257	6.70454	6.63884	7.8305	8.44056	6.4804
Ma10_t16770.1	Ma10_g16770	sp|Q9C5S1|MKP1_ARATH Protein-tyrosine-phosphatase MKP1 OS=Arabidopsis thaliana GN=MKP1 PE=1 SV=1//1.25888e-86	mRNA	5.14045	2.97708	3.30082	1.82246	2.97836	2.42667	3.19413	9.09903	3.06336	3.5825	2.33372	1.37354	3.31883	4.32842	3.68855	3.90521	4.62509	2.64812	1.61491	2.17984	1.12202	1.52622	9.03265	1.48915
Ma02_t13580.1	Ma02_g13580	-//-	mRNA	0	0	0	0	0	0	0	0	0	0	0	0	0	0	0	0	0	0	0	0	0	0	0	0
Ma07_t26300.1	Ma07_g26300	-//-	mRNA	2.10565	1.94841	0	0.556875	0	0.854889	0.55093	2.04112	0.855086	0.564035	2.52578	0.537774	2.66905	0.646111	3.72871	1.47308	3.574	1.68421	0.66425	0	0	1.82598	0	1.19507
Ma06_t33580.1	Ma06_g33580	sp|Q9FLV9|SLAH3_ARATH S-type anion channel SLAH3 OS=Arabidopsis thaliana GN=SLAH3 PE=1 SV=1//0	mRNA	44.0248	20.4661	35.5123	14.2412	31.189	21.2125	29.6226	76.4919	19.1326	39.3389	35.2594	9.79341	26.543	33.7275	36.0777	15.5752	9.00661	24.0183	27.7116	23.123	9.58493	11.0945	46.333	18.1264
Ma02_t15780.1	Ma02_g15780	sp|Q5F259|AN13B_MOUSE Ankyrin repeat domain-containing protein 13B OS=Mus musculus GN=Ankrd13b PE=2 SV=1//3.49461e-08	mRNA	0.884071	0.711774	1.13385	1.69045	1.65598	1.68308	1.12366	0.638663	1.09104	1.29046	0.705077	1.18284	0.979759	1.49284	1.30118	0.789017	1.48244	1.64821	2.82616	2.35513	2.59986	1.40695	1.08301	1.34688
Ma10_t25830.1	Ma10_g25830	sp|Q9CZV8|FXL20_MOUSE F-box/LRR-repeat protein 20 OS=Mus musculus GN=Fbxl20 PE=1 SV=3//4.68931e-06	mRNA	11.0218	8.15622	11.7671	8.29301	10.782	10.1771	6.93755	15.2601	8.32637	8.99516	9.04128	6.39703	7.98055	9.56098	11.3799	11.874	11.4303	9.09086	10.0998	9.16223	6.06609	6.64986	10.7373	8.37747
Ma07_t21400.1	Ma07_g21400	sp|O04529|2MMP_ARATH Metalloendoproteinase 2-MMP OS=Arabidopsis thaliana GN=2MMP PE=1 SV=1//1.88949e-106	mRNA	64.425	18.4552	20.2242	3.9562	8.81441	3.21495	31.1558	223.378	12.012	52.5379	12.8608	3.22766	15.8223	14.5794	17.4316	12.4584	12.0675	8.21388	5.28507	5.82527	1.27342	7.6443	84.6432	9.16538
Ma02_t13590.2	Ma02_g13590	sp|Q6AZD4|IMP2L_DANRE Mitochondrial inner membrane protease subunit 2 OS=Danio rerio GN=immp2l PE=2 SV=1//4.7867e-24	mRNA	0.147732	0.796116	1.16664	0.000219652	0.588854	0.56673	0.159774	0.346413	0.473102	2.49336e-05	0.323724	0.866766	0.865402	0.775348	0.67344	0.9404	1.09376	0.719363	2.12638e-05	4.31218e-05	0.580755	0.320569	0.175648	4.91332e-05
Ma02_t13590.3	Ma02_g13590	sp|Q6AZD4|IMP2L_DANRE Mitochondrial inner membrane protease subunit 2 OS=Danio rerio GN=immp2l PE=2 SV=1//4.7867e-24	mRNA	2.92965	3.34589	1.96184	2.51787	1.40233	2.05454	1.99244	2.76432	2.33994	1.36665	2.46452	2.13349	2.78103	2.60781	4.77147	1.77224	1.3269	2.06874	1.92805	1.37777	2.12368	1.65194	2.19747	1.40222
Ma02_t13590.1	Ma02_g13590	sp|Q6AZD4|IMP2L_DANRE Mitochondrial inner membrane protease subunit 2 OS=Danio rerio GN=immp2l PE=2 SV=1//4.7867e-24	mRNA	9.65021e-06	0.000135155	0.244889	0.40343	0.00367857	0.25206	3.55179e-05	4.75452e-05	1.66166e-05	0.979104	0.000163042	0.316373	4.21332e-06	6.35384e-06	1.34257e-05	1.06193e-05	0.00080975	0.000824925	0.171231	0.291823	2.30705e-05	1.27636e-05	0.0747136	0.957018
Ma08_t32550.1	Ma08_g32550	sp|Q9LE81|IRE_ARATH Probable serine/threonine protein kinase IRE OS=Arabidopsis thaliana GN=IRE PE=2 SV=1//0	mRNA	0.304348	0.362655	1.05576e-05	1.55335	0.212799	0.761529	1.38978	3.43057e-05	0.232204	0.000258845	0.889857	6.50124e-05	0.397192	1.41968	1.59303	0.000750301	0.21216	0.408127	3.10022e-05	1.7328e-07	1.25813	0.739043	0.000178327	0.471649
Ma08_t32550.3	Ma08_g32550	sp|Q9LE81|IRE_ARATH Probable serine/threonine protein kinase IRE OS=Arabidopsis thaliana GN=IRE PE=2 SV=1//0	mRNA	0.349952	0.517019	0.000244217	0.612564	0.261123	0.426882	0.740739	0.0825485	0.367937	1.04964	0.00244584	0.787011	0.780351	0.00035519	9.4587e-05	5.04063e-11	0.1857	0.362038	5.60208e-05	0.000139915	0.00106487	0.407195	8.78807e-05	0.000159769
Ma08_t32550.2	Ma08_g32550	sp|Q9LE81|IRE_ARATH Probable serine/threonine protein kinase IRE OS=Arabidopsis thaliana GN=IRE PE=2 SV=1//0	mRNA	1.57361	2.00083	2.76627	0.0789227	0.889987	0.283578	1.49605	2.10087	3.07617	1.13699	0.539725	1.60604	0.339945	1.47247	2.32754	1.791	1.29617	1.87381	1.8307	1.41247	0.819795	0.808136	1.64287	1.52365
Ma05_t31890.1	Ma05_g31890	sp|Q84TX2|SCRL1_ORYSJ SCAR-like protein 1 OS=Oryza sativa subsp. japonica GN=Os03g0816900 PE=2 SV=2//2.58957e-85	mRNA	1.18239e-05	8.18937e-05	4.41363e-05	0.000110903	0.037301	1.91957	0.000101461	0.000167876	9.24835e-05	0.00013864	0.337514	0.00068201	8.78481e-05	7.28715e-05	6.01247e-06	0.0185736	0.000171084	0.335215	0.416939	0.531436	1.20931	5.97078e-05	0.0369994	6.35477e-05
Ma07_t27600.1	Ma07_g27600	-//-	mRNA	0.98325	0.127146	2.03819	0.420788	1.332	1.16976	0.606669	0.22689	0.898206	0.812175	0.490809	1.85675	0.883317	1.03163	1.12913	0.516408	1.42411	1.6245	2.28548	1.16346	3.47829	1.36429	0.574936	0.82949
Ma06_t31390.1	Ma06_g31390	sp|Q94CD8|E134_ARATH Glucan endo-1,3-beta-glucosidase 4 OS=Arabidopsis thaliana GN=At3g13560 PE=1 SV=1//9.79345e-178	mRNA	1.48376	4.91704	0.967547	7.41623	3.40385	5.73347	2.65667	0.063053	3.43572	6.54048	2.5884	11.2832	11.8484	4.41822	5.04778	6.59264	3.54156	6.5504	8.32803	4.07411	5.25975	8.82923	2.54458	12.932
Ma06_t31390.2	Ma06_g31390	sp|Q94CD8|E134_ARATH Glucan endo-1,3-beta-glucosidase 4 OS=Arabidopsis thaliana GN=At3g13560 PE=1 SV=1//9.79345e-178	mRNA	0.459856	2.32337	2.9412	3.81502	5.05389	5.78629	4.86175	1.04536	1.25095	7.68284	2.05507	9.94195	4.73644e-12	0.354904	0.000196821	3.49547	0.000225134	4.56934	2.80509	7.78617	3.13981	1.58079	0.61109	5.41759
Ma06_t31390.3	Ma06_g31390	sp|Q94CD8|E134_ARATH Glucan endo-1,3-beta-glucosidase 4 OS=Arabidopsis thaliana GN=At3g13560 PE=1 SV=1//9.79345e-178	mRNA	0.200631	0.642116	0.481242	0.323183	0.262527	0.840944	3.30727e-44	0.127282	0.230637	0.1783	0.226516	0.755414	0.423054	3.41617e-30	0.157103	0.364776	0.418368	0.797	0.92631	0.433312	0.454571	0.091815	0.197859	0.677768
Ma06_t31390.4	Ma06_g31390	sp|Q94CD8|E134_ARATH Glucan endo-1,3-beta-glucosidase 4 OS=Arabidopsis thaliana GN=At3g13560 PE=1 SV=1//9.79345e-178	mRNA	0.456411	3.3755	0.297734	2.26365	1.9821	3.47197	1.48731	0.944121	1.948	3.36023	1.77438	5.36475	3.36994	2.48141	3.61102	4.2544	0.740494	1.91014	4.83078	3.74169	4.41197	3.74813	1.27068	5.45766
Ma06_t31390.5	Ma06_g31390	sp|Q94CD8|E134_ARATH Glucan endo-1,3-beta-glucosidase 4 OS=Arabidopsis thaliana GN=At3g13560 PE=1 SV=1//9.79345e-178	mRNA	3.64361e-11	0.12029	4.84979e-09	0.64019	0.267583	1.01559	0.312506	6.00287e-29	0.383704	0.405245	0.813547	1.28069	0.814641	0.324348	0.399299	0.3835	0.721195	0.473803	1.22027	1.03066	0.624043	0.471752	5.01783e-17	1.12626
Ma06_t31390.6	Ma06_g31390	sp|Q94CD8|E134_ARATH Glucan endo-1,3-beta-glucosidase 4 OS=Arabidopsis thaliana GN=At3g13560 PE=1 SV=1//9.79345e-178	mRNA	0.000352286	0.820293	3.21508e-05	5.49664e-05	0.361865	1.4726	0.00114122	7.21598e-05	0.000109002	0.447186	6.2821e-05	0.364421	0.737858	1.2528	0.000114111	7.97079e-05	3.24317e-12	0.339595	1.60578	1.75583	1.1703	0.000263293	2.30575e-05	0.414132
Ma06_t31390.7	Ma06_g31390	sp|Q94CD8|E134_ARATH Glucan endo-1,3-beta-glucosidase 4 OS=Arabidopsis thaliana GN=At3g13560 PE=1 SV=1//9.79345e-178	mRNA	0.565824	2.75234	1.53927e-05	1.95589	1.03094	2.98146	1.21793e-10	1.9825e-06	1.52515	0.000206665	1.74263	2.49744	3.85995	1.74	2.63779	0.560452	2.42678	0.000366944	2.00867	0.000653207	2.63055	3.2039	4.96582e-05	2.43033
Ma11_t24050.1	Ma11_g24050	-//-	mRNA	10.6289	14.185	11.6157	7.35888	12.7233	12.3179	13.6051	9.10657	9.38288	9.68271	10.7203	9.89695	5.07723	8.66147	9.38399	11.3995	11.0857	12.2428	10.1353	11.5438	10.0228	7.40637	9.31261	13.4174
Ma11_t24050.3	Ma11_g24050	-//-	mRNA	3.24789	2.50827	3.0057	5.24601	2.28956	0.47491	0.888591	1.16036	2.32487	2.84986	1.44395	0.467332	1.40743	2.3906	1.56098	1.81906	3.59684	0.45653	2.06288	1.55007	2.32401	2.25725	1.5975	1.14189e-05
Ma10_t04650.1	Ma10_g04650	sp|P93798|SNAA_VITVI Alpha-soluble NSF attachment protein OS=Vitis vinifera PE=2 SV=1//1.01153e-128	mRNA	89.4454	113.974	128.068	92.3689	102.05	105.233	119.104	158.347	99.7663	111.786	115.179	119.772	78.2371	91.4109	92.7999	100.492	83.9176	98.0603	84.3051	82.9644	92.9236	90.7188	150.564	99.9146
Ma05_t30310.1	Ma05_g30310	-//-	mRNA	3.07407	1.63289	1.30881	3.12238	4.27157	3.40935	1.44565	1.80823	0.951758	2.29139	0.427786	2.61645	3.15557	2.3215	3.71553	5.92921	5.20215	1.10389	8.02503	6.83275	1.56206	2.58162	3.04022	4.56804
Ma03_t15000.1	Ma03_g15000	sp|Q7NML9|CLPS_GLOVI ATP-dependent Clp protease adapter protein ClpS OS=Gloeobacter violaceus (strain PCC 7421) GN=clpS PE=3 SV=1//4.66951e-10	mRNA	1.3592	0.477895	0.787984	1.72008	0.7858	0.304117	1.45047	0.604772	1.3263	1.43688	1.35925	0.875067	1.76562	1.06491	0.890413	0.732189	0.605159	0.959877	0.952348	1.12915	1.77162	1.14449	0.305032	1.33693
Ma10_t29350.1	Ma10_g29350	sp|Q0JIF2|CCB11_ORYSJ Cyclin-B1-1 OS=Oryza sativa subsp. japonica GN=CYCB1-1 PE=2 SV=2//9.64621e-149	mRNA	0.541741	1.6718	3.00187	2.62032	2.13824	3.77074	4.04147	0.904277	2.50972	6.41792	1.73543	7.20442	1.32508	1.38274	1.40425	1.02429	3.24958	2.61246	5.62079	5.15407	11.3315	4.74752	1.56461	7.81496
Ma03_t20290.1	Ma03_g20290	-//-	mRNA	48.5283	46.2031	44.4391	34.3696	39.161	40.7597	42.0554	48.8381	43.439	39.7261	43.6411	42.5278	48.4625	52.8503	55.2207	48.3268	37.7693	42.1112	31.7509	31.6652	32.07	48.3384	48.1797	46.0884
Ma06_t27090.1	Ma06_g27090	-//-	mRNA	0	0	0	207.227	0	0	0	0	0	0	0	0	0	0	0	0	0	0	0	0	0	0	0	0
Ma03_t14930.2	Ma03_g14930	sp|B6ETT4|SYT2_ARATH Synaptotagmin-2 OS=Arabidopsis thaliana GN=SYT2 PE=2 SV=1//1.98505e-12	mRNA	7.11516	7.43408	7.35613	5.2019	5.47878	4.02699	7.47653	14.9236	6.01282	7.09893	7.34651	6.0123	4.74224	5.58156	4.51016	9.74079	8.38507	6.01129	4.52073	4.49886	5.00549	4.29365	9.19538	4.94138
Ma05_t19450.1	Ma05_g19450	sp|Q0WPW5|RMR4_ARATH Receptor homology region, transmembrane domain- and RING domain-containing protein 4 OS=Arabidopsis thaliana GN=RMR4 PE=2 SV=1//1.31627e-11	mRNA	2.06464	2.48883	2.15441	2.95043	2.92799	2.49122	2.50329	4.75692	1.92119	2.5192	2.74396	2.99044	1.59331	2.09863	2.22045	3.08735	2.39984	3.93493	2.86076	2.35727	2.88282	2.51671	2.39229	2.08695
Ma05_t22640.1	Ma05_g22640	-//-	mRNA	0.14131	6.88283e-06	2.06492e-05	0.000140381	0.308342	0.000103825	0.000108218	0	1.77071e-05	0.000293052	2.79095e-06	0.229547	0.674597	2.27841e-05	7.94313e-05	0.000445162	0.204796	0.40692	0.291876	0.564704	2.78617e-05	6.57649e-06	0.195606	1.729e-05
Ma03_t14930.1	Ma03_g14930	sp|B6ETT4|SYT2_ARATH Synaptotagmin-2 OS=Arabidopsis thaliana GN=SYT2 PE=2 SV=1//1.98505e-12	mRNA	0.524288	0.669434	0.405892	1.48614	0.405707	1.33295	0.324384	3.64101	1.55837	2.3638	9.43854e-05	1.15594	1.70653	0.49703	1.75704	0.486061	1.5483	6.89242e-05	0.900042	0.406764	0.000141423	1.03661	2.41569	1.15167
Ma08_t32040.1	Ma08_g32040	-//-	mRNA	0.286835	0.159621	0.307055	0.191849	0.334276	0.176864	0.162483	0.378644	0.0415882	0.394592	0.391341	0.369319	0.0957834	0.155498	0.0862571	0.573901	0.355952	0.289821	0.203883	0.379398	0.535703	0.425795	0.319184	0.248
Ma10_t16560.1	Ma10_g16560	sp|O80809|CLV2_ARATH Leucine-rich repeat receptor-like protein CLAVATA2 OS=Arabidopsis thaliana GN=CLV2 PE=1 SV=1//0	mRNA	2.4389	3.29133	2.7388	4.0336	4.26632	3.17963	3.64674	2.02628	2.18291	3.14419	3.30414	2.84267	2.33017	2.37365	2.38233	3.08219	3.11718	3.56491	3.4825	3.67646	3.43915	3.33158	2.98755	2.65253
Ma04_t09390.1	Ma04_g09390	sp|Q9ZWI7|RER1C_ARATH Protein RER1C OS=Arabidopsis thaliana GN=RER1C PE=2 SV=1//5.93209e-30	mRNA	15.5471	12.9526	21.7914	9.75059	12.3264	10.6666	16.6248	14.0229	13.6277	12.7937	14.6273	15.496	13.0262	11.5536	15.9812	6.62794	7.46931	11.6415	11.0331	11.8857	11.8505	12.6842	10.2428	13.6987
Ma04_t09390.3	Ma04_g09390	sp|Q9ZWI7|RER1C_ARATH Protein RER1C OS=Arabidopsis thaliana GN=RER1C PE=2 SV=1//5.93209e-30	mRNA	0.290768	1.28462e-05	0.189619	0.390043	1.99884e-05	0.232868	1.49899	0.610172	0.384501	0.607722	0.289503	9.08758e-05	0.308565	0.794673	0.538449	1.7738	0.490178	7.81675e-06	1.45734	1.03441	1.11706	5.01961e-05	0.658757	0.406045
Ma04_t09390.2	Ma04_g09390	sp|Q9ZWI7|RER1C_ARATH Protein RER1C OS=Arabidopsis thaliana GN=RER1C PE=2 SV=1//5.93209e-30	mRNA	12.414	5.76019	5.43669	5.21305	3.98876	3.58245	7.32695	12.2315	9.70131	6.294	5.71311	3.73706	12.755	7.61279	10.2352	4.16408	5.37707	4.00416	3.42964	4.65964	2.28511	8.23569	10.8674	5.7066
Ma02_t07420.2	Ma02_g07420	sp|Q9LY87|RGLG2_ARATH E3 ubiquitin-protein ligase RGLG2 OS=Arabidopsis thaliana GN=RGLG2 PE=1 SV=1//1.39213e-178	mRNA	6.99173	3.82756	10.5925	3.86123	7.2745	6.26305	3.84623	14.4295	2.60834	2.75459	3.40931	2.17042	4.7738	8.82325	6.56995	9.50167	8.06626	3.10141	4.03946	2.63431	0.925089	3.06879	10.7856	5.29903
Ma05_t26240.1	Ma05_g26240	sp|Q9SY02|PP301_ARATH Pentatricopeptide repeat-containing protein At4g02750 OS=Arabidopsis thaliana GN=PCMP-H24 PE=3 SV=1//3.38134e-34	mRNA	0.487491	0.370812	0.178325	0.670913	0.510315	0.686431	0.453801	0.0831592	0.54986	0.323557	0.465198	0.2557	0.340083	0.315612	0.371566	0.316082	0.340203	0.589264	0.510581	0.557495	0.379986	0.5233	0.17624	0.777263
Ma09_t00660.1	Ma09_g00660	sp|Q6GQ23|EOGT_XENLA EGF domain-specific O-linked N-acetylglucosamine transferase OS=Xenopus laevis GN=eogt PE=2 SV=1//8.0357e-06	mRNA	18.7478	45.0002	21.7573	38.5138	21.1279	20.518	41.0417	19.461	31.5725	46.692	41.3919	53.1793	20.7108	18.4714	20.1218	15.7499	16.5384	20.6859	27.4498	23.906	32.8895	33.8219	12.7757	33.8907
Ma03_t10220.2	Ma03_g10220	sp|Q91YE6|IPO9_MOUSE Importin-9 OS=Mus musculus GN=Ipo9 PE=1 SV=3//1.04785e-114	mRNA	0.806349	2.2893	0.153077	1.42319	0.867439	0.473059	1.25345	2.32994	0.94695	1.18777	1.2377	1.03551	2.20344	0.995991	2.32978	1.58233	1.00351	0.927264	0.838726	0.343822	0.34979	1.80969	2.82879	0.876056
Ma03_t10220.1	Ma03_g10220	sp|Q91YE6|IPO9_MOUSE Importin-9 OS=Mus musculus GN=Ipo9 PE=1 SV=3//1.04785e-114	mRNA	6.73825	7.68369	8.60034	8.04083	7.39854	6.95862	8.44676	7.00735	9.93556	6.5404	7.77615	7.23924	5.48347	9.32152	7.71118	6.57107	7.82913	8.76897	3.76184	5.09202	8.56482	7.35496	7.40961	7.14646
Ma01_t08690.1	Ma01_g08690	sp|Q5WJI0|GUAA_BACSK GMP synthase [glutamine-hydrolyzing] OS=Bacillus clausii (strain KSM-K16) GN=guaA PE=3 SV=1//7.316e-56	mRNA	0.37216	1.38925	2.67247	2.99977	2.39842	2.32163	1.40484	0.738153	1.07907	1.75343	1.601	1.77989	1.60943	0.948119	1.01966	3.07162	2.15397	2.85314	2.28901	2.21463	1.45491	1.59252	0.930563	1.55463
Ma01_t15070.4	Ma01_g15070	-//-	mRNA	0.872217	2.2858	1.75137	0.452685	0.300289	1.60193	4.34529	0.469861	1.94022	1.09485	1.73545	2.31924	2.20798	2.12051	2.23559	1.14657	0.292319	0.455175	1.83574	1.0787	1.11075	2.56956	1.85569	1.66646
Ma01_t15070.5	Ma01_g15070	-//-	mRNA	0.224261	0.795003	1.7389	7.2411e-06	1.35873e-05	3.15391e-09	1.44182	0.49507	0.595195	1.97399	0.601171	0.573974	0.322576	0.557667	0.808012	2.45967e-07	9.35199e-06	0.255846	9.01792e-06	0.286948	4.60186e-06	0.424531	0.374314	6.62914e-06
Ma01_t15070.2	Ma01_g15070	-//-	mRNA	26.367	29.7362	20.0367	16.9007	15.1515	12.8058	35.681	26.0102	30.3436	27.6245	32.4912	16.683	20.2569	22.0747	19.079	12.1951	13.4309	15.6215	14.4064	9.68437	20.8633	19.5754	17.2337	23.4269
Ma01_t15070.3	Ma01_g15070	-//-	mRNA	1.23945	1.31849	4.17071e-06	1.44681	0.805095	0.000188091	4.69418	2.47404e-05	0.776512	1.4873	2.35006	1.44364	1.08452	1.47862	3.72396	0.000107447	0.428273	2.4078	0.400526	9.53211e-06	0.300044	0.792845	2.59777	0.320074
Ma02_t05880.1	Ma02_g05880	sp|Q9S7G7|MB3R1_ARATH Myb-related protein 3R-1 OS=Arabidopsis thaliana GN=MYB3R-1 PE=2 SV=1//1.08177e-69	mRNA	1.55759	5.01004	2.95489	1.13936	1.09433	1.57201	1.33685	3.74305	7.5914	1.11936	1.23658	1.47928	1.07254	2.99894	4.14639	1.09616	1.98171	0.50792	1.26026	1.68264	1.38081	1.1936	1.93395	1.29515
Ma01_t15070.1	Ma01_g15070	-//-	mRNA	5.11791	3.57905	6.73297	2.9856	2.75875	3.24017	6.14408	3.39408	4.74359	5.33034	6.23058	4.48573	2.16731	1.45412	2.22372	3.66661	2.00141	4.17108	1.77101	4.78845	2.2781	5.42094	1.62154	1.7511
Ma00_t02750.1	Ma00_g02750	-//-	mRNA	4.93956	4.19626	7.98026	5.1546	6.8997	6.67091	2.80035	5.26041	5.46677	3.37882	4.25631	3.15585	6.25121	10.8311	12.866	9.33008	4.49473	4.16306	5.22008	4.58702	4.24953	5.76912	7.72134	5.73069
Ma04_t36780.2	Ma04_g36780	sp|Q4FE47|XB35_ARATH Putative E3 ubiquitin-protein ligase XBAT35 OS=Arabidopsis thaliana GN=XBAT35 PE=2 SV=1//1.23228e-06	mRNA	2.35437	2.70105	2.80428	2.83435	1.75333	1.20591	2.17561	0.238979	1.488	1.44626	4.16016	2.2066	3.06357	1.21138	1.09605	2.89421	1.54294	2.87543	2.72949	2.23181	2.30146	2.49073	0.314403	0.913841
Ma03_t18730.1	Ma03_g18730	sp|Q5N9N2|P2C09_ORYSJ Probable protein phosphatase 2C 9 OS=Oryza sativa subsp. japonica GN=Os01g0846300 PE=2 SV=1//1.60338e-113	mRNA	8.79287	2.38032	26.2477	10.0871	53.2313	49.4509	10.9058	6.89702	3.08956	7.45373	8.34302	20.7995	14.6937	10.8977	8.8217	7.74222	5.16367	30.5687	53.3019	43.931	23.8337	19.9671	8.62615	16.432
Ma03_t19600.3	Ma03_g19600	-//-	mRNA	5.82883	5.13586	4.73587	5.09411	5.05272	4.9154	5.09469	4.60212	5.12107	3.72972	5.21272	3.8276	4.93075	7.51381	6.47499	5.9806	6.41751	5.04136	3.06586	3.24785	3.83605	4.74972	3.9791	4.36667
Ma03_t19600.2	Ma03_g19600	-//-	mRNA	1.95039	0.586535	0.00153613	0.000148634	0.000106938	7.66114e-05	0.0222509	0.111251	1.77676	3.76263e-05	1.00965	7.90714e-05	1.19699	4.99126	4.93888	1.9239e-05	0.297579	0.000205797	0.000488335	0.000189887	2.92867e-05	0.131001	3.3062	0.52982
Ma03_t19600.1	Ma03_g19600	-//-	mRNA	0.668023	3.13446e-06	1.93733e-11	0.546896	3.44455e-06	0.160353	1.4296e-14	0.332909	5.61223e-05	2.07805e-05	0.700664	0.26853	0.000117048	0.613943	0.000237349	9.36639e-05	0.258367	1.61395e-07	6.28629e-10	6.4616e-06	0.278813	2.37398e-12	5.12413e-05	0.720844
Ma03_t19600.5	Ma03_g19600	-//-	mRNA	1.4315	1.58505	4.70774	1.02589	1.57684	1.80867	2.05959	2.29918	2.67976	1.14977	0.794563	1.03305	2.00003	2.40373	1.85741	2.28153	0.697523	1.8314	2.06165	1.86899	1.37175	2.41329	4.01665	1.2723
Ma03_t19600.4	Ma03_g19600	-//-	mRNA	1.40443	0.519231	1.10451	3.09961e-08	4.23471e-08	0.442682	2.34171e-12	2.19586	1.37907	0.337187	0.31505	0.38974	1.16789	0.452864	1.39736	0.468841	0.221025	0.269007	5.9731e-08	0.257698	2.81638e-05	0.859238	1.60178	0.000280293
Ma06_t25130.1	Ma06_g25130	-//-	mRNA	0	0	0	0	0	0	0	0	0	0	0	0	0	0	0	0	0	0	0	0	0	0.379204	0	0.482217
Ma03_t01960.1	Ma03_g01960	sp|Q54BC9|DYRK2_DICDI Probable serine/threonine-protein kinase dyrk2 OS=Dictyostelium discoideum GN=dyrk2 PE=3 SV=1//1.0937e-61	mRNA	15.5564	14.0521	16.0196	18.7513	16.6942	19.785	13.9595	24.2788	14.5204	17.4677	13.9829	15.3201	16.5944	17.4068	16.8503	20.2797	19.0158	17.265	16.6811	15.3898	14.0194	14.0743	22.3553	14.0208
Ma09_t22460.1	Ma09_g22460	-//-	mRNA	5.20285	3.26201	1.4639	2.30844	0.45209	0.509848	3.52782	0.739864	4.15672	3.86477	4.66207	2.23344	3.55531	1.92245	1.87602	1.10457	2.9513	3.07386	1.80334	1.94215	6.39862	4.81536	0.606457	3.05171
Ma09_t02570.1	Ma09_g02570	sp|Q9FMC8|OPF13_ARATH Transcription repressor OFP13 OS=Arabidopsis thaliana GN=OFP13 PE=2 SV=1//4.76e-21	mRNA	0	0.0630757	0.121337	0	0.264065	0.210364	0.255797	0	0.245568	0.199594	0	0.311563	0.0564303	0.122953	0.0513164	0	0.14008	0.136778	0.801872	0.298677	0.884012	0.0558014	0	0.352873
Ma01_t19510.1	Ma01_g19510	sp|P49693|RL193_ARATH 60S ribosomal protein L19-3 OS=Arabidopsis thaliana GN=RPL19C PE=2 SV=3//2.90445e-60	mRNA	53.0907	57.8035	66.8051	68.5289	64.1224	75.8922	69.0895	28.9013	73.3323	54.6974	67.7392	63.2556	70.5853	67.0009	73.3487	71.5996	49.8887	63.8766	68.4135	68.9055	59.0948	70.2203	48.1274	69.4645
Ma05_t16310.1	Ma05_g16310	-//-	mRNA	0.895168	0	0	1.27759	1.56842	4.39924	0	0	0	0	1.42806	0	0	2.99895	0	0	0	1.10361	0	0	0.972971	1.81136	0	1.31148
Ma11_t22080.1	Ma11_g22080	sp|O80920|PYL4_ARATH Abscisic acid receptor PYL4 OS=Arabidopsis thaliana GN=PYL4 PE=1 SV=1//6.48156e-68	mRNA	0.109687	2.2232	0.137959	0.451538	0.600238	0	0.217364	1.52325	1.11311	1.28102	0.375516	1.9067	0.510573	0.419567	0.351209	0.384071	4.36419	0.542045	0.635585	0.338437	1.42873	0.50532	0.42656	0.869454
Ma05_t07610.1	Ma05_g07610	sp|Q9FWR5|GCA1_ARATH Gamma carbonic anhydrase 1, mitochondrial OS=Arabidopsis thaliana GN=GAMMACA1 PE=1 SV=1//3.8976e-166	mRNA	40.4655	45.2313	26.2591	22.2848	20.3971	22.4909	48.6451	50.8513	33.3484	38.7168	40.3626	42.0468	41.6357	41.4988	40.2538	27.6302	23.8171	35.703	39.4962	30.8953	36.9751	38.4087	42.6909	50.5707
Ma03_t08180.1	Ma03_g08180	-//-	mRNA	7.60318	32.9686	23.3801	39.8893	27.2454	26.9399	20.74	5.82425	13.8398	24.934	21.3905	32.9952	9.0712	7.65363	9.12582	17.6894	23.3015	11.1022	29.8138	33.3894	27.8547	13.1991	9.66918	27.3997
Ma10_t04490.1	Ma10_g04490	sp|Q8LGD5|MKS1_ARATH Protein MKS1 OS=Arabidopsis thaliana GN=MKS1 PE=1 SV=2//6.88401e-13	mRNA	3.03969	1.12685	0.689714	2.17058	1.55549	0.453727	2.13944	3.73828	2.24372	2.77003	4.36089	1.42319	3.69284	1.09764	1.61802	6.15094	4.51549	3.79807	2.22652	2.74142	1.65216	2.0516	2.15285	1.90985
Ma03_t07540.1	Ma03_g07540	sp|Q9SIS4|IP5P9_ARATH Type IV inositol polyphosphate 5-phosphatase 9 OS=Arabidopsis thaliana GN=IP5P9 PE=1 SV=1//4.89933e-138	mRNA	0.0279185	0.0720278	0	0	0.0754795	0	0	0.0643806	0.113355	0.0384517	0	0.0359453	0.458702	0	0	0.0977522	0.525799	0.039563	0.0463822	0.344751	0.146505	0.129239	0	0.10068
Ma05_t11040.1	Ma05_g11040	sp|Q9MAM3|KCS1_ARATH 3-ketoacyl-CoA synthase 1 OS=Arabidopsis thaliana GN=KCS1 PE=2 SV=1//0	mRNA	3.80807	4.27878	20.1869	20.2317	43.9924	46.779	17.2253	0.889027	15.3205	8.99937	9.11312	31.4272	28.1832	19.2545	19.6725	14.009	4.70565	15.2158	41.3672	39.4204	26.6643	15.9314	2.87792	27.378
Ma01_t19500.1	Ma01_g19500	sp|Q9M9W1|RL222_ARATH 60S ribosomal protein L22-2 OS=Arabidopsis thaliana GN=RPL22B PE=2 SV=1//1.02393e-39	mRNA	0	0	0	0	0	0	0	0	0	0	0	0	0	0	0	0	0	0	0	0	0	0	0	0
Ma03_t21950.1	Ma03_g21950	sp|P58223|Y4837_ARATH KH domain-containing protein At4g18375 OS=Arabidopsis thaliana GN=At4g18375 PE=2 SV=1//7.1648e-59	mRNA	7.69579	6.18618	5.93389	7.46439	10.2632	10.8777	7.62018	10.2243	9.05329	6.12508	9.18273	8.50021	7.89509	6.92855	7.93724	8.28852	7.3731	8.97587	8.53251	7.32003	10.5879	11.4554	10.5233	6.70142
Ma03_t21950.2	Ma03_g21950	sp|P58223|Y4837_ARATH KH domain-containing protein At4g18375 OS=Arabidopsis thaliana GN=At4g18375 PE=2 SV=1//7.1648e-59	mRNA	23.9911	19.2648	21.4612	24.9688	19.3198	21.0353	16.6854	22.6567	19.528	20.1715	20.9579	16.745	20.1217	22.2534	22.4934	20.0165	22.241	18.5345	14.6317	17.0774	17.0223	15.9522	19.8836	17.6764
Ma03_t21950.3	Ma03_g21950	sp|P58223|Y4837_ARATH KH domain-containing protein At4g18375 OS=Arabidopsis thaliana GN=At4g18375 PE=2 SV=1//7.1648e-59	mRNA	0.00307022	1.36423	8.89882e-05	0.0010273	0.00432885	0.0904493	1.58662	0.00743564	0.00596408	2.43646	0.00197499	0.000797753	0.0174058	0.000308781	0.000189605	4.97854	7.97034	0.208678	7.01268	4.59462	0.134245	0.00197456	0.000917298	0.0038739
Ma06_t03110.1	Ma06_g03110	-//-	mRNA	0	0	0	0	0	0	0	0	0	0	0	0	0	0	0	0	0	0	0	0	0	0	0	0
Ma10_t03150.1	Ma10_g03150	sp|P0C7P8|LHWL1_ARATH Transcription factor EMB1444 OS=Arabidopsis thaliana GN=EMB1444 PE=2 SV=1//4.10143e-17	mRNA	0	0.0975439	0	0.131963	0.153238	0	0	0	0.0381874	0.0517747	0	0.0484434	0	0.0950036	0.0394685	0	0.108963	0.0532469	0.0624286	0.290322	0.0984641	0.2608	0	0.0454612
Ma09_t20520.1	Ma09_g20520	-//-	mRNA	4.29445	8.9078	8.81828	7.09154	12.928	11.078	7.321	9.73423	5.41771	6.18431	7.39069	6.04614	3.65982	3.60283	3.16557	11.2423	7.26372	6.75689	10.8514	8.48521	6.29785	4.58828	8.83261	9.08067
Ma10_t26360.2	Ma10_g26360	sp|P48488|PP1_MEDSV Serine/threonine-protein phosphatase PP1 OS=Medicago sativa subsp. varia GN=PP1 PE=2 SV=1//0	mRNA	9.76767	10.8541	8.33696	8.88356	9.57569	9.00976	13.1809	20.5641	11.8556	11.4519	11.8917	10.2163	9.18387	9.18208	10.3983	8.05329	8.30276	6.72358	8.75795	9.12264	8.81478	10.8643	15.7173	10.8991
Ma10_t26360.3	Ma10_g26360	sp|P48488|PP1_MEDSV Serine/threonine-protein phosphatase PP1 OS=Medicago sativa subsp. varia GN=PP1 PE=2 SV=1//0	mRNA	4.05216	4.72129	7.6439	3.71156	3.76616	5.59883	4.12349	5.30209	3.53955	3.41213	5.23187	5.25922	3.17111	4.48516	4.62606	4.28909	3.18721	5.24404	2.88725	4.14073	3.29982	3.9871	5.10816	4.64068
Ma06_t36810.1	Ma06_g36810	sp|P40978|RS19_ORYSJ 40S ribosomal protein S19 OS=Oryza sativa subsp. japonica GN=RPS19A PE=3 SV=1//4.75178e-86	mRNA	98.259	123.644	156.016	111.139	101.975	98.4704	195.577	103.014	123.415	160.05	193.877	143.357	87.515	95.3042	81.4962	77.6123	73.1534	157.904	127.829	114.841	157.334	135.295	90.4132	122.761
Ma02_t20390.1	Ma02_g20390	-//-	mRNA	132.969	134.984	100.541	107.147	150.977	138.894	131.108	172.652	76.3149	138.631	134.199	139.751	95.7878	105.826	91.9179	169.757	152.067	141.472	197.853	206.669	132.391	101.541	152.987	161.211
Ma06_t34420.1	Ma06_g34420	-//-	mRNA	49.5531	6.9363	11.236	11.2894	15.2902	9.67656	11.4498	26.3269	7.12076	14.8635	21.2188	4.84947	6.52604	8.87706	11.6986	13.5399	13.0309	8.52963	7.88229	8.65852	4.66996	4.25142	13.042	6.18158
Ma10_t01560.1	Ma10_g01560	sp|Q9M5Q1|FUT1_PEA Galactoside 2-alpha-L-fucosyltransferase OS=Pisum sativum GN=FT1 PE=2 SV=1//5.45878e-156	mRNA	0	0	0	0	0	0	0	0	0	0	0	0	0	0	0	0	0	0	0	0	0	0	0	0
Ma11_t20650.2	Ma11_g20650	sp|P12859|G3PB_PEA Glyceraldehyde-3-phosphate dehydrogenase B, chloroplastic OS=Pisum sativum GN=GAPB PE=2 SV=2//0	mRNA	0	0	0	0.0251447	0	0	0	0	0	0	0	0	0	0	0	0	0	0	0.0355481	0	0	0	0	0
Ma09_t19830.1	Ma09_g19830	-//-	mRNA	104.786	10.8346	22.6949	1.46527	27.3695	6.3151	8.0413	22.8037	5.00224	24.1116	35.3914	1.7786	3.73888	14.2326	24.4868	6.91474	5.10571	3.2796	4.17061	2.73231	1.4867	0.88699	25.3285	2.08033
Ma10_t15310.1	Ma10_g15310	sp|Q6ZI17|OML2_ORYSJ Protein MEI2-like 2 OS=Oryza sativa subsp. japonica GN=ML2 PE=2 SV=1//0	mRNA	30.2373	14.6023	18.8064	11.9551	16.2016	14.7727	15.4659	145.634	12.4954	24.0478	13.1983	7.8551	13.8454	12.865	13.8007	18.5822	20.2894	13.5855	10.7627	13.2099	7.85699	9.95719	56.7537	8.15243
Ma04_t25400.1	Ma04_g25400	sp|Q94C59|PATL4_ARATH Patellin-4 OS=Arabidopsis thaliana GN=PATL4 PE=1 SV=2//9.8729e-107	mRNA	0.0794187	0.153051	0	1.17657	0.106975	0.168024	0.026263	0.548818	0.020155	0.875685	0.161623	0.230061	0.186882	0.0248157	0.0204658	0.139034	0.402851	0.0281667	1.05663	1.01151	0.052207	0.0460215	0.11626	0.404005
Ma10_t15310.2	Ma10_g15310	sp|Q6ZI17|OML2_ORYSJ Protein MEI2-like 2 OS=Oryza sativa subsp. japonica GN=ML2 PE=2 SV=1//0	mRNA	20.0932	8.58073	9.0074	7.63434	11.7319	8.83941	9.42424	77.0206	4.02642	17.111	8.16233	6.0999	6.2083	10.6491	7.71723	12.2883	19.4655	8.73984	7.7706	7.37386	6.94213	6.94607	39.2133	6.60789
Ma05_t21310.1	Ma05_g21310	sp|Q9FFW5|PERK8_ARATH Proline-rich receptor-like protein kinase PERK8 OS=Arabidopsis thaliana GN=PERK8 PE=1 SV=1//1.4009e-72	mRNA	0.197847	0.253342	0.0812217	0.152905	0.28343	0.147911	0.349023	0.121419	0.174072	0.545699	0.214359	0.15283	0.233271	0.0328475	0.0945544	0.0461808	0.28683	0.0936431	0.153682	0.203652	0.17372	0.443838	0.0257632	0.0943929
Ma01_t03570.1	Ma01_g03570	sp|Q42971|ENO_ORYSJ Enolase OS=Oryza sativa subsp. japonica GN=ENO1 PE=1 SV=2//0	mRNA	88.3185	111.043	111.422	92.4787	48.2543	54.1803	133.584	90.9004	120.054	119.304	136.995	104.922	64.576	79.361	86.7866	30.5179	39.9071	57.5478	50.31	53.8121	76.5913	85.8054	45.6307	72.1566
Ma09_t27210.1	Ma09_g27210	sp|Q9ZW91|FB318_ARATH Probable F-box protein At1g67160 OS=Arabidopsis thaliana GN=At1g67160 PE=4 SV=1//3.03066e-08	mRNA	0	0	0	0	0	0	0	0	0	0	0	0	0	0	0.0347806	0	0	0	0	0	0	0	0	0
Ma04_t08790.1	Ma04_g08790	sp|Q8RWA2|MED9_ARATH Mediator of RNA polymerase II transcription subunit 9 OS=Arabidopsis thaliana GN=MED9 PE=1 SV=1//1.85887e-23	mRNA	31.2143	33.6096	34.5751	26.6773	29.8205	31.1141	30.0386	36.5401	26.2181	25.1876	33.992	23.5907	32.2709	26.7849	26.3681	36.5733	29.813	29.247	22.8082	25.3521	24.1578	29.229	40.365	27.5678
Ma03_t15080.1	Ma03_g15080	-//-	mRNA	0.219594	0.0966202	0.371738	0.25995	0.100969	0.217276	0	0	0.148538	0.100409	0	0.282774	0.338779	0	0.159208	0.256311	0.10581	0.103094	0.120899	0.112884	0.853941	0.168059	0	0.180309
Ma10_t26850.1	Ma10_g26850	sp|P51819|HSP83_IPONI Heat shock protein 83 OS=Ipomoea nil GN=HSP83A PE=2 SV=1//0	mRNA	98.1975	80.2028	121.962	74.5551	63.0963	78.3776	120.731	27.1829	116.187	77.8922	111.5	101.876	86.3994	84.9942	87.5455	42.5369	35.5139	82.8948	74.6	67.7248	103.658	97.4894	35.9404	72.6119
Ma02_t04170.1	Ma02_g04170	-//-	mRNA	6.16621	9.11538	9.2645	9.36737	7.62806	10.079	8.1037	10.8023	7.98886	7.7375	5.53565	8.68651	6.41084	6.45199	5.35778	6.09609	7.45873	5.18555	7.64474	7.72503	7.64415	6.99966	7.2084	9.54737
Ma10_t15300.1	Ma10_g15300	sp|Q9ASX9|BH144_ARATH Transcription factor bHLH144 OS=Arabidopsis thaliana GN=BHLH144 PE=1 SV=1//2.19214e-25	mRNA	2.10276	2.15567	3.4079	3.4513	5.14376	5.22148	2.62839	3.2881	3.11374	2.44629	1.62247	2.53337	3.0193	2.77195	3.25937	9.76018	12.8893	4.9539	4.5882	5.24171	3.32304	3.04098	3.31373	3.60109
Ma05_t13110.1	Ma05_g13110	sp|Q9M8Z7|U80A2_ARATH Sterol 3-beta-glucosyltransferase UGT80A2 OS=Arabidopsis thaliana GN=UGT80A2 PE=1 SV=1//2.68743e-74	mRNA	6.5703	6.88178	5.07465	7.95717	6.78423	9.99013	7.34304	3.36308	8.72686	6.1858	6.80398	6.6997	9.7826	9.33168	10.9875	8.49196	9.19185	15.4006	6.65259	8.64145	8.98574	11.856	5.23635	6.57621
Ma07_t28200.1	Ma07_g28200	sp|Q94F39|AFP3_ARATH Ninja-family protein AFP3 OS=Arabidopsis thaliana GN=AFP3 PE=1 SV=1//1.2696e-12	mRNA	17.2189	6.49302	23.0489	14.939	28.2722	34.0041	11.7121	8.38238	8.93693	10.1603	15.7405	13.9436	15.6454	15.9933	14.4623	13.5946	11.7777	21.4253	24.9021	22.6907	18.1355	16.7471	8.05463	12.5995
Ma06_t05770.1	Ma06_g05770	-//-	mRNA	0.0693865	0.148819	0.20039	0.134524	0.155995	0.130887	0.183542	0.266503	0.328692	0	0.157032	0.29778	0.0815531	0.231691	0.35876	0.0809811	0.335149	0.0983907	0.115346	0.17852	0.455723	0.0803688	0.270767	0.305052
Ma07_t07870.1	Ma07_g07870	sp|Q10G56|OAT_ORYSJ Ornithine aminotransferase, mitochondrial OS=Oryza sativa subsp. japonica GN=OAT PE=2 SV=1//2.85857e-22	mRNA	0	0	0	0.828422	0	0	0.421311	0	0.326227	0	0	0	0	0	0	0	0	0	0	0	0	0	0	0
Ma03_t19270.1	Ma03_g19270	-//-	mRNA	0	0	0	0	0	0	0	0	0	0	0	0	0	0	0	0	0	0	0	0	0	0	0	0
Ma04_t18040.1	Ma04_g18040	-//-	mRNA	0	0	0	0	0	0	0	0	0	0	0	0	0	0	0	0	0	0	0	0	0	0	0	0
Ma05_t25450.2	Ma05_g25450	sp|B9G125|GDT15_ORYSJ GDT1-like protein 5 OS=Oryza sativa subsp. japonica GN=Os08g0433100 PE=2 SV=1//8.52331e-113	mRNA	66.2774	93.1999	92.2317	58.7188	51.9341	49.35	89.5252	103.789	69.6952	79.0649	91.4893	60.7321	48.4605	62.6085	52.564	54.5405	53.9724	59.4644	47.0588	52.4287	53.0844	57.6485	80.9193	62.0168
Ma05_t25450.1	Ma05_g25450	sp|B9G125|GDT15_ORYSJ GDT1-like protein 5 OS=Oryza sativa subsp. japonica GN=Os08g0433100 PE=2 SV=1//8.52331e-113	mRNA	29.2059	37.8309	53.6024	32.6896	33.9611	23.1834	40.3708	67.9635	31.248	41.2958	45.4199	34.837	17.6138	26.8544	26.0711	29.2097	21.2501	32.749	29.7134	24.5913	32.0197	32.7516	55.2124	31.83
Ma04_t29940.2	Ma04_g29940	-//-	mRNA	10.3867	18.3628	19.4518	19.7328	19.0384	23.4981	14.7845	16.5717	13.0903	15.2023	16.128	20.2058	14.4426	8.99811	9.61398	22.4533	20.0245	17.9551	19.9682	16.5271	17.4948	19.4123	17.1423	17.8245
Ma04_t29940.3	Ma04_g29940	-//-	mRNA	0.324519	5.25213e-09	3.00673e-11	0.0992682	0.0725973	0.34393	0.47516	0.431249	0.000306099	6.08906e-05	0.145897	0.156566	1.28209	0.492887	0.299807	0.569016	0.0775483	0.796013	1.05342e-13	0.15663	0.136701	1.32638	0.966195	0.816485
Ma04_t29940.1	Ma04_g29940	-//-	mRNA	1.31859	0.630206	4.93225e-11	1.37442	0.116051	0.35232	1.09306e-05	0.439424	0.943991	8.23083e-05	0.266879	0.316825	0.676148	1.53929	0.92883	6.93383e-09	0.236427	0.818418	1.82616e-13	1.05536	0.23678	0.340894	2.1802e-06	0.556937
Ma04_t29940.4	Ma04_g29940	-//-	mRNA	9.09385	0.000212257	0.00026644	2.08465e-06	0.000110972	0.000104209	0.000157105	9.78208e-05	5.034	0.591803	0.744579	0.000121052	8.16475	11.1284	13.8255	0.21378	0.00131926	0.000317633	0.00051694	2.51066e-33	0.313491	0.00137777	5.55288e-05	0.00322276
Ma06_t24130.1	Ma06_g24130	-//-	mRNA	0.24733	0.451552	1.48909	0.406497	0.540082	1.65019	1.0458	0.91525	1.95783	0.611981	0.473491	1.21016	1.38385	1.44616	1.20771	0.0866017	0.644283	0.419357	0	0.534247	0.451664	0.969442	0.192479	1.50372
Ma04_t37840.1	Ma04_g37840	sp|Q9M1S8|GCP2_ARATH Probable glutamate carboxypeptidase 2 OS=Arabidopsis thaliana GN=AMP1 PE=1 SV=3//1.74721e-158	mRNA	0.425003	0.509703	0.263976	1.45148	0.862695	0.302682	0.441545	0.840335	0.585459	0.83603	0.908624	0.820798	0.42719	0.763376	0.72718	0.478313	1.49511	1.67718	0.907523	1.31197	1.393	1.0535	0.946962	0.657699
Ma05_t11530.1	Ma05_g11530	sp|Q9LUS3|PP237_ARATH Pentatricopeptide repeat-containing protein At3g16610 OS=Arabidopsis thaliana GN=PCMP-E91 PE=2 SV=1//0	mRNA	2.63919	2.97464	2.47612	3.41906	2.54673	2.85871	2.40174	1.60787	2.47813	2.44624	2.52702	1.98762	2.89286	3.1515	2.35464	2.30097	2.7528	3.5266	2.43175	2.81878	2.61237	2.21617	1.63054	2.01272
Ma05_t17330.1	Ma05_g17330	sp|Q9BZG8|DPH1_HUMAN Diphthamide biosynthesis protein 1 OS=Homo sapiens GN=DPH1 PE=1 SV=2//8.37918e-98	mRNA	4.22326	2.26826	2.75075	2.54223	2.86934	2.27298	3.55504	2.25497	3.91692	2.48721	3.85389	2.7928	3.75006	2.92609	3.65834	2.41966	1.91974	2.58738	2.68196	3.46744	2.82719	3.18185	1.79863	3.23868
Ma08_t15230.1	Ma08_g15230	-//-	mRNA	122.794	110.088	100.62	70.5054	73.4523	55.376	144.446	109.264	116.459	128.014	131.869	102.849	122.235	125.05	122.571	70.6177	54.0469	99.6129	97.6097	98.4824	90.7248	115.433	143.335	130.129
Ma11_t23100.1	Ma11_g23100	sp|Q9MB58|F26_ARATH 6-phosphofructo-2-kinase/fructose-2,6-bisphosphatase OS=Arabidopsis thaliana GN=FKFBP PE=1 SV=1//0	mRNA	7.20927	11.8174	8.22699	13.2296	12.8265	12.7053	8.13056	7.44274	9.03827	9.3238	9.14	11.1198	9.40541	10.4284	10.1292	18.8453	19.7052	15.8402	12.2316	13.314	11.7235	11.06	12.1665	12.4778
Ma04_t10020.1	Ma04_g10020	-//-	mRNA	4.8975e-05	0.256439	1.97357e-05	0.890967	0.476455	0.362467	0.536826	0.244998	0.241882	0.405909	0.132445	0.547345	3.03848e-05	0.33284	0.245745	1.83594e-05	0.553026	0.000103296	3.81346e-05	0.387761	0.53125	1.4402e-05	0.753533	3.36898e-05
Ma04_t10020.2	Ma04_g10020	-//-	mRNA	1.05793	1.29105	1.30258	0.728319	0.960403	0.731095	0.812343	3.4356	1.21547	1.08746	1.06124	1.10594	0.683198	1.17182	0.9915	0.661451	0.560173	0.912051	0.922467	0.584118	1.42586	1.11081	1.16458	1.2014
Ma08_t18690.5	Ma08_g18690	sp|Q9M7I9|STEP1_ARATH Stress enhanced protein 1, chloroplastic OS=Arabidopsis thaliana GN=SEP1 PE=2 SV=1//5.2792e-23	mRNA	3.88787	6.69372	5.71304	4.5785	6.68817	4.70381	5.29921	1.80808	8.19869	6.65933	6.88851	9.09345	4.03066	7.27398	6.43408	7.92694	6.59116	7.42979	5.30685	6.62789	4.07648	6.27158	4.79877	5.62413
Ma05_t17470.1	Ma05_g17470	-//-	mRNA	0	0	0	0	0	0	0	0	0	0	0	0	0	0	0	0	0	0	0	0	0	0	0	0
Ma02_t13750.1	Ma02_g13750	sp|Q9UUH7|GYP7_SCHPO GTPase-activating protein gyp7 OS=Schizosaccharomyces pombe (strain 972 / ATCC 24843) GN=gyp7 PE=3 SV=1//4.01022e-11	mRNA	8.89573	10.3597	9.18293	10.7038	13.3488	13.4536	7.76241	7.87825	10.4719	8.20728	7.46804	9.88912	11.2208	10.4181	10.974	11.3505	10.9105	9.1771	9.53431	10.6703	7.96777	9.93798	8.24994	10.6732
Ma06_t03560.1	Ma06_g03560	sp|Q0E1D7|FLP3_ORYSJ Flowering-promoting factor 1-like protein 3 OS=Oryza sativa subsp. japonica GN=Os02g0460200 PE=2 SV=1//7.08649e-43	mRNA	0	0	0	0	0	0	0	0	0	0	0	0	0	0	0	0	0	0	0	0	0	0	0	0
Ma06_t00320.1	Ma06_g00320	sp|Q6Z8K4|MUB3_ORYSJ Membrane-anchored ubiquitin-fold protein 3 OS=Oryza sativa subsp. japonica GN=MUB3 PE=3 SV=1//2.70788e-55	mRNA	6.27747	3.77048	3.64422	4.28557	5.2411	5.99044	2.2736	4.70582	5.77668	4.99071	5.70401	5.03395	3.89229	4.66497	4.9998	4.59221	4.39789	3.48181	5.64513	5.26699	4.25088	3.92028	6.11745	5.96488
Ma06_t00320.2	Ma06_g00320	sp|Q6Z8K4|MUB3_ORYSJ Membrane-anchored ubiquitin-fold protein 3 OS=Oryza sativa subsp. japonica GN=MUB3 PE=3 SV=1//2.70788e-55	mRNA	6.80424	6.39877	7.70384	6.40528	6.00284	7.32182	4.43846	9.09363	4.94418	5.02918	7.15835	6.37796	5.848	6.37746	8.24042	7.13677	8.11795	6.05124	4.76521	6.41074	8.05257	7.81392	6.66184	5.52368
Ma07_t06010.2	Ma07_g06010	sp|Q9XI84|RBCMT_ARATH [Fructose-bisphosphate aldolase]-lysine N-methyltransferase, chloroplastic OS=Arabidopsis thaliana GN=LSMT-L PE=1 SV=1//7.0627e-11	mRNA	8.06223	10.8494	10.1013	19.0272	12.6101	11.6392	15.0788	8.02135	11.3619	12.8574	13.2497	13.2842	8.47451	8.26668	7.86023	13.6335	15.1559	17.4215	12.524	12.5343	18.1695	12.8513	10.2153	11.7782
Ma10_t07250.2	Ma10_g07250	sp|Q8H383|ALFL2_ORYSJ PHD finger protein ALFIN-LIKE 2 OS=Oryza sativa subsp. japonica GN=Os07g0233300 PE=2 SV=1//4.82765e-79	mRNA	0.270818	2.73574e-06	4.68597e-06	0.315736	0.277898	0.369509	0.316333	0.55132	0.598051	0.782722	0.213918	6.5442e-06	6.47278e-06	1.639e-05	0.512332	0.195858	9.03993e-06	0.139346	0.786756	6.18936e-06	0.796589	0.141425	6.51239e-06	0.245726
Ma10_t07250.1	Ma10_g07250	sp|Q8H383|ALFL2_ORYSJ PHD finger protein ALFIN-LIKE 2 OS=Oryza sativa subsp. japonica GN=Os07g0233300 PE=2 SV=1//4.82765e-79	mRNA	1.97482	2.53739	2.05517	2.58804	2.2504	3.72637	2.10533	1.69171	1.4835	2.03907	2.55791	2.96725	2.01425	1.95061	1.30526	2.09955	2.14207	1.76501	2.09653	3.55682	2.52053	2.24933	1.34062	1.87935
Ma07_t06010.1	Ma07_g06010	sp|Q9XI84|RBCMT_ARATH [Fructose-bisphosphate aldolase]-lysine N-methyltransferase, chloroplastic OS=Arabidopsis thaliana GN=LSMT-L PE=1 SV=1//7.0627e-11	mRNA	0.361246	1.11497	1.49662	1.55669	1.8681	1.90721	1.3485	0.152505	0.903683	1.55596	1.288	0.925938	0.275224	1.59638	0.848983	1.99026	2.35188	2.10427	1.66898	1.82045	1.08713	1.39166	1.30272	1.24419
Ma05_t09860.1	Ma05_g09860	sp|Q9LIR6|BAM1_ARATH Beta-amylase 1, chloroplastic OS=Arabidopsis thaliana GN=BAM1 PE=1 SV=1//0	mRNA	22.8121	13.0431	14.3098	6.82058	12.4019	5.79392	9.89212	46.1409	8.58796	15.6293	9.18029	6.14455	9.4545	11.5901	11.6916	8.62659	10.9136	10.5875	5.56081	7.07578	5.37238	5.71368	30.4099	5.95181
Ma00_t03660.1	Ma00_g03660	-//-	mRNA	0	0.390268	0	1.38428	0.203019	0	0.563337	0	0	0.583272	0.399907	0.918158	0.645998	0.382899	0.333861	0.249718	0.410911	0.397949	0.700311	0.878484	0.181536	0.161712	0.274667	0.364956
Ma06_t00440.1	Ma06_g00440	sp|Q7XBQ9|RGA2_SOLBU Disease resistance protein RGA2 OS=Solanum bulbocastanum GN=RGA2 PE=1 SV=1//1.16822e-30	mRNA	0.0420347	0.16126	0.038775	0.146053	0.112775	0.2498	0.180766	0.072527	0.213372	0.101471	0.0284441	0.175879	0.136408	0.0391966	0.0858723	0.11038	0.167607	0.268687	0.157481	0.17849	0.124656	0.219593	0.0205322	0.150199
Ma01_t08280.1	Ma01_g08280	sp|Q6ZJJ0|BGA11_ORYSJ Beta-galactosidase 11 OS=Oryza sativa subsp. japonica GN=Os08g0549200 PE=2 SV=1//0	mRNA	0	0	0.129049	0.121438	0.0603052	0.125992	0.138505	0	0.0910963	0.0618665	0	0.096274	0.0704948	0.0745648	0.0767131	0	0.0867215	0.0849242	0.223995	0.161638	0.196886	0.0346968	0	0.160696
Ma04_t00870.2	Ma04_g00870	sp|Q06197|IDHC_SOYBN Isocitrate dehydrogenase [NADP] OS=Glycine max GN=IDH1 PE=2 SV=2//0	mRNA	1.31415	4.87796	6.51803	9.89101	7.17881	12.8003	8.55934	2.65103	8.50898	6.21051	6.94625	15.1993	10.0365	5.05653	3.29918	2.54232	1.7357	5.81381	7.809	6.9177	15.7174	11.2991	2.42362	8.28207
Ma04_t00870.1	Ma04_g00870	sp|Q06197|IDHC_SOYBN Isocitrate dehydrogenase [NADP] OS=Glycine max GN=IDH1 PE=2 SV=2//0	mRNA	2.93243	3.5796	4.98044	8.1623	11.3119	13.7836	7.95151	1.84335	9.923	8.41055	4.9551	11.3596	5.20448	3.63812	5.9905	1.90957	3.84411	3.75742	9.09252	7.51777	9.58545	7.07753	0.000267086	7.56883
Ma01_t21020.1	Ma01_g21020	sp|A8MQA3|PP330_ARATH Pentatricopeptide repeat-containing protein At4g21065 OS=Arabidopsis thaliana GN=PCMP-H28 PE=2 SV=2//7.80607e-143	mRNA	1.83172	1.74595	1.98247	2.34697	2.2374	2.20867	2.37305	1.08731	1.93612	2.31659	2.94552	2.38259	1.6224	1.5333	1.53627	1.42152	1.72426	1.92908	2.35567	2.15735	2.58267	2.29837	0.774101	2.19135
Ma04_t32950.1	Ma04_g32950	sp|Q8RY89|PI5K8_ARATH Phosphatidylinositol 4-phosphate 5-kinase 8 OS=Arabidopsis thaliana GN=PIP5K8 PE=1 SV=1//8.93661e-15	mRNA	1.60134	1.59879	1.0821	1.28617	2.48394	1.44906	1.87409	2.05589	1.61001	1.61351	1.81529	1.64536	2.17701	1.49733	1.73829	4.25896	3.81677	1.98897	2.28036	2.63879	1.27687	1.8931	2.76628	2.18803
Ma01_t12520.1	Ma01_g12520	-//-	mRNA	6.0602	3.53448	4.00355	3.65899	3.86293	3.40566	4.11793	6.80383	5.09607	3.16333	3.76746	2.67924	6.14115	5.53152	6.46024	4.92503	5.85356	4.1609	3.4335	3.31758	3.42945	3.69161	7.15401	2.89051
Ma05_t10280.2	Ma05_g10280	sp|Q9XIN0|LHW_ARATH Transcription factor LHW OS=Arabidopsis thaliana GN=LHW PE=1 SV=1//5.37896e-72	mRNA	0.320571	0.583036	1.00063	1.28847	1.49034	2.41123	0.910193	0.0371425	0.342883	0.663116	0.0828649	1.54944	1.37955	2.93999	1.64691	1.2791	1.09939	3.51471	0.825576	0.879048	1.31306	0.713359	0.811828	0.873931
Ma08_t02850.1	Ma08_g02850	sp|Q6AST1|HOX32_ORYSJ Homeobox-leucine zipper protein HOX32 OS=Oryza sativa subsp. japonica GN=HOX32 PE=2 SV=1//0	mRNA	7.37347	7.19745	6.67771	11.0131	10.9022	10.6711	9.88805	8.77461	7.77742	7.77665	9.41183	8.96624	8.26912	9.10157	8.15695	13.7596	16.3809	14.0371	8.79793	10.7024	12.383	10.2529	11.9867	8.82435
Ma07_t19540.2	Ma07_g19540	sp|Q9C9H7|RLP12_ARATH Receptor-like protein 12 OS=Arabidopsis thaliana GN=RLP12 PE=2 SV=2//7.44838e-15	mRNA	1.06543	0.457154	0.556661	8.90054e-06	0.501194	0.315867	0.512842	0.276396	0.674165	0.499011	0.38499	0.655657	0.773701	0.42633	1.13961	0.326998	0.957956	0.447506	0.880374	3.8108e-05	0.446848	0.732963	0.734111	0.297136
Ma01_t11840.1	Ma01_g11840	-//-	mRNA	0.460295	0.693536	0.366875	0.878984	1.05472	0.645426	0.573174	0.311578	0.563491	0.59743	0.458416	1.37693	1.06934	0.944199	1.31757	0.687303	0.569171	0.595888	0.96893	0.857014	1.24803	1.398	0.343752	0.920579
Ma06_t37350.1	Ma06_g37350	-//-	mRNA	0	0	0	0	0	0	0	0	0	0	0	0	0	0	0	0	0	0	0	0	0	0	0	0
Ma11_t01710.1	Ma11_g01710	sp|Q8GYD9|SDE3_ARATH Probable RNA helicase SDE3 OS=Arabidopsis thaliana GN=SDE3 PE=1 SV=1//5.41471e-43	mRNA	4.21759	4.65113	2.63321	6.88767	5.40073	5.41273	5.78946	2.34932	6.15725	5.532	6.56616	5.72719	8.94524	4.65872	4.88692	7.89407	6.62582	8.28522	7.18303	8.31376	9.43151	8.91498	1.61456	5.8247
Ma04_t09990.6	Ma04_g09990	sp|Q3EDG5|TPST_ARATH Protein-tyrosine sulfotransferase OS=Arabidopsis thaliana GN=TPST PE=1 SV=3//5.44216e-176	mRNA	0.624072	0.774708	0.176137	0.467255	0.524905	0.25784	1.82748e-05	8.02991e-05	1.03174	0.000194214	9.75765e-05	0.815263	0.738886	7.1407e-05	0.629391	0.888434	0.565539	0.860372	0.000143829	0.704539	1.15582	0.839515	0.540818	0.000106746
Ma10_t16080.1	Ma10_g16080	sp|Q42592|APXS_ARATH L-ascorbate peroxidase S, chloroplastic/mitochondrial OS=Arabidopsis thaliana GN=APXS PE=1 SV=2//1.82085e-171	mRNA	54.0823	59.8622	59.0133	32.5492	32.0979	30.0546	59.0148	66.7472	63.4005	53.7409	53.9171	45.1431	34.0549	46.2648	50.7195	36.2948	37.2124	40.4749	27.1397	28.749	32.1538	29.8241	45.9863	43.5679
Ma08_t25470.1	Ma08_g25470	sp|P54121|AIG2_ARATH Protein AIG2 OS=Arabidopsis thaliana GN=AIG2 PE=2 SV=1//1.54968e-41	mRNA	8.88131	13.7016	11.7799	10.7343	12.4099	16.9255	10.2652	9.33598	10.9691	11.2358	13.5353	10.2322	11.3424	14.4082	14.4582	15.3445	12.5093	12.2862	8.99216	9.46419	8.74402	13.4504	14.991	11.1371
Ma05_t10280.1	Ma05_g10280	sp|Q9XIN0|LHW_ARATH Transcription factor LHW OS=Arabidopsis thaliana GN=LHW PE=1 SV=1//5.37896e-72	mRNA	0.0993847	6.30422e-05	0.810247	0.000238433	5.33633e-05	0.000903051	0.215845	2.46465e-11	4.13351e-05	4.60669e-06	1.56206e-11	0.185231	7.41861e-05	0.358048	0.0001194	0.307489	0.00180701	0.000898842	9.08115e-06	8.69448e-05	0.230272	6.01038e-05	4.37375e-05	0.000155476
Ma09_t12560.1	Ma09_g12560	sp|Q6ZAL2|TPP6_ORYSJ Probable trehalose-phosphate phosphatase 6 OS=Oryza sativa subsp. japonica GN=TPP6 PE=2 SV=1//2.44238e-141	mRNA	8.35986	5.73436	0.863857	0.998668	0.289617	0.152152	2.79927	1.97693	2.12145	2.69422	3.09564	0.379477	2.01321	0.336211	0.611774	1.64178	0.194098	0.645589	1.4692	1.73711	1.16035	0.465225	1.04518	1.09444
Ma02_t19770.1	Ma02_g19770	sp|P20024|MYB1_MAIZE Myb-related protein Zm1 OS=Zea mays PE=2 SV=1//6.96831e-81	mRNA	2.23344	0.230701	1.59023	1.35411	2.01441	1.82294	1.49632	6.31938	0.483632	4.26479	2.18745	1.45697	0.628698	0.898312	0.898906	0.364937	0.345102	0.464081	1.78062	1.70068	1.09334	0.930193	1.39348	0.429985
Ma04_t16230.1	Ma04_g16230	-//-	mRNA	2.39508	4.22517	5.57391	0	10.9018	3.12746	1.56222	6.10553	0	4.64242	3.90777	12.8929	4.60256	0	6.47211	2.01584	4.67431	5.68428	0	3.40542	1.24765	2.33718	4.38074	7.00901
Ma04_t15210.1	Ma04_g15210	sp|Q94C70|NAT2_ARATH Nucleobase-ascorbate transporter 2 OS=Arabidopsis thaliana GN=NAT2 PE=2 SV=2//0	mRNA	1.18138	2.38533	2.91602	3.04557	1.96357	3.00705	2.62003	1.16015	2.98056	3.83206	1.90796	4.04849	2.55709	1.64797	1.60782	1.45988	1.83827	1.3067	3.72839	2.68222	3.67986	2.84028	0.983653	3.38513
Ma09_t08110.1	Ma09_g08110	sp|P14675|ADH3_SOLTU Alcohol dehydrogenase 3 OS=Solanum tuberosum GN=ADH3 PE=2 SV=1//0	mRNA	5.24072	60.6562	24.888	58.0096	86.8208	35.3315	37.8562	1.61071	20.975	30.2546	85.2339	41.2234	21.1653	44.4197	36.2975	153.655	88.2644	120.96	31.7291	51.1586	51.4745	49.9328	12.901	40.0751
Ma01_t12530.1	Ma01_g12530	sp|Q9LK50|AB26G_ARATH ABC transporter G family member 26 OS=Arabidopsis thaliana GN=ABCG26 PE=3 SV=2//0	mRNA	0.101477	0.260365	0.292158	0.157054	0.318526	0.261686	0.156619	0.155772	0.137354	0.1399	0.0458562	0.130648	0.199176	0.337662	0.278136	0.236867	0.294182	0.312039	0.0844144	0.130559	0.0222534	0.0784469	0.231154	0.141487
Ma02_t11630.1	Ma02_g11630	-//-	mRNA	0.136196	0.0896534	0	0.321873	0.0937185	0	0.179846	0.157903	0	0.280366	0.280756	0.876893	0	0	0	0	0.0984623	0	0	0.21006	0.441952	0.547719	0	0.0836412
Ma05_t12200.1	Ma05_g12200	sp|Q24746|NEUR_DROVI Protein neuralized OS=Drosophila virilis GN=neur PE=3 SV=1//1.10679e-10	mRNA	7.86576	7.09739	7.99142	5.58857	6.26393	6.14159	7.01713	5.51115	6.30009	5.24039	6.10771	6.54071	6.90093	8.95163	8.79093	4.72001	3.34383	6.51961	7.03036	6.96721	5.93153	5.76791	5.61583	6.43812
Ma08_t25930.1	Ma08_g25930	sp|B7F9G7|ADPO1_ORYSJ Heptahelical transmembrane protein ADIPOR1 OS=Oryza sativa subsp. japonica GN=ADIPOR1 PE=2 SV=1//7.19821e-107	mRNA	3.34594	3.13473	11.2512	14.8098	26.0767	29.2496	14.1344	3.27827	13.9156	7.99196	6.88728	22.1878	12.7463	11.3129	11.1552	10.9896	4.67535	8.9774	39.8863	32.2666	13.9004	11.9899	2.82892	16.2095
Ma01_t01360.3	Ma01_g01360	-//-	mRNA	0.000273171	3.95416e-06	0.000305241	3.19436e-05	8.6886e-06	2.87822e-06	0.000337248	0.00063098	4.47319e-07	6.19981e-06	3.19028e-05	0.000324839	3.98809e-06	0.000318359	1.10369e-05	0.000505275	0	6.94396e-06	5.69453e-06	2.15603e-06	3.432e-05	0.0857894	0.000576829	1.60069e-06
Ma01_t01360.2	Ma01_g01360	-//-	mRNA	0.169462	0.367971	0.295426	0.554925	1.11219	0.533718	0.122949	0.234401	0.310122	0.700976	0.600978	0.480479	0.516954	0.512932	0.567718	0.177779	0.147504	0.769101	0.507205	0.785938	0.600819	0.185879	0.0655641	0.368458
Ma01_t01360.1	Ma01_g01360	-//-	mRNA	1.7388e-89	0.0960228	1.94414e-16	3.12766e-20	0.0701774	4.17515e-15	0.159575	3.52032e-96	2.24779e-08	4.9828e-14	1.86562e-24	9.79039e-26	4.34147e-12	1.17612e-53	1.93658e-18	1.71407e-14	0	6.54813e-21	7.6237e-11	2.00486e-09	0.129799	8.97982e-07	1.98043e-12	2.2474e-10
Ma10_t13580.1	Ma10_g13580	sp|Q39547|CUCM1_CUCME Cucumisin OS=Cucumis melo PE=1 SV=1//4.78204e-89	mRNA	13.5369	7.35003	3.19435	1.76655	3.1353	1.02597	15.2331	72.3319	6.08253	29.5742	4.23233	1.1332	4.79889	2.06862	2.56082	4.91592	5.39999	4.3865	2.50202	1.8755	0.931208	2.51577	10.5271	2.38549
Ma06_t27100.1	Ma06_g27100	-//-	mRNA	3.38336	3.31825	4.50277	3.93148	5.63638	4.12324	3.62795	6.04125	3.1297	3.58702	3.55828	2.93835	5.13465	3.42836	4.04533	5.78287	5.4837	3.91926	4.26161	4.54329	3.15835	3.34102	4.64993	3.04354
Ma02_t05720.1	Ma02_g05720	sp|A2XYW8|GUN13_ORYSI Endoglucanase 13 OS=Oryza sativa subsp. indica GN=GLU6 PE=3 SV=2//0	mRNA	0.0173347	0.0444859	0	0	0.233236	0.365888	0.0917271	0.439081	0.0175974	0.334563	0	0.267813	0.0408233	0.0432707	0	0.242774	0.0502521	0.0492004	1.1247	0.722595	0.0228058	0	0.50766	0.124327
Ma02_t07830.1	Ma02_g07830	sp|Q8LSN2|BBM2_BRANA AP2-like ethylene-responsive transcription factor BBM2 OS=Brassica napus GN=BBM2 PE=2 SV=1//1.22703e-135	mRNA	1.56646	0.149038	1.64848	1.21321	0.911518	1.33592	0.793024	0.579072	0.667479	0.453147	0.288574	0.746953	0.477904	1.23237	1.55409	0.372414	1.59763	1.07005	1.31874	0.895682	1.52575	0.627627	0.415239	1.27279
Ma10_t04080.1	Ma10_g04080	sp|A2ZF53|GATB_ORYSI Glutamyl-tRNA(Gln) amidotransferase subunit B, chloroplastic/mitochondrial OS=Oryza sativa subsp. indica GN=GATB PE=3 SV=1//9.95561e-96	mRNA	11.0137	10.3206	7.9415	10.1351	8.52468	10.7262	7.27012	6.56276	9.43814	5.00143	8.91255	8.14541	16.526	14.2989	16.6925	6.90539	8.4977	8.80264	6.39044	5.9676	5.4966	6.91823	9.96307	7.24561
Ma06_t18440.1	Ma06_g18440	sp|Q9LFR7|CXE17_ARATH Probable carboxylesterase 17 OS=Arabidopsis thaliana GN=CXE17 PE=2 SV=1//9.10236e-105	mRNA	77.6844	42.703	46.8131	43.3025	53.2991	19.7092	39.06	36.7944	20.1278	42.3549	76.5935	22.3615	19.1625	21.1943	19.1714	26.6775	35.7244	34.586	31.8499	39.0702	24.0347	22.7347	31.3326	16.845
Ma02_t02900.1	Ma02_g02900	-//-	mRNA	0	0.90462	0.145017	0.0677759	0.236564	0.252461	0.532337	0.266592	0.8763	0.47448	0.631144	0.370643	0.602427	0.514628	0.431298	0.40316	0.333125	0.0812533	0.476384	0	0.299729	0.463904	0.447626	1.68739
Ma07_t23830.1	Ma07_g23830	-//-	mRNA	0	0	0	0	0	0	0	0	0	0	0	0	0	0	0	0	0	0	0	0	0	0	0	0
Ma06_t10230.1	Ma06_g10230	-//-	mRNA	0.311305	0.809879	0.333842	0.781764	0.181679	0.513578	0.52897	0.513931	0.767291	0.917406	0.364392	1.20249	1.03841	0.281836	0.281832	0.311433	0.579381	0.440156	0.958432	0.754852	1.39408	0.667092	0.519424	1.02471
Ma04_t11950.1	Ma04_g11950	sp|P37392|TBB1_LUPAL Tubulin beta-1 chain OS=Lupinus albus GN=TUBB1 PE=3 SV=1//0	mRNA	1.79314	11.5585	9.54824	11.5182	7.93044	10.8153	13.7386	4.73621	14.6284	24.5592	7.53968	28.154	9.87346	3.61185	3.72654	2.90946	14.3235	5.83057	22.6509	20.5923	49.1932	17.5314	4.95003	25.0492
Ma06_t28420.1	Ma06_g28420	sp|Q9SL78|ATL12_ARATH Putative RING-H2 finger protein ATL12 OS=Arabidopsis thaliana GN=ATL12 PE=3 SV=1//1.44932e-77	mRNA	2.2788	6.24687	3.19339	8.03054	5.41508	5.99219	4.17962	1.49962	5.11257	4.40797	1.87025	4.3885	4.86772	4.47396	4.65521	5.79967	5.32881	2.41805	8.05808	7.89351	4.05419	3.37386	2.87826	4.76581
Ma08_t15640.1	Ma08_g15640	sp|Q39204|MYC2_ARATH Transcription factor MYC2 OS=Arabidopsis thaliana GN=MYC2 PE=1 SV=2//7.62957e-131	mRNA	35.093	32.0567	23.7672	42.9503	37.1017	24.8651	29.4847	28.381	21.0402	37.4593	39.0424	26.9889	26.2904	17.4791	17.8007	32.1866	38.0374	31.7369	37.6655	41.8165	29.9427	24.6313	18.0723	22.7183
Ma06_t17570.1	Ma06_g17570	sp|Q10KY3|CAMK1_ORYSJ Calcium/calmodulin-dependent serine/threonine-protein kinase 1 OS=Oryza sativa subsp. japonica GN=CAMK1 PE=1 SV=1//0	mRNA	7.25386	9.01214	9.02786	11.7126	11.5416	13.4132	8.4214	5.62632	8.46877	7.85882	8.04623	9.42923	7.88041	10.0292	9.30837	11.5518	10.5171	8.8066	10.1092	10.4778	10.0202	9.84508	6.92551	8.79864
Ma01_t16040.1	Ma01_g16040	sp|Q944K2|OST48_ARATH Dolichyl-diphosphooligosaccharide--protein glycosyltransferase 48 kDa subunit OS=Arabidopsis thaliana GN=OST48 PE=2 SV=1//1.18204e-15	mRNA	0	0	0	0	0	0	0	0	0	0	0	0	0	0	0	0	0	0	0	0	0	0	0	0
Ma06_t06490.1	Ma06_g06490	sp|Q9LIC2|TMN7_ARATH Transmembrane 9 superfamily member 7 OS=Arabidopsis thaliana GN=TMN7 PE=2 SV=1//1.18818e-14	mRNA	0	0	0	0	0	0	0	0	0	0	0	0	0	0	0	0	0	0	0	0	0	0	0	0
Ma11_t17940.1	Ma11_g17940	-//-	mRNA	0.983854	1.34224	1.05903	0.549495	0.676914	0.508876	1.04624	0.220261	0.248411	0.229894	0.36786	0.214407	0.438973	0.395841	1.01231	0.953685	0.37063	0.733325	0.356118	0.246132	0.370784	0.618299	0.19672	0.226491
Ma05_t01310.1	Ma05_g01310	-//-	mRNA	38.7977	56.9007	48.946	42.2253	50.4735	50.8997	31.0377	37.3219	29.7427	36.059	37.7524	45.1476	30.04	36.0685	35.1704	49.1793	39.3119	38.0201	48.1082	40.1227	28.0548	32.4439	41.4799	46.0863
Ma08_t14160.1	Ma08_g14160	-//-	mRNA	0.667297	2.62845	3.47613	3.89284	3.48524	3.9883	4.24344	0.366574	5.35404	8.9249	2.7246	9.32804	6.59259	2.3591	2.4524	1.94704	5.10887	1.93525	7.07044	6.08151	17.0741	6.83523	1.7963	8.76504
Ma03_t23510.1	Ma03_g23510	-//-	mRNA	0.308971	0.798318	1.49728	0.720764	0.752782	1.36498	0.980482	0.570227	1.00356	1.14865	0.336332	2.22772	0.760747	0.66061	0.354155	0.270455	1.34264	0.525195	1.12884	1.47835	2.95663	0.893442	0.60234	1.93436
Ma09_t05140.1	Ma09_g05140	-//-	mRNA	24.9663	63.0618	79.1711	78.28	90.7889	90.2009	50.1109	32.5456	35.5472	48.3578	39.7511	94.9112	39.0101	29.7481	24.9552	40.1165	29.6858	25.9537	107.726	95.2991	77.142	66.1459	47.971	54.2793
Ma03_t07260.1	Ma03_g07260	sp|Q6EP49|MAD27_ORYSJ MADS-box transcription factor 27 OS=Oryza sativa subsp. japonica GN=MADS27 PE=2 SV=2//2.93954e-115	mRNA	10.3139	11.4441	7.45795	7.07933	6.89843	4.49303	7.15122	17.6498	7.57679	6.25369	5.74912	3.99318	8.1895	8.55204	12.3135	7.89185	9.50476	11.0263	5.2069	5.06469	9.20558	5.79269	17.6365	4.91979
Ma11_t17940.2	Ma11_g17940	-//-	mRNA	8.52406	10.4109	7.46976	9.07481	9.10167	10.2764	5.3609	12.3231	6.93952	5.78998	8.27684	5.62364	6.62437	10.5366	8.87167	11.2409	12.1823	8.46493	6.4433	6.43887	5.61566	6.12054	13.3748	8.37728
Ma06_t06480.1	Ma06_g06480	sp|Q17QR8|HARB1_BOVIN Putative nuclease HARBI1 OS=Bos taurus GN=HARBI1 PE=2 SV=1//1.44621e-16	mRNA	0.420024	0.134985	0.0778979	0.0732354	0.169815	0.0889583	0.0555569	0.241917	0.149231	0.347309	0.171008	0.0270385	0.247003	0.78797	1.19196	0.0367657	0	0.0893656	0.0349214	0.291789	0.0828072	0.170342	0	0.10061
Ma09_t07980.1	Ma09_g07980	sp|Q2QWE9|SGS3_ORYSJ Protein SUPPRESSOR OF GENE SILENCING 3 homolog OS=Oryza sativa subsp. japonica GN=SGS3 PE=3 SV=1//0	mRNA	32.4894	30.8635	34.7864	39.1598	35.9871	48.7824	27.3608	14.7538	38.9632	28.8577	28.5294	37.8689	43.0701	45.8117	46.2279	39.529	30.9314	33.8452	42.6098	39.485	37.7276	38.7424	22.3982	37.832
Ma10_t09100.1	Ma10_g09100	sp|Q9SPG3|MYB26_ARATH Transcription factor MYB26 OS=Arabidopsis thaliana GN=MYB26 PE=2 SV=1//9.34926e-61	mRNA	0	1.00385	0.827585	0.356229	0.22542	0.236968	0.110265	0	0.8746	0.153125	0.151155	0.32207	0.978604	0.348957	0.259868	0.0486589	0.362399	0.157552	0.415591	0.34322	3.35476	2.02651	0	0.0334087
Ma02_t12940.1	Ma02_g12940	-//-	mRNA	0	0	0	0	0	0	0	0	0	0	0	0	0	0	0	0	0	0	0	0	0	0	0	0
Ma04_t01930.1	Ma04_g01930	sp|Q9FPS4|UBP23_ARATH Ubiquitin carboxyl-terminal hydrolase 23 OS=Arabidopsis thaliana GN=UBP23 PE=2 SV=2//4.94279e-09	mRNA	4.79729	4.06763	5.58864	6.90126	6.70272	7.64107	7.73693	4.11478	7.17863	7.61882	7.10845	7.20099	5.97198	7.19537	5.36853	4.68558	6.18667	5.25535	7.27746	6.18542	5.42751	6.30112	6.93924	5.49435
Ma07_t04700.1	Ma07_g04700	sp|Q39117|TGT2_ARATH Trihelix transcription factor GT-2 OS=Arabidopsis thaliana GN=GT-2 PE=2 SV=1//4.81031e-17	mRNA	4.13229	6.14942	4.37946	10.4561	7.81239	6.57489	6.37338	5.20448	5.72171	6.6267	7.33313	8.46801	7.61326	5.82734	5.36623	8.49682	10.5642	9.75739	10.6239	10.741	9.08397	7.69017	5.66016	8.38051
Ma05_t27620.1	Ma05_g27620	sp|O65731|RS5_CICAR 40S ribosomal protein S5 (Fragment) OS=Cicer arietinum GN=RPS5 PE=2 SV=1//3.63189e-25	mRNA	0	0	0	0	0	0	0	0	0	0	0	0	0	0	0	0	0	0	0	0	0	0	0	0
Ma06_t07340.1	Ma06_g07340	-//-	mRNA	0.705108	1.4628	1.48104	1.2457	2.17423	3.0957	0.931397	0.680364	0.834772	0.726351	0.88604	1.43756	2.18542	2.55303	2.3926	1.23448	0.849975	1.57546	2.81969	2.17542	1.14685	2.97559	0.456817	1.93879
Ma10_t26110.1	Ma10_g26110	sp|Q5Z5I4|GLK1_ORYSJ Probable transcription factor GLK1 OS=Oryza sativa subsp. japonica GN=GLK1 PE=2 SV=1//1.31033e-90	mRNA	0.00962701	0	0.0237798	0.0223649	0.0152995	0.10884	0.0166047	0	0.0114321	0.26705	0.015273	0.374165	0.0127829	0.096838	0.0399237	0.407015	0.01735	0	1.09552	0.717872	0.0166949	0.246999	0.0375748	0.0137514
Ma04_t04280.1	Ma04_g04280	sp|P0C073|RUB1_DESAN Ubiquitin-NEDD8-like protein RUB1 OS=Deschampsia antarctica GN=RUB1 PE=2 SV=2//3.31957e-11	mRNA	0	0	0	0	0	0	0	0	0	0	0	0	0	0	0	0	0	0	0	0	0	0	0	0
Ma06_t09010.2	Ma06_g09010	sp|Q56XQ6|PTR15_ARATH Protein NRT1/ PTR FAMILY 4.4 OS=Arabidopsis thaliana GN=NPF4.4 PE=2 SV=1//0	mRNA	0.247732	0.081793	0.341232	0.111732	0.71015	0.392896	0.588888	0.0713062	1.15894e-11	0.631265	1.1073	0.622462	0.179926	0.293414	0.352568	2.72609e-18	2.43741e-17	0.109598	0.118305	0.508719	0.070917	0.0788697	0.16787	6.55383e-15
Ma10_t26110.2	Ma10_g26110	sp|Q5Z5I4|GLK1_ORYSJ Probable transcription factor GLK1 OS=Oryza sativa subsp. japonica GN=GLK1 PE=2 SV=1//1.31033e-90	mRNA	0.00979045	0	0.0241978	0.0227521	0.141874	0.110169	0.086285	0	0.126795	1.6929e-06	0.169446	5.10033e-06	0.170346	3.97529e-07	3.26686e-07	9.94309e-06	0.123588	0	0.000101974	4.72129e-06	0.0855788	2.56452e-05	0.0382286	0.12591
Ma02_t18970.1	Ma02_g18970	-//-	mRNA	24.1102	24.2708	23.2718	20.7085	24.713	27.7656	18.0441	36.0816	20.0106	21.4034	19.1914	20.0176	23.6308	23.0518	23.2387	26.4015	25.3261	15.4049	22.849	21.0292	16.1195	18.9681	30.3107	22.4953
Ma09_t07990.1	Ma09_g07990	sp|Q56XQ6|PTR15_ARATH Protein NRT1/ PTR FAMILY 4.4 OS=Arabidopsis thaliana GN=NPF4.4 PE=2 SV=1//0	mRNA	73.019	20.5409	34.8049	19.7321	22.8454	15.7662	28.9541	75.2225	14.628	58.8212	66.7797	18.1132	10.7109	25.4419	26.2104	15.893	15.455	14.3826	22.3578	27.217	12.4377	8.19631	41.5692	9.07916
Ma07_t05880.1	Ma07_g05880	sp|A7NY33|PER4_VITVI Peroxidase 4 OS=Vitis vinifera GN=GSVIVT00023967001 PE=1 SV=1//1.50905e-111	mRNA	0	0	0	0	0	0	0	0	0	0	0	0	0	0	0	0	0	0.0960348	0	0	0	0	0	0
Ma09_t01520.1	Ma09_g01520	sp|Q8GYN5|RIN4_ARATH RPM1-interacting protein 4 OS=Arabidopsis thaliana GN=RIN4 PE=1 SV=1//1.7635e-09	mRNA	51.4979	15.8457	37.0446	7.85058	7.96298	8.60507	22.164	41.3944	33.3506	12.8519	11.1306	5.32814	43.2335	32.467	48.0518	9.35007	7.52959	7.26028	3.99188	3.76649	3.61211	14.6752	31.9096	14.2995
Ma06_t14210.1	Ma06_g14210	sp|Q9SY66|FRS11_ARATH Protein FAR1-RELATED SEQUENCE 11 OS=Arabidopsis thaliana GN=FRS11 PE=2 SV=1//0	mRNA	6.81667	7.66266	10.1466	9.8451	11.408	12.1433	8.05426	7.82072	8.00659	9.63993	7.81803	8.57843	7.98375	8.29023	6.73549	16.0571	16.5577	12.6026	12.5607	12.263	10.5034	6.99798	9.92107	9.39533
Ma06_t14210.2	Ma06_g14210	sp|Q9SY66|FRS11_ARATH Protein FAR1-RELATED SEQUENCE 11 OS=Arabidopsis thaliana GN=FRS11 PE=2 SV=1//0	mRNA	2.32555	2.77445	0.222269	2.04359	2.04127	2.77582	1.02525	3.99186	0.651979	1.64974	1.63187	1.51809	1.52356	1.88847	1.84417	4.64936	3.03356	3.45392	1.42808	2.12121	2.13816	2.4404	1.38239	2.47675
Ma06_t14210.3	Ma06_g14210	sp|Q9SY66|FRS11_ARATH Protein FAR1-RELATED SEQUENCE 11 OS=Arabidopsis thaliana GN=FRS11 PE=2 SV=1//0	mRNA	3.34175	0.878914	0.58295	2.44939	1.55457	1.8829	0.294574	0.768424	3.04397	2.83678e-05	1.2107	1.05007	4.94071	3.62856	2.79713	4.88808	3.47643	3.85256	3.26335	2.09315	0.885306	2.87134	3.83055	2.5617
Ma07_t24580.1	Ma07_g24580	sp|Q9XHZ8|Y1178_ARATH BTB/POZ domain-containing protein At1g21780 OS=Arabidopsis thaliana GN=At1g21780 PE=1 SV=1//6.32578e-160	mRNA	0.907932	1.25131	0.897838	1.11221	1.49961	1.79244	1.59656	1.18449	0.532341	1.11213	1.19502	1.14829	1.10925	0.886266	1.00609	1.15697	0.525446	2.16045	2.3102	0.638251	1.45379	1.14497	0.619955	1.94628
Ma07_t24580.2	Ma07_g24580	sp|Q9XHZ8|Y1178_ARATH BTB/POZ domain-containing protein At1g21780 OS=Arabidopsis thaliana GN=At1g21780 PE=1 SV=1//6.32578e-160	mRNA	11.4794	13.097	14.5078	11.5399	17.3078	15.2323	10.593	9.92903	11.9282	10.0054	10.5953	10.9103	10.0691	12.2004	11.8219	14.8864	12.7525	11.4912	12.8468	13.3557	10.8362	9.8542	10.1747	13.4392
Ma05_t31660.4	Ma05_g31660	sp|Q9M3G7|ATM_ARATH Serine/threonine-protein kinase ATM OS=Arabidopsis thaliana GN=ATM PE=2 SV=1//4.95883e-13	mRNA	4.62798	3.08636	2.88701	4.73674	4.17696	6.71332	2.64288	3.67833	4.08048	3.33392	3.47524	4.80121	4.82337	5.90674	4.27117	5.72451	8.38806	2.13601	5.50184	5.46067	3.58337	4.41546	4.2042	4.26355
Ma05_t31660.1	Ma05_g31660	sp|Q9M3G7|ATM_ARATH Serine/threonine-protein kinase ATM OS=Arabidopsis thaliana GN=ATM PE=2 SV=1//4.95883e-13	mRNA	0.476686	0.275318	0.41653	1.22689	0.688265	0.468291	0.215619	1.26222	0.918944	0.486024	0.323002	0.24691	0.20512	1.11505	0.156001	0.350049	0.385049	1.88888	0.910585	1.03357	0.518825	0.509778	0.727089	1.01218
Ma05_t31660.3	Ma05_g31660	sp|Q9M3G7|ATM_ARATH Serine/threonine-protein kinase ATM OS=Arabidopsis thaliana GN=ATM PE=2 SV=1//4.95883e-13	mRNA	5.11269	4.72307	5.47305	5.39128	5.58853	7.21611	3.8427	3.77863	3.4635	3.88788	4.94421	4.13059	6.52292	4.64203	4.06121	6.28213	4.85284	4.26475	4.40393	3.61524	5.20737	3.66165	4.98343	3.52892
Ma05_t31660.2	Ma05_g31660	sp|Q9M3G7|ATM_ARATH Serine/threonine-protein kinase ATM OS=Arabidopsis thaliana GN=ATM PE=2 SV=1//4.95883e-13	mRNA	14.1399	11.9889	10.4131	13.5816	15.3891	18.0877	9.63712	13.2698	12.2292	12.4428	11.1674	13.305	18.8123	15.5606	19.1874	20.7579	19.1946	13.8129	16.4121	16.4892	9.37239	12.8711	14.6324	12.8665
Ma05_t02080.2	Ma05_g02080	sp|Q8L746|NPR3_ARATH Regulatory protein NPR3 OS=Arabidopsis thaliana GN=NPR3 PE=1 SV=1//1.06669e-174	mRNA	11.6239	10.4712	6.92026	8.80168	6.73854	8.03513	7.36628	15.2371	8.07311	6.51854	8.16814	9.86457	10.3375	15.3729	15.5394	9.45165	6.23276	8.30701	9.77461	11.2473	8.38952	11.1634	26.2262	9.22811
Ma05_t02080.1	Ma05_g02080	sp|Q8L746|NPR3_ARATH Regulatory protein NPR3 OS=Arabidopsis thaliana GN=NPR3 PE=1 SV=1//1.06669e-174	mRNA	2.40794	1.22947	2.9416	1.15894	0.416054	0.575404	0.453685	1.97446	1.42746	1.84929	1.40354	1.71294	1.18549	2.96753	2.82832	1.45036	2.37799	0.604254	1.49399	1.10175	0.187626	1.12525	4.01036	1.66081
Ma07_t20180.3	Ma07_g20180	sp|Q7VRP3|RL11_BLOFL 50S ribosomal protein L11 OS=Blochmannia floridanus GN=rplK PE=3 SV=1//3.22916e-28	mRNA	4.4762	4.83381	1.39732	2.72988	3.86065	2.47915	5.44279	1.81871	4.50645	2.53348	3.71393	0.601205	1.96164	3.87039	3.7071	1.33206	3.16803	2.76964	4.32896	3.54535	2.79807	5.30362	3.93054	2.02349
Ma00_t00870.1	Ma00_g00870	sp|Q9C5X9|HAC1_ARATH Histone acetyltransferase HAC1 OS=Arabidopsis thaliana GN=HAC1 PE=1 SV=2//5.70384e-11	mRNA	0	0	0	0	0	0	0	0	0	0	0	0	0	0	0	0	0	0	0	0	0	0	0	0
Ma04_t14610.1	Ma04_g14610	sp|O64823|MCU2_ARATH Calcium uniporter protein 2, mitochondrial OS=Arabidopsis thaliana GN=At2g23790 PE=2 SV=1//5.26069e-79	mRNA	1.35263	5.93489	7.74138	11.2295	6.89939	8.7462	3.61852	0.145149	3.73569	2.33878	1.62674	5.38663	3.28191	3.52221	2.62375	11.4546	5.10313	2.62875	3.55205	4.32109	5.97818	3.78363	0.858489	10.3802
Ma01_t11190.1	Ma01_g11190	sp|Q94JZ8|PUX7_ARATH Plant UBX domain-containing protein 7 OS=Arabidopsis thaliana GN=PUX7 PE=1 SV=1//1.21422e-116	mRNA	1.02755	0.691289	0.780523	2.06477	1.9218	1.71841	1.4208	0.269098	2.27576	1.70539	1.01482	2.85637	2.36038	1.81327	2.94689	0.940323	1.04904	1.88751	2.09632	1.47807	3.43555	2.46142	0.227824	2.04433
Ma01_t06580.1	Ma01_g06580	sp|O22914|CP121_ARATH Calvin cycle protein CP12-1, chloroplastic OS=Arabidopsis thaliana GN=CP12-1 PE=1 SV=1//2.01202e-17	mRNA	62.579	79.0541	61.4238	68.7675	144.501	132.94	44.4773	66.2551	43.9677	59.9179	56.9389	75.2962	56.9247	41.45	46.6333	221.552	161.655	116.728	127.791	136.839	52.5877	43.3964	90.4144	106.507
Ma04_t12010.2	Ma04_g12010	sp|A1A4J7|SMG8_BOVIN Protein SMG8 OS=Bos taurus GN=SMG8 PE=2 SV=2//1.81784e-23	mRNA	8.99839e-06	0.120926	2.23876e-05	0.105154	1.32915e-05	0.10773	1.24373e-05	1.03873e-05	0.0839703	1.09845e-05	0.399559	1.6524e-05	2.47e-05	8.93694e-06	0.088062	1.99254e-05	1.24414e-05	1.17823e-05	3.72307e-05	0.194884	0.347617	1.01625e-05	1.3186e-05	0.0842176
Ma04_t12010.1	Ma04_g12010	sp|A1A4J7|SMG8_BOVIN Protein SMG8 OS=Bos taurus GN=SMG8 PE=2 SV=2//1.81784e-23	mRNA	5.89692	5.71374	5.26319	5.66587	5.61679	5.37922	6.61407	9.30204	7.39499	4.92885	4.765	5.33718	4.89634	7.56085	5.41921	5.76524	4.98922	5.25227	4.47878	3.79567	4.27175	5.34613	7.87522	3.82083
Ma09_t25800.1	Ma09_g25800	-//-	mRNA	0	0	0	0.856423	0	0	0	0	0	0	0	0	0	0	0	0	0	0	0	0	0.402628	1.09344	0	0
Ma03_t17980.1	Ma03_g17980	sp|Q9M3B4|RID3_ARATH Protein ROOT INITIATION DEFECTIVE 3 OS=Arabidopsis thaliana GN=RID3 PE=1 SV=1//4.47349e-46	mRNA	0.205126	0.05865	0.0564103	0.0530191	0.184438	0.0322347	0.0904346	0.525213	0.439582	0.219835	0.0928378	0.381472	0.187537	0.114136	0.23561	0.0399004	0.33027	0.0323204	0.18945	0.140736	0.269473	0.132004	0.177887	0.382521
Ma11_t06280.1	Ma11_g06280	sp|Q7XSK0|BGL18_ORYSJ Beta-glucosidase 18 OS=Oryza sativa subsp. japonica GN=BGLU18 PE=3 SV=2//0	mRNA	2.94053	7.95402	1.43442	12.859	8.38771	13.1104	3.61042	1.3786	9.08036	11.1172	4.91821	10.2466	10.3865	3.1431	3.15117	19.9439	19.5752	2.3238	6.91289	7.66603	7.04174	8.32938	3.81579	10.6938
Ma08_t16700.1	Ma08_g16700	sp|Q9XFK7|MFT_ARATH Protein MOTHER of FT and TF 1 OS=Arabidopsis thaliana GN=MFT PE=1 SV=1//8.39673e-74	mRNA	26.7574	6.81192	38.8385	10.3958	64.5385	58.0336	8.58727	20.1343	3.61598	12.0175	18.1012	18.7568	16.1848	26.902	24.0074	36.5576	17.3602	39.151	50.7693	39.0554	16.6596	13.8776	33.037	16.6124
Ma04_t29030.2	Ma04_g29030	sp|Q8GYX9|WDL1_ARATH Protein WVD2-like 1 OS=Arabidopsis thaliana GN=WDL1 PE=1 SV=1//2.04317e-38	mRNA	6.59695	4.06286	4.86526	4.38908	4.06352	4.74472	4.70526	4.9958	6.19063	5.6293	4.48304	4.45578	5.03243	4.73972	6.10272	4.61074	4.81251	2.25523	5.8253	4.68321	4.28989	6.01113	8.90496	5.85039
Ma03_t32180.1	Ma03_g32180	-//-	mRNA	1.15317	1.40609	1.92616	2.65355	1.60694	1.74065	1.96027	0.30412	2.00652	4.0822	1.16626	2.37558	1.93026	1.41054	0.722448	0.403766	2.386	1.16644	3.88381	3.50876	7.03607	2.05715	0.513737	4.12997
Ma04_t29030.1	Ma04_g29030	sp|Q8GYX9|WDL1_ARATH Protein WVD2-like 1 OS=Arabidopsis thaliana GN=WDL1 PE=1 SV=1//2.04317e-38	mRNA	9.83199	9.58371	9.14564	8.28587	6.45818	6.68312	10.1906	11.1524	11.4706	6.29646	10.3817	8.25821	12.5346	12.2345	12.8952	6.99809	6.73028	8.7007	4.1162	5.31986	8.77517	8.94428	7.05784	9.23431
Ma06_t11240.1	Ma06_g11240	sp|Q9LDU0|MTP7_ORYSJ Metal tolerance protein 7 OS=Oryza sativa subsp. japonica GN=MTP7 PE=2 SV=1//0	mRNA	1.01139	0.543653	2.19616	1.40769	1.86102	3.07474	1.44888	1.36053	1.62547	0.232157	0.534786	1.12131	1.81327	1.30528	1.72245	0.836119	1.1803	1.23414	2.75369	2.2116	1.36363	1.46303	1.86273	1.48606
Ma02_t09550.1	Ma02_g09550	sp|Q9SN39|PP320_ARATH Pentatricopeptide repeat-containing protein DOT4, chloroplastic OS=Arabidopsis thaliana GN=DOT4 PE=2 SV=1//4.30917e-41	mRNA	2.63875	2.65625	4.11203	3.31757	2.33403	2.33273	2.39643	1.54222	3.65819	2.98557	2.51126	2.20572	2.8036	2.33798	3.10515	2.17186	2.19756	3.04511	2.32527	2.58408	2.27841	2.51054	1.65278	2.94606
Ma00_t03780.1	Ma00_g03780	sp|Q9SL67|PRS4B_ARATH 26S proteasome regulatory subunit 4 homolog B OS=Arabidopsis thaliana GN=RPT2B PE=1 SV=1//1.4176e-16	mRNA	0	0.201036	0.193344	0.890765	0.418215	0.468658	0.965129	0.686944	0.743292	0.399637	0.205795	0.755156	0	0	0	0.256738	0.633566	0.204453	0.479744	0.903094	0.559332	0.332281	0.564528	0.752077
Ma05_t21140.1	Ma05_g21140	-//-	mRNA	2.73596	2.52364	2.24057	2.20866	3.17309	2.26909	2.14677	7.00455	1.9226	3.10506	1.59514	1.27743	1.19885	1.66301	1.47127	2.68438	3.83256	2.64077	3.14592	2.45951	2.16812	1.66949	3.22399	2.42419
Ma04_t25040.2	Ma04_g25040	sp|Q9LNW0|HS178_ARATH 17.8 kDa class I heat shock protein OS=Arabidopsis thaliana GN=HSP17.8 PE=2 SV=1//2.20918e-06	mRNA	1.48884e-05	0.000187769	1.42219	4.23717e-05	0.000142159	0.000196664	0.478096	7.41538e-05	5.80485e-05	0.000118106	0.955789	7.00749e-05	0.000289704	7.41706e-05	0.000271506	0.951461	0.000402361	4.9734e-05	0.00019363	0.000209096	2.6421e-05	0.000405845	2.14764e-05	0.511284
Ma04_t25040.1	Ma04_g25040	sp|Q9LNW0|HS178_ARATH 17.8 kDa class I heat shock protein OS=Arabidopsis thaliana GN=HSP17.8 PE=2 SV=1//2.20918e-06	mRNA	1.52242	1.6249	0.0062596	1.84297	1.42548	2.41608	1.73219	2.76853	1.96132	2.58026	0.00711729	1.96008	1.6826	1.47147	1.5227	0.849601	2.16261	1.36883	1.75054	1.71703	1.91974	1.89655	1.88383	3.19059
Ma05_t30720.3	Ma05_g30720	sp|Q53NK6|MYBA1_ORYSJ Myb-related protein MYBAS1 OS=Oryza sativa subsp. japonica GN=MYBAS1 PE=2 SV=1//2.49292e-62	mRNA	1.15745	0.000941451	0.0864619	1.72679	2.37226	1.73065	1.53471	6.2597e-06	0.336632	2.71665	1.54205	0.793793	0.752112	0.346555	0.731269	1.95443	0.314753	0.528123	3.25666	3.28136	1.30506	0.669516	0.213159	2.15565
Ma05_t30720.2	Ma05_g30720	sp|Q53NK6|MYBA1_ORYSJ Myb-related protein MYBAS1 OS=Oryza sativa subsp. japonica GN=MYBAS1 PE=2 SV=1//2.49292e-62	mRNA	0.47997	1.01061	1.02224	2.93051	1.8445	1.2892	0.662426	4.75168e-06	0.986681	0.64636	0.589379	1.5643	2.31331	0.672312	0.301896	5.17459	3.80373	2.89558	2.72845	5.3675	2.91002	1.93851	1.04393	5.79885
Ma05_t30720.1	Ma05_g30720	sp|Q53NK6|MYBA1_ORYSJ Myb-related protein MYBAS1 OS=Oryza sativa subsp. japonica GN=MYBAS1 PE=2 SV=1//2.49292e-62	mRNA	0.107058	0.375139	0.396971	1.6893	0.771339	0.205209	0.44406	0.504776	0.762604	0.518367	0.450171	0.94363	0.851008	0.469256	0.572306	1.41218	5.49803	2.20608	1.51546	3.32718	2.11277	2.13007	6.10428e-06	2.85307
Ma06_t29010.1	Ma06_g29010	sp|Q9FRL5|ZHD5_ARATH Zinc-finger homeodomain protein 5 OS=Arabidopsis thaliana GN=ZHD5 PE=1 SV=1//1.8437e-16	mRNA	8.63022	4.5483	6.01516	3.33353	14.7875	11.841	3.67406	7.42965	2.22697	5.78755	6.4784	4.33172	5.94911	4.29112	5.05834	7.49042	7.62557	8.90275	13.4721	13.4883	2.44107	2.19725	6.34096	7.02155
Ma02_t20010.1	Ma02_g20010	-//-	mRNA	0	0	0	0	0	0	0.62371	0.56304	0.240864	0	0	0.611357	0	0	0.306703	0	0	0.653986	0.384138	0	0	0	0	0
Ma09_t11480.1	Ma09_g11480	-//-	mRNA	5.7042	2.32117	1.9603	2.24456	4.56384	2.00963	2.76235	3.92445	3.31444	2.75485	4.22088	2.01836	3.55957	2.20643	2.71095	5.64119	4.47543	2.95556	2.599	4.77057	2.84438	2.36182	2.88223	3.00844
Ma07_t17590.1	Ma07_g17590	-//-	mRNA	16.5299	37.7348	22.5956	37.5755	51.3622	62.643	22.9896	11.5124	27.8036	35.4892	32.0224	52.7009	56.1066	29.7954	33.2177	81.9184	46.6288	57.9267	54.4847	60.228	42.7847	46.6584	28.2421	54.9554
Ma01_t01870.1	Ma01_g01870	-//-	mRNA	0	0	0.981749	0	0	0	0	0	0.142858	0	0	0	0.16305	0.27171	0.152675	0	0	0.0991864	0.232629	0	0	0	0.273304	0.0865729
Ma07_t17590.2	Ma07_g17590	-//-	mRNA	46.9321	107.796	56.6614	121.375	147.669	190.128	61.6168	49.5806	73.2713	119.782	92.9719	170.632	141.298	90.4774	88.6761	220.777	159.483	151.559	160.364	168.533	125.867	142.728	77.1316	169.058
Ma06_t21340.1	Ma06_g21340	sp|Q8RY16|PEX6_ARATH Peroxisome biogenesis protein 6 OS=Arabidopsis thaliana GN=PEX6 PE=1 SV=1//0	mRNA	15.4377	17.7899	14.7994	14.1582	13.9653	13.3693	13.6689	18.7597	14.4197	13.2681	15.7746	14.0322	12.7427	16.2335	15.9664	17.2358	15.3776	11.4513	12.0321	11.5377	9.86345	12.898	19.2016	14.7721
Ma04_t24470.1	Ma04_g24470	-//-	mRNA	7.18154	6.39154	5.74588	8.99775	8.14656	9.36458	5.63929	7.29986	6.7583	6.59576	7.31732	6.96675	7.0007	6.56379	6.92293	8.42528	7.91254	8.27206	7.83273	7.85244	7.66104	6.23665	8.12357	6.31466
Ma08_t13220.1	Ma08_g13220	-//-	mRNA	6.61088	5.056	6.89526	6.26492	5.12703	6.91444	6.05531	5.9629	4.58363	5.62532	5.68059	5.88853	6.26327	6.48765	4.55859	6.19732	6.39482	6.09024	6.01384	5.50189	6.90761	6.13278	4.5214	6.02874
Ma08_t28230.1	Ma08_g28230	sp|Q9SGP2|HSL1_ARATH Receptor-like protein kinase HSL1 OS=Arabidopsis thaliana GN=HSL1 PE=2 SV=1//0	mRNA	1.38561	1.32913	0.998721	0.840111	0.624507	0.363383	1.36075	1.22033	1.00007	0.940715	0.703274	0.459907	0.957964	0.848066	0.962276	1.55395	1.20856	0.553531	0.468625	0.65188	0.342397	0.666009	1.18439	0.876901
Ma03_t29690.2	Ma03_g29690	sp|A2XQX0|ARP9_ORYSI Actin-related protein 9 OS=Oryza sativa subsp. indica GN=ARP9 PE=3 SV=2//0	mRNA	1.12329	2.61665	1.98945	1.71609	2.59509	1.19402	2.31027	2.80412	0.921361	1.9296	1.81679	2.6969	0.556309	1.38179	1.07324	1.58922	1.32182	2.22983	0.372974	1.35619	1.96066	3.05121	3.22141	1.20863
Ma07_t15760.1	Ma07_g15760	-//-	mRNA	2.21545	2.69453	2.90802	6.24133	2.92489	3.61705	3.02848	1.91525	3.29291	3.30879	2.94996	3.8135	3.5368	2.42204	2.84285	2.3999	3.9041	3.51122	4.50314	4.2901	5.49869	4.60246	2.17586	3.60423
Ma04_t39790.1	Ma04_g39790	sp|Q9FKW0|RNG1A_ARATH Putative E3 ubiquitin-protein ligase RING1a OS=Arabidopsis thaliana GN=RING1A PE=1 SV=2//4.65644e-96	mRNA	3.61991	3.78362	4.56956	5.62161	4.19301	5.04389	3.92416	4.24461	3.36855	4.04331	3.63493	4.33683	3.9869	4.57925	3.61674	4.81154	4.71265	6.08892	5.79954	6.13214	6.61548	4.5669	6.64251	4.68626
Ma05_t09110.1	Ma05_g09110	-//-	mRNA	0.47366	2.06228	1.45462	1.2989	1.15086	0.76567	1.32115	0.243549	1.33523	1.51883	1.08041	3.185	3.24819	0.804221	1.84949	0.184279	0.609222	1.70959	1.13303	1.62392	3.15522	2.12233	0.614148	2.11542
Ma04_t24460.2	Ma04_g24460	sp|Q9FKE9|RHD32_ARATH Protein ROOT HAIR DEFECTIVE 3 homolog 2 OS=Arabidopsis thaliana GN=At5g45160 PE=2 SV=1//0	mRNA	1.31598	1.44177	1.16097	1.32371	2.18346	2.43461	0.999412	2.65686	1.72668	1.19857	1.20932	1.36692	1.37623	1.65609	1.85488	2.06465	2.3939	1.14049	0.66451	1.09242	0.981283	1.7145	3.10414	1.14499
Ma10_t28540.1	Ma10_g28540	sp|Q94DH3|PCL1_ORYSJ Transcription factor PCL1 OS=Oryza sativa subsp. japonica GN=PCL1 PE=2 SV=1//9.78434e-12	mRNA	7.84355	8.82453	11.4794	8.79784	13.1107	16.861	9.71364	10.0395	6.52383	10.5514	6.23881	8.37606	9.76431	7.89736	8.6255	13.3181	11.25	10.2623	20.88	15.7113	10.8455	9.77841	10.131	14.8074
Ma04_t24460.1	Ma04_g24460	sp|Q9FKE9|RHD32_ARATH Protein ROOT HAIR DEFECTIVE 3 homolog 2 OS=Arabidopsis thaliana GN=At5g45160 PE=2 SV=1//0	mRNA	5.10336e-06	0.159782	0.000678116	2.69385e-05	6.37468e-05	1.65811e-05	0.305481	1.61298e-05	1.71642e-05	5.12194e-06	0.128701	0.146894	6.45117e-05	0.566845	3.86762e-06	7.54267e-05	1.77628e-05	0.349851	0.377328	0.124897	7.99486e-06	1.70359e-05	8.61487e-05	0.283258
Ma05_t05610.1	Ma05_g05610	sp|Q84L30|RD23D_ARATH Ubiquitin receptor RAD23d OS=Arabidopsis thaliana GN=RAD23D PE=1 SV=2//5.15209e-146	mRNA	43.9626	29.9502	22.8588	16.5609	23.7609	23.8608	19.5811	42.9768	15.1806	26.4937	27.7812	28.5972	49.9247	32.7736	44.7127	27.0447	26.3116	32.9778	33.1545	29.5033	21.4079	27.1664	35.7092	32.4204
Ma04_t33190.1	Ma04_g33190	-//-	mRNA	1.64674	2.01072	2.57212	2.7295	2.88881	3.21708	1.63911	1.01095	1.71948	2.16238	2.18918	2.72584	2.60521	1.93603	2.12524	1.89443	2.11427	2.93852	2.74013	2.63931	2.86927	3.27417	0.735003	2.41626
Ma05_t28270.1	Ma05_g28270	sp|Q8W234|SEUSS_ARATH Transcriptional corepressor SEUSS OS=Arabidopsis thaliana GN=SEU PE=1 SV=1//1.39695e-121	mRNA	0.242426	0.241475	0.215662	0.359137	0.198994	0.264373	0.285107	0.154983	0.41018	0.16716	0.23714	0.0520182	0.301684	0.285139	0.386302	0.188621	0.214777	0.286846	0.291421	0.207948	0.354744	0.359419	0.184142	0.240997
Ma05_t25890.2	Ma05_g25890	sp|P31583|RHN1_NICPL Ras-related protein RHN1 OS=Nicotiana plumbaginifolia GN=RHN1 PE=2 SV=1//2.20947e-96	mRNA	5.35917	4.67131	3.39523	2.10202	2.53274	1.16652	3.06835	2.27802	3.69378	2.28163	3.90271	1.5603	4.01359	3.75099	4.2019	2.12162	1.19663	3.18834	0.913186	0.851205	2.0511	4.79685	4.17855	2.32093
Ma05_t25890.1	Ma05_g25890	sp|P31583|RHN1_NICPL Ras-related protein RHN1 OS=Nicotiana plumbaginifolia GN=RHN1 PE=2 SV=1//2.20947e-96	mRNA	2.15607	0.675461	2.93282	1.53907	0.339644	1.17173	1.96974	0.919646	1.52141	1.43921	1.09159	0.78796	2.15957	1.11121	2.23015	1.07124	0.802482	1.10237	1.37509	1.708	1.8365	1.75773	1.40813	0.779394
Ma04_t20860.1	Ma04_g20860	sp|Q9SZN7|HIP26_ARATH Heavy metal-associated isoprenylated plant protein 26 OS=Arabidopsis thaliana GN=HIPP26 PE=1 SV=1//2.50109e-12	mRNA	3.45662	8.75632	11.2933	14.926	10.0656	11.0001	8.73148	16.6977	7.01583	14.812	5.98008	12.2397	3.7906	5.4318	6.7543	3.64878	5.517	6.24753	16.4191	13.2543	16.3717	8.43657	2.96651	15.2166
Ma04_t00930.1	Ma04_g00930	sp|Q9LKU8|PP401_ARATH Pentatricopeptide repeat-containing protein At5g28460 OS=Arabidopsis thaliana GN=At5g28460 PE=2 SV=1//9.33161e-143	mRNA	3.43666	3.64143	4.13531	3.31457	2.53027	2.45349	3.18922	1.06298	2.42997	2.52212	3.89423	3.41197	2.51677	2.2617	2.16194	2.30477	2.80047	4.02796	2.67384	2.90369	3.10439	2.61696	1.20176	2.92227
Ma10_t30560.1	Ma10_g30560	-//-	mRNA	5.25798	5.51061	8.59749	7.16576	7.6146	8.25184	7.45186	4.05234	5.75891	6.32068	7.40158	6.84584	4.53523	5.8303	5.60272	6.12503	7.01874	7.03864	5.88446	5.27931	8.26439	5.68151	5.24718	5.98567
Ma03_t09560.2	Ma03_g09560	sp|Q84VY2|NET4B_ARATH Protein NETWORKED 4B OS=Arabidopsis thaliana GN=NET4B PE=2 SV=1//5.74109e-09	mRNA	7.55371	18.8052	11.2963	28.4963	13.0911	16.9393	10.9387	18.498	14.3545	26.7368	10.421	21.9117	13.0444	13.5941	11.7276	12.2813	32.0858	10.3137	20.1713	17.5503	43.5171	19.6523	16.8982	28.5353
Ma03_t09560.1	Ma03_g09560	sp|Q84VY2|NET4B_ARATH Protein NETWORKED 4B OS=Arabidopsis thaliana GN=NET4B PE=2 SV=1//5.74109e-09	mRNA	1.29257	0.494024	1.69166e-05	1.27903	1.87824	0.446672	0.523606	1.60005	0.354283	0.560794	0.514076	3.24469	0.59594	0.56872	0.479269	0.000260722	0.608857	0.000200264	0.62938	0.613765	2.68167	2.51554	1.89832	0.590828
Ma07_t26770.1	Ma07_g26770	sp|Q9CXW3|CYBP_MOUSE Calcyclin-binding protein OS=Mus musculus GN=Cacybp PE=1 SV=1//3.4523e-22	mRNA	57.8014	78.3581	95.1049	53.8041	44.4487	43.3336	102.811	51.5747	65.9487	60.1133	88.3899	63.8926	34.1021	44.4885	42.5174	43.5962	30.2567	51.907	47.1521	44.8048	55.3615	58.61	60.8522	55.8528
Ma11_t14970.1	Ma11_g14970	sp|Q6P2B1|TNPO3_MOUSE Transportin-3 OS=Mus musculus GN=Tnpo3 PE=1 SV=1//2.39871e-68	mRNA	21.0457	20.4278	20.5718	21.7725	19.672	21.226	22.6198	18.2721	20.8607	20.0224	23.7652	19.4711	22.7279	21.8935	20.6703	21.5687	24.1238	26.3319	19.2982	21.0005	20.4846	21.8982	20.779	18.5547
Ma10_t30880.1	Ma10_g30880	sp|Q9ZT00|RCA_MAIZE Ribulose bisphosphate carboxylase/oxygenase activase, chloroplastic OS=Zea mays GN=RCA1 PE=2 SV=3//4.87663e-106	mRNA	2.55414	2.23565	2.67249	3.40578	1.67373	2.03797	4.91931	1.65761	3.02058	2.8355	3.67191	3.22459	3.87434	2.73506	2.85103	2.82178	2.62289	3.19912	1.97826	3.10058	3.22334	2.78524	1.78987	2.76759
Ma09_t30650.1	Ma09_g30650	-//-	mRNA	5.43266	28.94	4.98785	5.65442	7.66711	9.44314	11.3896	5.76833	3.38102	7.58802	9.81752	11.1304	3.51641	4.26113	3.39821	5.62132	6.40998	5.52738	9.11803	8.75071	7.42424	6.32202	3.33635	5.00285
Ma07_t27200.1	Ma07_g27200	sp|Q9AT54|SCGT_TOBAC Scopoletin glucosyltransferase OS=Nicotiana tabacum GN=TOGT1 PE=1 SV=1//1.73836e-106	mRNA	0.36496	1.35686	0.474561	1.47273	1.47436	1.62457	1.42289	0.486665	1.94991	1.21789	1.5373	2.91816	2.12482	0.59998	0.633189	1.81586	2.44986	1.38987	3.38646	2.37236	2.92995	2.8721	0.637407	2.48223
Ma06_t06880.1	Ma06_g06880	sp|Q29PU4|CLE12_ARATH CLAVATA3/ESR (CLE)-related protein 12 OS=Arabidopsis thaliana GN=CLE12 PE=2 SV=1//3.22082e-07	mRNA	0.44179	0.314638	0	1.10245	0.977661	0.380956	1.16061	0	1.34389	0.299369	0.632795	0	0.978248	0.310523	0.280679	1.93535	0.317154	0.609734	0.716032	0	0.551461	0	0.422226	0.588906
Ma01_t12190.1	Ma01_g12190	sp|Q148L1|GP108_BOVIN Protein GPR108 OS=Bos taurus GN=GPR108 PE=2 SV=1//4.07183e-13	mRNA	0.963679	0.394881	0.607702	0.354872	0.660781	0	0	0.139507	0.672303	0.413576	0.082598	0.0775554	0.0699718	0.462206	0.517089	0	0.522714	0.254934	0.099646	1.39363	0.156681	0.207906	0	0.073663
Ma07_t02240.1	Ma07_g02240	-//-	mRNA	3.45132	3.49329	3.87029	4.22969	4.02988	4.20096	5.60203	2.9181	3.29497	3.66893	4.60721	4.83968	3.20191	3.22932	3.46518	4.36713	3.46428	4.40284	4.02745	4.11366	4.20697	3.04165	3.52946	3.91525
Ma02_t23610.3	Ma02_g23610	sp|Q93ZH2|NFYA3_ARATH Nuclear transcription factor Y subunit A-3 OS=Arabidopsis thaliana GN=NFYA3 PE=2 SV=2//4.11768e-30	mRNA	3.63038	2.2247	4.58711	2.3883	3.9676	6.52546	0.866331	2.69602e-17	2.59937	2.01353	3.44483	2.93179	8.98454	10.5833	9.98522	1.76994	1.73175	5.10983	4.72418	1.06346	2.86861	4.53142	1.27156	2.94739
Ma03_t27180.1	Ma03_g27180	sp|Q54Z24|PITH1_DICDI PITH domain-containing protein 1 OS=Dictyostelium discoideum GN=DDB_G0277951 PE=3 SV=1//1.8408e-37	mRNA	28.6441	25.6488	34.9126	33.1837	35.5524	44.1606	29.6084	28.757	24.651	29.9183	31.9065	32.7113	30.7982	37.4979	38.0501	27.8746	25.4548	33.6045	45.0278	38.6121	36.0598	34.4668	28.9114	37.0976
Ma11_t14960.1	Ma11_g14960	sp|Q6ZH92|SDH31_ORYSJ Succinate dehydrogenase subunit 3-1, mitochondrial OS=Oryza sativa subsp. japonica GN=SDH3-1 PE=1 SV=1//1.54441e-24	mRNA	22.7678	29.9774	38.842	25.1483	24.6975	28.0936	29.2395	22.4428	29.8681	26.9425	29.174	31.504	21.2449	25.8617	25.7858	24.7757	25.5602	26.4342	26.7328	26.9699	30.4104	27.2697	26.2703	30.5049
Ma07_t06640.1	Ma07_g06640	sp|Q9FXI5|IQD32_ARATH Protein IQ-DOMAIN 32 OS=Arabidopsis thaliana GN=IQD32 PE=1 SV=3//7.12358e-25	mRNA	8.79214	16.3768	13.1728	34.5035	28.8246	37.8998	15.9432	5.42413	17.6204	26.0293	18.2072	38.2392	47.0244	21.3918	21.4579	34.1727	20.7891	33.1592	46.9289	44.1911	47.1824	47.3644	9.56736	37.4291
Ma02_t09280.1	Ma02_g09280	sp|Q9ZVH4|CUL3A_ARATH Cullin-3A OS=Arabidopsis thaliana GN=CUL3A PE=1 SV=1//0	mRNA	3.31156	3.68483	2.81216	3.11726	2.98219	2.80902	3.47178	1.94188	3.31421	1.8953	3.61988	2.03118	1.87712	2.10352	2.96647	2.2697	2.37755	3.01549	1.76748	1.6882	2.34385	2.1922	1.67766	2.1267
Ma04_t27340.3	Ma04_g27340	sp|Q6R2K1|SRF5_ARATH Protein STRUBBELIG-RECEPTOR FAMILY 5 OS=Arabidopsis thaliana GN=SRF5 PE=2 SV=1//0	mRNA	0.163771	0.106552	0.000115375	7.24655e-05	0.0147575	6.36363e-05	0.154244	0.38908	0.177618	0.356368	7.19476e-05	0.000734173	2.8104e-06	0.168819	0.0953266	0.0291087	0.303035	0.420546	2.89966e-05	1.96682e-05	0.352882	0.000207968	0.00148464	0.362396
Ma04_t27340.1	Ma04_g27340	sp|Q6R2K1|SRF5_ARATH Protein STRUBBELIG-RECEPTOR FAMILY 5 OS=Arabidopsis thaliana GN=SRF5 PE=2 SV=1//0	mRNA	0.237972	0.279232	0.478103	0.51315	0.0969188	0.481662	0.500099	0.364449	0.295622	0.339254	0.508914	0.563958	0.499323	0.435054	0.522626	0.414157	0.344261	0.339714	0.181193	0.561008	0.296747	0.400438	4.79735e-39	0.188258
Ma09_t18680.1	Ma09_g18680	sp|Q39202|RLK1_ARATH G-type lectin S-receptor-like serine/threonine-protein kinase RLK1 OS=Arabidopsis thaliana GN=RLK1 PE=2 SV=2//4.94363e-114	mRNA	0	0.0491333	0	0.0443116	0	0.108733	0	0	0	0	0	0	0	0	0	0	0	0	0	0	0	0	0	0
Ma06_t06090.1	Ma06_g06090	sp|Q851R2|MEL1_ORYSJ Protein argonaute MEL1 OS=Oryza sativa subsp. japonica GN=MEL1 PE=2 SV=1//0	mRNA	12.9627	14.4321	26.7311	19.0502	15.0286	18.629	20.4925	9.94811	25.8262	10.275	14.3364	14.0247	25.0032	26.5585	29.4883	19.7225	13.2752	16.7967	12.1962	11.9327	12.7769	18.3397	14.8973	16.9906
Ma09_t00070.1	Ma09_g00070	-//-	mRNA	1.2201	1.10146	0.993452	2.96498	2.12192	3.11913	2.21472	2.2129	2.20378	2.61954	1.97777	2.28639	2.9708	3.0179	2.00324	1.53708	1.48162	1.79706	1.81014	2.48508	3.49884	2.47995	1.3465	1.22876
Ma09_t00070.2	Ma09_g00070	-//-	mRNA	1.44964	0.854585	1.60882	0.00327201	0.00179276	0.679414	0.00272825	0.041154	0.76281	0.793861	0.477384	0.908614	0.133472	0.000304695	0.976721	0.000108443	1.46666	0.398009	1.8791	0.363166	0.89024	0.643729	0.867888	1.25638
Ma02_t09290.1	Ma02_g09290	-//-	mRNA	0.700818	0.554153	0	0.41435	0.386139	0.103696	0.0925357	0.162546	0.213328	0.288482	0.481814	0.180489	0.568174	0.540885	0.531796	0.613495	0.810565	0.296238	0.347394	0.43234	0.36367	0.241489	0.272089	0.603192
Ma10_t11550.1	Ma10_g11550	sp|Q54I39|IST1L_DICDI IST1-like protein OS=Dictyostelium discoideum GN=DDB_G0289029 PE=3 SV=1//1.28345e-17	mRNA	4.64809	2.29373	3.61703	3.4489	3.66294	3.07564	4.39151	4.73259	1.66407	2.08761	2.56247	1.73651	2.78242	2.3613	1.47714	2.43388	2.22532	2.50187	4.4167	3.94019	3.13658	2.33236	2.75384	3.80188
Ma05_t18150.1	Ma05_g18150	sp|Q9SJ52|YLS9_ARATH Protein YLS9 OS=Arabidopsis thaliana GN=YLS9 PE=2 SV=1//2.3585e-12	mRNA	0	0	0	0	0	0	0	0	0	0	0	0	0	0	0	0	0	0	0	0	0.0622874	0	0.092879	0
Ma09_t24070.1	Ma09_g24070	sp|P25864|RK9_ARATH 50S ribosomal protein L9, chloroplastic OS=Arabidopsis thaliana GN=RPL9 PE=2 SV=1//1.46996e-64	mRNA	9.2422	13.0211	8.74328	9.95622	10.2862	11.8061	13.9581	8.61296	11.1982	9.78981	11.5993	11.5966	8.58083	9.57733	11.5858	9.24604	8.87237	12.8629	11.1747	12.3688	9.97039	10.1153	7.79999	15.462
Ma03_t00330.1	Ma03_g00330	sp|Q28G05|SYF2_XENTR Pre-mRNA-splicing factor syf2 OS=Xenopus tropicalis GN=syf2 PE=2 SV=1//4.09988e-22	mRNA	18.6254	19.9151	15.0742	13.113	17.3063	17.9557	16.8998	35.6109	15.7043	15.9542	15.2281	14.9833	15.7033	21.8404	21.9064	19.707	17.8055	15.2213	15.7667	13.9762	12.8798	14.7285	29.5902	16.5974
Ma05_t31370.1	Ma05_g31370	sp|O22285|PMTB_ARATH Probable methyltransferase PMT11 OS=Arabidopsis thaliana GN=At2g39750 PE=2 SV=1//0	mRNA	11.3427	9.50896	7.88799	9.18183	8.50314	9.78126	9.6443	6.20841	11.0264	8.70492	10.0737	10.0983	13.1615	11.1916	12.4541	10.005	6.95342	8.69303	8.75897	10.8498	9.44391	11.1117	7.63075	9.60602
Ma03_t32210.1	Ma03_g32210	sp|Q9FFY6|ELCL_ARATH Protein ELC-like OS=Arabidopsis thaliana GN=ELCL PE=1 SV=1//2.56483e-51	mRNA	2.13783	1.4355	1.19026	1.11601	1.19232	1.53382	1.91764	1.93946	1.6661	0.840487	0.728642	1.27798	1.69698	1.54281	1.76302	2.40602	2.21112	0.97241	1.39345	1.94417	0.399567	1.01428	2.00784	1.4765
Ma05_t22120.2	Ma05_g22120	sp|Q8L7W5|SMO11_ARATH Methylsterol monooxygenase 1-1 OS=Arabidopsis thaliana GN=SMO1-1 PE=1 SV=1//4.38548e-150	mRNA	7.5946	2.71704	3.11018	3.11373	3.29905	2.58926	3.1287	3.7347	1.77495	3.71948	3.76558	1.65538	3.11051	1.96556	2.79763	1.66566	4.35914	2.03269	3.20499	2.93737	2.9367	2.85245	3.05972	2.86826
Ma10_t08080.2	Ma10_g08080	sp|O80366|ARR9_ARATH Two-component response regulator ARR9 OS=Arabidopsis thaliana GN=ARR9 PE=1 SV=1//3.67229e-46	mRNA	0.172388	0.028981	0.0348223	0.40389	8.27184e-06	1.90123e-05	0.182098	0	0.424828	0.235487	0.098371	0.442258	1.76919e-07	0.438046	2.14894e-06	1.41053e-06	0.177627	1.13228e-06	0.034786	1.51269e-05	0.335418	3.023e-06	0.0366666	8.52198e-06
Ma01_t05870.1	Ma01_g05870	sp|Q8VYN6|PFKA5_ARATH ATP-dependent 6-phosphofructokinase 5, chloroplastic OS=Arabidopsis thaliana GN=PFK5 PE=1 SV=1//0	mRNA	39.5495	31.0655	34.4381	28.5569	30.1751	33.9839	27.5284	32.048	30.0705	28.3941	34.2823	25.335	35.8043	40.3202	42.6127	35.9975	31.2044	36.7671	27.9372	25.6565	26.9841	30.7002	33.0587	28.4324
Ma05_t22120.1	Ma05_g22120	sp|Q8L7W5|SMO11_ARATH Methylsterol monooxygenase 1-1 OS=Arabidopsis thaliana GN=SMO1-1 PE=1 SV=1//4.38548e-150	mRNA	0.4195	6.33422e-06	0.387077	2.32551e-05	2.6373e-05	1.72495e-05	9.05566e-06	2.33706e-05	2.59747e-05	1.08203e-05	0.247437	1.91093e-05	2.87379e-05	0.474902	0.184175	1.50185e-05	1.36607e-05	0.22255	1.76653e-05	1.10208e-05	8.79489e-06	0.238689	1.2654e-05	0.27504
Ma03_t14730.1	Ma03_g14730	-//-	mRNA	6.25558	4.61552	5.72629	4.30778	3.65006	3.48543	4.96647	5.53759	4.85342	4.65112	5.42884	5.77244	6.56202	5.14299	5.85169	2.51226	3.21164	4.08411	3.65872	2.19502	3.91817	4.14704	3.50752	3.46574
Ma03_t14730.2	Ma03_g14730	-//-	mRNA	0.270331	0.214897	5.79194e-06	0.157398	0.588371	0.174877	0.626053	0.924088	0.537908	0.749857	0.417622	0.600915	0.515667	0.846791	0.91318	4.62516e-06	0.371796	0.277171	0.172074	0.78037	0.168328	0.175675	1.25781	0.296329
Ma11_t15440.1	Ma11_g15440	sp|Q9SA82|BH052_ARATH Transcription factor bHLH52 OS=Arabidopsis thaliana GN=BHLH52 PE=2 SV=1//1.41698e-29	mRNA	0	0	0	0	0	0	0	0	0	0	0	0	0	0	0	0	0	0	0	0	0	0	0	0
Ma06_t04160.1	Ma06_g04160	sp|O81221|ACT_GOSHI Actin OS=Gossypium hirsutum PE=3 SV=1//0	mRNA	0.055887	0	0	0.130239	0.188869	0.039712	0.0369519	0.0644384	0.0850923	0.115458	0.0379927	0.107932	0.0655869	0.0350857	0	0	0.121446	0.0791964	0	0	0.0366588	0.0646768	0	0
Ma06_t14750.1	Ma06_g14750	sp|Q9FLE8|Y5986_ARATH Uncharacterized protein At5g39865 OS=Arabidopsis thaliana GN=At5g39865 PE=2 SV=1//4.95762e-28	mRNA	0.0271904	0.666175	0.843075	0.981893	0.734873	0.888132	0.898925	0.313477	0.883197	2.32198	0.591383	1.92543	1.08519	0.443633	0.338759	0.476014	1.26056	0.500955	2.34919	1.76277	4.81654	1.13296	0.318175	3.20187
Ma07_t17510.1	Ma07_g17510	sp|P25076|CY11_SOLTU Cytochrome c1-1, heme protein, mitochondrial OS=Solanum tuberosum GN=CYCL PE=2 SV=1//1.71006e-60	mRNA	0	0	0	0	0	0	0	0	0	0	0	0	0	0	0	0	0	0	0	0	0	0	0	0
Ma08_t06210.1	Ma08_g06210	sp|Q2QNK7|S40A2_ORYSJ Solute carrier family 40 member 2, chloroplastic OS=Oryza sativa subsp. japonica GN=Os12g0562100 PE=2 SV=1//0	mRNA	0.832143	0.676556	9.79785e-06	1.46877	1.08845	0.764416	0.999915	2.66277e-05	0.569288	1.31857	1.12327	0.355545	0.121096	0.142172	0.407115	0.853826	0.962811	0.372779	0.344753	0.331222	0.392661	0.467314	0.991291	0.342671
Ma11_t12540.1	Ma11_g12540	sp|Q0V7V2|P2C42_ARATH Probable protein phosphatase 2C 42 OS=Arabidopsis thaliana GN=At3g17090 PE=2 SV=1//6.88618e-176	mRNA	43.6183	33.445	33.7119	33.3114	36.8011	30.7157	31.3675	65.3378	28.5623	42.5196	39.706	28.45	29.0144	31.5982	30.7482	37.3383	41.3365	34.189	33.3303	34.1149	25.4156	24.766	51.7684	24.3929
Ma10_t29280.1	Ma10_g29280	-//-	mRNA	1.46694	3.14143	1.21497	1.24901	1.44697	2.25602	0.893152	5.04891	1.72645	1.37856	1.3537	1.16993	1.17865	2.05268	2.08685	2.09081	1.52447	0.700482	1.31814	0.761675	1.28242	0.979155	4.05719	1.45534
Ma06_t29350.1	Ma06_g29350	sp|Q9CQ48|NUDC2_MOUSE NudC domain-containing protein 2 OS=Mus musculus GN=Nudcd2 PE=1 SV=1//7.01704e-20	mRNA	85.7148	77.6491	62.7979	58.8637	65.2434	78.0382	55.0691	95.2187	73.1561	64.6204	63.2755	59.1751	77.4555	77.0672	80.1907	76.1551	77.398	55.5421	60.6135	63.8111	51.3184	69.3184	82.8264	86.4764
Ma06_t34440.1	Ma06_g34440	sp|Q9FLB1|PYL5_ARATH Abscisic acid receptor PYL5 OS=Arabidopsis thaliana GN=PYL5 PE=1 SV=1//2.4143e-49	mRNA	0.655891	1.3077	1.25778	0.717219	0.714289	0.252302	1.32917	3.43575	0.488157	0.661522	0.835817	0.67561	0.459553	0.166194	0.738391	1.37794	1.13936	0.803801	0.942444	1.41693	0.399863	0.555067	1.19175	0.477056
Ma03_t08420.1	Ma03_g08420	sp|Q9FJK3|AGL80_ARATH Agamous-like MADS-box protein AGL80 OS=Arabidopsis thaliana GN=AGL80 PE=1 SV=1//6.29603e-42	mRNA	0	0	0	0	0	0	0	0	0	0	0	0	0	0	0	0	0	0	0	0	0	0	0	0
Ma03_t30570.1	Ma03_g30570	sp|P82280|RAV2_ARATH AP2/ERF and B3 domain-containing transcription repressor RAV2 OS=Arabidopsis thaliana GN=RAV2 PE=2 SV=1//5.9735e-120	mRNA	0.451852	0.894728	0.673486	0.737653	0.32608	0.214489	0.318652	0.277944	0.580949	0.871086	0.614705	0.620551	0.317947	0.795263	0.407754	0.791045	1.00362	0.853495	1.60099	1.62733	0.82941	0.766647	0.293653	0.543792
Ma04_t09990.3	Ma04_g09990	sp|Q3EDG5|TPST_ARATH Protein-tyrosine sulfotransferase OS=Arabidopsis thaliana GN=TPST PE=1 SV=3//5.44216e-176	mRNA	12.1927	16.888	16.1744	16.3872	16.9388	19.2385	13.3917	16.1198	11.4105	13.1753	12.5001	12.3406	19.0342	18.729	21.3205	22.7946	21.057	16.8994	15.4831	11.7186	13.0002	15.9828	15.0858	17.8397
Ma01_t18680.1	Ma01_g18680	sp|Q2MHE4|HT1_ARATH Serine/threonine-protein kinase HT1 OS=Arabidopsis thaliana GN=HT1 PE=1 SV=1//1.04267e-91	mRNA	46.0159	33.88	34.7187	38.0448	39.3983	38.2204	30.5828	38.7902	34.0259	34.4025	32.5142	28.1396	52.3921	43.2548	50.4315	45.285	41.6368	37.1513	37.7761	42.0572	32.1157	36.8965	36.3954	34.7395
Ma05_t13530.1	Ma05_g13530	sp|O04887|PME2_CITSI Pectinesterase 2 OS=Citrus sinensis GN=PECS-2.1 PE=2 SV=1//1.63045e-176	mRNA	0.171581	0.137885	0.159143	0	0.0578196	0	0.0283685	0.19766	0	0.0295565	0.116442	0.0552267	0.0504436	0.0268308	0.0442846	0.0375473	0.0621627	0.0912598	0.0356617	0.0993298	0.0281858	0.0993993	0.0418552	0.0256933
Ma06_t02820.1	Ma06_g02820	sp|P23922|HBP1A_WHEAT Transcription factor HBP-1a OS=Triticum aestivum PE=2 SV=1//1.28208e-59	mRNA	5.36202	3.30427	2.55397	5.04616	3.97115	5.27536	2.47221	7.98558	4.37808	3.19178	2.58651	3.51454	4.19277	4.64482	4.37752	3.99738	4.25113	4.01468	4.19228	3.195	3.26291	4.37636	3.84461	4.45561
Ma06_t02820.2	Ma06_g02820	sp|P23922|HBP1A_WHEAT Transcription factor HBP-1a OS=Triticum aestivum PE=2 SV=1//1.28208e-59	mRNA	3.39119	0.969151	3.41166	4.50618	1.95551	2.76059	1.0298	4.03626	3.90612	3.29821	2.70384	1.4965	2.60767	2.85213	2.27238	3.59409	3.58349	1.77491	1.96673	4.75742	3.53479	3.03043	1.46611	4.01253
Ma06_t02820.3	Ma06_g02820	sp|P23922|HBP1A_WHEAT Transcription factor HBP-1a OS=Triticum aestivum PE=2 SV=1//1.28208e-59	mRNA	1.18178	3.7554e-05	0.736579	9.69246e-05	0.371727	0.864614	1.04472	4.88376e-05	0.383828	5.60707e-05	0.704379	0.476617	0.725006	0.969656	1.66282	1.08545	8.73854e-05	0.725751	0.865867	3.35744e-05	3.69258e-05	0.932013	0.000141012	1.09616
Ma06_t02820.4	Ma06_g02820	sp|P23922|HBP1A_WHEAT Transcription factor HBP-1a OS=Triticum aestivum PE=2 SV=1//1.28208e-59	mRNA	1.86206	7.45203	1.84896	3.07425	4.9702	4.79784	3.08492	1.84107	2.82684	3.23751	2.65539	4.7238	4.95699	4.53109	5.01681	3.97118	4.30117	3.17825	5.51558	2.99644	3.13416	3.77631	5.67505	2.56091
Ma01_t16210.1	Ma01_g16210	sp|Q6ICW6|WNK11_ARATH Probable serine/threonine-protein kinase WNK11 OS=Arabidopsis thaliana GN=WNK11 PE=2 SV=1//4.26639e-167	mRNA	10.2898	9.17554	7.96579	6.20946	8.89567	4.3136	9.51826	12.6611	9.52477	13.4758	11.0507	5.42279	9.48294	8.89678	9.48806	6.44021	5.79321	11.4103	4.96095	5.55502	5.10761	6.48	4.78332	6.27643
Ma03_t03360.1	Ma03_g03360	sp|Q5JMK6|BZP06_ORYSJ Basic leucine zipper 6 OS=Oryza sativa subsp. japonica GN=BZIP06 PE=2 SV=1//8.35056e-69	mRNA	0.213528	0.671891	0.440614	0.717713	0.384145	0.167922	0.156893	0	0.553918	0.947971	0.257772	0.549829	0.334563	0.267465	0.270034	0.124605	0.309405	0.13456	0.394372	0.292996	1.37105	0.137388	0.0925773	1.10979
Ma04_t11010.2	Ma04_g11010	sp|P30235|PSUK_ECOLI Pseudouridine kinase OS=Escherichia coli (strain K12) GN=psuK PE=1 SV=2//3.17722e-16	mRNA	0.210231	2.33574	0.000272365	1.45165	0.318905	0.665711	0.953031	0.660692	1.07191	0.541691	0.321242	1.2061	0.325437	0.944419	0.358414	0.224303	1.13912	1.28634	1.37328	0.536615	2.61057e-05	0.688955	1.5604e-05	0.544732
Ma04_t11010.1	Ma04_g11010	sp|P30235|PSUK_ECOLI Pseudouridine kinase OS=Escherichia coli (strain K12) GN=psuK PE=1 SV=2//3.17722e-16	mRNA	11.5266	14.7561	18.9626	12.2801	14.5486	14.5683	16.2377	12.6529	16.2409	10.9391	16.8771	13.9158	10.2402	15.8862	17.4323	16.1114	11.4689	16.8151	6.86733	10.304	11.8494	13.9523	19.4811	13.425
Ma03_t31040.1	Ma03_g31040	sp|Q41916|CYT5_ARATH Cysteine proteinase inhibitor 5 OS=Arabidopsis thaliana GN=CYS5 PE=2 SV=2//2.41625e-31	mRNA	55.6409	48.9336	53.0333	28.6595	75.8507	66.7922	80.9124	22.7145	50.8892	56.0803	41.4778	71.1637	41.4267	33.097	37.067	48.6599	31.6475	44.4488	50.4404	65.0192	54.7773	56.9098	31.3315	84.3746
Ma05_t02640.1	Ma05_g02640	sp|P80728|MAVI_CUCPE Mavicyanin OS=Cucurbita pepo PE=1 SV=1//3.5496e-19	mRNA	0	0	0	0.0856222	0	0	0	0	0	0	0	0	0	0	0	0	0	0	0	0.11158	0	0	0	0.0890706
Ma02_t17920.1	Ma02_g17920	sp|Q8GYH8|SUT42_ARATH Probable sulfate transporter 4.2 OS=Arabidopsis thaliana GN=SULTR4;2 PE=2 SV=2//0	mRNA	23.5085	22.0329	18.8525	11.2223	20.8856	14.9511	22.5609	38.1919	15.4431	28.8679	26.6277	23.9165	15.6922	17.181	17.7934	12.4848	10.4844	43.1935	15.6257	14.1412	10.1093	15.0622	25.694	11.5661
Ma06_t29550.1	Ma06_g29550	sp|Q9SRT3|CSLC6_ARATH Probable xyloglucan glycosyltransferase 6 OS=Arabidopsis thaliana GN=CSLC6 PE=1 SV=1//0	mRNA	3.19248	3.67936	2.6705	5.10441	3.66252	4.06527	4.24148	5.32675	4.59138	3.43042	3.58514	6.19945	4.10898	3.5448	2.68396	2.81771	2.66127	2.92758	3.05546	3.2656	6.06165	5.32495	3.87132	4.25233
Ma10_t17120.1	Ma10_g17120	sp|Q32KY6|DCTP1_BOVIN dCTP pyrophosphatase 1 OS=Bos taurus GN=DCTPP1 PE=2 SV=1//2.41184e-24	mRNA	0.477833	1.27254	1.0756	2.99463	1.6162	1.53067	1.5006	3.92653	1.36411	2.22074	0.934383	1.03818	0.560428	0.788313	0.901557	1.51621	3.41763	0.719262	1.98411	1.75165	1.13561	1.24379	0.93164	2.47961
Ma02_t20200.10	Ma02_g20200	sp|E1BB03|ZRAB3_BOVIN DNA annealing helicase and endonuclease ZRANB3 OS=Bos taurus GN=ZRANB3 PE=3 SV=3//3.72726e-107	mRNA	0.132286	0.819578	0.521122	0.710504	1.50673	0.481118	1.24435	8.50351e-15	0.551438	0.628315	1.29625	0.374358	0.401048	0.33819	0.388173	0.478681	0.631521	0.537411	0.127726	0.847985	1.77013	0.739014	1.02789	1.36577
Ma02_t22020.1	Ma02_g22020	sp|Q9C519|WRKY6_ARATH WRKY transcription factor 6 OS=Arabidopsis thaliana GN=WRKY6 PE=1 SV=1//2.11467e-91	mRNA	27.5848	13.0221	13.6819	4.70886	9.63086	3.06104	12.3359	38.214	12.6206	18.2866	9.71075	2.63197	6.22013	11.2871	11.7342	7.25448	10.1727	3.03986	3.60946	4.69201	1.90994	3.46166	23.8223	5.38928
Ma05_t18390.1	Ma05_g18390	sp|Q9C8W3|FUT13_ARATH Alpha-(1,4)-fucosyltransferase OS=Arabidopsis thaliana GN=FUT13 PE=2 SV=2//9.38275e-176	mRNA	19.6122	20.202	21.1881	15.3175	17.9095	16.4657	17.8117	16.4036	15.4038	18.6613	20.8017	16.4282	14.5199	16.401	15.0872	17.0063	16.0142	21.5094	16.2293	18.0345	15.4031	19.2388	15.8749	17.0904
Ma10_t10610.1	Ma10_g10610	sp|Q8RZV7|MSP1_ORYSJ Leucine-rich repeat receptor protein kinase MSP1 OS=Oryza sativa subsp. japonica GN=MSP1 PE=1 SV=1//9.40512e-76	mRNA	12.2215	12.8755	14.837	7.38796	9.30857	7.60366	11.1442	25.8019	7.9718	10.261	7.19713	5.16308	7.29279	7.44567	6.07668	15.6707	11.4832	9.9842	8.729	11.0912	4.92182	7.60228	19.7459	8.73279
Ma11_t04170.1	Ma11_g04170	sp|O49743|GATA4_ARATH GATA transcription factor 4 OS=Arabidopsis thaliana GN=GATA4 PE=2 SV=1//2.66414e-40	mRNA	3.22155	0.395312	1.52087	1.51812	0.966733	1.01514	1.0144	0.766232	4.87921	2.4655	0.90326	3.35769	3.48324	0.897672	0.954105	0.0895212	2.07451	2.31958	1.06224	1.65763	11.378	1.59849	3.98987	1.10506
Ma07_t04150.1	Ma07_g04150	-//-	mRNA	3.78324	5.86092	4.82768	7.28103	7.30915	9.38516	4.63305	4.46703	4.10111	4.73005	5.93036	5.77288	4.858	5.82	4.78265	8.01319	8.89988	7.88119	6.32778	6.09253	4.93861	5.97773	4.60204	6.55305
Ma05_t23630.1	Ma05_g23630	sp|P19515|LIP_RHIMI Lipase OS=Rhizomucor miehei PE=1 SV=2//6.35689e-08	mRNA	4.50621	2.37302	3.62762	1.30912	2.10993	1.37575	3.52536	18.1956	2.66753	4.96182	2.24438	1.37528	1.8391	2.64364	2.33678	2.17099	2.1718	1.63906	1.12421	1.28918	0.436743	1.25397	7.4595	1.40526
Ma06_t11620.1	Ma06_g11620	sp|O48724|WEB1_ARATH Protein WEAK CHLOROPLAST MOVEMENT UNDER BLUE LIGHT 1 OS=Arabidopsis thaliana GN=WEB1 PE=1 SV=1//4.82512e-168	mRNA	7.68844	10.1682	8.94263	12.979	16.3217	16.3081	7.64437	9.81942	11.3333	8.09539	8.27752	14.2058	13.305	12.5997	11.9463	18.5177	14.7482	10.5755	12.8966	11.1687	10.2861	11.1263	12.2651	13.0859
Ma03_t24420.1	Ma03_g24420	sp|Q6YYC0|C3H55_ORYSJ Zinc finger CCCH domain-containing protein 55 OS=Oryza sativa subsp. japonica GN=Os08g0135800 PE=2 SV=1//5.45121e-78	mRNA	16.0837	11.787	18.4484	14.2507	18.1021	18.9747	11.0808	18.6801	11.0019	18.0294	13.0946	15.2442	18.8669	20.8685	21.0594	13.6905	24.0494	11.5075	17.3917	19.572	14.3294	12.151	12.7205	14.0537
Ma03_t28600.1	Ma03_g28600	sp|O22287|GMPP1_ARATH Mannose-1-phosphate guanylyltransferase 1 OS=Arabidopsis thaliana GN=CYT1 PE=1 SV=1//7.72487e-61	mRNA	0.889466	0.834484	1.04344	1.04935	2.18142	3.36274	1.09081	0.147226	1.41831	1.91898	0.784848	1.55439	1.25347	1.38405	1.50505	1.55726	1.83765	1.79197	2.31146	2.54795	2.14668	0.949779	0.863939	2.56878
Ma05_t09490.1	Ma05_g09490	sp|Q39103|G3OX1_ARATH Gibberellin 3-beta-dioxygenase 1 OS=Arabidopsis thaliana GN=GA3OX1 PE=1 SV=2//5.89682e-116	mRNA	0.191239	0.453168	0.633987	1.26444	0.345288	0.0909286	0.252855	0	0.129407	0.92154	0.260285	1.60046	0.784538	0.240655	0.26596	0.223199	0.230832	0.632	1.42898	1.86938	2.2556	0.810925	0	0.422337
Ma08_t27490.1	Ma08_g27490	sp|Q9LR47|IP5P6_ARATH Type IV inositol polyphosphate 5-phosphatase 6 OS=Arabidopsis thaliana GN=IP5P6 PE=1 SV=2//0	mRNA	0.0209029	0.134347	0.129216	0.0728903	0.0281688	0.118045	0.138243	0	0.127314	0.0288073	0.0567344	0.161472	0.0737564	0.104565	0.0647054	0.0731874	0.181757	0.118598	0.139034	0	0.27474	0.21799	0.0815893	0.200269
Ma10_t12000.1	Ma10_g12000	sp|Q7XRV0|RMI1_ORYSJ RecQ-mediated genome instability protein 1 OS=Oryza sativa subsp. japonica GN=RMI1 PE=3 SV=2//1.73193e-45	mRNA	1.20938	0.875279	1.01993	0.868616	0.970996	1.16083	0.765269	8.1682	0.920816	0.688898	0.783332	0.981592	0.743967	0.851142	0.928862	0.82846	1.41027	0.765296	0.72207	0.710386	0.848375	0.930458	3.18391	0.736908
Ma06_t07820.1	Ma06_g07820	sp|O48723|PLP2_ARATH Patatin-like protein 2 OS=Arabidopsis thaliana GN=PLP2 PE=1 SV=1//3.03056e-20	mRNA	0	0	0	0	0	0	0	0	0	0	0	0	0	0.16049	0.138497	0	0	0	0	0	0.155002	0.137829	0	0
Ma06_t15410.1	Ma06_g15410	sp|Q7SXW4|EMC3_DANRE ER membrane protein complex subunit 3 OS=Danio rerio GN=emc3 PE=2 SV=1//1.07182e-63	mRNA	35.3341	37.8739	44.5769	26.8986	27.3427	24.7522	41.3821	34.2096	33.6019	34.5637	43.7994	28.5533	28.491	36.1686	34.0583	22.2916	21.3082	30.343	22.9533	22.8173	28.5727	31.3534	28.5325	30.3919
Ma05_t19820.1	Ma05_g19820	sp|Q9LXE8|PP386_ARATH Pentatricopeptide repeat-containing protein At5g15340, mitochondrial OS=Arabidopsis thaliana GN=PCMP-H91 PE=2 SV=1//4.60944e-180	mRNA	0.936872	0.777244	0.698803	0.703662	0.620266	0.462418	1.36176	1.1236	1.08506	0.873487	0.714834	0.679531	0.653433	1.34732	0.824326	0.554404	0.707813	0.730723	0.461241	0.387102	0.643034	0.658382	0.721674	0.645292
Ma08_t10130.1	Ma08_g10130	-//-	mRNA	0.253105	0.1662	0.239788	0.447863	0	0.55805	0.584989	0.146625	0.642079	0.521251	0.347386	1.1407	0.587528	0.162146	0.136233	0.221565	0	0.267717	1.04645	0.683215	1.39802	0.654908	0	1.08523
Ma08_t26710.1	Ma08_g26710	sp|P27061|PPA1_SOLLC Acid phosphatase 1 OS=Solanum lycopersicum GN=APS1 PE=2 SV=1//1.43349e-74	mRNA	8.13798	16.9874	15.0422	12.3951	17.6738	12.2524	19.3174	16.2113	12.6842	14.1076	15.7504	12.5632	6.16193	9.98204	8.22027	13.0842	12.443	14.1538	11.2239	11.3407	14.1654	11.3124	16.0892	12.6688
Ma07_t11140.1	Ma07_g11140	-//-	mRNA	0.910504	0.871665	0.806135	1.06021	0.632451	0.70117	1.0321	3.89831	1.10907	1.46924	0.813091	0.870831	0.702607	0.978838	0.620487	0.637594	1.31918	0.921856	0.778129	0.562188	0.990224	0.843258	2.38488	0.812228
Ma04_t22660.4	Ma04_g22660	sp|Q0PGJ6|AKRC9_ARATH Aldo-keto reductase family 4 member C9 OS=Arabidopsis thaliana GN=AKR4C9 PE=1 SV=1//6.55043e-77	mRNA	1.67579	1.49273	1.01263	2.47768	1.53813	2.57036	3.03192	4.55122	2.25484	2.80813	2.04296	5.40179	0.94612	1.79568	0.491081	1.6265	1.57638	2.04676	2.67932	1.53346	2.26776	1.69386	1.46754	1.49937
Ma04_t22660.5	Ma04_g22660	sp|Q0PGJ6|AKRC9_ARATH Aldo-keto reductase family 4 member C9 OS=Arabidopsis thaliana GN=AKR4C9 PE=1 SV=1//6.55043e-77	mRNA	43.6258	37.7691	39.0397	31.2086	36.0668	36.1895	31.8415	73.8357	37.1329	27.7747	36.8772	24.1113	34.8521	40.5355	39.8172	55.1211	41.1328	41.0326	27.4444	29.9595	27.5604	27.4551	62.9103	34.4975
Ma03_t23870.1	Ma03_g23870	sp|Q9ZUX1|C94C1_ARATH Cytochrome P450 94C1 OS=Arabidopsis thaliana GN=CYP94C1 PE=2 SV=1//0	mRNA	1.27599	7.99774	2.16419	9.11449	4.66714	4.56302	2.31769	1.00888	2.53261	6.2739	5.47652	6.86543	3.16023	2.09373	1.60846	10.4355	4.69238	4.64753	7.19046	8.17369	3.25572	3.1126	0.557633	6.28887
Ma04_t22660.3	Ma04_g22660	sp|Q0PGJ6|AKRC9_ARATH Aldo-keto reductase family 4 member C9 OS=Arabidopsis thaliana GN=AKR4C9 PE=1 SV=1//6.55043e-77	mRNA	1.83561	2.61518	1.56964	1.24302	1.67232	3.10451	1.66812	1.40528	2.67712	2.21346	1.22024	1.15094	2.70907	3.41606	2.34247	1.32183	3.11387	2.76439	2.66673	1.97375	3.04451	2.79777	1.82973	4.44545
Ma04_t22660.1	Ma04_g22660	sp|Q0PGJ6|AKRC9_ARATH Aldo-keto reductase family 4 member C9 OS=Arabidopsis thaliana GN=AKR4C9 PE=1 SV=1//6.55043e-77	mRNA	19.0356	32.5363	62.1138	33.2616	36.713	34.398	12.4668	50.9357	23.7903	31.0615	28.3062	18.8374	18.7626	20.1181	14.4663	30.7226	19.8562	17.7405	26.3641	16.1245	15.5022	19.6792	37.7899	18.4562
Ma03_t25960.1	Ma03_g25960	sp|Q6K833|MCES2_ORYSJ mRNA cap guanine-N7 methyltransferase 2 OS=Oryza sativa subsp. japonica GN=Os02g0780600 PE=2 SV=1//1.04986e-155	mRNA	5.45923	6.40459	3.89721	4.99852	8.25056	6.58534	4.63663	5.28309	5.50727	4.75423	4.38281	4.23605	4.72537	5.07111	4.30997	7.16752	4.86286	4.18779	3.89371	5.26915	5.05684	4.13197	6.62435	5.68054
Ma03_t15360.1	Ma03_g15360	sp|P51613|CHIB_VITVI Basic endochitinase OS=Vitis vinifera GN=CHIT1B PE=2 SV=1//1.20215e-27	mRNA	0.69448	0	0.332978	0.103259	0.240968	0.261161	0.229108	1.21081	0.704553	0.713622	0.119902	0	0.30006	0.451035	0.478753	0	0.125403	0	0	0.13384	0	0.298244	0.336425	0.107716
Ma03_t25960.2	Ma03_g25960	sp|Q6K833|MCES2_ORYSJ mRNA cap guanine-N7 methyltransferase 2 OS=Oryza sativa subsp. japonica GN=Os02g0780600 PE=2 SV=1//1.04986e-155	mRNA	2.63947	1.47536	2.05547	1.99734	1.63689	3.46581	2.34987	1.57844	2.03181	2.41194	1.41152	2.46287	2.95751	1.89339	2.11925	1.8906	2.20798	1.70283	1.76499	2.13973	2.0864	1.82759	1.68917	1.82438
Ma03_t24180.1	Ma03_g24180	sp|Q9ZPX9|KIC_ARATH Calcium-binding protein KIC OS=Arabidopsis thaliana GN=KIC PE=1 SV=2//1.67934e-17	mRNA	27.7284	26.635	32.9577	10.1515	12.0091	5.855	15.2819	138.363	44.1837	14.8623	6.17256	4.79662	20.0423	72.3349	90.0076	9.96368	15.0836	6.82107	8.17082	8.13278	9.71299	14.7673	71.4441	14.511
Ma10_t07800.1	Ma10_g07800	sp|Q9SRE5|Y1666_ARATH Uncharacterized protein At1g76660 OS=Arabidopsis thaliana GN=At1g76660 PE=2 SV=1//7.56884e-10	mRNA	36.2295	18.6277	19.0147	17.2374	18.439	17.0503	15.9657	54.6947	19.1508	22.7074	20.1806	13.4033	24.1494	21.43	23.6995	22.2714	24.2208	16.2263	17.6751	15.8279	10.8305	13.8285	29.8052	14.6827
Ma03_t25970.2	Ma03_g25970	sp|Q67XQ0|Y4424_ARATH DUF21 domain-containing protein At4g14240 OS=Arabidopsis thaliana GN=CBSDUF1 PE=1 SV=1//0	mRNA	8.60951e-06	1.32069e-05	0.361212	0.148893	6.19281e-06	1.22824e-05	0.421143	1.82455e-05	1.19458e-05	1.21079e-05	8.62937e-06	0.126914	1.35371e-05	3.60698e-05	4.32126e-05	1.90655e-05	1.09512e-05	2.88071e-05	2.19176e-05	1.80106e-05	0.131552	0.220032	3.29679e-05	1.06489e-05
Ma03_t25970.1	Ma03_g25970	sp|Q67XQ0|Y4424_ARATH DUF21 domain-containing protein At4g14240 OS=Arabidopsis thaliana GN=CBSDUF1 PE=1 SV=1//0	mRNA	7.34863	6.91227	6.91915	4.50671	5.37659	4.89176	7.92231	10.5464	8.98821	4.59721	4.43168	3.26752	6.90204	9.26675	8.32909	6.4607	5.39647	4.47994	3.55501	4.57325	4.12634	5.27601	10.3035	5.02757
Ma09_t16490.1	Ma09_g16490	sp|B9DHT4|ARIA_ARATH ARM REPEAT PROTEIN INTERACTING WITH ABF2 OS=Arabidopsis thaliana GN=ARIA PE=1 SV=2//0	mRNA	24.8417	27.7534	26.3873	28.0041	27.5135	30.3702	26.9872	40.9436	27.0823	28.4524	26.508	27.5935	23.2481	27.1955	27.5769	30.7802	40.1548	30.0975	28.2301	25.3145	29.7143	25.8755	43.5054	29.6559
Ma04_t29220.1	Ma04_g29220	sp|P34788|RS18_ARATH 40S ribosomal protein S18 OS=Arabidopsis thaliana GN=RPS18A PE=1 SV=1//3.83902e-49	mRNA	1.10619	3.68631	2.83656	3.29575	3.20631	1.53345	3.40534	0.428892	1.96382	2.77723	1.65759	3.79871	1.16636	1.56149	1.0225	1.9368	1.06504	3.88501	1.67073	1.98952	4.04247	2.53121	0.892598	2.86801
Ma02_t19970.1	Ma02_g19970	-//-	mRNA	0.0329874	0	0.0203469	0	0.0443677	0.023191	0.0436397	0.569633	0.0502313	0.136438	0.0223574	0.0849397	0.0971326	0	0	0.202121	0.0956321	0	0.0823267	0.0763944	0.0217043	0.0573812	0.225435	0.118243
Ma06_t33110.1	Ma06_g33110	sp|B9RX57|LISC_RICCO Lipoyl synthase, chloroplastic OS=Ricinus communis GN=LIP1P PE=3 SV=1//0	mRNA	6.62077	7.16379	8.50565	8.23733	8.01059	8.11403	7.7007	8.64394	6.99041	8.4971	7.6614	7.32605	5.77527	5.93808	7.03534	5.95829	6.81857	5.2384	7.37833	8.16764	8.30502	5.29396	6.63813	6.45183
Ma05_t25390.1	Ma05_g25390	sp|Q8GUM4|Y3739_ARATH Uncharacterized membrane protein At3g27390 OS=Arabidopsis thaliana GN=At3g27390 PE=1 SV=2//5.50253e-126	mRNA	49.0761	36.6394	40.1765	18.4424	32.1148	21.3547	38.8333	103.752	29.0215	59.0868	38.2681	14.5213	29.9754	35.2219	34.8833	33.5569	22.0036	33.0239	16.4735	17.0439	10.5438	21.9739	62.0381	23.082
Ma11_t01130.1	Ma11_g01130	-//-	mRNA	0	0	0	0	0	0	0	0	0	0	0	0	0	0	0	0	0	0.130259	0	0	0	0	0	0
Ma03_t09640.1	Ma03_g09640	sp|F4ISY0|Y2837_ARATH WEB family protein At2g38370 OS=Arabidopsis thaliana GN=At2g38370 PE=2 SV=1//1.66526e-53	mRNA	2.84607	3.96582	3.55575	7.72336	7.21271	9.19008	3.53401	2.17117	4.46672	6.78788	3.12496	9.6438	7.68905	4.75107	5.70999	7.15269	6.65607	4.85655	9.44033	8.03317	10.2449	7.59177	4.87475	7.47252
Ma04_t34740.1	Ma04_g34740	sp|Q75H77|SAPKA_ORYSJ Serine/threonine-protein kinase SAPK10 OS=Oryza sativa subsp. japonica GN=SAPK10 PE=2 SV=1//0	mRNA	38.8664	33.1429	29.1472	29.5133	29.9599	32.8668	25.2745	29.1186	30.5349	23.2908	25.056	27.6667	40.2828	34.6561	40.1999	35.1573	34.873	26.7641	29.181	30.4009	23.8878	31.0397	32.4333	32.2533
Ma06_t25530.1	Ma06_g25530	sp|Q39013|NAC2_ARATH NAC domain-containing protein 2 OS=Arabidopsis thaliana GN=NAC002 PE=2 SV=2//6.79449e-25	mRNA	0	0	0	0	0	0	0	0	0	0	0	0	0	0	0	0	0	0	0	0	0	0	0	0
Ma01_t16180.1	Ma01_g16180	-//-	mRNA	0	0	0	0	0	0	0	0	0	0	0	0	0	0	0	0	0	0	0	0	0	0	0	0
Ma01_t02410.2	Ma01_g02410	sp|O94915|FRYL_HUMAN Protein furry homolog-like OS=Homo sapiens GN=FRYL PE=1 SV=2//4.14858e-07	mRNA	9.90147	9.75327	7.95759	11.838	15.8318	15.8003	10.2917	13.6422	9.52913	9.73225	10.5789	8.69721	7.09725	12.3325	12.0353	13.5841	18.5067	8.34093	11.0356	9.67291	8.08696	11.1577	13.4208	10.7521
Ma04_t07210.2	Ma04_g07210	-//-	mRNA	8.03082	10.1592	11.221	8.95372	9.29216	10.28	6.98148	6.11416	6.20949	8.12816	7.68021	8.70468	6.42073	8.18722	6.0236	10.6763	6.588	9.03642	8.71883	7.65247	6.84607	6.52859	7.69238	8.63728
Ma04_t07210.1	Ma04_g07210	-//-	mRNA	1.09216e-05	1.3146e-06	1.3027e-06	3.20068e-06	1.73175e-06	0.311248	1.2056e-06	0.17439	0.470064	0.178632	0.51947	0.320028	4.41133e-05	0.239178	9.68213e-06	2.61031e-06	0.709342	0.169532	1.12859	0.211384	2.49273e-06	0.267992	6.63138e-07	0.663012
Ma03_t10250.1	Ma03_g10250	sp|P24465|C71A1_PERAE Cytochrome P450 71A1 OS=Persea americana GN=CYP71A1 PE=1 SV=2//3.93837e-37	mRNA	0	0	0	0	0	0	0	0	0	0	0	0	0	0	0	0	0	0	0	0	0	0	0	0
Ma04_t22070.1	Ma04_g22070	-//-	mRNA	0.627245	0.170141	0.163647	0.453882	1.06324	1.17723	0	0	3.81687	5.65281	0	0.161555	2.14238	0.500143	1.00918	0.878694	0.180894	0.350908	1.23492	0.386552	1.92496	0	2.90497	0.477062
Ma09_t06540.1	Ma09_g06540	-//-	mRNA	0	0	0	0	0	0	0	0	0	0	0	0	0	0.102859	0	0	0	0	0	0	0	0	0	0
Ma01_t14760.1	Ma01_g14760	-//-	mRNA	0.971862	0.823682	0.583752	0.821609	1.22617	0.861777	0.221537	0.773395	0.91841	0.507464	0.775742	1.20816	0.981503	0.886439	1.08536	0.645368	0.873663	0.47454	1.39088	1.55168	1.09749	0.891126	0.65314	0.848487
Ma06_t23160.1	Ma06_g23160	sp|Q94AI7|TPL_ARATH Protein TOPLESS OS=Arabidopsis thaliana GN=TPL PE=1 SV=1//0	mRNA	1.99547	0.797525	0.542845	0.435813	1.53692	0.411846	0.330452	1.529	2.01033	0.666627	0.523584	0.659772	2.70997	2.00148	1.87838	0.830921	0.514268	0.70924	0.81279	0.586601	0.638355	0.715359	0.620018	0.451263
Ma06_t23160.2	Ma06_g23160	sp|Q94AI7|TPL_ARATH Protein TOPLESS OS=Arabidopsis thaliana GN=TPL PE=1 SV=1//0	mRNA	6.91276e-05	4.16706e-05	2.56399e-05	3.66188e-05	7.29077e-05	3.07308e-05	0.00120566	0.000264977	3.8994e-05	0.000171913	0.000184775	0.150982	7.83468e-05	0.000226303	5.3274e-05	0.000281908	0.000308823	7.29064e-05	0.000336173	5.07036e-05	0.000105782	9.51454e-05	6.00086e-05	3.68711e-05
Ma05_t16130.1	Ma05_g16130	sp|Q9FYR7|SCL8_ARATH Scarecrow-like protein 8 OS=Arabidopsis thaliana GN=SCL8 PE=2 SV=1//4.74804e-93	mRNA	6.36127	3.63258	6.52848	3.56893	6.07316	3.11708	4.19706	7.52782	3.08919	5.17745	5.63833	3.18841	2.19264	4.66368	3.44138	1.64352	3.26135	2.43527	4.76697	5.14805	3.23785	3.02225	4.55127	2.76517
Ma09_t00970.1	Ma09_g00970	-//-	mRNA	0.00679526	2.44117	2.12082	2.14529	2.98783	2.62951	2.25528	1.53536	1.16984	2.73883	2.00408	1.62524	2.80948	3.43993	5.92379	0.874288	4.10793	1.63949	0.50271	0.980715	0.454799	0.531979	2.32072	1.16423
Ma09_t00970.2	Ma09_g00970	-//-	mRNA	17.4289	11.4459	11.1535	14.1508	12.6568	14.4443	9.88681	17.8915	12.7029	11.7518	12.0653	11.2488	12.6971	14.3856	11.6924	18.3872	17.5159	14.3441	10.9147	11.0166	11.1424	13.3214	18.6374	12.4011
Ma10_t10260.1	Ma10_g10260	-//-	mRNA	7.64286	4.8215	5.91787	6.95523	7.08866	6.22337	5.79111	3.85938	5.77596	5.68579	7.92621	6.39256	6.90719	6.7943	7.8536	4.15076	6.38478	6.83832	6.62676	6.54444	6.66009	6.71445	3.48137	5.73356
Ma06_t37650.3	Ma06_g37650	sp|P42158|KC1D_ARATH Casein kinase I isoform delta-like OS=Arabidopsis thaliana GN=At4g26100 PE=2 SV=2//0	mRNA	18.406	20.7525	20.5149	21.3278	26.4881	29.3364	18.3465	29.3372	18.6152	16.7399	20.4536	21.5654	18.8431	22.7967	25.7262	29.3567	23.5203	24.575	18.7184	18.1791	17.0718	20.9591	26.5457	22.6952
Ma06_t37650.2	Ma06_g37650	sp|P42158|KC1D_ARATH Casein kinase I isoform delta-like OS=Arabidopsis thaliana GN=At4g26100 PE=2 SV=2//0	mRNA	2.12816	2.80527	1.84399	2.50424	3.59089	5.19713	1.73185	3.40454	3.81315	3.0546	1.59902	2.42553	2.29852	3.20575	3.29759	2.83254	2.98222	1.30393	2.9675	2.07675	2.74762	2.75481	3.81984	2.90787
Ma06_t37650.1	Ma06_g37650	sp|P42158|KC1D_ARATH Casein kinase I isoform delta-like OS=Arabidopsis thaliana GN=At4g26100 PE=2 SV=2//0	mRNA	0.913796	0.000195257	3.47509e-05	0.000978041	0.000342652	0.000381629	3.37996e-05	0.000136521	0.000554073	4.67901e-05	9.77278e-05	5.42526e-05	2.88021	1.69521	1.4715	4.73251e-05	7.93051e-05	0.000773709	0.000405564	3.87563e-05	0.00226593	0.3709	8.84179e-05	2.19845e-05
Ma08_t19150.1	Ma08_g19150	sp|Q9MBC2|MMT1_HORVU Methionine S-methyltransferase OS=Hordeum vulgare GN=MMT1 PE=1 SV=1//0	mRNA	0.0415738	0.0664509	0.0127825	0.156483	0.0139416	0.0871885	0.110021	0.0239102	0.0844128	0.0860226	0.0421971	0.147189	0.0122652	0.0646072	0.0424606	0.0181949	0.06028	0.0442907	0.0865313	0.0481454	0.273984	0.0603303	0	0.111407
Ma06_t28620.2	Ma06_g28620	sp|Q9M2K4|BZP61_ARATH Basic leucine zipper 61 OS=Arabidopsis thaliana GN=BZIP61 PE=1 SV=1//1.95538e-94	mRNA	1.3614e-06	0.289191	0	0.0915022	1.36196e-05	0.128918	0.250227	0	2.43211e-06	6.28813e-06	3.23847e-06	0.161825	2.55001e-06	0	0.0542581	1.96697e-06	0.0178872	0	1.6755e-05	1.57564e-06	0.43928	5.18795e-06	0	1.26118e-06
Ma08_t09180.1	Ma08_g09180	sp|P43311|PPO_VITVI Polyphenol oxidase, chloroplastic OS=Vitis vinifera PE=1 SV=1//1.07115e-102	mRNA	0.0241653	0	0.0299255	0.0281205	0	0	0	0	0	0.0332935	0.0328228	0.0933376	0.0283933	0	0	0	0	0	0.0401662	0.0373033	0.444279	0	0	0
Ma04_t34990.1	Ma04_g34990	sp|Q9Y5A9|YTHD2_HUMAN YTH domain-containing family protein 2 OS=Homo sapiens GN=YTHDF2 PE=1 SV=2//7.58558e-57	mRNA	34.4272	23.3053	22.5978	26.646	32.9892	37.8951	16.6931	27.7968	23.4962	19.6489	23.1138	20.669	37.9495	38.0236	40.4453	43.2079	49.7736	44.04	33.7666	33.3212	24.2143	26.9796	45.2589	23.5578
Ma06_t28620.1	Ma06_g28620	sp|Q9M2K4|BZP61_ARATH Basic leucine zipper 61 OS=Arabidopsis thaliana GN=BZIP61 PE=1 SV=1//1.95538e-94	mRNA	0.291785	0.276202	0	0.446712	0.229706	0.00965773	0.00859649	0	1.03666	1.005	0.363308	1.09142	0.199977	0	0.374043	0.127703	0.0174565	0	0.28289	0.337815	2.46909	0.281577	0	1.28362
Ma04_t40020.1	Ma04_g40020	-//-	mRNA	0	0.0865337	0.249697	0.0776968	0.452351	0.387857	0.434514	0	0.133546	0	0	0.169473	0.381583	0	0.142046	0	0	0	0.217585	0.304496	0.0854666	0.453855	0	0.484351
Ma11_t24840.2	Ma11_g24840	sp|Q3AQ69|Y1601_CHLCH UPF0301 protein Cag_1601 OS=Chlorobium chlorochromatii (strain CaD3) GN=Cag_1601 PE=3 SV=1//1.92357e-16	mRNA	1.09488	0.652041	1.32712	0.87426	1.836	1.76201	0.127898	0.239332	0.542951	0.668426	0.568002	1.02115	1.19586	1.31758	0.301987	1.30075	0.967098	0.905757	0.541975	0.626993	0.373559	1.00973	0.993001	0.875816
Ma11_t24840.3	Ma11_g24840	sp|Q3AQ69|Y1601_CHLCH UPF0301 protein Cag_1601 OS=Chlorobium chlorochromatii (strain CaD3) GN=Cag_1601 PE=3 SV=1//1.92357e-16	mRNA	7.90979	12.3636	9.37131	10.7756	17.1521	17.8203	8.43078	12.1975	8.96572	7.89979	7.8466	10.1457	8.39143	10.1639	10.3664	16.7127	14.445	11.3811	8.27224	9.29216	7.77173	7.80568	16.0658	12.458
Ma11_t24840.1	Ma11_g24840	sp|Q3AQ69|Y1601_CHLCH UPF0301 protein Cag_1601 OS=Chlorobium chlorochromatii (strain CaD3) GN=Cag_1601 PE=3 SV=1//1.92357e-16	mRNA	1.42047e-05	1.67775e-05	1.85016e-05	0.460142	6.35775e-06	0.327335	9.45e-06	1.76784e-05	3.42512e-06	0.248023	0.42945	0.000186766	4.29886e-06	0.189066	8.38887e-05	2.86906e-05	7.39624e-06	9.60089e-06	0.335794	9.99035e-06	3.33563e-05	0.13378	0.367679	6.46818e-06
Ma04_t03250.1	Ma04_g03250	sp|O49545|BAME1_ARATH Leucine-rich repeat receptor-like serine/threonine-protein kinase BAM1 OS=Arabidopsis thaliana GN=BAM1 PE=1 SV=1//0	mRNA	0.38797	0.205605	0.418766	0.503962	0.406014	0.568405	0.513382	0.326493	0.365056	0.535224	0.268861	0.523846	0.256912	0.56439	0.434511	0.281613	0.315584	0.322636	0.504267	0.584462	0.785957	0.516405	0.480756	0.608284
Ma05_t32020.2	Ma05_g32020	sp|Q9LFP7|Y5158_ARATH Probable receptor-like protein kinase At5g15080 OS=Arabidopsis thaliana GN=At5g15080 PE=2 SV=1//6.36192e-57	mRNA	4.6355	1.56449	3.44513	2.445	1.9612	3.67047	0.000835096	1.28565	0.678808	1.56904	1.31415	2.20629	0.0032957	4.91675	1.9367	3.57011	4.13916	1.72593	2.79769	2.38243	3.14901	0.547902	0.997787	3.19771
Ma05_t32020.3	Ma05_g32020	sp|Q9LFP7|Y5158_ARATH Probable receptor-like protein kinase At5g15080 OS=Arabidopsis thaliana GN=At5g15080 PE=2 SV=1//6.36192e-57	mRNA	5.09828	3.2751	2.17495	2.21721	1.59748	1.00511	3.77908	9.87743	4.78973	2.3053	2.81195	1.1278	6.84923	2.9434	6.49344	2.56404	1.55964	1.83468	0.717577	1.49647	0.440413	3.52331	7.78488	1.60652
Ma05_t32020.1	Ma05_g32020	sp|Q9LFP7|Y5158_ARATH Probable receptor-like protein kinase At5g15080 OS=Arabidopsis thaliana GN=At5g15080 PE=2 SV=1//6.36192e-57	mRNA	0.278764	0.356553	1.26108	5.44393e-06	0.359573	0.37425	0.155538	0.96379	7.33059e-16	0.185282	0.203966	0.328968	0.159879	0.427683	0.488281	0.371831	0.366465	0.179989	1.47412	4.65536e-06	0.210233	0.15409	0.806829	0.308442
Ma05_t08490.2	Ma05_g08490	sp|A7LXU3|BGH3B_BACO1 Beta-glucosidase BoGH3B OS=Bacteroides ovatus (strain ATCC 8483 / DSM 1896 / JCM 5824 / NCTC 11153) GN=BACOVA_02659 PE=1 SV=1//6.37654e-82	mRNA	0.380203	1.05268	9.62201e-23	0.454855	7.92985e-15	5.32915e-33	2.03703	2.53579	1.17889	2.13046	3.56463	1.53122	0.944594	1.43257	3.51387	8.81803e-09	1.66461	2.99347	1.83728	2.24021	2.93117	1.31147	2.68069	0.44021
Ma05_t08490.3	Ma05_g08490	sp|A7LXU3|BGH3B_BACO1 Beta-glucosidase BoGH3B OS=Bacteroides ovatus (strain ATCC 8483 / DSM 1896 / JCM 5824 / NCTC 11153) GN=BACOVA_02659 PE=1 SV=1//6.37654e-82	mRNA	2.26281	0.0127821	0.00491797	0.00531526	0.00153861	0.0254997	3.20574	4.23342	7.56515	0.00478891	0.00343735	3.8666	35.6949	0.00419942	15.8467	5.91876	6.65782	0.0206588	0.00334269	0.00271007	0.00178775	18.9792	5.34783	0.00260906
Ma05_t08490.1	Ma05_g08490	sp|A7LXU3|BGH3B_BACO1 Beta-glucosidase BoGH3B OS=Bacteroides ovatus (strain ATCC 8483 / DSM 1896 / JCM 5824 / NCTC 11153) GN=BACOVA_02659 PE=1 SV=1//6.37654e-82	mRNA	3.88027	5.90973	2.0044	6.76066	3.43497	2.73775	11.5703	1.66744	11.4459	9.93722	5.15383	17.4767	19.3044	3.95481	10.5065	6.11184	1.13751	6.86757	4.8247	5.44515	10.6448	11.4511	2.48123	13.1443
Ma05_t08490.6	Ma05_g08490	sp|A7LXU3|BGH3B_BACO1 Beta-glucosidase BoGH3B OS=Bacteroides ovatus (strain ATCC 8483 / DSM 1896 / JCM 5824 / NCTC 11153) GN=BACOVA_02659 PE=1 SV=1//6.37654e-82	mRNA	68.9092	90.1952	54.0789	32.3609	32.181	28.2268	64.4426	97.5572	55.441	68.4984	49.6982	50.0313	53.093	66.1882	45.821	49.6943	39.6704	52.712	48.6742	49.6807	92.4649	58.6972	120.658	117.109
Ma05_t22460.1	Ma05_g22460	sp|Q9LYP1|RBL3_ARATH RHOMBOID-like protein 3 OS=Arabidopsis thaliana GN=RBL3 PE=2 SV=1//7.65003e-60	mRNA	0.160275	0	0	0	0	0	0	0	0.243914	0	0	0	0	0	0	0	0	0	0	0.247137	0.103688	0.091882	0	0.297224
Ma05_t08490.4	Ma05_g08490	sp|A7LXU3|BGH3B_BACO1 Beta-glucosidase BoGH3B OS=Bacteroides ovatus (strain ATCC 8483 / DSM 1896 / JCM 5824 / NCTC 11153) GN=BACOVA_02659 PE=1 SV=1//6.37654e-82	mRNA	1.22206	1.16633	0.49143	0.528566	0.203977	7.60706e-130	0.404698	2.03853	0.154991	0.96913	1.346	0.785646	0.180881	0.946386	0.773132	9.22522e-32	0.145335	0.869506	1.78626e-40	0.471887	1.96481	1.38369	0.189911	1.26916
Ma05_t08490.5	Ma05_g08490	sp|A7LXU3|BGH3B_BACO1 Beta-glucosidase BoGH3B OS=Bacteroides ovatus (strain ATCC 8483 / DSM 1896 / JCM 5824 / NCTC 11153) GN=BACOVA_02659 PE=1 SV=1//6.37654e-82	mRNA	2.53346	1.57615	4.22685e-30	0.156461	1.229	1.88337e-44	0.752797	0.0312113	1.03448	4.17567e-17	0.000132636	1.90045	2.65723	2.66977	5.36157	1.6991e-11	2.38152e-13	1.79302	0.938765	0.820613	0.00858671	0.0220488	1.26979e-11	1.08483
Ma06_t24920.1	Ma06_g24920	-//-	mRNA	42.5344	42.6401	43.9728	46.3641	45.1971	44.1551	53.0447	60.5273	43.9273	49.3851	47.5299	45.5676	43.0565	43.8429	39.8351	51.5668	54.0993	52.8228	45.9326	47.691	55.4536	51.4779	59.8272	47.035
Ma01_t20660.1	Ma01_g20660	sp|A6YIH8|C7D55_HYOMU Premnaspirodiene oxygenase OS=Hyoscyamus muticus GN=CYP71D55 PE=1 SV=1//8.07024e-74	mRNA	0	0	0	0	0.125932	0	0	0	0.0918917	0.124062	0	0.233294	0	0.117917	0.20061	0.158595	0.261655	0	0.298551	0.418931	0	0	0.175448	0
Ma06_t38320.2	Ma06_g38320	sp|Q9MA41|CTL1_ARATH Chitinase-like protein 1 OS=Arabidopsis thaliana GN=CTL1 PE=1 SV=1//2.19241e-152	mRNA	3.38852	7.71327	6.92478	6.41659	9.1572	9.3759	5.62751	4.44887	11.8813	12.2904	11.3019	34.0477	23.6503	10.1392	8.65508	7.89474	4.57513	2.07707	9.36768	14.4125	11.653	12.8348	4.42301	17.0928
Ma08_t17680.1	Ma08_g17680	-//-	mRNA	0.0439192	0.0564852	0.217312	0.280878	0.236853	0.217236	0.116181	0.101196	0.0891656	0.151303	0.268286	0.310998	0.0774591	0.137396	0.158776	0.0384436	0.0954675	0.218007	0.0730211	0.2373	0.201983	0.203525	0	0.157883
Ma06_t38320.1	Ma06_g38320	sp|Q9MA41|CTL1_ARATH Chitinase-like protein 1 OS=Arabidopsis thaliana GN=CTL1 PE=1 SV=1//2.19241e-152	mRNA	3.56855	7.03739	11.9665	14.0677	6.1575	10.7114	10.9696	4.02768	9.61994	17.0613	8.60922	22.274	11.3755	5.22828	7.56334	5.37889	3.48511	8.40637	16.8231	9.66713	18.5482	18.3952	2.68538	17.9146
Ma04_t19780.1	Ma04_g19780	sp|Q8VYR9|KEA5_ARATH K(+) efflux antiporter 5 OS=Arabidopsis thaliana GN=KEA5 PE=2 SV=1//0	mRNA	9.61425	9.18267	11.5457	8.79304	8.6088	9.67854	10.9889	22.3417	10.9396	10.165	11.0139	9.64435	7.91879	12.0391	10.846	9.53753	10.6472	9.53692	7.82353	7.17482	7.96659	9.31177	17.1878	8.36236
Ma04_t23810.1	Ma04_g23810	sp|Q9LNQ1|TI231_ARATH Mitochondrial import inner membrane translocase subunit TIM23-1 OS=Arabidopsis thaliana GN=TIM23-1 PE=2 SV=1//1.17817e-60	mRNA	22.1143	16.8777	19.8025	14.2317	18.3562	10.9664	22.2375	21.5755	16.3777	24.2131	26.2548	13.9115	15.8269	14.4641	13.2769	13.3615	11.6458	19.6926	14.4786	14.4719	12.4255	13.0997	15.0331	13.6153
Ma03_t27870.1	Ma03_g27870	sp|P48496|TPIC_SPIOL Triosephosphate isomerase, chloroplastic OS=Spinacia oleracea GN=TPIP1 PE=1 SV=1//1.24953e-161	mRNA	34.2154	39.0729	39.2643	30.9216	24.3975	23.2361	40.0214	39.0172	38.6486	34.212	38.6823	30.6966	32.0455	34.1465	34.9594	20.7921	20.4491	25.8455	20.8041	23.7449	33.4679	35.5284	29.9951	33.8594
Ma03_t31430.1	Ma03_g31430	-//-	mRNA	0	0	0	0	0	0	0	107.518	0	0	0	0	0	0	0	0	33.561	0	0	0	0	0	0	0
Ma07_t09070.1	Ma07_g09070	sp|Q6Z8B9|P2C12_ORYSJ Probable protein phosphatase 2C 12 OS=Oryza sativa subsp. japonica GN=Os02g0224100 PE=2 SV=1//9.18098e-99	mRNA	18.4001	25.6247	24.2729	37.0213	23.4727	15.0702	30.8499	15.6042	30.9753	26.2895	28.8351	19.2388	31.4169	15.5718	16.2152	26.4227	26.6537	22.1484	19.9741	21.0219	21.2476	34.8853	10.5512	22.2519
Ma11_t24690.1	Ma11_g24690	sp|Q56Z59|PATL3_ARATH Patellin-3 OS=Arabidopsis thaliana GN=PATL3 PE=1 SV=2//1.13888e-142	mRNA	7.55824	8.06168	2.95677	3.77368	6.60512	8.29649	3.05952	10.6887	3.84491	6.58482	3.24872	4.72521	4.89481	6.1893	5.71789	11.0607	17.4174	6.61218	7.9186	7.37409	3.57236	1.26318	7.75505	9.23233
Ma02_t06570.2	Ma02_g06570	-//-	mRNA	1.00747	1.78786	2.60509	1.48597	1.52273	1.47249	1.8865	1.69003	2.19723	1.74134	1.99863	1.70391	1.92581	2.85874	2.12165	2.37894	2.43829	1.98367	0.87203	1.06919	2.20991	2.01064	3.04598	2.07474
Ma02_t06570.3	Ma02_g06570	-//-	mRNA	0.000116694	2.31253e-05	4.4982e-05	3.665e-05	0.00133672	2.3567e-05	2.86471e-05	8.85985e-05	4.90008e-05	0.000880343	0.000367214	8.78262e-05	3.43938e-05	5.70224e-05	6.48243e-06	1.70806e-05	7.00335e-05	0.000173553	2.6237e-05	2.2126e-05	2.23371e-05	7.42457e-05	0.000136073	2.81586e-05
Ma02_t06570.1	Ma02_g06570	-//-	mRNA	9.01187	11.2172	5.37611	9.39481	5.04235	4.82371	7.63083	10.1624	9.13773	7.42216	9.49559	7.7088	6.92207	9.30474	9.45751	8.57227	9.02345	8.29512	6.0048	7.25959	8.09314	10.4133	9.98863	7.43946
Ma05_t10940.1	Ma05_g10940	sp|Q9STN5|Y4833_ARATH Uncharacterized protein At4g08330, chloroplastic OS=Arabidopsis thaliana GN=At4g08330 PE=1 SV=1//4.28227e-07	mRNA	0.490779	0.51191	0	0.518469	0.267876	0.142316	0.389104	0.227005	0.0996139	0.134933	0.536832	0.379157	0.68658	0.374215	0.989461	0.171844	0.355134	0.693482	0.406562	0.378614	0.512191	0.45266	0.286465	0.417652
Ma03_t27860.1	Ma03_g27860	sp|Q9LT17|BBR_ARATH E3 ubiquitin ligase BIG BROTHER-related OS=Arabidopsis thaliana GN=BBR PE=2 SV=1//4.18691e-75	mRNA	38.6447	27.1861	23.7373	23.7133	23.5158	23.3853	22.588	43.0541	25.13	27.3068	22.9533	22.9169	34.9217	23.4992	32.7358	26.2984	25.4376	21.874	26.091	25.1223	22.2031	24.7376	29.4049	27.0241
Ma04_t20320.1	Ma04_g20320	sp|Q5N9X2|LAC4_ORYSJ Laccase-4 OS=Oryza sativa subsp. japonica GN=LAC4 PE=2 SV=1//1.3508e-29	mRNA	0	0	0	0	0	0	0	0	0	0	0	0	0	0	0	0	0	0	0	0	0	0	0	0
Ma05_t29780.1	Ma05_g29780	-//-	mRNA	2.50389	1.87287	2.80209	3.93248	3.92758	3.72848	2.50208	2.0327	2.04808	2.97981	2.10076	2.36557	2.56599	2.47404	2.59486	2.5859	3.28976	2.96511	4.04529	4.4775	2.6775	2.08839	4.18486	2.8218
Ma11_t07540.1	Ma11_g07540	sp|Q38908|XTH30_ARATH Probable xyloglucan endotransglucosylase/hydrolase protein 30 OS=Arabidopsis thaliana GN=XTH30 PE=2 SV=2//5.56808e-100	mRNA	0	0.0737091	0.0708964	0	0.0771077	0	0.074408	0	0	0	0.231487	0	0.0655153	0	0.180619	0.0986116	0.0814865	0	0.0932327	0	0	0.194563	0	0.0687425
Ma06_t37530.1	Ma06_g37530	sp|Q8LB08|ADT4_ARATH ADP,ATP carrier protein ER-ANT1 OS=Arabidopsis thaliana GN=ER-ANT1 PE=2 SV=2//5.48079e-141	mRNA	6.35966	10.9087	5.33747	7.55142	7.76629	7.66802	6.11241	37.4184	7.53118	7.86584	7.76916	9.47703	7.49448	6.36397	5.69838	12.6285	14.1602	7.59203	8.41165	9.58898	6.6796	8.51611	17.7965	10.4846
Ma01_t17510.1	Ma01_g17510	sp|Q93VT8|ACLB1_ORYSJ ATP-citrate synthase beta chain protein 1 OS=Oryza sativa subsp. japonica GN=ACLB-1 PE=2 SV=1//0	mRNA	3.02246	1.08111	7.37931	1.38911	4.66354	8.32407	4.79145	0.971368	12.5361	8.56149	3.44842	13.8647	6.32377	4.51052	4.5891	0.834198	3.27644	4.38809	11.7835	9.52253	21.2286	4.67578	0.638204	6.25338
Ma03_t11540.1	Ma03_g11540	sp|P25766|RLGP1_ORYSJ Ras-related protein RGP1 OS=Oryza sativa subsp. japonica GN=RGP1 PE=2 SV=2//2.31475e-138	mRNA	6.63775	4.5107	5.01639	3.68761	4.13392	3.16918	5.41845	19.5112	4.78595	11.132	5.88162	3.08231	3.65121	4.98771	5.43377	5.39758	4.14957	3.49126	3.61169	3.41469	2.94371	3.14356	9.54053	3.76639
Ma11_t04470.1	Ma11_g04470	-//-	mRNA	0.896101	0.521561	0.501649	0.772655	0.36209	1.20447	0.506012	0.598423	1.03863	0.873812	1.07279	0.659436	0.436897	0.511154	0.442574	2.24169	1.10743	1.61083	0	0.39444	0.817932	1.16437	0.740894	0.975025
Ma08_t23760.1	Ma08_g23760	sp|Q00423|HMGYA_SOYBN HMG-Y-related protein A OS=Glycine max PE=2 SV=1//7.42342e-15	mRNA	51.8318	47.0829	45.9501	53.9814	77.5972	68.6658	35.6464	50.2374	30.6521	44.5033	38.521	53.0311	45.9499	34.5693	36.7177	97.9119	96.0005	71.2744	92.3506	91.122	52.7359	45.492	56.6146	59.9967
Ma02_t10690.1	Ma02_g10690	sp|O23207|FQRL2_ARATH Probable NAD(P)H dehydrogenase (quinone) FQR1-like 2 OS=Arabidopsis thaliana GN=At4g36750 PE=1 SV=1//8.10742e-100	mRNA	87.9868	63.5631	70.7263	44.3733	51.9105	48.6907	57.3743	116.476	51.9046	56.1714	50.6695	41.8404	60.4971	62.1829	66.8058	61.5451	49.2319	38.3949	47.8276	45.2833	30.9931	48.5595	95.1337	61.3638
Ma00_t01340.1	Ma00_g01340	sp|P50155|PSBA_PICAB Photosystem II protein D1 OS=Picea abies GN=psbA PE=2 SV=2//2.55824e-13	mRNA	0	0	0	0	0	0	0	0	0	0	0	0	0	0	0	0	0	0	0	0	0	0	0	0
Ma05_t23900.1	Ma05_g23900	sp|Q8LB72|PHR2_ARATH Blue-light photoreceptor PHR2 OS=Arabidopsis thaliana GN=PHR2 PE=2 SV=2//5.14964e-123	mRNA	15.0962	18.4562	19.3722	8.52857	11.2272	8.59887	23.883	21.8714	15.8395	16.5793	15.5527	9.4458	8.23069	13.6987	11.4344	11.0302	8.08911	12.2956	7.38293	7.44194	10.3093	9.79936	16.0923	9.34475
Ma08_t15680.1	Ma08_g15680	sp|Q38908|XTH30_ARATH Probable xyloglucan endotransglucosylase/hydrolase protein 30 OS=Arabidopsis thaliana GN=XTH30 PE=2 SV=2//4.21019e-131	mRNA	2.10608	2.74141	1.54222	2.22202	0.616772	0.611477	2.17922	0.667922	1.87236	1.21166	1.61012	1.50737	1.66016	2.04124	2.6369	0.426208	0.656949	0.346411	0.960679	1.38042	1.06243	2.28635	1.33842	1.46917
Ma03_t10640.1	Ma03_g10640	sp|Q9FF99|AAP7_ARATH Probable amino acid permease 7 OS=Arabidopsis thaliana GN=AAP7 PE=2 SV=1//8.39857e-165	mRNA	6.90043	7.77113	6.85578	12.8669	11.2653	10.0655	7.914	8.06864	7.53382	10.9464	10.6941	11.2998	8.26336	5.81379	5.80764	10.1094	9.96999	8.60509	12.7918	14.3216	10.4124	9.88012	4.59754	11.6342
Ma08_t21750.1	Ma08_g21750	-//-	mRNA	2.35619	3.49018	0.594033	1.09353	1.19929	1.23532	0.797826	5.61323	3.4846	2.56368	1.37707	1.43499e-05	1.40206	1.8816	1.03079	2.29953	2.852	1.89315	1.83217	0.362018	0.863301	1.53897	3.89578	0.966105
Ma11_t11710.1	Ma11_g11710	sp|Q9LDD1|BRG3_ARATH Probable BOI-related E3 ubiquitin-protein ligase 3 OS=Arabidopsis thaliana GN=BRG3 PE=1 SV=1//8.07902e-31	mRNA	26.0034	27.487	29.4879	30.2787	31.2943	32.2554	24.3671	25.029	25.7116	26.7465	26.3364	28.3579	25.0826	21.7949	25.1961	29.3418	27.8386	25.2799	29.5403	29.9332	23.2843	23.3176	26.6346	29.3095
Ma02_t12660.1	Ma02_g12660	sp|Q9C9H7|RLP12_ARATH Receptor-like protein 12 OS=Arabidopsis thaliana GN=RLP12 PE=2 SV=2//3.76007e-55	mRNA	0.220142	0.613452	0.63786	1.83131	0.626034	0.635179	0.119934	0.149004	0.407534	0.892949	0.911911	1.85056	0.855078	0.322447	0.424275	0.544074	0.488121	0.202268	0.581993	0.379892	0.972227	1.03683	0.0758836	0.38609
Ma05_t27500.1	Ma05_g27500	sp|Q9FLP6|SUMO2_ARATH Small ubiquitin-related modifier 2 OS=Arabidopsis thaliana GN=SUMO2 PE=1 SV=1//1.43547e-51	mRNA	2.31834	1.07969	2.85588	3.01233	2.53417	2.15252	1.99413	1.17377	1.63594	2.89652	2.3757	2.59609	2.65954	3.43217	2.14369	1.58838	1.3096	1.8387	2.98609	3.418	2.72401	2.64839	2.14523	1.89056
Ma01_t17300.1	Ma01_g17300	-//-	mRNA	11.0869	20.3965	20.862	27.7698	37.0422	27.5839	18.2054	6.73298	16.2366	18.37	26.2042	37.836	42.0469	27.5706	28.5936	29.887	46.6609	54.5036	43.3441	53.934	44.1156	69.7942	8.14531	48.412
Ma10_t28780.1	Ma10_g28780	sp|Q5M8S7|NIPA_XENTR NIPA-like protein OS=Xenopus tropicalis GN=zc3hc1 PE=2 SV=1//2.46468e-09	mRNA	42.8808	36.2941	41.558	56.4351	58.3443	64.5603	30.2407	42.4762	32.0942	38.8012	38.6912	39.4158	46.213	42.3033	41.9219	65.4751	63.8302	54.2964	54.8829	55.9256	42.0217	41.6546	43.5292	41.1874
Ma01_t09940.1	Ma01_g09940	sp|P62302|RS13_SOYBN 40S ribosomal protein S13 OS=Glycine max GN=RPS13 PE=2 SV=1//2.1724e-89	mRNA	35.1591	23.088	27.1483	25.9746	19.3066	17.4026	50.8562	15.0506	31.6797	38.3449	51.2346	35.1765	28.4289	20.5709	26.9802	10.1481	10.6588	26.1214	22.9117	21.0398	32.0577	28.5471	12.7592	24.4702
Ma11_t16760.1	Ma11_g16760	-//-	mRNA	0	0	0	0	0	0	0	0	0	0	0	0	0	0	0	0	0	0	0	0	0	0	0	0
Ma07_t19950.1	Ma07_g19950	sp|Q9FRH3|CAP13_ARATH Putative clathrin assembly protein At1g25240 OS=Arabidopsis thaliana GN=At1g25240 PE=3 SV=1//1.15896e-49	mRNA	1.87365	1.4123	1.49154	2.10322	2.69982	1.24736	3.64616	5.70626	2.7983	4.42207	2.6893	4.13139	1.62082	1.77824	2.11239	1.20648	2.15346	1.83271	2.86469	2.72623	5.06598	1.99617	2.56369	2.60587
Ma11_t10620.1	Ma11_g10620	sp|Q8RXT9|GDL8_ARATH GDSL esterase/lipase At1g28590 OS=Arabidopsis thaliana GN=At1g28590 PE=2 SV=2//3.02942e-92	mRNA	0	0	0	0	0	0	0	0	0	0	0	0	0	0	0	0	0	0	0	0	0	0	0	0
Ma08_t34530.1	Ma08_g34530	sp|Q7ZV80|SPF30_DANRE Survival of motor neuron-related-splicing factor 30 OS=Danio rerio GN=smndc1 PE=2 SV=1//4.68933e-17	mRNA	34.8864	34.5859	33.8968	31.2219	31.5928	27.1645	31.185	40.575	38.6646	28.6269	28.3414	29.9175	33.7856	34.631	46.911	41.0686	39.9099	36.6427	25.5122	28.8579	32.533	35.7937	45.1097	37.7387
Ma07_t17650.1	Ma07_g17650	-//-	mRNA	4.90816	9.95771	5.1992	10.2158	6.44741	5.24921	9.00654	7.94788	5.56983	10.8998	8.88433	9.83395	2.58908	4.7768	4.15264	7.72365	8.78845	8.47961	7.74218	8.8104	11.3236	7.30805	6.29166	7.62214
Ma06_t13110.2	Ma06_g13110	sp|O64843|CID7_ARATH Polyadenylate-binding protein-interacting protein 7 OS=Arabidopsis thaliana GN=CID7 PE=1 SV=1//3.64413e-159	mRNA	6.45231	1.75001	2.26579	3.16571	3.00066	3.54207	0.747948	4.49352	1.21131	2.83728	1.82652	2.45147	2.11749	1.50246	5.52306	3.25518	3.25364	2.89978	0.966554	1.42614	1.42474	2.49618	3.82677	2.66514
Ma06_t13110.1	Ma06_g13110	sp|O64843|CID7_ARATH Polyadenylate-binding protein-interacting protein 7 OS=Arabidopsis thaliana GN=CID7 PE=1 SV=1//3.64413e-159	mRNA	21.9476	20.1745	22.4015	19.9793	27.9611	23.1641	19.9504	35.6147	21.407	22.7225	22.9011	17.0946	23.3406	22.7258	21.0343	26.6671	26.5185	18.3751	17.409	19.5256	14.4201	18.7792	30.3165	17.7786
Ma03_t18140.2	Ma03_g18140	sp|Q2R837|ALFL8_ORYSJ PHD finger protein ALFIN-LIKE 8 OS=Oryza sativa subsp. japonica GN=Os11g0244800 PE=2 SV=1//6.73564e-108	mRNA	34.8137	43.1635	46.3808	42.3036	41.8845	38.8768	46.2669	35.8975	36.0256	39.7395	50.7614	36.4471	29.7039	32.6623	30.2398	42.2158	40.2512	47.1034	40.2585	36.2783	37.6191	35.3985	36.8994	38.4414
Ma03_t18140.1	Ma03_g18140	sp|Q2R837|ALFL8_ORYSJ PHD finger protein ALFIN-LIKE 8 OS=Oryza sativa subsp. japonica GN=Os11g0244800 PE=2 SV=1//6.73564e-108	mRNA	1.32941	1.95759	2.40616	1.95265	1.79671	1.34569	2.68647	1.58328	1.57393	1.47347	2.64949	1.56486	1.78547	1.5972	1.88676	2.54542	1.93455	1.31487	1.18692	0.846513	0.979898	1.26842	0.696595	1.55174
Ma09_t19030.1	Ma09_g19030	sp|Q39165|OLEO2_ARATH Oleosin 21.2 kDa OS=Arabidopsis thaliana GN=At5g40420 PE=1 SV=1//3.40945e-19	mRNA	0	0	0	0	0	0	0	0	0	0	0	0.181157	0	0	0	0	0	0	0	0	0.179177	0	0	0
Ma05_t28680.1	Ma05_g28680	sp|Q94AS9|CNGC4_ARATH Cyclic nucleotide-gated ion channel 4 OS=Arabidopsis thaliana GN=CNGC4 PE=2 SV=2//0	mRNA	0.862687	1.42185	1.12063	0.500425	1.22188	1.81763	0.75408	2.5534	0.938329	1.18949	0.897657	1.19	0.59897	0.633802	0.63242	1.53722	0.915582	1.04964	1.38427	1.21302	0.871941	0.732595	1.50415	1.43488
Ma08_t34520.1	Ma08_g34520	sp|B9FDR3|TNPO1_ORYSJ Transportin-1 OS=Oryza sativa subsp. japonica GN=TRN1 PE=3 SV=2//0	mRNA	38.9674	40.4814	40.3128	29.8781	30.4311	28.2867	37.848	45.3379	36.1478	35.0684	44.1065	31.2856	29.6372	37.579	36.0759	35.3432	30.4197	36.4107	22.2903	21.9979	24.6218	31.9305	42.791	31.2355
Ma05_t09350.2	Ma05_g09350	sp|Q0DGD7|BGAL8_ORYSJ Beta-galactosidase 8 OS=Oryza sativa subsp. japonica GN=Os05g0539400 PE=2 SV=1//0	mRNA	1.91832	2.3845	1.99999	0.934445	1.30411	2.40712	2.39949	2.39445	1.59217	2.65217	2.386	1.90303	2.95222	3.97179	3.9435	1.18571	2.37813	2.76943	1.56346	1.12819	1.79367	2.83296	2.12027	4.25618
Ma05_t09350.3	Ma05_g09350	sp|Q0DGD7|BGAL8_ORYSJ Beta-galactosidase 8 OS=Oryza sativa subsp. japonica GN=Os05g0539400 PE=2 SV=1//0	mRNA	8.26831	13.086	5.85833	5.40322	7.96994	7.90125	10.7968	9.0496	9.11483	7.81616	8.10565	12.1596	8.69736	12.9799	13.4986	7.46184	7.40027	10.6929	7.33183	7.50529	8.4165	9.84786	10.7383	9.71707
Ma05_t09350.1	Ma05_g09350	sp|Q0DGD7|BGAL8_ORYSJ Beta-galactosidase 8 OS=Oryza sativa subsp. japonica GN=Os05g0539400 PE=2 SV=1//0	mRNA	3.79708e-05	2.68427e-05	2.14855e-05	7.54798e-06	3.14389e-05	6.06193e-05	3.33563e-05	7.47722e-05	9.2975e-05	2.22692e-05	2.25429e-05	1.12161e-05	4.18666e-05	0.000126866	8.4942e-05	1.76026e-05	3.56553e-05	7.71411e-05	5.67202e-05	1.50336e-05	2.45791e-05	3.01908e-05	3.8074e-05	2.56013e-05
Ma06_t32800.1	Ma06_g32800	sp|A1DA48|NPIIA_NEOFI Neutral protease 2 homolog NFIA_031120 OS=Neosartorya fischeri (strain ATCC 1020 / DSM 3700 / FGSC A1164 / NRRL 181) GN=NFIA_031120 PE=3 SV=1//2.10356e-06	mRNA	1.44649	0.850889	0.833862	0.434885	2.16802	0.604765	1.20993	0.000192343	1.11985	0.312949	1.03664	0.697831	1.02861	0.225833	1.52385	1.24098	0.939076	1.53203	6.66938e-05	0.000118721	0.824514	0.789815	1.07428	0.667507
Ma06_t32800.2	Ma06_g32800	sp|A1DA48|NPIIA_NEOFI Neutral protease 2 homolog NFIA_031120 OS=Neosartorya fischeri (strain ATCC 1020 / DSM 3700 / FGSC A1164 / NRRL 181) GN=NFIA_031120 PE=3 SV=1//2.10356e-06	mRNA	11.2429	10.3228	10.3235	9.67839	9.73552	10.6179	10.7368	11.6038	11.0234	10.9184	10.3652	10.6653	11.1784	12.7791	12.6928	10.1299	10.9351	11.6223	9.94278	9.93529	8.99724	11.7437	11.5486	9.70401
Ma08_t10070.2	Ma08_g10070	sp|Q9ULC4|MCTS1_HUMAN Malignant T-cell-amplified sequence 1 OS=Homo sapiens GN=MCTS1 PE=1 SV=1//1.85385e-58	mRNA	1.14648	1.96476	5.80679e-06	1.07677	1.26015	1.23487	1.35395	2.51751	2.05469	0.939668	1.64455	2.29114	1.49316	2.24513	1.77393	2.55568	3.03342	1.5146	0.680627	1.8151	2.95581	2.08293	1.91937	1.43952
Ma08_t10070.1	Ma08_g10070	sp|Q9ULC4|MCTS1_HUMAN Malignant T-cell-amplified sequence 1 OS=Homo sapiens GN=MCTS1 PE=1 SV=1//1.85385e-58	mRNA	37.5163	37.0502	39.3109	24.2415	22.4317	23.3106	47.526	41.5442	49.3194	31.6898	41.7934	36.7372	39.5037	34.0498	36.5677	20.0927	18.7539	23.692	18.9331	19.4702	26.0439	38.8937	42.7694	34.2085
Ma10_t05740.3	Ma10_g05740	sp|P59234|YIPL_SOLTU Protein yippee-like OS=Solanum tuberosum PE=2 SV=1//1.04388e-68	mRNA	26.7206	30.399	31.7079	20.2538	31.207	32.7826	29.6574	67.2453	33.0377	31.8522	33.6926	35.6946	30.4914	31.3612	37.0592	32.0405	27.3801	20.6683	26.0035	30.655	27.9243	32.8303	44.3646	37.5224
Ma10_t05740.2	Ma10_g05740	sp|P59234|YIPL_SOLTU Protein yippee-like OS=Solanum tuberosum PE=2 SV=1//1.04388e-68	mRNA	3.29959	5.30099	0.000868384	2.10426	3.72484	2.81366	4.01454	11.8726	5.13472	3.61656	1.30196	6.48876	4.27708	3.80039	2.08213	10.43	4.47608	3.1009	2.23358	1.15629	4.28764	1.99342	9.43389	5.82871
Ma10_t05740.1	Ma10_g05740	sp|P59234|YIPL_SOLTU Protein yippee-like OS=Solanum tuberosum PE=2 SV=1//1.04388e-68	mRNA	8.66005	6.18077	6.65229	5.9365	7.80964	10.1808	3.84517	7.36233	8.19998	4.11493	5.89801	4.97048	5.80027	6.43629	8.48712	4.38148	10.3705	2.91918	2.11446	4.27906	1.62806	8.21506	8.69125	5.49129
Ma10_t24570.1	Ma10_g24570	sp|Q9ZPE7|EXO_ARATH Protein EXORDIUM OS=Arabidopsis thaliana GN=EXO PE=2 SV=1//6.01813e-115	mRNA	6.48506	3.46617	3.1692	6.14087	5.33463	4.96123	3.4559	6.33732	6.48162	6.01249	2.97314	3.74885	13.2971	9.74972	8.05077	4.4023	4.45672	7.44984	5.27348	5.97479	4.5948	2.06581	5.73942	3.54952
Ma06_t21840.1	Ma06_g21840	-//-	mRNA	3.79329	2.58951	1.82797	1.93413	2.21694	2.372	1.90923	3.28138	2.89274	2.24456	2.7354	1.2388	3.35416	2.63451	3.00962	3.69287	4.72017	1.96914	2.27762	2.22824	1.92257	1.80183	2.88976	2.67802
Ma04_t34020.1	Ma04_g34020	sp|P91924|ARF_DUGJA ADP-ribosylation factor OS=Dugesia japonica PE=2 SV=3//4.67448e-81	mRNA	39.9948	62.8671	55.5415	42.2281	38.9734	47.1073	35.2136	48.5648	51.4003	37.1224	39.3371	51.6407	45.7372	55.5771	60.0711	47.0964	43.912	32.9066	38.1439	37.7999	43.0781	51.0733	60.7618	70.8286
Ma06_t05970.1	Ma06_g05970	sp|Q681K7|GEX1_ARATH Protein GAMETE EXPRESSED 1 OS=Arabidopsis thaliana GN=GEX1 PE=1 SV=1//5.09356e-157	mRNA	0	0.0562059	0	0.050817	0	0	0	0.0503499	0.0221824	0.0602259	0	0.19694	0.102777	0.0273432	0.0225689	0.0382556	0	0	0.108997	0.23614	0.143572	0.0506335	0.0426429	0.0785508
Ma08_t11400.1	Ma08_g11400	-//-	mRNA	8.25605	7.61873	11.8764	9.81347	13.4715	13.9581	7.44999	12.4597	8.94058	6.91964	8.67577	8.68595	10.8531	12.6763	15.19	11.9864	16.2459	10.3127	9.25661	9.16517	9.25673	7.94964	17.6281	10.2888
Ma01_t00120.1	Ma01_g00120	-//-	mRNA	4.72501	4.86125	4.80917	4.35587	5.50985	4.7486	4.43736	11.9195	3.42351	6.56313	4.64659	3.52923	3.86401	5.58433	5.04736	4.70419	3.89476	5.14373	4.19995	3.61954	3.74806	3.72162	5.91483	3.73083
Ma11_t18370.1	Ma11_g18370	sp|Q2QY53|CIPKW_ORYSJ CBL-interacting protein kinase 32 OS=Oryza sativa subsp. japonica GN=CIPK32 PE=2 SV=2//0	mRNA	19.59	25.6691	13.2614	16.8757	26.4124	29.516	18.8697	45.743	17.1503	19.6203	30.9383	25.642	23.8443	23.1117	23.6484	36.1827	37.8461	25.416	20.9051	19.9029	11.9761	19.5351	34.8378	26.7427
Ma07_t26830.1	Ma07_g26830	sp|Q0JKI9|ARFB_ORYSJ Auxin response factor 2 OS=Oryza sativa subsp. japonica GN=ARF2 PE=2 SV=1//1.78603e-169	mRNA	6.07815	10.8507	6.79429	9.16199	8.96147	7.3301	7.68026	7.3795	7.94976	7.93719	10.5527	11.1858	5.73158	7.95195	7.7592	7.81177	8.03727	13.0972	6.37298	7.56163	11.3801	9.98196	7.0171	8.04708
Ma02_t22970.1	Ma02_g22970	sp|C8V4D4|GRRA_EMENI SCF E3 ubiquitin ligase complex F-box protein grrA OS=Emericella nidulans (strain FGSC A4 / ATCC 38163 / CBS 112.46 / NRRL 194 / M139) GN=grrA PE=2 SV=1//1.15158e-06	mRNA	1.03854	1.10138	0.752438	0.583116	0.18378	0.63105	0.611685	1.31059	0.376456	0.598633	0.595556	0.200827	0.880122	0.831566	0.256178	1.4434	1.55405	0.560576	1.49927	0.372021	0.205233	0.37658	1.29941	7.43583e-06
Ma02_t22970.2	Ma02_g22970	sp|C8V4D4|GRRA_EMENI SCF E3 ubiquitin ligase complex F-box protein grrA OS=Emericella nidulans (strain FGSC A4 / ATCC 38163 / CBS 112.46 / NRRL 194 / M139) GN=grrA PE=2 SV=1//1.15158e-06	mRNA	0.322935	0.00309612	0.468787	0.806643	1.62038	0.627007	0.721486	2.27424	0.57965	1.00927	0.53852	1.17155	0.514953	0.539845	0.749495	0.885616	1.36849	1.21156	0.0527944	1.67606	1.06903	0.834323	0.996381	1.15997
Ma05_t11840.1	Ma05_g11840	sp|Q8VZQ6|GCL2_ARATH LanC-like protein GCL2 OS=Arabidopsis thaliana GN=GCL2 PE=2 SV=1//0	mRNA	6.78145	10.4865	9.56136	11.7524	10.5789	9.83117	9.68534	4.12427	7.09893	8.01344	9.43334	8.57946	7.02866	8.58208	8.42837	8.53299	5.97096	11.9194	9.74617	8.43294	9.37088	8.89054	5.37511	9.60135
Ma00_t00880.1	Ma00_g00880	sp|Q6YXY2|HACL1_ORYSJ Probable histone acetyltransferase HAC-like 1 OS=Oryza sativa subsp. japonica GN=Os02g0137500 PE=3 SV=2//7.94697e-17	mRNA	0	0	0	0	0	0	0	0	0	0	0	0	0	0	0	0	0	0	0	0	0	0	0	0
Ma01_t04520.1	Ma01_g04520	sp|Q9LMN8|WAK3_ARATH Wall-associated receptor kinase 3 OS=Arabidopsis thaliana GN=WAK3 PE=2 SV=2//1.50779e-167	mRNA	1.84806	0.795467	1.12094	0.0837235	0.0388027	0	1.1079	5.21759	0.571629	2.64791	1.01713	0.204469	1.34429	1.02546	1.43599	0.732991	0.104651	0.307462	0.0720849	0.0668756	0.0190096	0.267989	1.29708	0.706522
Ma04_t18850.1	Ma04_g18850	sp|P0C587|HEM1_ORYSJ Glutamyl-tRNA reductase, chloroplastic OS=Oryza sativa subsp. japonica GN=Os10g0502400 PE=2 SV=1//0	mRNA	0.366117	0.351969	0.394947	0.30085	0.205064	0.278518	0.524728	0.351172	0.309726	0.609985	0.351412	0.746315	0.233667	0.228206	0.219156	0.213645	0.24325	0.0866189	0.304621	0.659475	0.602421	0.495442	0.387271	0.528236
Ma01_t22920.1	Ma01_g22920	sp|Q9LFQ4|PP383_ARATH Pentatricopeptide repeat-containing protein At5g15010, mitochondrial OS=Arabidopsis thaliana GN=At5g15010 PE=2 SV=2//0	mRNA	3.47038	3.82344	5.12965	3.52449	3.11513	3.3674	4.66589	2.27123	4.02344	3.99933	4.06415	3.90645	3.37008	2.98498	3.47644	2.72231	2.2263	3.68614	3.46961	2.83987	3.99012	3.03349	1.81389	3.72084
Ma08_t25350.1	Ma08_g25350	-//-	mRNA	1.31371	1.46769	0.958848	2.67911	2.06115	2.3426	1.56671	2.38174	1.28984	1.63231	1.37388	1.99638	1.39289	1.75129	1.84556	3.43092	3.55789	3.57379	1.71881	2.55999	2.71695	2.27064	2.77383	2.50267
Ma05_t20500.1	Ma05_g20500	sp|Q8GT41|PLA1_PLAAC Putative invertase inhibitor OS=Platanus acerifolia PE=1 SV=1//2.97719e-13	mRNA	0	0	0	0	0	0	0	0	0	0	0	0.115975	0	0	0	0	0	0	0	0	0	0	0	0
Ma10_t12650.1	Ma10_g12650	sp|A2BIJ3|BSDC1_DANRE BSD domain-containing protein 1 OS=Danio rerio GN=bsdc1 PE=1 SV=1//2.84409e-15	mRNA	18.0514	16.8042	13.8723	13.7591	19.9405	21.7967	13.1208	16.6749	15.7528	15.3132	15.7458	16.8825	21.179	16.9883	20.3031	26.3099	21.44	14.4926	20.9187	21.8862	14.9392	17.3885	18.071	20.6285
Ma06_t01870.1	Ma06_g01870	sp|P42774|GBF1_ARATH G-box-binding factor 1 OS=Arabidopsis thaliana GN=GBF1 PE=2 SV=2//2.72618e-38	mRNA	11.6161	6.08513	8.23268	6.9651	6.82993	6.12552	5.40782	6.70051	6.82373	4.74083	6.29291	4.90922	7.40059	9.03933	10.1686	5.64307	6.63725	5.46531	5.459	5.34049	5.40107	5.0572	8.32509	5.24576
Ma02_t14340.1	Ma02_g14340	sp|Q8RX77|PTR21_ARATH Protein NRT1/ PTR FAMILY 2.13 OS=Arabidopsis thaliana GN=NPF2.13 PE=1 SV=1//0	mRNA	0.0370515	0	0.114385	0	0.0748176	0.0260974	0	0	0.282094	0.127683	0.075376	0.333918	0	0.0231374	0.0381425	0.032432	0.161105	0.157717	0.462226	0.200207	1.43754	0.0644272	0	0.110794
Ma06_t27460.1	Ma06_g27460	sp|Q9LT79|PUB25_ARATH U-box domain-containing protein 25 OS=Arabidopsis thaliana GN=PUB25 PE=2 SV=1//1.83062e-68	mRNA	3.93145	3.12051	6.29315	4.4263	3.72757	3.4719	6.4732	1.7407	5.91997	2.7616	2.72437	5.19582	3.69938	2.71041	3.59109	0.227902	1.92384	2.21429	3.59102	3.77783	4.61347	4.58148	1.52353	4.00204
Ma07_t18290.1	Ma07_g18290	-//-	mRNA	3.779	10.1742	11.6323	8.12267	10.5811	11.7411	6.67962	6.01564	5.52857	7.15147	7.44854	10.174	5.54985	6.04981	4.32238	9.88106	7.88397	8.46048	7.31812	6.51216	6.27433	5.88458	6.5887	7.27908
Ma06_t10680.1	Ma06_g10680	sp|Q9LK94|MDAR2_ARATH Probable monodehydroascorbate reductase, cytoplasmic isoform 2 OS=Arabidopsis thaliana GN=At3g27820 PE=2 SV=1//0	mRNA	16.3523	22.1669	21.5515	17.6298	21.0551	22.3799	15.3357	25.1784	19.8055	18.2407	16.8898	18.1908	18.3051	18.8378	18.8002	21.6067	19.3619	16.3279	16.6882	16.8723	14.0377	16.3241	20.5595	19.5326
Ma05_t24620.1	Ma05_g24620	-//-	mRNA	0.278455	0	0	0.246909	0	0	0.0919193	0	0.847616	0.38209	0.0957073	0	0.161275	0.268564	0.301709	0.12188	0	0	0.460127	0	0.632251	0.159931	0.135143	0.342292
Ma11_t00290.1	Ma11_g00290	sp|Q9FIX3|PP407_ARATH Pentatricopeptide repeat-containing protein At5g39710 OS=Arabidopsis thaliana GN=EMB2745 PE=2 SV=1//4.34767e-43	mRNA	0.789902	0.598058	0.869211	1.19168	1.19898	1.19158	0.948935	0.502114	1.03406	0.831552	1.06899	1.00356	0.821768	1.20169	0.965978	0.891551	0.51238	1.03345	0.761476	0.866618	0.849351	0.953218	0.60922	0.544657
Ma11_t13400.1	Ma11_g13400	sp|Q9AYP4|RS10_ORYSJ 40S ribosomal protein S10 OS=Oryza sativa subsp. japonica GN=RPS10 PE=2 SV=2//2.24578e-52	mRNA	19.2199	15.4548	16.1624	13.2395	11.6771	12.7184	28.9724	8.66471	17.6755	19.4936	27.8319	17.8456	14.6659	13.8928	15.3236	8.55087	7.9017	17.5213	16.0528	14.8031	18.7317	15.85	8.91296	15.568
Ma11_t13400.2	Ma11_g13400	sp|Q9AYP4|RS10_ORYSJ 40S ribosomal protein S10 OS=Oryza sativa subsp. japonica GN=RPS10 PE=2 SV=2//2.24578e-52	mRNA	0.358179	2.69549	4.69269e-05	1.46855	0.403848	3.30203e-05	0.471016	3.43783e-05	0.751423	0.888251	0.497175	1.11081	0.445509	3.76161e-05	1.49867	0.975833	1.06767	0.465814	5.74798e-05	2.21465	1.40733	1.48333	2.9797	1.13059
Ma05_t19900.1	Ma05_g19900	-//-	mRNA	0.874285	1.73076	0.739883	1.72472	2.41159	1.51334	1.0581	0.845237	2.58731	3.79787	1.5038	3.37748	1.60187	1.59577	1.10887	0.765351	1.6851	1.23142	2.16613	3.03369	9.91712	3.01114	1.2725	4.48588
Ma09_t04990.3	Ma09_g04990	sp|Q8LPN7|RNG1L_ARATH E3 ubiquitin-protein ligase RING1-like OS=Arabidopsis thaliana GN=At3g19950 PE=1 SV=1//9.93268e-26	mRNA	21.1836	15.6101	25.3228	8.93041	14.5829	12.1554	15.821	38.0076	14.9909	21.3398	15.3788	7.79464	10.319	13.4643	14.5499	10.598	11.6078	11.3539	8.00585	7.96035	5.32084	7.26416	26.6287	8.65445
Ma09_t04990.2	Ma09_g04990	sp|Q8LPN7|RNG1L_ARATH E3 ubiquitin-protein ligase RING1-like OS=Arabidopsis thaliana GN=At3g19950 PE=1 SV=1//9.93268e-26	mRNA	7.47169	12.6227	5.98744	14.3276	17.139	14.48	7.84537	13.3027	5.29066	11.0513	7.40431	8.82748	6.15672	5.06396	3.01058	21.9422	21.951	10.9677	17.3414	19.4566	11.1612	8.70387	7.31141	14.257
Ma09_t04990.1	Ma09_g04990	sp|Q8LPN7|RNG1L_ARATH E3 ubiquitin-protein ligase RING1-like OS=Arabidopsis thaliana GN=At3g19950 PE=1 SV=1//9.93268e-26	mRNA	2.87639	4.28348	4.08519	1.35404	1.66979	1.37676	3.24076	5.67109	2.12788	4.24907	2.91813	1.48556	1.29908	1.30714	1.073	2.20245	2.72728	3.26663	2.11819	0.92836	1.6801	0.863742	5.19949	1.98989
Ma05_t16740.1	Ma05_g16740	sp|Q9LEL6|6OMT_COPJA (RS)-norcoclaurine 6-O-methyltransferase OS=Coptis japonica PE=1 SV=1//1.41619e-08	mRNA	0	0	0	0	0	0	0	0	0	0	0	0	0	0	0	0	0	0	0	0	0	0	0	0
Ma03_t01860.1	Ma03_g01860	-//-	mRNA	121.298	56.0733	130.063	165.836	0	0	62.91	0	62.101	0	45.1898	19.526	35.5639	135.615	0	32.5335	82.7561	0	24.1282	0	31.6704	45.2658	0	28.558
Ma02_t07130.1	Ma02_g07130	-//-	mRNA	23.1979	17.9852	18.6727	22.7359	24.4618	29.6849	29.4028	11.7442	25.6137	25.7292	30.2266	27.3699	37.9462	26.0747	36.1564	33.9897	25.7909	38.4028	39.4205	41.7827	35.1265	29.6111	20.1445	29.5445
Ma04_t17180.1	Ma04_g17180	sp|Q9ZVH8|RDO2_ARATH Transcription elongation factor TFIIS OS=Arabidopsis thaliana GN=TFIIS PE=1 SV=1//5.2733e-115	mRNA	19.6953	13.3281	13.8677	11.6079	16.4298	15.1196	12.5067	30.5763	14.2038	16.8872	14.9333	11.2729	19.373	16.6798	16.5208	15.8851	18.895	14.8848	16.6741	16.5934	11.2566	12.2086	27.3896	13.4842
Ma03_t11900.1	Ma03_g11900	sp|Q9SGH2|MBD9_ARATH Methyl-CpG-binding domain-containing protein 9 OS=Arabidopsis thaliana GN=MBD9 PE=2 SV=1//9.93782e-14	mRNA	31.3518	16.4374	22.6049	19.7582	26.6602	28.9808	17.6697	49.0632	16.5076	18.6483	17.3816	18.6518	20.7746	26.702	22.5508	29.2479	36.4281	21.5706	20.5574	20.0624	15.9295	19.059	37.5509	16.306
Ma06_t24550.1	Ma06_g24550	sp|O48522|VQ17_ARATH VQ motif-containing protein 17 OS=Arabidopsis thaliana GN=VQ17 PE=2 SV=1//3.93924e-15	mRNA	0	0	0	0	0	0	0	0	0	0	0	0	0	0	0	0	0	0	0	0	0	0	0	0
Ma06_t33340.1	Ma06_g33340	sp|Q9M069|E137_ARATH Glucan endo-1,3-beta-glucosidase 7 OS=Arabidopsis thaliana GN=At4g34480 PE=1 SV=2//0	mRNA	14.888	18.5015	18.1168	12.7815	14.2752	11.4055	19.2349	5.44679	15.9788	13.0674	16.0589	20.2873	12.4515	13.6762	14.4867	6.60723	6.1764	10.1937	10.4453	12.9158	13.7976	16.6976	6.75739	16.6951
Ma03_t18530.1	Ma03_g18530	sp|D5JWB3|SARED_ESCCA Sanguinarine reductase OS=Eschscholzia californica GN=SARED1 PE=1 SV=1//3.8009e-14	mRNA	4.23413	4.29551	4.41504	3.91521	4.14714	3.85859	3.83261	4.65963	3.60344	3.4975	3.6357	4.40318	3.54958	3.52622	4.24944	3.47823	2.59459	4.24356	3.6232	3.51886	3.11534	3.42721	3.42814	4.08184
Ma08_t30800.1	Ma08_g30800	-//-	mRNA	5.57066	18.9661	5.11424	18.0539	6.70846	5.29445	5.45572	6.05809	9.30875	11.6912	8.10632	11.5026	7.21973	8.60302	7.22302	4.96818	13.7815	7.29995	11.4399	11.6004	34.2461	8.82137	5.38148	13.8543
Ma06_t26920.1	Ma06_g26920	sp|Q9SG92|MES17_ARATH Methylesterase 17 OS=Arabidopsis thaliana GN=MES17 PE=1 SV=1//1.24531e-89	mRNA	2.98917	5.40087	2.8243	10.0688	5.87504	6.73784	3.47053	28.6458	2.54185	11.6702	4.73887	7.80152	3.44705	2.09425	2.46449	2.26299	2.9827	1.94294	8.71005	8.16594	5.86273	3.77811	12.3508	5.42569
Ma04_t34590.1	Ma04_g34590	sp|Q42290|MPPB_ARATH Probable mitochondrial-processing peptidase subunit beta OS=Arabidopsis thaliana GN=At3g02090 PE=2 SV=2//0	mRNA	11.2475	9.04845	8.10185	5.47102	7.86204	5.67933	11.1714	12.7294	8.7312	9.17288	11.008	6.3886	7.94562	8.48635	9.16313	7.29022	6.85327	7.8681	5.37243	5.94827	6.11518	6.38284	13.3701	6.79981
Ma10_t25630.1	Ma10_g25630	sp|Q10QP3|HOX13_ORYSJ Homeobox-leucine zipper protein HOX13 OS=Oryza sativa subsp. japonica GN=HOX13 PE=2 SV=1//7.81818e-50	mRNA	0	0	0	0	0	0	0	0	0	0	0	0	0	0	0	0	0	0	0	0	0	0	0	0
Ma04_t16310.3	Ma04_g16310	sp|Q9CSU0|RPR1B_MOUSE Regulation of nuclear pre-mRNA domain-containing protein 1B OS=Mus musculus GN=Rprd1b PE=1 SV=2//1.53427e-24	mRNA	1.42228	0.334386	0.654151	1.63719	0.6824	1.98595e-05	0.213135	0.202457	7.07646e-08	0.647769	1.36921	2.25151e-05	2.24903	1.20839	1.34235	1.53719	0.898673	0.455107	0.711306	1.07238	0.634338	0.314442	1.15233	0.801396
Ma02_t06070.1	Ma02_g06070	sp|Q8GWQ2|AHL20_ARATH AT-hook motif nuclear-localized protein 20 OS=Arabidopsis thaliana GN=AHL20 PE=2 SV=1//3.88395e-47	mRNA	17.5349	20.601	19.0452	9.01954	9.65617	6.68695	16.8179	12.0225	18.2531	7.59613	6.51203	6.13965	12.7208	11.9229	9.72472	16.5228	16.1942	9.64776	9.8244	7.66791	6.2938	8.68529	12.8881	11.8334
Ma04_t07440.1	Ma04_g07440	-//-	mRNA	0.628221	3.1182	1.1997	2.60775	5.42907	5.74083	1.34753	1.09407	1.27476	3.12239	2.70553	3.33705	1.99564	1.52263	1.03046	11.6865	8.85181	5.74706	5.31412	6.05453	3.35438	3.06211	3.046	4.26798
Ma01_t10650.1	Ma01_g10650	sp|Q24746|NEUR_DROVI Protein neuralized OS=Drosophila virilis GN=neur PE=3 SV=1//1.09018e-09	mRNA	7.68997	5.7182	8.12955	8.3462	8.41173	8.39342	6.43448	8.86893	6.63803	5.87124	5.99637	6.11487	6.10269	7.55326	7.37019	8.56684	6.51419	7.00976	8.74771	7.84197	6.17927	6.14674	7.83405	6.4646
Ma09_t17910.1	Ma09_g17910	-//-	mRNA	0	0	0	0	0	0	0	0	0	0	0	0	0	0	0	0	0	0	0	0	0	0	0	0
Ma05_t29990.1	Ma05_g29990	sp|Q9FF80|SUVH1_ARATH Histone-lysine N-methyltransferase, H3 lysine-9 specific SUVH1 OS=Arabidopsis thaliana GN=SUVH1 PE=2 SV=1//0	mRNA	1.77992	1.09424	0.203453	1.50384	1.96562	1.23267	1.22556	1.95784	0.605488	2.29322	1.2293	2.58224	4.03115	0.807373	2.9408	2.49791	1.85734	2.03277	1.17822	2.08667	1.60156	1.47759	1.17783	2.35555
Ma04_t07960.1	Ma04_g07960	sp|Q9LXR7|PAR2_ARATH Transcription factor PAR2 OS=Arabidopsis thaliana GN=PAR2 PE=3 SV=1//3.14471e-09	mRNA	0.444743	0.598708	0	0.400219	1.09225	0.171385	0.439761	0	0.4511	0.912044	0.772921	1.28866	0.381423	0.146509	0.75502	0.778734	0.962584	0.1558	0.548248	0.856718	2.28318	0.887485	0.859526	0.699141
Ma09_t21800.1	Ma09_g21800	sp|Q8EU05|CLPB_OCEIH Chaperone protein ClpB OS=Oceanobacillus iheyensis (strain DSM 14371 / JCM 11309 / KCTC 3954 / HTE831) GN=clpB PE=3 SV=1//2.48747e-12	mRNA	0	0	0	0	0	0	0	0	0	0	0	0	0	0	0	0	0	0	0	0	0	0	0	0
Ma10_t15930.1	Ma10_g15930	-//-	mRNA	0.326343	0.271204	0.3557	0.423705	0.361899	0.351771	0.457077	0.795871	0.623589	0.185218	0.364557	0.173005	0.361452	1.19922	1.42379	0.268851	0.333867	0.381298	0.159641	0.296363	0.504856	0.801026	0.449659	0.36751
Ma01_t20340.1	Ma01_g20340	sp|P19172|CHIA_ARATH Acidic endochitinase OS=Arabidopsis thaliana GN=CHIB1 PE=2 SV=2//9.29259e-83	mRNA	85.5778	6.4838	43.4388	261.46	151.434	193.62	1.82704	1.1164	2.48975	15.836	0.705843	2.6245	20.6757	46.1987	49.8617	16.6332	13.1593	26.6586	247.803	179.267	36.9197	1.83704	9.35838	3.25079
Ma10_t26770.2	Ma10_g26770	sp|Q8VXY7|ENT1_ARATH Equilibrative nucleotide transporter 1 OS=Arabidopsis thaliana GN=ENT1 PE=1 SV=1//8.59695e-170	mRNA	0.894725	2.20386	1.66746	5.61493	3.522	3.55728	1.82312	1.11163	1.35396	3.19904	2.0661	4.89022	1.99069	1.73232	1.89472	3.84678	3.9462	2.99277	3.80408	3.42688	4.1452	3.47183	1.67785	2.75825
Ma02_t15090.1	Ma02_g15090	sp|Q9SYY4|ELO3L_ARATH Elongation of fatty acids protein 3-like OS=Arabidopsis thaliana GN=HOS3 PE=2 SV=1//8.09411e-72	mRNA	0.278799	0.0516864	0.59656	0.1398	0.270621	0.0572405	0	0.275984	0.202118	0.109593	0.162969	0	0.279401	0.453128	0.460595	0.418367	0.115333	0.0563491	0	0.061463	0.0520854	0.0459946	0.38785	0.0963616
Ma00_t01420.1	Ma00_g01420	sp|Q9LIK9|APS1_ARATH ATP sulfurylase 1, chloroplastic OS=Arabidopsis thaliana GN=APS1 PE=1 SV=1//0	mRNA	95.5559	96.6187	92.0521	32.9958	70.0603	34.0288	120.15	133.941	104.839	88.124	95.1178	43.7047	63.1562	83.2798	76.3008	32.8183	39.7098	65.7779	34.6126	33.2269	34.0483	33.7496	123.61	35.3756
Ma02_t16920.1	Ma02_g16920	sp|P17407|21KD_DAUCA 21 kDa protein OS=Daucus carota PE=2 SV=1//1.27664e-23	mRNA	0.754465	2.64108	0.47261	1.88062	2.63584	2.79797	1.99401	0.763173	1.10068	2.07466	1.41769	4.18936	0.605059	0.119717	0.0499388	3.38471	1.70622	0.133294	2.26619	2.47375	0.430819	0.380683	3.11999	0.916267
Ma10_t20500.2	Ma10_g20500	sp|Q6Z2G9|TLP5_ORYSJ Tubby-like F-box protein 5 OS=Oryza sativa subsp. japonica GN=TULP5 PE=2 SV=1//0	mRNA	1.5156	3.45221	2.31384	5.87458	2.90699	4.73288	4.17887	1.44313	3.09882	4.37623	2.62889	5.64074	5.15756	2.11575	2.70039	1.6749	2.81925	1.89466	4.53028	5.86287	4.89948	5.03834	1.30461	6.60298
Ma00_t02040.1	Ma00_g02040	-//-	mRNA	0	0	0	0	0	0	0	0	0	0	0	0	0	0	0	0	0	0	0	0	0	0	0	0
Ma01_t19260.1	Ma01_g19260	-//-	mRNA	5.96309	2.59294	3.24633	3.67765	8.00317	25.9058	3.54205	11.9715	2.7525	4.33031	1.65978	1.37257	2.80255	2.57851	3.38417	5.66511	6.05721	5.65587	1.68286	5.7053	0.627924	6.91945	15.2188	4.69296
Ma03_t21790.1	Ma03_g21790	sp|Q5NDE3|PMGT2_TETNG Protein O-linked-mannose beta-1,4-N-acetylglucosaminyltransferase 2 OS=Tetraodon nigroviridis GN=pomgnt2 PE=2 SV=1//4.51457e-08	mRNA	8.32799	11.5831	9.77007	11.7086	11.0942	10.7249	11.1691	9.94541	9.16377	11.7789	9.06036	17.8269	10.3368	10.8025	10.9059	10.51	7.0701	6.31663	11.9852	12.7922	11.5287	13.45	10.6669	17.2057
Ma07_t24440.1	Ma07_g24440	sp|P0DH79|Y5064_ARATH CBS domain-containing protein CBSCBSPB5 OS=Arabidopsis thaliana GN=CBSCBSPB5 PE=1 SV=1//0	mRNA	1.51876	1.90753	1.3019	0.62126	0.195532	0.199815	3.39423	6.37575	1.85083	2.0638	1.98638	0.996101	0.929085	2.66559	2.77176	2.32692	1.28669	0.838695	0.578746	2.60831	0.501644	0.574736	4.41915	1.19454
Ma09_t17300.2	Ma09_g17300	sp|Q9FGI1|LTN1_ARATH E3 ubiquitin-protein ligase listerin OS=Arabidopsis thaliana GN=At5g58410 PE=3 SV=1//0	mRNA	5.6437	5.07661	4.77716	5.8795	3.9387	4.82025	7.43802	9.07698	5.56036	4.80395	6.62383	5.211	6.232	4.33073	4.6537	7.0429	6.04349	6.12733	2.63472	4.50941	4.11414	5.5825	6.87417	4.89088
Ma09_t17300.3	Ma09_g17300	sp|Q9FGI1|LTN1_ARATH E3 ubiquitin-protein ligase listerin OS=Arabidopsis thaliana GN=At5g58410 PE=3 SV=1//0	mRNA	1.31941	0.745558	0.775216	0.414013	0.793019	0.721934	0.41158	0.512657	0.360586	0.431829	0.21776	0.641354	0.551677	2.26144	1.34391	0.656862	0.620272	0.752702	0.315993	0.513598	0.381833	0.811413	0.158096	0.395997
Ma09_t17300.1	Ma09_g17300	sp|Q9FGI1|LTN1_ARATH E3 ubiquitin-protein ligase listerin OS=Arabidopsis thaliana GN=At5g58410 PE=3 SV=1//0	mRNA	7.43036	8.33656	9.11431	7.12983	9.07447	9.62411	6.77189	12.6564	8.67426	8.35626	8.02316	7.4595	6.46035	10.897	9.4079	9.38874	11.7874	8.84257	7.28268	6.55545	7.30902	6.93279	10.7433	6.12417
Ma06_t32390.1	Ma06_g32390	sp|A6YIH8|C7D55_HYOMU Premnaspirodiene oxygenase OS=Hyoscyamus muticus GN=CYP71D55 PE=1 SV=1//4.50519e-153	mRNA	0.752438	1.82175	0.301156	3.11389	4.65493	6.53758	0.790318	0.866882	1.10078	2.1042	1.56223	1.51011	2.9662	1.35709	1.02882	7.78731	5.48395	0.533555	11.075	9.05339	0.988651	1.487	1.77057	4.32292
Ma08_t00030.1	Ma08_g00030	-//-	mRNA	0	0	0	0	0	0	0	0	0	0	0	0	0	0	0	0	0	0	0	0	0	0	0	0
Ma08_t00770.1	Ma08_g00770	sp|Q8GWQ6|Y6344_ARATH UPF0235 protein At5g63440 OS=Arabidopsis thaliana GN=At5g63440 PE=1 SV=1//1.62764e-155	mRNA	16.0058	18.2415	19.3602	16.075	13.2302	15.3537	19.6427	24.1863	14.8163	18.0821	21.1944	20.8352	10.9877	14.9879	15.9222	15.5505	14.5129	17.9068	14.1428	12.0098	16.8876	14.1063	21.4004	14.5007
Ma11_t22130.1	Ma11_g22130	sp|Q9FLE8|Y5986_ARATH Uncharacterized protein At5g39865 OS=Arabidopsis thaliana GN=At5g39865 PE=2 SV=1//1.82836e-11	mRNA	0.184124	0.290318	0.139615	0.111215	0.24739	0.178601	0.255485	0.228198	0.0978156	0.155112	0.115121	0.333682	0.0950995	0.219486	0.212035	0.084877	2.7842e-08	0.274999	0.0942886	0.0998159	0.168744	0.175263	0.282444	0.0773942
Ma06_t13450.2	Ma06_g13450	-//-	mRNA	0.957988	0.460448	0.632766	1.71719	1.10152	1.99104	0.435765	0.466534	1.05475	0.838657	1.17239	0.947604	0.998836	1.47489	2.03587	1.23587	0.288819	1.28222	1.01678	0.0077334	1.11962	1.73194	0.980889	1.96298
Ma06_t13450.1	Ma06_g13450	-//-	mRNA	4.25419e-05	5.68694e-05	2.01229e-07	2.51025e-05	8.96286e-06	0.250314	0.509494	4.95049e-06	0.202954	0.369715	5.6688e-05	0.375826	4.9365e-05	5.07338e-05	4.09534e-05	9.57474e-06	0.66243	2.45903e-05	0.440165	2.03232	0.593469	0.536281	1.87773e-05	2.83932e-05
Ma02_t05340.1	Ma02_g05340	sp|B8BDV1|LONP2_ORYSI Lon protease homolog 2, peroxisomal OS=Oryza sativa subsp. indica GN=LON1 PE=2 SV=1//0	mRNA	7.20765	9.53061	9.37056	13.7919	14.5066	17.414	5.67539	8.31681	6.9357	7.74615	7.00276	9.15126	10.4342	11.81	10.6199	18.3655	19.7308	14.0057	12.9024	13.075	9.80438	8.84137	14.4273	10.3653
Ma04_t18180.1	Ma04_g18180	sp|Q9ZSS6|THD1_ARATH Threonine dehydratase biosynthetic, chloroplastic OS=Arabidopsis thaliana GN=OMR1 PE=1 SV=1//6.08376e-16	mRNA	0	0	0	0	0	0	0	0	0	0	0	0	0	0	0	0	0	0	0	0	0	0	0	0
Ma00_t05430.1	Ma00_g05430	-//-	mRNA	0	0	0	0	0	0	0	0	0	0	0	0	0	0	0	0	0	0	0	0	0	0	0	0
Ma02_t00710.2	Ma02_g00710	sp|P53665|ACPM1_ARATH Acyl carrier protein 1, mitochondrial OS=Arabidopsis thaliana GN=MTACP1 PE=2 SV=1//2.76314e-43	mRNA	86.6836	96.2089	102.158	67.8266	65.035	56.3258	102.847	87.5252	87.7343	84.5848	99.4792	80.45	62.5506	75.3175	76.5611	66.1979	57.7727	78.7713	70.204	68.2557	83.6286	72.9248	93.5273	88.4989
Ma10_t21020.1	Ma10_g21020	sp|P40973|PLY_LILLO Pectate lyase OS=Lilium longiflorum PE=2 SV=1//0	mRNA	0	0	0	0	0	0	0	0	0	0	0	0	0	0	0	0	0	0	0	0	0.0356166	0	0	0
Ma10_t15460.3	Ma10_g15460	sp|A4VCH4|CP062_DANRE UPF0505 protein C16orf62 homolog OS=Danio rerio GN=zgc:163107 PE=2 SV=1//2.49712e-97	mRNA	1.01325	1.0113	0.670493	1.63885	1.96218	0.679467	0.613203	2.03492	0.972199	1.34659	0.70428	1.29086	1.16511	0.833774	0.945884	1.3816	1.31169	0.734463	1.11429	0.374212	0.975382	0.675333	2.593	0.747553
Ma10_t15460.2	Ma10_g15460	sp|A4VCH4|CP062_DANRE UPF0505 protein C16orf62 homolog OS=Danio rerio GN=zgc:163107 PE=2 SV=1//2.49712e-97	mRNA	0.00465018	0.182986	6.04824e-05	0.550285	0.230682	0.477384	0.000247844	2.68793e-05	0.9059	0.321049	7.25006e-05	2.55296e-05	0.000676891	0.000221994	0.000524732	0.686331	1.22868	4.62098e-05	0.00023644	5.20805e-05	9.06311e-05	0.00010649	7.84176e-05	0.527354
Ma10_t15460.1	Ma10_g15460	sp|A4VCH4|CP062_DANRE UPF0505 protein C16orf62 homolog OS=Danio rerio GN=zgc:163107 PE=2 SV=1//2.49712e-97	mRNA	7.18618	6.15537	6.52194	6.97965	7.84272	9.44035	6.00803	10.7494	5.38605	6.32922	7.11733	7.69725	7.7057	9.18568	8.85972	10.6702	11.5358	10.4507	5.9874	7.26375	7.58673	8.31008	11.949	7.75883
Ma07_t19850.5	Ma07_g19850	sp|F4K5L5|TBL16_ARATH Protein trichome birefringence-like 16 OS=Arabidopsis thaliana GN=TBL16 PE=2 SV=1//1.87064e-174	mRNA	3.4387	2.29748	2.71032	3.12579	4.60534	0.824771	2.16283	2.05448	2.68115	3.10407	2.23054	2.39001	3.44637	3.31439	2.18517	0.000395624	0.939605	0.000270655	0.822778	1.49274	2.13019	2.13384	3.46624	2.34005
Ma07_t19850.2	Ma07_g19850	sp|F4K5L5|TBL16_ARATH Protein trichome birefringence-like 16 OS=Arabidopsis thaliana GN=TBL16 PE=2 SV=1//1.87064e-174	mRNA	8.90299	7.69511	8.57613	5.15278	3.37101	7.92345	6.53601	10.986	8.34241	7.54411	8.19478	7.27661	6.98831	7.0256	9.89374	6.21563	6.04813	7.64787	5.60976	4.65435	6.5933	7.26171	7.87524	6.56157
Ma07_t19850.3	Ma07_g19850	sp|F4K5L5|TBL16_ARATH Protein trichome birefringence-like 16 OS=Arabidopsis thaliana GN=TBL16 PE=2 SV=1//1.87064e-174	mRNA	0.794807	0.469555	0.199713	0.77414	0.643124	0.488381	0.808624	1.0505	1.00999	0.727296	0.147687	0.230104	0.465266	1.20062	1.05741	1.44981e-14	1.20185	0.469992	1.18384	1.22147	0.533042	0.921841	0.580154	0.92209
Ma08_t26320.1	Ma08_g26320	-//-	mRNA	20.0989	0	0	0	0	0	0	26.3121	18.137	0	0	0	0	0	0	0	9.66675	0	0	0	0	0	0	25.607
Ma11_t03490.1	Ma11_g03490	-//-	mRNA	63.5592	69.9411	85.5008	105.438	85.7508	95.8381	55.5194	72.607	71.6507	64.478	57.6679	70.4149	76.9944	88.5381	90.1122	93.1946	92.2657	88.1115	55.3899	58.7408	75.9159	74.6055	77.3764	81.7414
Ma05_t27900.3	Ma05_g27900	sp|Q6WQJ1|DGLA_MOUSE Sn1-specific diacylglycerol lipase alpha OS=Mus musculus GN=Dagla PE=1 SV=2//5.82968e-08	mRNA	0.434538	0.567398	0.670398	0.7239	0.528008	0.735469	0.394238	0.168858	1.38016	0.230989	0.75245	0.541664	0.300957	1.13416	1.23552	0.205056	0.520062	0.492407	0.943311	0.124039	0.69087	1.14689	1.1674	0.617205
Ma05_t27900.2	Ma05_g27900	sp|Q6WQJ1|DGLA_MOUSE Sn1-specific diacylglycerol lipase alpha OS=Mus musculus GN=Dagla PE=1 SV=2//5.82968e-08	mRNA	5.79684	5.75119	5.72961	4.2541	3.1004	3.03003	4.14062	6.40592	2.64156	3.57376	3.70766	4.04544	1.62753	5.82604	5.62489	5.01711	3.49521	4.58605	2.9117	4.09408	3.39075	4.11991	7.62216	3.48361
Ma05_t27900.1	Ma05_g27900	sp|Q6WQJ1|DGLA_MOUSE Sn1-specific diacylglycerol lipase alpha OS=Mus musculus GN=Dagla PE=1 SV=2//5.82968e-08	mRNA	0.368429	0.000551035	0.874324	0.590306	0.723949	0.48528	1.82454	1.32794	2.72601	1.20611	1.24306	9.27849e-05	3.36943	1.8971	1.76671	0.376291	0.584031	0.288082	0.61875	0.232797	0.85396	0.566131	0.660274	1.30667
Ma05_t11690.1	Ma05_g11690	sp|Q9ZU67|PP162_ARATH Pentatricopeptide repeat-containing protein At2g18520, mitochondrial OS=Arabidopsis thaliana GN=At2g18520 PE=2 SV=1//1.14094e-44	mRNA	0.154343	0.816587	0	0.457408	0.106641	0.459931	0.611225	0.179163	0.626381	0.846575	0.31894	0.0993758	0.356727	0.398708	0.505622	0.810678	0.223064	0.543157	0.254793	0.119002	0.799424	0.265584	0.149692	0.190507
Ma05_t03900.1	Ma05_g03900	sp|Q5PNS0|Y3228_ARATH PHD finger protein At3g20280 OS=Arabidopsis thaliana GN=At3g20280 PE=2 SV=1//6.70451e-27	mRNA	3.72773	3.95922	2.80792	3.23924	3.22934	3.4183	2.90946	3.6266	2.69174	4.19354	3.69899	3.81532	4.81445	4.1618	4.3709	3.9046	3.84361	4.07369	5.24262	4.86437	4.57806	3.99796	5.81737	3.78131
Ma04_t33360.1	Ma04_g33360	-//-	mRNA	0	0	0	0	0	0	0	1.24794	0	0	0.777054	0	0	0	0	0	0	0.669142	0	0	0	0	0	0.733516
Ma05_t17090.1	Ma05_g17090	-//-	mRNA	0	0	0	0	0	0	0	0	0	0	0	0	0	0	0	0	0	0	0	0	0	0	0	0
Ma10_t15560.1	Ma10_g15560	sp|Q8S9Z5|DRE1F_ORYSJ Dehydration-responsive element-binding protein 1F OS=Oryza sativa subsp. japonica GN=DREB1F PE=3 SV=1//3.95464e-39	mRNA	0	0.0583576	0	0	0	0	0	0.103676	0	0.123369	0	0	0	0.0568647	0	0	0	0.0634173	0	0	0	0	0	0
Ma04_t15790.1	Ma04_g15790	sp|Q9LFM6|PP375_ARATH Pentatricopeptide repeat-containing protein At5g11310, mitochondrial OS=Arabidopsis thaliana GN=At5g11310 PE=2 SV=1//8.24848e-140	mRNA	2.49995	2.59514	1.39928	2.31309	2.49475	2.00337	2.57691	3.14232	2.05522	2.41079	1.97441	2.27077	2.81906	2.21799	2.40817	5.53103	3.46831	3.09152	2.7053	3.12572	2.50338	2.70401	2.39604	2.27095
Ma04_t09460.1	Ma04_g09460	sp|Q67ZI9|GDL48_ARATH GDSL esterase/lipase At2g42990 OS=Arabidopsis thaliana GN=At2g42990 PE=2 SV=1//9.47906e-140	mRNA	0	0	0	0	0	0	0	0	0	0	0	0	0	0	0	0	0	0	0.0518207	0.0481642	0	0	0	0
Ma08_t11720.1	Ma08_g11720	sp|Q8H273|DRE1E_ORYSJ Dehydration-responsive element-binding protein 1E OS=Oryza sativa subsp. japonica GN=DREB1E PE=2 SV=1//1.25901e-46	mRNA	0.480987	0.852847	0	0.25615	0.654765	0.315377	0.28895	2.02103	0.266267	0.541245	0.597012	0.225203	0.306368	1.10796	1.19989	0.153104	2.78511	0.247323	0.362478	0.674727	0.0571233	0.302764	0.595876	0.0530062
Ma06_t27170.1	Ma06_g27170	sp|Q39013|NAC2_ARATH NAC domain-containing protein 2 OS=Arabidopsis thaliana GN=NAC002 PE=2 SV=2//2.81029e-100	mRNA	29.6893	5.55804	36.1377	5.18713	23.5294	22.051	4.89794	88.4037	3.32254	11.0325	4.06089	1.88539	3.84048	9.8465	9.10594	6.53473	4.78348	3.78366	19.8898	18.0381	1.99602	1.82734	35.1054	1.93366
Ma00_t01190.1	Ma00_g01190	-//-	mRNA	0.241851	0.158582	0.305062	0.427528	0.248777	0.177262	0.71876	0.700256	0.0613546	0.581233	0.497535	0.622842	0.0702372	0.0773425	0.0649015	0.423425	0	0.255911	0.700198	0.83941	0.314554	0.278268	0	0.147914
Ma10_t17520.1	Ma10_g17520	sp|Q67ZE1|HSDD2_ARATH 3beta-hydroxysteroid-dehydrogenase/decarboxylase isoform 2 OS=Arabidopsis thaliana GN=3BETAHSD/D2 PE=2 SV=2//0	mRNA	36.5421	42.826	50.1805	57.6513	54.189	59.0183	46.3949	29.6349	42.0371	53.5617	56.8585	69.5892	59.9312	49.1311	45.3238	46.1935	57.9657	81.2265	70.6652	70.6086	79.1468	66.3444	35.586	60.9538
Ma07_t07580.1	Ma07_g07580	-//-	mRNA	4.59143	5.64833	3.04005	2.75153	4.15139	4.3616	4.66778	11.2315	4.66266	4.08151	2.33116	1.94231	2.65133	2.40814	5.50098	0.889683	2.86009	2.00742	0	0.769169	4.16439	1.63599	1.91255	4.4011
Ma06_t34320.1	Ma06_g34320	-//-	mRNA	0	0	0	0	0	0	0	0	0	0	0	0	0	0	0	0	0	0	0	0	0	0	0	0
Ma08_t03300.1	Ma08_g03300	sp|Q9SJW9|CDT1A_ARATH CDT1-like protein a, chloroplastic OS=Arabidopsis thaliana GN=CDT1A PE=1 SV=1//2.66093e-28	mRNA	0.163875	0.169528	0	0.11476	0.0887998	0.0935808	0.130001	0.22689	0.133068	0.270725	0.044619	0.0843975	0.115215	0.0825304	0.171081	0.0573787	0.0474704	0.324901	0.217665	0.101171	0.300593	0.151588	0.255527	0.197498
Ma10_t26760.1	Ma10_g26760	sp|Q9FHH8|COL5_ARATH Zinc finger protein CONSTANS-LIKE 5 OS=Arabidopsis thaliana GN=COL5 PE=2 SV=2//2.95808e-07	mRNA	0.222008	1.48642	0.276712	0.389247	0.552412	0.689458	0.73371	0.170863	0.525772	0.66196	0.554721	2.00092	0.432998	0.373588	0.232745	0.32389	1.01803	1.04739	0.552597	0.456828	1.98541	3.76213	0.216259	0.670401
Ma02_t04260.1	Ma02_g04260	sp|Q9MA55|ACBP4_ARATH Acyl-CoA-binding domain-containing protein 4 OS=Arabidopsis thaliana GN=ACBP4 PE=1 SV=1//0	mRNA	35.6312	39.9006	44.2699	37.8737	39.0712	41.8506	38.136	70.3516	37.192	45.3879	41.9808	38.9867	29.939	34.078	30.4465	38.9422	36.9251	36.9459	40.4368	34.9572	36.7994	33.9334	48.0606	37.8598
Ma03_t03280.1	Ma03_g03280	sp|Q9AR73|HQGT_RAUSE Hydroquinone glucosyltransferase OS=Rauvolfia serpentina GN=AS PE=1 SV=1//1.10655e-166	mRNA	24.453	32.5486	24.7729	36.0567	25.0478	18.6922	25.3274	19.5258	15.9665	29.9876	34.5895	39.2199	22.2788	16.7142	15.9273	22.7466	24.1759	32.5402	41.0072	45.524	38.5427	26.4626	16.7439	33.3522
Ma08_t33880.1	Ma08_g33880	sp|Q9FZ86|PDCB3_ARATH PLASMODESMATA CALLOSE-BINDING PROTEIN 3 OS=Arabidopsis thaliana GN=PDCB3 PE=1 SV=1//1.30401e-19	mRNA	0.16412	2.29096	0.4612	1.15263	1.05995	1.00359	1.19311	0.284358	2.20706	0.903104	0.2799	1.6377	1.82224	0.726632	0.906936	0.646486	0.77224	0.696478	0.816594	0.379896	1.98467	2.84233	0	2.18532
Ma06_t09950.1	Ma06_g09950	-//-	mRNA	0.834236	0.647453	1.78517	3.15538	7.32517	6.86387	3.0883	1.69417	2.13381	4.73149	5.04333	15.8538	9.38264	3.11006	2.82344	4.55671	1.25658	5.00876	11.1906	11.0215	3.54082	7.71605	0.975544	4.6263
Ma09_t13200.1	Ma09_g13200	sp|Q9FKM5|XRCC3_ARATH DNA repair protein XRCC3 homolog OS=Arabidopsis thaliana GN=XRCC3 PE=1 SV=1//1.26334e-72	mRNA	1.91104	1.27772	0.737372	1.78299	2.54075	1.06562	1.23024	0.906589	0.895121	1.01042	1.67494	1.51425	1.25679	1.12084	1.35177	3.51729	2.2693	2.28493	2.67913	2.87296	1.2785	2.03381	1.33475	1.9062
Ma03_t02600.2	Ma03_g02600	sp|Q9M1Y3|SKI35_ARATH Ankyrin repeat protein SKIP35 OS=Arabidopsis thaliana GN=SKIP35 PE=1 SV=1//0	mRNA	3.96555	6.48541	6.78599	7.38547	6.46631	7.01917	6.05513	3.61551	4.16085	6.37539	6.28972	8.34778	6.72754	8.32543	6.95348	5.32364	2.73034	7.86227	9.43771	9.66238	10.4772	6.66919	4.45532	5.81437
Ma03_t10800.1	Ma03_g10800	sp|A3C039|SAP1_ORYSJ Zinc finger A20 and AN1 domain-containing stress-associated protein 1 OS=Oryza sativa subsp. japonica GN=SAP1 PE=2 SV=2//3.47746e-34	mRNA	162.921	142.55	148.948	68.0282	188.089	78.184	124.053	284.187	94.6052	170.037	173.881	60.7759	99.5293	100.423	81.5864	90.3519	98.931	73.7704	86.1593	98.8368	46.572	61.4845	184.525	62.8759
Ma06_t33850.1	Ma06_g33850	sp|Q9SDN0|DNJ20_ARATH Chaperone protein dnaJ 20, chloroplastic OS=Arabidopsis thaliana GN=ATJ20 PE=1 SV=2//2.60217e-13	mRNA	9.25205	13.6068	6.42271	7.319	19.4593	16.4551	3.98546	38.4455	4.98011	13.7016	17.117	5.34937	3.36406	5.54292	6.08795	29.2577	42.9441	13.1262	10.5745	13.3891	3.2858	2.15943	20.2893	13.9985
Ma04_t15530.2	Ma04_g15530	sp|C0LGE0|Y1765_ARATH Probable LRR receptor-like serine/threonine-protein kinase At1g07650 OS=Arabidopsis thaliana GN=At1g07650 PE=1 SV=1//0	mRNA	5.48841	8.57345	10.714	6.9102	7.46677	4.77525	8.19062	12.4501	10.1552	7.63758	7.77457	5.67689	4.77077	6.14158	6.09015	5.06737	6.99419	6.19128	4.60498	4.35165	5.34224	7.29384	12.0762	6.41494
Ma06_t23510.1	Ma06_g23510	sp|Q9M9Q6|SCP50_ARATH Serine carboxypeptidase-like 50 OS=Arabidopsis thaliana GN=SCPL50 PE=2 SV=1//2.2728e-146	mRNA	10.6111	19.8148	11.6573	15.8754	11.3181	7.19656	16.0329	8.09483	17.8737	15.2177	10.6222	16.2687	8.72934	8.38845	7.62551	14.0445	15.3742	9.19205	11.0318	13.1749	20.3218	9.55508	9.1992	15.0477
Ma02_t15010.1	Ma02_g15010	sp|Q9SHE9|LBD4_ARATH LOB domain-containing protein 4 OS=Arabidopsis thaliana GN=LBD4 PE=2 SV=1//1.94422e-46	mRNA	0.563252	10.909	8.86205	10.7377	2.31323	1.31578	19.6437	1.30393	23.9493	4.48802	4.39826	8.70317	7.7308	7.76283	4.81651	0.690281	2.52608	12.0061	4.8481	4.25772	16.1342	23.3475	1.09503	14.2984
Ma04_t01020.1	Ma04_g01020	sp|O24621|SIGC_ARATH RNA polymerase sigma factor sigC OS=Arabidopsis thaliana GN=SIGC PE=2 SV=1//2.43552e-99	mRNA	2.39296	2.46669	1.96961	3.28405	3.48921	3.3442	1.41489	1.50295	2.35559	2.79886	2.72881	2.31063	3.22248	3.16906	3.19	4.63352	3.15306	2.8039	2.68386	2.82677	2.47988	2.47997	3.46828	2.36302
Ma07_t08600.1	Ma07_g08600	-//-	mRNA	0	0	0	0	0	0	0	0	0	0	0	0	0	0	0	0	0	0	0	0	0	0	0	0
Ma04_t29830.1	Ma04_g29830	sp|Q0WV13|GAUTD_ARATH Probable galacturonosyltransferase 13 OS=Arabidopsis thaliana GN=GAUT13 PE=2 SV=1//0	mRNA	8.49126	10.0508	9.84837	9.09902	5.99036	6.12143	8.96633	9.0005	10.3606	7.33261	6.65724	9.67326	8.71614	8.97321	9.10922	7.05736	6.77639	5.62897	4.65912	4.90094	8.06094	10.7071	8.21417	9.10654
Ma02_t03650.1	Ma02_g03650	sp|Q9ZVI6|LOR8_ARATH Protein LURP-one-related 8 OS=Arabidopsis thaliana GN=At2g38640 PE=2 SV=1//3.58268e-24	mRNA	0	0.0890515	0	0.0799337	0	0.0998709	0	0.313737	0.137299	0	0	0	0.0784176	0	0.0731589	0	0	0	0.22365	0.104349	0	0	0.262741	0.0830785
Ma06_t18260.1	Ma06_g18260	-//-	mRNA	0.493453	0.334692	0.515058	0.0907228	0.24554	0.221045	0.137385	0.598741	0.289989	0.536638	0.282341	0.133752	0.121991	0.358302	0.242386	0.181867	0.0752569	0.368132	0.129474	0.120269	0.306804	0.0901997	0.75987	0.343056
Ma04_t16000.1	Ma04_g16000	sp|Q93YU2|RUS6_ARATH Protein root UVB sensitive 6 OS=Arabidopsis thaliana GN=RUS6 PE=2 SV=1//0	mRNA	19.6363	22.7728	24.9632	19.481	17.6184	19.4263	21.5274	22.4115	20.1925	20.233	21.4392	19.8573	16.0029	20.285	18.4555	19.2398	17.8999	21.2624	17.6908	15.3942	18.4832	17.8058	21.9554	19.2251
Ma10_t07810.1	Ma10_g07810	sp|Q681X4|ZAT5_ARATH Zinc finger protein ZAT5 OS=Arabidopsis thaliana GN=ZAT5 PE=2 SV=1//7.54935e-28	mRNA	9.16977	2.98924	4.03375	1.73113	4.20616	1.97172	4.01065	35.1683	3.18406	7.73452	3.42746	0.932086	3.99693	3.25836	3.71308	3.92283	5.99105	1.75707	2.2889	2.55379	0.857773	0.916506	15.6526	2.91083
Ma09_t28910.1	Ma09_g28910	-//-	mRNA	0.74908	0.358614	0.344933	0.643746	1.12462	0.603399	0.359691	0.631611	0.690978	0.560733	0.280756	0.0876893	0.315676	0.349981	0.515691	0.357677	0.590774	0.383908	0.450197	0.315089	0.265171	0.391228	0.793332	0.418206
Ma10_t04620.1	Ma10_g04620	-//-	mRNA	1.89392	1.64893	2.31466	2.45305	2.00736	2.95423	1.04709	0.397391	2.41163	1.37457	1.17248	1.72911	2.41974	2.99432	3.34877	2.17025	1.94495	1.8039	3.02947	2.44469	3.33716	2.90573	0.469735	1.32917
Ma06_t08450.1	Ma06_g08450	sp|Q8LDL0|HHL1_ARATH Protein HHL1, chloroplastic OS=Arabidopsis thaliana GN=HHL1 PE=1 SV=1//7.09958e-97	mRNA	15.2704	23.4463	27.4772	26.1523	29.2327	30.4449	22.5369	20.2649	18.2234	21.3655	25.7012	29.9825	15.0294	18.8526	17.3653	28.6389	21.063	24.3875	28.0508	25.8061	21.5081	17.7716	26.7135	22.9487
Ma04_t33260.1	Ma04_g33260	sp|Q944R1|PLY15_ARATH Probable pectate lyase 15 OS=Arabidopsis thaliana GN=At4g13710 PE=2 SV=1//0	mRNA	0.517207	0.86896	0.811193	2.45011	0.884244	1.57127	2.86812	0.183289	2.52419	3.04332	1.59234	4.55877	1.82556	0.596726	1.00478	0.243774	0.980218	0.620846	2.2827	1.75048	4.62909	4.58785	0.116481	4.35739
Ma06_t10040.1	Ma06_g10040	-//-	mRNA	0	0	0	0	3.61609	0	0	0	0	0	0	0	1.72226	13.261	0	0	2.3035	0	0	0	0	0	3.37396	0
Ma10_t27610.1	Ma10_g27610	sp|Q10181|YAW6_SCHPO Uncharacterized protein C3F10.06c OS=Schizosaccharomyces pombe (strain 972 / ATCC 24843) GN=SPAC3F10.06c PE=4 SV=1//2.95726e-43	mRNA	2.41051	2.71074	2.18507	2.67497	3.04266	3.28677	1.4198	2.47125	3.12307	2.61505	3.10536	2.13759	4.29987	2.62138	3.46518	2.13924	3.40193	2.94741	3.10191	2.5127	2.19355	3.14424	3.83835	1.47809
Ma03_t20100.1	Ma03_g20100	sp|P19951|RS142_MAIZE 40S ribosomal protein S14 OS=Zea mays PE=3 SV=1//1.39405e-80	mRNA	109.978	119.412	134.679	90.35	76.184	70.2412	164.841	96.7216	139.12	125.33	175.824	101.98	63.2255	93.4553	90.8947	53.2573	63.3536	101.162	74.2514	72.8392	99.5068	87.9556	88.8481	104.554
Ma11_t08780.1	Ma11_g08780	-//-	mRNA	0	0	0	0	0	0	0	0	0	0	0	0	0	0	0	0	0	0	0	0	0	0	0	0
Ma10_t02900.1	Ma10_g02900	-//-	mRNA	0.0574261	0	0.178194	0.0334654	0.0388274	0	0.113906	0	0.11658	0	0.039047	0.110905	0.0673769	0.288542	0.149278	0.0502671	0.0415955	0.0406845	0.190789	0.177278	0.263625	0.0996734	0	0.0690592
Ma01_t08810.1	Ma01_g08810	sp|Q8GT41|PLA1_PLAAC Putative invertase inhibitor OS=Platanus acerifolia PE=1 SV=1//9.16916e-17	mRNA	0.957529	0.368546	0	0.0662823	0.693969	0.328946	0.37204	5.86769	0	0.309518	0.462975	0.362632	0	0.143756	0	0.197223	0.896352	0	0.279698	0.347569	0.0733372	0	2.19006	0.27497
Ma06_t00570.1	Ma06_g00570	sp|Q851L8|CESA5_ORYSJ Probable cellulose synthase A catalytic subunit 5 [UDP-forming] OS=Oryza sativa subsp. japonica GN=CESA5 PE=2 SV=1//6.81873e-50	mRNA	0.242901	0.536518	0.309632	1.05721	0.336234	0.48436	0.427467	0.188072	0.492875	0.665936	0.111656	0.521323	0.373831	0	0.532584	0.425279	0.467985	0.341748	0.267194	0.374538	0.733168	0.835378	0.15699	0.701021
Ma01_t17900.1	Ma01_g17900	sp|Q6Z4G8|COBL1_ORYSJ COBRA-like protein 1 OS=Oryza sativa subsp. japonica GN=BC1L6 PE=2 SV=1//0	mRNA	42.6879	108.444	58.3415	124.257	62.6216	75.3962	92.5297	24.712	97.7727	104.653	94.9866	167.114	117.504	74.9164	78.6565	71.0882	55.6989	65.9282	97.1647	92.3995	129.867	159.527	33.465	110.349
Ma02_t10160.1	Ma02_g10160	-//-	mRNA	2.36095	10.1612	4.3588	22.4199	10.5743	9.71022	4.21125	0.569726	6.24205	18.8304	5.67277	21.4196	6.76678	5.68594	6.30067	3.60457	3.42043	4.0851	11.266	10.1278	34.147	12.8683	0.696015	18.0137
Ma08_t15430.1	Ma08_g15430	sp|B9FXV5|IF4G_ORYSJ Eukaryotic translation initiation factor 4G OS=Oryza sativa subsp. japonica GN=Os07g0555200 PE=2 SV=2//6.34804e-09	mRNA	3.62037	2.7089	2.95291	3.54216	1.39837	2.8455	1.67072	1.17325	1.57523	0.50683	1.89483	0.26466	2.54517	2.63468	1.1772	0.753149	3.09111	0.80944	0.679179	0.365843	1.36158	0.553641	1.72286	1.3285
Ma08_t15430.2	Ma08_g15430	sp|B9FXV5|IF4G_ORYSJ Eukaryotic translation initiation factor 4G OS=Oryza sativa subsp. japonica GN=Os07g0555200 PE=2 SV=2//6.34804e-09	mRNA	30.4196	25.429	25.6383	23.1238	24.4664	24.7413	26.7858	29.3252	30.9148	24.3546	25.1084	22.6767	29.2912	33.6225	36.4673	28.9397	26.4984	25.7085	23.7833	23.8523	24.3344	27.8265	29.2125	22.4587
Ma00_t02360.1	Ma00_g02360	sp|Q9CA51|MIF1_ARATH Mini zinc finger protein 1 OS=Arabidopsis thaliana GN=MIF1 PE=1 SV=1//5.72898e-25	mRNA	2.28479	5.89551	5.18238	10.1728	6.60002	6.65238	4.41861	1.2938	4.78403	4.80047	6.26572	9.94793	3.4308	2.92555	3.58783	4.7902	4.88999	10.92	5.8545	6.80461	10.7231	8.77893	1.23372	6.30071
Ma03_t30780.1	Ma03_g30780	-//-	mRNA	0.245721	1.11096	1.18303	1.71953	1.37186	1.22541	1.46207	0.0708566	1.27824	0.803562	0.543293	2.09595	1.08044	1.27467	1.08801	0.699038	0.845336	2.17547	1.17322	1.56446	1.85219	2.09617	0.658683	2.03371
Ma00_t02360.2	Ma00_g02360	sp|Q9CA51|MIF1_ARATH Mini zinc finger protein 1 OS=Arabidopsis thaliana GN=MIF1 PE=1 SV=1//5.72898e-25	mRNA	3.37477	6.57884	5.9524	15.8292	8.92217	10.9854	7.75759	1.32198	6.35644	6.91852	6.94933	11.691	7.25016	4.60829	3.58256	9.68145	8.24453	15.1559	10.5119	12.0098	15.9179	15.271	1.02248	8.25925
Ma05_t03980.1	Ma05_g03980	sp|P35339|PGLR3_MAIZE Exopolygalacturonase OS=Zea mays GN=PG2C PE=2 SV=1//5.63593e-117	mRNA	0	0	0	0	0	0	0	0	0	0	0	0	0.0298585	0.0318747	0.0526967	0	0	0	0.0422488	0	0	0	0	0
Ma01_t08500.1	Ma01_g08500	sp|Q94JZ8|PUX7_ARATH Plant UBX domain-containing protein 7 OS=Arabidopsis thaliana GN=PUX7 PE=1 SV=1//5.74491e-153	mRNA	40.1541	35.2517	33.5758	39.928	49.4712	48.9113	31.3724	41.1956	35.0343	33.4499	36.3612	32.7685	44.4409	40.3032	43.2524	57.1931	53.8754	45.0403	47.3737	45.8733	39.0144	37.7438	46.718	40.51
Ma03_t19590.1	Ma03_g19590	sp|C0LGJ1|Y1743_ARATH Probable LRR receptor-like serine/threonine-protein kinase At1g74360 OS=Arabidopsis thaliana GN=At1g74360 PE=2 SV=1//0	mRNA	11.1057	7.29639	7.00253	2.51134	3.07449	1.91417	8.24307	16.8859	6.8497	10.6302	6.01823	2.90079	3.42691	4.85757	5.59368	3.40557	3.53443	2.43038	2.33658	2.69952	2.23837	2.25763	10.8232	2.67153
Ma06_t28220.1	Ma06_g28220	-//-	mRNA	77.8874	71.0462	71.9324	62.3197	59.3834	64.9849	90.739	38.9951	73.1347	66.196	93.9782	72.6569	68.698	61.7057	72.5998	54.4326	44.4778	71.9699	73.6267	72.1013	69.7708	66.8171	45.5912	71.9171
Ma08_t23310.1	Ma08_g23310	sp|B9DFG3|ISE2_ARATH DEAD-box ATP-dependent RNA helicase ISE2, chloroplastic OS=Arabidopsis thaliana GN=ISE2 PE=1 SV=2//0	mRNA	0.247844	0.000123469	1.63045	1.52798	0.000272828	1.10527	0.478147	0.000164119	0.000169767	0.0251033	1.48297	1.95413	0.106449	0.0225213	7.34682e-06	1.67485	1.45773	0.369025	1.74004	1.91726	0.67374	0.701232	0.328	0.444667
Ma08_t23310.3	Ma08_g23310	sp|B9DFG3|ISE2_ARATH DEAD-box ATP-dependent RNA helicase ISE2, chloroplastic OS=Arabidopsis thaliana GN=ISE2 PE=1 SV=2//0	mRNA	2.02674	2.58499	1.63905	2.9292	2.79112	2.75542	2.2037	0.96788	2.88516	2.43013	2.58731	2.28003	3.30587	3.28989	2.88118	3.54884	2.47473	3.54269	1.69038	1.73361	3.40447	3.53964	1.62917	2.42303
Ma08_t23310.2	Ma08_g23310	sp|B9DFG3|ISE2_ARATH DEAD-box ATP-dependent RNA helicase ISE2, chloroplastic OS=Arabidopsis thaliana GN=ISE2 PE=1 SV=2//0	mRNA	0.000407396	0.289473	0.000498321	1.05549	1.13781	0.000557532	0.865346	1.04828e-05	0.271397	0.814765	0.000549279	0.000520281	0.000464287	1.60861e-05	1.30888e-06	0.000718306	0.000594045	0.92273	0.000685324	0.000624713	0.000543848	0.379441	0.000796261	0.564701
Ma06_t25480.1	Ma06_g25480	-//-	mRNA	6.2692	8.6108	8.43359	7.00534	9.12655	7.96831	7.16387	2.98977	8.00486	6.56599	10.1522	6.35344	5.81547	6.18878	6.04186	6.86856	5.56317	6.80903	7.5137	9.61206	6.50485	6.11812	4.80488	8.17376
Ma05_t10820.1	Ma05_g10820	sp|Q5QMM3|WOX8_ORYSJ WUSCHEL-related homeobox 8 OS=Oryza sativa subsp. japonica GN=WOX8 PE=2 SV=1//2.9137e-58	mRNA	0.0738898	0	0.0938462	0	0.101955	0	0.0975505	0	0.0749704	0	0	0	0	0	0	0	0	0	0.12203	0	0.0957614	0	0	0
Ma03_t04440.1	Ma03_g04440	sp|P46465|PRS6A_ORYSJ 26S protease regulatory subunit 6A homolog OS=Oryza sativa subsp. japonica GN=TBP1 PE=2 SV=2//0	mRNA	2.84946	4.11668	4.8189	1.98992	2.34135	2.56295	1.90063	1.99898	3.67213	1.94573	3.46702	3.15823	2.03752	2.88814	3.79829	2.60266	1.57967	2.31841	0.741262	0.956212	1.5616	2.20922	1.88513	1.90305
Ma01_t01070.1	Ma01_g01070	sp|Q3SZ85|PTRD1_BOVIN Putative peptidyl-tRNA hydrolase PTRHD1 OS=Bos taurus GN=PTRHD1 PE=2 SV=2//3.29383e-28	mRNA	26.7885	13.3416	14.0746	14.9368	20.4531	15.0572	10.1786	3.95987	17.4601	9.45841	12.6506	10.4535	29.7947	19.7581	29.0185	14.7813	15.1315	15.6466	16.3407	14.5197	9.87041	13.028	6.92533	14.0584
Ma04_t15400.1	Ma04_g15400	sp|O65924|Y2921_ARATH Putative leucine-rich repeat receptor-like protein kinase At2g19210 OS=Arabidopsis thaliana GN=At2g19210 PE=3 SV=1//2.27243e-158	mRNA	1.54772	1.07495	0.89129	1.99632	1.72994	2.11118	0.956851	1.46496	1.116	0.997295	0.764263	1.00562	1.432	1.71229	1.82431	2.30433	3.10341	1.60175	2.26283	1.96531	1.37121	1.45988	1.92096	1.70917
Ma09_t18570.1	Ma09_g18570	sp|A3C039|SAP1_ORYSJ Zinc finger A20 and AN1 domain-containing stress-associated protein 1 OS=Oryza sativa subsp. japonica GN=SAP1 PE=2 SV=2//5.82759e-27	mRNA	14.8411	11.6349	15.7556	8.60119	24.7398	8.37728	9.87934	39.1029	9.36823	16.5327	14.7367	4.21326	11.6141	19.3354	15.7099	8.89979	8.53677	8.82301	10.1524	11.1768	6.69107	7.73399	18.0574	7.42475
Ma06_t37850.1	Ma06_g37850	-//-	mRNA	13.4924	7.38772	5.58303	5.35726	8.24563	8.06336	5.7963	16.3933	7.38205	6.22211	5.92414	4.76962	11.0668	8.90639	9.59119	9.57928	8.61373	4.90837	8.01133	7.29095	3.91723	5.65756	16.2271	7.37734
Ma07_t25810.1	Ma07_g25810	sp|Q6PNC0|DMXL1_MOUSE DmX-like protein 1 OS=Mus musculus GN=Dmxl1 PE=1 SV=1//6.44814e-14	mRNA	12.1854	14.369	14.0264	14.8048	14.2571	15.1511	13.3766	14.7732	13.6115	12.1454	12.417	13.1174	13.3587	17.3927	14.3541	19.0567	17.7647	15.1094	13.3141	13.0087	13.3757	14.6224	16.0648	12.935
Ma10_t21700.1	Ma10_g21700	sp|Q93WI9|HD3A_ORYSJ Protein HEADING DATE 3A OS=Oryza sativa subsp. japonica GN=HD3A PE=1 SV=1//6.77154e-104	mRNA	0	0	0	0	0	0	0	0	0	0	0	0	0	0	0	0	0	0	0	0	0	0	0	0
Ma06_t37190.1	Ma06_g37190	sp|O22227|MIZ1_ARATH Protein MIZU-KUSSEI 1 OS=Arabidopsis thaliana GN=MIZ1 PE=1 SV=1//9.21855e-43	mRNA	0	0	0	0	0	0	0	0	0	0	0	0	0	0	0	0	0	0	0.0829947	0	0	0	0	0
Ma01_t06730.1	Ma01_g06730	sp|Q9CAP8|LACS9_ARATH Long chain acyl-CoA synthetase 9, chloroplastic OS=Arabidopsis thaliana GN=LACS9 PE=2 SV=1//0	mRNA	0.799172	0.93237	1.63441	1.86561	0.899123	1.79329	0.855265	1.21688	1.57492	1.06985	1.01828	1.69463	0.914962	1.56458	1.28604	0.843543	1.48244	0.717714	2.36747	1.85095	2.36919	1.78691	1.21685	1.33069
Ma10_t04700.1	Ma10_g04700	sp|Q8GWJ7|CRK19_ARATH Cysteine-rich receptor-like protein kinase 19 OS=Arabidopsis thaliana GN=CRK19 PE=2 SV=2//4.55419e-130	mRNA	15.3064	18.8146	16.3712	23.8477	18.0159	21.8301	13.8883	21.8513	28.9155	19.2038	13.737	14.7042	23.8608	19.4309	17.8922	47.3879	46.9396	7.85205	19.8504	21.2766	10.7167	18.0231	36.3074	30.0185
Ma10_t19540.2	Ma10_g19540	-//-	mRNA	0.223111	0.291674	2.53478e-05	0.63818	0.362845	0.564069	0.447829	0.762269	1.22167e-05	0.285011	0.382844	1.86175e-05	0.239295	0.159084	0.238741	1.95729e-05	0.380582	0.2106	0.500661	9.88772e-05	0.392065	0.134181	0.166627	3.59428e-05
Ma06_t37840.2	Ma06_g37840	sp|Q8GUQ5|BRI1_SOLLC Brassinosteroid LRR receptor kinase OS=Solanum lycopersicum GN=CURL3 PE=1 SV=1//0	mRNA	0.216277	0.334233	0.320363	1.04058	0.783275	0.657375	0.78507	0.330766	0.246936	1.81065	0.450679	1.7591	0.817388	0.414766	0.458411	0.771574	1.00086	1.17497	2.47021	2.58182	1.71916	1.13779	0.159672	1.79732
Ma06_t37840.3	Ma06_g37840	sp|Q8GUQ5|BRI1_SOLLC Brassinosteroid LRR receptor kinase OS=Solanum lycopersicum GN=CURL3 PE=1 SV=1//0	mRNA	0.000648902	0.000826515	3.89156e-06	3.06795e-06	3.66876e-06	0.00089161	3.56025e-06	7.66334e-06	0.000659838	3.28445e-06	0.000879014	3.04533e-06	0.000770194	0.000804052	2.82777e-06	0.00114903	0.367685	3.53902e-06	3.87341e-06	3.66193e-06	0.000862343	2.91212e-06	0.00127366	2.84788e-06
Ma06_t37840.1	Ma06_g37840	sp|Q8GUQ5|BRI1_SOLLC Brassinosteroid LRR receptor kinase OS=Solanum lycopersicum GN=CURL3 PE=1 SV=1//0	mRNA	0.15165	0.193322	2.52567e-05	2.51641e-05	2.78733e-05	0.421236	2.71986e-05	4.47077e-05	0.153972	2.92004e-05	0.205126	2.19629e-05	0.179484	0.187464	2.05283e-05	0.265909	0.000122347	2.09321e-05	2.87912e-05	3.39006e-05	0.200203	2.44583e-05	0.594478	2.58831e-05
Ma06_t30180.1	Ma06_g30180	sp|Q08480|KAD4_ORYSJ Adenylate kinase 4 OS=Oryza sativa subsp. japonica GN=ADK-B PE=2 SV=1//1.80339e-21	mRNA	1.55347	0.820638	0.772383	1.39857	5.91066	6.66713	0	3.80294	3.15514	0.690213	2.36912	1.97034	1.07508	1.63263	5.60172	1.80557	0	0.678259	0.806292	2.34061	3.61721	0.552865	1.94055	6.70678
Ma10_t20950.3	Ma10_g20950	sp|Q9AWL7|GIGAN_ORYSJ Protein GIGANTEA OS=Oryza sativa subsp. japonica GN=GI PE=2 SV=2//0	mRNA	4.60437	2.17072	1.20911	2.93763	1.31558	0.00031589	1.07605	1.45812	2.14529	1.45081	0.997325	1.03097	1.08989	2.49142	5.36482	1.66483	3.37626	1.28303	2.15668	1.18524	0.601635	1.38135	0.980859	1.35338
Ma10_t19030.1	Ma10_g19030	sp|Q8H1E4|RAP24_ARATH Ethylene-responsive transcription factor RAP2-4 OS=Arabidopsis thaliana GN=RAP2-4 PE=1 SV=1//7.43101e-43	mRNA	0.845759	0.705881	0.452616	0.398815	3.26803	4.30002	0.362795	2.21236	0.464071	0.755918	0.434517	0.441447	0.591114	0.400657	0.401734	5.68242	5.49849	3.43595	2.31802	3.2111	0.420398	0.688418	2.05166	1.28798
Ma10_t20950.1	Ma10_g20950	sp|Q9AWL7|GIGAN_ORYSJ Protein GIGANTEA OS=Oryza sativa subsp. japonica GN=GI PE=2 SV=2//0	mRNA	18.6555	11.0822	19.0237	20.5562	32.9363	28.6314	11.214	40.7747	9.46364	23.1546	17.3823	30.2783	12.872	11.994	6.90062	23.5376	33.7305	14.8398	26.7486	23.6826	7.03168	6.63659	24.5044	14.1663
Ma04_t04030.1	Ma04_g04030	sp|Q9ZSP5|AIR3_ARATH Subtilisin-like protease SBT5.3 OS=Arabidopsis thaliana GN=AIR3 PE=2 SV=1//0	mRNA	0.424829	0.175526	0.742814	0.0317792	0.938876	0.864854	1.48677	0.0315408	2.36509	1.43628	0.779621	2.77	0.420035	0.358452	0.351038	0.0479817	0.715219	0.291864	1.36855	1.65041	4.43955	1.17661	0.0802991	2.04376
Ma04_t27720.1	Ma04_g27720	sp|Q43117|KPYA_RICCO Pyruvate kinase isozyme A, chloroplastic OS=Ricinus communis PE=1 SV=1//0	mRNA	3.41113	6.34942	6.37148	8.91698	8.62857	9.50404	5.48107	2.30313	3.8254	5.51475	5.352	8.18558	5.65596	5.52958	3.65627	10.5989	7.22213	8.87001	8.25912	7.91329	7.61164	6.91569	5.75293	7.62345
Ma03_t16410.1	Ma03_g16410	sp|Q9ZQ96|U73C3_ARATH UDP-glycosyltransferase 73C3 OS=Arabidopsis thaliana GN=UGT73C3 PE=2 SV=1//4.53288e-145	mRNA	10.6416	4.00327	8.2541	6.52688	6.35898	6.86519	7.16195	3.91281	9.76037	7.79753	3.24112	13.244	6.24064	6.15617	6.72767	4.64108	10.7154	8.6886	12.5456	9.62682	22.3434	6.8821	8.89252	9.46897
Ma08_t14010.1	Ma08_g14010	sp|Q10S72|4CLL4_ORYSJ 4-coumarate--CoA ligase-like 4 OS=Oryza sativa subsp. japonica GN=4CLL4 PE=2 SV=1//0	mRNA	84.7684	73.9361	55.419	56.4799	81.2743	44.1236	57.4707	112.382	49.571	75.9611	64.3061	42.7268	53.7428	46.3146	44.2953	85.0556	67.2288	52.5477	59.1095	67.0444	35.537	42.0952	69.557	47.1685
Ma03_t23680.1	Ma03_g23680	sp|P53763|URIC_PHAVU Uricase-2 OS=Phaseolus vulgaris GN=URIII PE=1 SV=2//5.1665e-152	mRNA	84.5739	79.7615	61.6876	47.6969	42.469	33.0723	76.4424	206.151	65.6318	67.3347	58.6807	46.1913	49.458	56.2241	61.1066	74.6192	83.9122	65.8568	51.1524	51.5438	55.5986	52.6377	131.548	61.1599
Ma01_t05060.1	Ma01_g05060	sp|Q8GUH2|Y1015_ARATH Uncharacterized protein At1g01500 OS=Arabidopsis thaliana GN=At1g01500 PE=2 SV=1//2.46814e-100	mRNA	2.49181	2.9256	3.05593	3.12736	4.15453	4.01406	3.10168	2.47755	2.20703	2.69254	2.68791	2.64203	3.27196	2.69391	2.65594	5.21766	3.32736	2.84008	3.85738	3.99737	2.66255	3.22501	4.47994	3.07773
Ma04_t17260.1	Ma04_g17260	-//-	mRNA	0.0282463	0	0	0.197496	0.190942	0.361384	0.0373519	0.521115	0.0860143	0.19451	0.0384075	0.436408	0	0.0709441	0.0587134	0.24725	0.204601	0	0.187699	0.217998	0.296425	0.0326871	0.27541	0.1698
Ma06_t20230.1	Ma06_g20230	-//-	mRNA	0.77826	0.562874	1.26321	1.04116	1.09003	1.18398	1.16436	0.85659	1.20734	1.1671	2.07694	1.19714	0.719356	1.06651	0.830318	0.928267	0.539781	1.64356	2.04736	1.87284	2.01277	2.14764	0.727357	1.31741
Ma04_t32380.1	Ma04_g32380	sp|O23470|GDL64_ARATH GDSL esterase/lipase At4g16230 OS=Arabidopsis thaliana GN=At4g16230 PE=3 SV=2//8.9728e-50	mRNA	0.0309277	0	0.0768608	0.360742	0.125589	0.0440764	0.0408938	0.0713491	0.188354	0.255508	0.252501	0.597301	0.253831	0.116695	0.0322287	0.108289	0	0.0438093	0	0	0.972996	0.465047	0.0602933	0.186183
Ma04_t25790.1	Ma04_g25790	-//-	mRNA	0	0	0	0	0	0	0	0	0	0	0	0	0	0	0	0	0	0	13.2554	0	0	0	0	0
Ma06_t20230.2	Ma06_g20230	-//-	mRNA	0.000202888	2.57411e-06	2.372e-06	0.0858942	1.0958e-05	1.88295e-05	1.87571e-05	3.71522e-06	0.0663274	1.34277e-05	1.07237e-05	0.475311	0.233804	6.87106e-06	2.67482e-05	2.95219e-06	2.06346e-05	0.123361	5.20337e-05	0.676748	0.117275	1.76363e-05	4.89986e-06	1.53611e-05
Ma08_t16570.1	Ma08_g16570	-//-	mRNA	20.4616	21.3474	23.0868	22.7653	23.1459	25.5058	18.7427	22.5111	21.5584	19.2063	19.7239	22.1865	22.3758	24.3024	21.8585	28.706	24.7031	20.4843	21.4822	22.1402	19.7558	22.0766	22.3129	19.2745
Ma05_t21080.1	Ma05_g21080	sp|Q8W4S4|VHAA3_ARATH V-type proton ATPase subunit a3 OS=Arabidopsis thaliana GN=VHA-a3 PE=1 SV=1//0	mRNA	105.727	104.422	118.38	78.6058	85.2578	96.0049	108.785	155.135	101.013	102.034	118.377	95.3744	85.4932	108.57	102.543	89.6506	72.8313	95.7406	73.8451	71.8661	77.7514	92.2112	128.399	92.1997
Ma04_t13290.1	Ma04_g13290	sp|Q9FJZ9|PER72_ARATH Peroxidase 72 OS=Arabidopsis thaliana GN=PER72 PE=1 SV=1//2.59001e-162	mRNA	7.8566	9.41712	6.13574	14.9128	7.18098	11.1471	14.0958	25.8415	12.7068	16.9551	6.58419	14.1615	6.27322	5.78155	5.64991	3.48441	25.0804	6.3847	17.8424	15.3211	17.6332	11.0961	3.62675	17.0468
Ma08_t16570.2	Ma08_g16570	-//-	mRNA	2.007	1.57939	1.05129	2.51389	3.06402	3.04127	1.01158	1.3305	1.17071	2.14355	2.2706	2.83095	2.86914	2.44907	3.72351	1.75035	2.79072	1.62543	1.51618	0.997809	2.51088	2.96878	2.42864	2.56141
Ma02_t08140.1	Ma02_g08140	sp|O82796|SERC_ARATH Phosphoserine phosphatase, chloroplastic OS=Arabidopsis thaliana GN=PSP PE=1 SV=2//4.99747e-136	mRNA	3.36661	8.3955	5.44281	3.05474	2.72068	3.07663	2.9829	10.2522	5.16191	3.74623	2.29346	2.85903	1.25781	6.36907	4.50033	3.88746	3.68247	1.41956	2.13984	2.04513	1.68793	2.19365	14.6546	4.36654
Ma06_t20220.1	Ma06_g20220	-//-	mRNA	0.0667894	0.0878714	1.94394	2.12991	0.367453	0.394032	0.970186	0	0.948788	0.55002	0.0917546	0.860037	0.387169	0.0857486	0.360787	0	0	0	0.883238	0.51507	1.12738	1.1514	0	2.45927
Ma09_t25320.1	Ma09_g25320	-//-	mRNA	1.19436	0.964298	0	2.45512	0	2.66079	0.780134	0	2.42535	1.5859	0.921624	1.50528	0.612243	2.87409	2.8533	2.07528	1.65798	3.08541	0	0.893478	2.05212	0	1.11491	0
Ma11_t06040.1	Ma11_g06040	-//-	mRNA	8.70749	8.3918	9.68919	11.7461	10.5106	12.8877	9.53456	6.34881	10.0563	9.68976	9.73239	10.7913	9.2972	10.9705	9.48927	10.6087	12.9957	13.4894	10.2714	10.2506	13.2653	10.0229	9.73201	8.25068
Ma11_t17110.4	Ma11_g17110	sp|P48504|QCR6_SOLTU Cytochrome b-c1 complex subunit 6 OS=Solanum tuberosum PE=1 SV=2//5.224e-30	mRNA	17.2735	18.4674	21.888	12.6896	15.7444	13.4997	17.5154	38.3853	18.3194	14.3529	19.1986	16.52	13.8901	19.4213	17.951	15.9187	7.0048	11.8333	8.09339	5.61118	9.35033	9.90855	36.4992	15.898
Ma09_t23920.1	Ma09_g23920	sp|O82054|COMT1_SACOF Caffeic acid 3-O-methyltransferase OS=Saccharum officinarum GN=COMT PE=2 SV=1//0	mRNA	21.4633	47.7473	94.8556	96.13	92.0106	95.4633	77.2758	10.3429	93.4854	56.5593	55.2224	135.939	84.1438	62.187	59.6235	25.9049	29.922	73.5192	111.861	111.382	187.789	184.706	6.87739	94.2806
Ma11_t17110.3	Ma11_g17110	sp|P48504|QCR6_SOLTU Cytochrome b-c1 complex subunit 6 OS=Solanum tuberosum PE=1 SV=2//5.224e-30	mRNA	4.59173	5.89359	3.63815	4.99367	4.27648	3.79731	5.86923	9.58888	3.93082	3.61222	5.96344	5.01545	3.44053	4.13467	4.8903	4.7571	4.94169	5.24727	3.0092	3.17473	3.2631	3.19632	7.13537	4.28176
Ma11_t17110.1	Ma11_g17110	sp|P48504|QCR6_SOLTU Cytochrome b-c1 complex subunit 6 OS=Solanum tuberosum PE=1 SV=2//5.224e-30	mRNA	1.47824e-05	0.429988	1.14972	1.02395	6.83276e-06	9.20292e-07	1.82725	3.16888	0.352704	0.12219	1.11011	0.000325661	0.181127	0.000182564	0.866016	2.83141e-09	1.53157e-11	0.672672	5.3585e-05	4.06137e-05	7.09913e-06	1.37901e-05	0.618596	2.38051e-05
Ma11_t15020.1	Ma11_g15020	sp|Q9T043|RL142_ARATH 60S ribosomal protein L14-2 OS=Arabidopsis thaliana GN=RPL14B PE=2 SV=1//6.44409e-69	mRNA	325.09	346.864	425.471	252.927	234.023	226.659	518.219	304.591	358.349	406.466	503.509	318.742	244.579	268.861	247.35	188.126	160.538	312.156	235.319	219.913	326.557	320.515	296.6	295.54
Ma02_t18320.1	Ma02_g18320	sp|Q9C682|BH115_ARATH Transcription factor bHLH115 OS=Arabidopsis thaliana GN=BHLH115 PE=2 SV=1//2.03679e-51	mRNA	44.6473	37.6158	30.4851	26.6322	33.4342	34.476	29.8774	110.67	33.1322	37.3568	25.7192	27.9896	38.6737	39.0126	41.2905	73.3461	85.0854	48.1163	27.1212	28.8793	25.0915	28.8267	78.963	43.8136
Ma09_t25330.1	Ma09_g25330	sp|Q9FVS1|FBK23_ARATH F-box/kelch-repeat protein At1g57790 OS=Arabidopsis thaliana GN=At1g57790 PE=2 SV=1//2.58623e-13	mRNA	0	0	0	0	0	0	0	0	0	0	0	0	0	0	0	0	0	0	0	0	0	0	0	0
Ma04_t30600.1	Ma04_g30600	sp|P27521|CA4_ARATH Chlorophyll a-b binding protein 4, chloroplastic OS=Arabidopsis thaliana GN=LHCA4 PE=1 SV=1//7.82491e-152	mRNA	0	0	0	0	0.0572398	0.0606043	0	0	0	0.115763	0	1.35449	0	0	0	0	0	0	0.279118	0	0	0	0	0
Ma05_t13470.1	Ma05_g13470	sp|Q9M080|ERF43_ARATH Ethylene-responsive transcription factor ERF043 OS=Arabidopsis thaliana GN=ERF043 PE=2 SV=1//1.1598e-34	mRNA	2.06778	4.83388	3.51285	7.35872	4.38655	1.96421	4.48226	0.668796	2.30851	3.69786	4.57075	5.43132	3.28639	2.40689	1.91595	4.3441	3.77202	6.25925	6.58431	5.80742	5.73043	4.87002	1.2885	3.15436
Ma07_t01850.1	Ma07_g01850	-//-	mRNA	1.5249	2.41661	2.73753	5.51165	2.89943	4.36471	2.40382	1.29935	2.79903	2.61971	1.72924	4.46441	1.9164	1.82866	2.09072	2.45014	3.4208	2.99261	3.50826	3.64401	6.34228	4.45372	1.67147	3.10207
Ma06_t08020.1	Ma06_g08020	sp|Q9FRH4|IDD16_ARATH Protein indeterminate-domain 16 OS=Arabidopsis thaliana GN=IDD16 PE=2 SV=1//6.39891e-09	mRNA	5.66393	3.50151	9.74928	7.85462	6.93446	7.44831	3.97016	9.40641	7.30788	3.45409	6.53774	3.6017	5.7503	10.163	12.5051	5.99881	10.5139	7.29103	8.78116	7.6569	5.5338	7.95155	6.78712	6.18986
Ma07_t20030.1	Ma07_g20030	sp|Q9LSA5|FBK62_ARATH F-box/kelch-repeat protein At3g18720 OS=Arabidopsis thaliana GN=At3g18720 PE=2 SV=1//1.00118e-13	mRNA	0	0	0	0	0	0	0	0	0.0312996	0	0	0	0	0	0	0	0	0	0	0	0	0	0	0
Ma02_t12780.1	Ma02_g12780	sp|Q9LMN8|WAK3_ARATH Wall-associated receptor kinase 3 OS=Arabidopsis thaliana GN=WAK3 PE=2 SV=2//6.23503e-12	mRNA	0	0.0334102	0.080335	0.0151239	0	0	0	0	0	0	0	0	0	0	0	0.02284	0.0189148	0	0	0	0	0	0	0
Ma11_t18910.1	Ma11_g18910	-//-	mRNA	0	0	0	0	0	0	0	0	0	0	0	0	0	0	0	0	0	0	0	0	0	0	0	0
Ma04_t14030.1	Ma04_g14030	sp|Q9SPL4|AMP22_MACIN Vicilin-like antimicrobial peptides 2-2 OS=Macadamia integrifolia GN=AMP2-2 PE=2 SV=1//4.04314e-26	mRNA	0.0333568	0	0	0	0	0	0	0	0	0	0	0	0	0	0	0.0291978	0	0	0	0	0	0	0	0
Ma07_t07990.1	Ma07_g07990	sp|Q2QMB3|LOL2_ORYSJ Protein LOL2 OS=Oryza sativa subsp. japonica GN=LOL2 PE=2 SV=1//5.01926e-54	mRNA	74.8591	84.6179	83.3495	50.8254	76.1753	77.8572	59.4863	148.721	54.2637	59.9195	67.7103	58.2569	68.2005	73.1566	72.5075	124.355	92.1092	67.1446	61.8165	67.6464	43.516	68.9951	142.179	89.7026
Ma01_t11900.1	Ma01_g11900	sp|P19199|POL_COYMV Polyprotein P3 OS=Commelina yellow mottle virus PE=3 SV=2//6.86682e-16	mRNA	0	0	0	0	0	0	0	0	0	0	0	0	0	0	0	0	0	0	0	0	0	0	0	0
Ma07_t15840.1	Ma07_g15840	sp|Q9SV15|WRK11_ARATH Probable WRKY transcription factor 11 OS=Arabidopsis thaliana GN=WRKY11 PE=2 SV=2//1.74904e-71	mRNA	48.1836	28.3874	26.2035	26.8273	32.6349	25.9185	24.8982	21.8672	28.855	21.4685	28.8442	24.322	50.7956	28.0379	34.3515	33.1886	25.9906	24.4272	35.2506	39.1469	25.4342	32.4667	24.8067	29.8316
Ma04_t06300.2	Ma04_g06300	sp|Q39183|D6KL2_ARATH Serine/threonine-protein kinase D6PKL2 OS=Arabidopsis thaliana GN=D6PKL2 PE=1 SV=1//0	mRNA	21.8219	22.1104	21.0643	25.989	24.1443	27.8995	17.509	20.4666	23.6406	24.4348	21.9952	25.411	31.162	24.8193	25.8127	32.8114	29.2434	24.9119	27.3722	26.1265	24.8045	26.7805	19.9613	27.7983
Ma04_t06300.1	Ma04_g06300	sp|Q39183|D6KL2_ARATH Serine/threonine-protein kinase D6PKL2 OS=Arabidopsis thaliana GN=D6PKL2 PE=1 SV=1//0	mRNA	0.45264	0.612652	9.59156e-05	0.539671	1.18914	1.01037	0.270894	2.10409	0.257219	0.444416	0.271437	0.350282	1.05678	1.68272	1.70056	4.17255e-05	4.19061e-05	1.02034	5.6388e-05	0.788643	0.341143	1.30595	0.989565	1.35638
Ma10_t30420.1	Ma10_g30420	sp|Q9SZN7|HIP26_ARATH Heavy metal-associated isoprenylated plant protein 26 OS=Arabidopsis thaliana GN=HIPP26 PE=1 SV=1//6.53724e-44	mRNA	0	0	0	0	0	0	0	0	0	0	0	0.268253	0.59679	0	0.116998	0	0	0	0	0	0	0.118911	0	0
Ma06_t36940.1	Ma06_g36940	sp|A4K526|TM256_BUFGR Transmembrane protein 256 homolog OS=Bufo gargarizans PE=3 SV=1//6.861e-17	mRNA	6.67757	8.28139	7.42456	6.80222	5.69349	6.56708	7.40947	9.24056	5.74658	5.27769	9.08162	7.02748	5.3134	5.43494	5.34498	5.84512	6.60313	7.19879	4.43684	4.83981	5.97808	4.93811	7.30284	6.11103
Ma08_t24100.1	Ma08_g24100	-//-	mRNA	0	0	0	0	0	0	0	0	0	0	0	0	0	0	0	0	0	0	0	0	0	0	0	0
Ma02_t03940.1	Ma02_g03940	sp|Q9SYI0|SECA1_ARATH Protein translocase subunit SECA1, chloroplastic OS=Arabidopsis thaliana GN=SECA1 PE=2 SV=2//0	mRNA	6.41491	7.92964	6.33069	9.20087	9.63691	9.97249	6.94622	5.68833	6.9858	7.47915	7.35061	8.46747	8.5874	8.45274	9.09563	13.0574	11.9905	10.3937	8.62316	9.29501	8.1486	9.13008	8.15811	8.19423
Ma06_t35700.1	Ma06_g35700	sp|Q9ST43|PH1_ARATH Pleckstrin homology domain-containing protein 1 OS=Arabidopsis thaliana GN=PH1 PE=2 SV=2//2.70068e-61	mRNA	23.8268	26.4264	27.9696	26.8834	34.7833	32.9249	21.0677	19.1657	18.3754	22.1521	21.913	26.1005	22.2122	17.7828	19.054	28.6201	23.3132	25.1489	28.1304	28.0652	21.8536	19.1111	21.3297	27.8007
Ma07_t15850.1	Ma07_g15850	sp|Q8VZF6|EDR2L_ARATH Protein ENHANCED DISEASE RESISTANCE 2-like OS=Arabidopsis thaliana GN=EDR2L PE=2 SV=1//6.98966e-58	mRNA	22.7919	26.0354	30.0217	22.1755	28.0037	26.2109	22.9758	15.7291	17.1803	19.8317	19.273	22.117	21.8717	18.1515	17.4128	21.867	15.9401	21.2797	33.8075	29.0283	23.4557	23.9398	15.7096	27.9733
Ma09_t03120.4	Ma09_g03120	-//-	mRNA	10.126	5.49074	4.61895	4.44419	4.87685	3.5964	5.37301	10.3523	7.14808	7.93156	7.84708	4.8642	8.42384	7.76416	8.28103	4.909	5.02035	5.65652	4.10563	5.01888	3.87125	4.8235	5.6257	4.22282
Ma08_t08860.1	Ma08_g08860	sp|Q93W88|BH137_ARATH Transcription factor bHLH137 OS=Arabidopsis thaliana GN=BHLH137 PE=2 SV=1//7.27957e-42	mRNA	0	0	0	0	0	0	0	0	0	0	0	0	0	0	0	0	0	0	0	0	0	0	0	0
Ma11_t20100.1	Ma11_g20100	sp|A2RVM0|TIC32_ARATH Short-chain dehydrogenase TIC 32, chloroplastic OS=Arabidopsis thaliana GN=TIC32 PE=2 SV=1//5.71615e-64	mRNA	0.192998	0.100121	0.0962991	0.0902859	0.262128	0.0554098	0.153072	0.267424	0.274237	0.371783	0.315779	0	0.270885	0.29256	0.0405307	0.54061	0.503017	0.764675	0.0640385	0.29784	0.403959	0.133756	0.0751868	0.373309
Ma07_t06780.1	Ma07_g06780	sp|Q93XY5|TET18_ARATH Tetraspanin-18 OS=Arabidopsis thaliana GN=TOM2AH2 PE=2 SV=1//3.43809e-57	mRNA	36.1947	46.2862	31.9563	48.7862	60.7666	63.2796	35.9136	30.6777	33.0517	40.9196	46.1211	54.0839	52.7575	39.0229	40.7058	73.0416	58.6024	52.026	60.785	68.2953	48.1412	50.6266	38.1719	53.3694
Ma08_t24430.1	Ma08_g24430	-//-	mRNA	0	0.640077	0	0.114384	1.60301	0.872944	0.379341	0	0.194475	1.04979	1.4599	6.04854	0.330394	0	0	0	0	0.538372	0.315721	0	0.741086	0.657586	0	1.55391
Ma10_t12800.1	Ma10_g12800	sp|Q9WTK3|GPAA1_MOUSE Glycosylphosphatidylinositol anchor attachment 1 protein OS=Mus musculus GN=Gpaa1 PE=1 SV=3//1.79387e-28	mRNA	17.9423	15.6043	16.0272	14.2065	14.8213	15.1412	18.527	17.3253	19.1966	15.9665	17.9249	17.5233	14.9201	15.9082	15.0134	14.9689	16.9883	15.1251	13.6945	16.4917	17.1474	16.1488	15.9335	16.1578
Ma01_t00200.1	Ma01_g00200	sp|Q8GYN5|RIN4_ARATH RPM1-interacting protein 4 OS=Arabidopsis thaliana GN=RIN4 PE=1 SV=1//1.4469e-07	mRNA	4.18062	6.25388	4.22695	5.08527	4.5066	4.4478	3.4826	8.79443	4.50319	5.29777	4.41499	4.72071	5.97	4.86493	5.129	6.08068	5.2087	3.80917	4.14773	4.06744	5.76607	5.17657	4.87235	9.22378
Ma09_t26810.1	Ma09_g26810	sp|Q7Z419|R144B_HUMAN E3 ubiquitin-protein ligase RNF144B OS=Homo sapiens GN=RNF144B PE=1 SV=1//1.9303e-11	mRNA	12.2477	15.0537	19.056	15.1843	18.9413	23.0473	12.2299	19.6043	13.0759	14.4791	14.4069	16.8533	13.6033	14.5778	16.547	19.2404	15.8513	14.3288	13.9408	13.6473	12.3136	11.7355	16.7011	12.518
Ma04_t05400.1	Ma04_g05400	sp|Q9SSE9|JMJ25_ARATH Lysine-specific demethylase JMJ25 OS=Arabidopsis thaliana GN=JMJ25 PE=1 SV=1//0	mRNA	0.0406494	0.225596	0.0500721	0.0471294	0.0728029	0.0379995	0.12549	0.280664	0.0825335	0.186858	0.146821	0.174446	0.031948	0.0168754	0.0694064	0.0237206	0.0196436	0.115433	0.112764	0.0418418	0.0713776	0.125772	0	0
Ma01_t19710.1	Ma01_g19710	sp|O22467|MSI1_ARATH Histone-binding protein MSI1 OS=Arabidopsis thaliana GN=MSI1 PE=1 SV=1//9.62128e-150	mRNA	7.54638	9.71095	11.0825	12.268	10.6151	10.8064	12.2701	12.7105	10.6823	12.3695	12.942	14.7372	10.6871	10.5472	10.2134	8.08019	7.6245	12.5335	14.0795	12.3263	17.2187	13.6059	7.92495	19.2582
Ma05_t02480.1	Ma05_g02480	sp|O64688|ODPB3_ARATH Pyruvate dehydrogenase E1 component subunit beta-3, chloroplastic OS=Arabidopsis thaliana GN=E1-BETA-2 PE=2 SV=1//0	mRNA	42.9095	41.5896	36.2965	31.5501	36.0068	40.8086	40.4958	36.158	28.8632	37.8152	41.2016	44.0281	53.5927	49.231	48.5335	29.6379	28.7085	56.4454	59.9591	56.0924	56.463	49.498	35.4067	52.9168
Ma06_t31240.1	Ma06_g31240	sp|Q9S7E9|GGT2_ARATH Glutamate--glyoxylate aminotransferase 2 OS=Arabidopsis thaliana GN=GGAT2 PE=1 SV=1//0	mRNA	4.91563e-05	6.14652e-05	5.89964e-05	5.35598e-05	6.16307e-05	6.47985e-05	6.43891e-05	0.000110349	0.616731	6.55777e-05	6.44842e-05	0.39143	0.361364	0.376611	0.308578	8.5008e-05	0.44235	6.69737e-05	7.82363e-05	0.471067	0.403258	0.354949	9.11647e-05	0.720046
Ma04_t22300.3	Ma04_g22300	sp|Q0WSY2|FPP4_ARATH Filament-like plant protein 4 OS=Arabidopsis thaliana GN=FPP4 PE=1 SV=1//0	mRNA	4.85043	6.01949	2.10674	4.94364	5.1753	6.81402	4.50952	4.73045	5.27315	2.4871	3.25678	6.45219	3.9867	6.27554	4.2294	6.50445	8.45952	5.75782	4.80116	3.77777	4.90436	4.41123	3.6106	4.76901
Ma03_t33060.1	Ma03_g33060	sp|Q5SSZ7|ZNRF3_MOUSE E3 ubiquitin-protein ligase ZNRF3 OS=Mus musculus GN=Znrf3 PE=1 SV=1//6.45224e-10	mRNA	1.81359	2.49028	8.81258	8.73158	10.384	10.4427	3.50042	0.418696	2.13527	5.79064	8.45175	13.4968	2.12279	2.51673	2.58389	1.84153	2.36368	5.03152	5.89909	6.94133	12.582	9.68216	0.565365	3.19706
Ma03_t17740.1	Ma03_g17740	sp|Q10716|CYSP1_MAIZE Cysteine proteinase 1 OS=Zea mays GN=CCP1 PE=2 SV=1//0	mRNA	247.366	319.128	219.825	301.406	352.605	307.234	223.03	325.628	187.557	326.226	331.576	434.107	237.862	202.487	226.237	362.261	278.238	243.087	348.489	344.629	219.248	238.822	237.977	327.829
Ma08_t24420.1	Ma08_g24420	sp|Q5F3Z5|DNJB6_CHICK DnaJ homolog subfamily B member 6 OS=Gallus gallus GN=DNAJB6 PE=2 SV=1//3.62764e-13	mRNA	7.50239	7.75841	11.7	9.58995	15.3487	10.2763	11.6766	9.13034	6.41435	7.67986	10.4768	10.3259	4.80067	7.55603	6.81881	7.89359	9.1515	13.1816	10.671	12.9472	9.96381	7.72893	11.3042	10.0885
Ma07_t25160.1	Ma07_g25160	sp|Q6X1C0|GLT2_CROSA Crocetin glucosyltransferase 2 OS=Crocus sativus GN=GLT2 PE=1 SV=1//1.98713e-117	mRNA	41.9754	66.1419	41.1224	12.7414	14.2307	6.2495	16.6781	104.496	56.1219	11.6037	13.0004	4.87773	10.7776	47.0319	46.8095	22.4593	27.8603	11.2041	16.1015	17.1443	6.27204	8.87431	172.659	24.6198
Ma10_t16270.1	Ma10_g16270	-//-	mRNA	4.41506	11.8513	10.9565	7.31045	9.49084	8.7226	9.3675	32.3992	7.28952	12.2169	9.08675	8.0266	2.49376	5.05939	4.10485	11.5193	7.62853	8.76288	6.70872	8.14168	7.60383	4.0649	23.1497	4.94058
Ma11_t06680.1	Ma11_g06680	-//-	mRNA	32.6948	31.9981	23.6976	24.8507	23.0526	22.3172	23.1766	41.1088	33.5558	18.3507	23.1773	20.2319	27.8288	37.2199	45.29	28.9353	36.5981	30.8137	15.8628	19.0228	20.6745	25.4845	49.2368	25.9105
Ma05_t20100.1	Ma05_g20100	-//-	mRNA	0.390677	0.930597	0.696189	1.85311	1.18822	0.815706	1.0314	1.08855	0.237825	2.67836	1.18436	2.11296	0.541612	0.504894	0.0854082	0.136801	0.677519	0.879792	1.93457	2.28924	3.84372	0.806566	0.757728	1.92988
Ma04_t24550.1	Ma04_g24550	sp|Q9FJH0|RAA1F_ARATH Ras-related protein RABA1f OS=Arabidopsis thaliana GN=RABA1F PE=2 SV=1//1.80665e-137	mRNA	35.1325	31.9924	39.8078	29.4645	37.5437	35.0156	31.8959	32.5334	30.6397	33.5106	36.6861	30.348	33.7586	30.5014	32.511	40.5486	40.4301	39.8312	40.4071	40.1049	31.235	28.0915	34.8377	33.2335
Ma08_t19670.1	Ma08_g19670	sp|C0LGQ5|GSO1_ARATH LRR receptor-like serine/threonine-protein kinase GSO1 OS=Arabidopsis thaliana GN=GSO1 PE=2 SV=1//0	mRNA	1.78823	2.51098	2.7003	4.04872	2.76931	2.34292	3.00156	2.54574	2.7193	2.24303	2.01006	2.58125	1.59089	2.12378	1.91632	3.2389	4.0301	2.16704	3.42994	3.33513	2.98153	2.22086	2.66283	2.53192
Ma02_t21630.1	Ma02_g21630	sp|Q9ZPY7|XPO2_ARATH Exportin-2 OS=Arabidopsis thaliana GN=CAS PE=2 SV=1//2.88804e-149	mRNA	0	0	0	0.0776701	0.0359936	0	0.0354552	0.0308369	0.0272048	0	0	0	0	0	0.0548986	0.0234564	0.0194249	0.0190249	0.044604	0.0206879	0.0352927	0	0.026171	0.0159833
Ma08_t27070.1	Ma08_g27070	sp|O64989|C90B1_ARATH Cytochrome P450 90B1 OS=Arabidopsis thaliana GN=CYP90B1 PE=1 SV=2//3.95877e-179	mRNA	116.906	4.31722	76.0576	17.0704	56.758	79.577	24.8616	2.88359	68.379	38.9271	15.1176	63.2241	62.4211	111.841	118.6	17.1281	61.19	134.4	103.096	84.6344	150.368	23.3993	35.1762	40.4974
Ma11_t20250.1	Ma11_g20250	sp|Q8H183|BUP1_ARATH Beta-ureidopropionase OS=Arabidopsis thaliana GN=PYD3 PE=1 SV=1//0	mRNA	54.7463	59.6761	50.0333	43.0545	45.2383	43.9691	48.0167	40.954	55.4994	38.7545	52.5673	45.3539	54.213	57.7402	60.2339	48.0679	40.0979	40.0859	31.0105	30.5764	32.9726	48.9052	52.3048	42.8031
Ma10_t17350.1	Ma10_g17350	sp|Q9SDQ3|SCL1_ARATH Scarecrow-like protein 1 OS=Arabidopsis thaliana GN=SCL1 PE=2 SV=1//0	mRNA	64.9609	52.4893	47.1303	38.6592	39.2388	42.4384	35.2058	92.2223	47.8057	42.4898	35.9322	28.2194	51.3615	55.4272	62.4989	53.7205	53.1284	33.6969	33.3205	34.8341	27.4841	38.1774	67.814	38.1654
Ma04_t20950.1	Ma04_g20950	sp|Q9SUS5|RHA1B_ARATH E3 ubiquitin-protein ligase RHA1B OS=Arabidopsis thaliana GN=RHA1B PE=2 SV=1//3.01857e-19	mRNA	22.0255	18.1721	15.161	21.8573	53.4352	13.8963	19.3188	25.1392	15.7186	25.9855	31.1634	18.1809	20.2918	14.875	17.3031	11.8145	15.4725	20.188	18.4418	19.266	14.6635	15.3927	15.4674	13.2737
Ma09_t20340.2	Ma09_g20340	sp|F4I460|MYO8_ARATH Myosin-8 OS=Arabidopsis thaliana GN=XI-B PE=3 SV=1//0	mRNA	3.60542	3.67677	3.07864	3.2986	2.36942	3.97196	3.10734	5.52026	4.06884	3.9015	2.8903	3.27234	3.76267	4.05424	4.07083	2.53624	2.52414	2.12804	2.35639	2.93943	3.83039	4.32464	4.39414	2.99935
Ma08_t20090.1	Ma08_g20090	sp|Q9LV16|B3GTJ_ARATH Probable beta-1,3-galactosyltransferase 19 OS=Arabidopsis thaliana GN=B3GALT19 PE=2 SV=2//0	mRNA	4.5766	7.71727	5.13413	13.3408	7.69487	10.7463	4.71506	2.16647	6.50948	6.85473	5.53455	11.1857	6.05891	5.41287	4.7299	8.49177	6.99823	5.24705	11.0913	9.514	8.52649	8.71443	3.02675	8.12581
Ma08_t17930.1	Ma08_g17930	sp|P10795|RBS1A_ARATH Ribulose bisphosphate carboxylase small chain 1A, chloroplastic OS=Arabidopsis thaliana GN=RBCS-1A PE=1 SV=2//9.13152e-09	mRNA	0	0	0	0	0	0	0	0	0	0	0	0	0	0	0	0	0	0	0	0	0	0	0	0
Ma08_t06830.1	Ma08_g06830	sp|O64538|SAU40_ARATH Auxin-responsive protein SAUR40 OS=Arabidopsis thaliana GN=SAUR40 PE=2 SV=1//1.93657e-16	mRNA	0	0.289556	0.417765	0.258225	0.452885	0.496486	0	0	0.655696	0.736702	0.44896	0.971224	0.369995	0	0	0.565942	0.466451	0	0.177163	0.332087	0.553598	0	0	0.270472
Ma05_t19620.1	Ma05_g19620	sp|P33449|BMR1_BACSU Multidrug resistance protein 1 OS=Bacillus subtilis (strain 168) GN=bmr PE=3 SV=2//7.91257e-07	mRNA	13.1774	12.3922	10.3297	10.4635	13.5714	13.0644	9.08249	11.9818	9.42015	10.1548	10.2072	9.48403	13.7876	12.7015	13.8695	18.5928	13.9684	12.4322	11.1834	13.8848	9.54889	9.72201	16.5455	11.3735
Ma09_t21830.1	Ma09_g21830	sp|O04266|SAR1A_BRACM GTP-binding protein SAR1A OS=Brassica campestris GN=SAR1A PE=2 SV=1//5.62292e-110	mRNA	8.96798	13.667	12.5705	7.44049	13.0392	11.0988	8.15309	11.5978	3.75865	6.5122	9.45871	3.26352	5.72923	9.41802	8.97008	19.5693	14.9421	11.5452	9.88518	9.62257	6.41588	5.60328	12.7483	9.08392
Ma03_t27750.1	Ma03_g27750	-//-	mRNA	0	0	0	0	0	0	0	0	0	0	0	0	0	0	0	0	0	0	0	0	0	0	0	0
Ma04_t39550.1	Ma04_g39550	sp|P27518|CB21_GOSHI Chlorophyll a-b binding protein 151, chloroplastic OS=Gossypium hirsutum GN=CAB-151 PE=2 SV=2//4.14091e-177	mRNA	0.393276	0.204094	0.34353	0.368048	0.854908	0.564939	0.10397	0.363327	0.199577	1.67741	1.87715	9.77287	0.229942	0	0.0826503	0.413106	1.08192	2.17013	2.74009	2.48832	1.2345	0.817567	0.229797	0.475623
Ma05_t21990.1	Ma05_g21990	sp|A2XQV4|ETFB_ORYSI Electron transfer flavoprotein subunit beta, mitochondrial OS=Oryza sativa subsp. indica GN=ETFB PE=3 SV=1//3.9632e-141	mRNA	31.3064	30.3231	31.2488	15.1785	22.2815	17.8249	24.0228	81.0936	22.0427	26.2633	23.7212	15.9412	16.6103	19.8876	22.3925	26.565	30.1153	22.0521	19.1496	17.3042	12.0419	11.1648	62.1779	20.4943
Ma07_t23580.1	Ma07_g23580	sp|Q0DHB7|EXPA4_ORYSJ Expansin-A4 OS=Oryza sativa subsp. japonica GN=EXPA4 PE=2 SV=1//9.31394e-124	mRNA	4.49101	85.7132	9.56939	114.374	22.3662	25.2385	95.0456	6.36034	180.47	252.479	183.108	833.971	59.6579	8.53047	9.24634	13.2231	12.6143	6.5034	47.0469	42.2705	168.578	302.574	6.16636	69.629
Ma08_t19890.1	Ma08_g19890	sp|Q38857|XTH22_ARATH Xyloglucan endotransglucosylase/hydrolase protein 22 OS=Arabidopsis thaliana GN=XTH22 PE=1 SV=1//1.75292e-126	mRNA	50.46	38.9992	44.5993	27.7923	147.127	141.941	21.4032	138.437	8.99076	72.8316	63.1873	61.7881	36.6145	44.1204	44.6268	192.136	367.785	37.6223	247.961	220.287	9.54518	6.36894	148.46	140.881
Ma11_t14850.1	Ma11_g14850	sp|Q9LYD3|DREB3_ARATH Dehydration-responsive element-binding protein 3 OS=Arabidopsis thaliana GN=DREB3 PE=2 SV=1//2.48253e-36	mRNA	0.263588	2.75446	1.05974	3.65556	1.22489	1.45735	2.43779	0	0.53499	2.46319	1.94807	3.32613	1.90304	0.671348	0.898316	1.19984	0.533965	4.31836	3.14286	2.03332	1.44282	1.82218	0.205059	3.40339
Ma07_t16990.2	Ma07_g16990	-//-	mRNA	11.8369	15.7524	12.3104	13.2898	12.6142	17.782	12.2984	13.8871	12.6561	11.8741	12.8111	13.3292	8.60341	11.4577	11.8736	14.9208	13.6072	14.9558	16.5193	11.5681	11.9767	11.938	14.3124	13.0832
Ma03_t08520.1	Ma03_g08520	sp|Q8RWQ4|RGAP7_ARATH Rho GTPase-activating protein 7 OS=Arabidopsis thaliana GN=ROPGAP7 PE=2 SV=1//0	mRNA	17.8723	16.024	14.949	22.9726	21.2931	23.3622	15.4774	16.7531	17.9643	15.9972	14.7993	18.8633	20.7991	21.8286	21.025	26.7929	28.5926	22.4297	22.9394	22.4186	23.3775	20.7845	19.8045	19.9221
Ma07_t16990.1	Ma07_g16990	-//-	mRNA	1.3222	3.66763	3.97486	2.86997	4.65105	3.8548	2.16169	3.14754	1.08757	3.70624	4.82696	3.92214	1.27316	1.6403	1.04502	3.9752	2.1685	3.37425	1.35973	2.57548	1.77251	1.59691	4.35205	2.37201
Ma03_t04920.1	Ma03_g04920	sp|Q9LTW9|FLA14_ARATH Fasciclin-like arabinogalactan protein 14 OS=Arabidopsis thaliana GN=FLA14 PE=2 SV=1//6.33979e-26	mRNA	0.0446401	0.0574227	0	0.0519134	0.0902919	0.157769	0.118086	0.0514311	0.0453144	0.0307563	0	0.08621	0.104962	0.111744	0.0691881	0	0.0323442	0.158268	0.296864	0.275649	0.0879765	0.0258566	0.0435536	0.0267508
Ma05_t05080.1	Ma05_g05080	sp|O82155|DOF17_ARATH Dof zinc finger protein DOF1.7 OS=Arabidopsis thaliana GN=DOF1.7 PE=2 SV=1//4.50272e-24	mRNA	3.1247	2.50203	2.11999	2.69248	2.18556	1.60458	5.02052	3.09373	1.76215	2.8065	3.8973	6.01961	4.24388	2.26068	2.24993	2.958	1.37513	3.51186	6.57957	7.57487	5.71593	4.50397	2.4387	4.19066
Ma07_t10520.1	Ma07_g10520	sp|P51110|DFRA_VITVI Dihydroflavonol-4-reductase OS=Vitis vinifera GN=DFR PE=1 SV=1//1.23258e-19	mRNA	0.0846132	1.42925	1.21608	1.88261	2.93532	0.0609454	0.0559167	1.36853	0.472315	1.57122	0.692895	0	0.988516	0.964008	0	4.29587	0.551226	0.598351	0.210465	6.92011	3.04094	0.586018	0	0.666205
Ma02_t00360.1	Ma02_g00360	sp|Q5CZL1|GDAP2_XENTR Ganglioside-induced differentiation-associated protein 2 OS=Xenopus tropicalis PE=2 SV=1//4.26422e-16	mRNA	39.7582	45.0814	50.5792	45.1983	49.9535	56.608	38.7126	46.7848	31.7335	39.3022	38.8864	40.9429	36.6647	43.1873	40.6068	48.7366	43.398	40.5806	43.9768	44.0782	34.9775	37.5694	45.3264	41.6535
Ma04_t23550.5	Ma04_g23550	sp|Q5VSA8|BBRD_ORYSJ Barley B recombinant-like protein D OS=Oryza sativa subsp. japonica GN=Os06g0130600 PE=2 SV=1//3.23781e-116	mRNA	4.99465e-07	1.02168	0.549761	1.38983	1.36732	1.36575	0.69071	1.77427	0.323859	1.47467	0.538097	2.04632	0.409715	1.70282	1.23751	1.52228	1.53668	1.72691e-11	1.50337	0.874398	0.999964	0.680553	1.16088	2.22251
Ma06_t06160.1	Ma06_g06160	sp|Q02921|NO93_SOYBN Early nodulin-93 OS=Glycine max PE=2 SV=1//1.70969e-32	mRNA	0.398644	2.74547	0.304701	0.189197	0.55151	0.833647	0.947133	0	2.91206	0	0	0.513348	0.920638	4.22848	2.44423	0	0.115214	0.224385	5.13142	4.05701	0.30951	0.731361	0	0.985476
Ma09_t27350.1	Ma09_g27350	-//-	mRNA	0	0	0	0	1.26838	1.74554	0	0	0	0	0	0	0	0	2.46697	0	0	1.87178	0	0	0	0	1.37723	0
Ma11_t22730.1	Ma11_g22730	sp|Q8LF20|CAP2_ARATH Putative clathrin assembly protein At2g25430 OS=Arabidopsis thaliana GN=At2g25430 PE=1 SV=2//0	mRNA	3.83649	3.26607	3.18109	4.13401	4.1837	4.50879	3.62531	1.52161	2.60189	3.57818	4.17301	3.81862	3.24699	2.99566	3.62563	4.00719	3.83207	4.46154	5.06921	5.22638	4.73077	3.14069	1.95151	3.87055
Ma03_t13550.1	Ma03_g13550	sp|Q9XSC3|WDR44_BOVIN WD repeat-containing protein 44 OS=Bos taurus GN=WDR44 PE=1 SV=1//2.10468e-47	mRNA	0.531535	4.05389e-05	2.14722	0.000317472	3.99144e-05	0.00387173	1.99624e-05	4.18495e-05	0.244037	0.000108968	2.23754e-05	0.000104685	3.41836e-05	0.510481	0.29636	1.60524e-05	7.92474e-05	3.49353e-05	0.000116406	5.73014e-05	0.610625	0.261038	0.344433	0.000269888
Ma10_t00730.1	Ma10_g00730	-//-	mRNA	0	0	0	0	0	0	0	0	0	0	0	0	0	0	0	0	0	0	0	0	0	0	0	0
Ma07_t02400.1	Ma07_g02400	sp|Q8GUU2|RIE1_ARATH E3 ubiquitin protein ligase RIE1 OS=Arabidopsis thaliana GN=RIE1 PE=2 SV=1//5.06906e-104	mRNA	13.4999	19.5278	24.0103	24.3823	31.8348	33.7755	15.8814	13.9677	12.8881	16.292	18.3306	25.0368	15.4631	13.3094	13.0558	23.6337	17.9986	20.1527	22.9385	22.5057	20.7198	13.4033	15.6791	18.9929
Ma07_t23220.1	Ma07_g23220	sp|Q93Z27|CML45_ARATH Probable calcium-binding protein CML45 OS=Arabidopsis thaliana GN=CML45 PE=1 SV=1//1.9559e-20	mRNA	1.48283	0.284385	5.47073	1.01475	1.03798	0	0.279333	0.493685	2.68586	0.289739	0.147047	0	6.18693	7.65218	9.29771	0.927263	0.152865	0	0.174205	0.326477	0.272243	0.725318	8.39731	1.19532
Ma07_t17260.1	Ma07_g17260	sp|Q69LE7|PNP1_ORYSJ Probable polyribonucleotide nucleotidyltransferase 1, chloroplastic OS=Oryza sativa subsp. japonica GN=PNP1 PE=2 SV=1//0	mRNA	2.09932	3.01843	2.7188	5.5228	5.26506	5.62908	3.95607	3.96653	3.27304	4.46057	4.67886	5.68292	3.67302	3.64482	3.73889	4.77433	7.17528	7.81556	5.71232	5.67282	5.75799	4.59227	4.66994	4.32852
Ma06_t06170.1	Ma06_g06170	-//-	mRNA	65.4861	27.8504	180.124	212.686	510.969	662.995	205.052	8.89915	311.968	107.645	115.762	376.546	782.438	362.09	544.219	163.856	48.2428	90.0517	613.406	516.746	268.771	251.573	42.2663	535.218
Ma09_t07610.1	Ma09_g07610	sp|P42813|RNS1_ARATH Ribonuclease 1 OS=Arabidopsis thaliana GN=RNS1 PE=1 SV=1//6.08287e-30	mRNA	93.7383	62.2938	75.9141	137.274	141.242	159.266	87.744	28.5761	106.247	175.203	75.7058	190.52	122.454	61.2977	74.4754	41.3925	47.3851	62.9168	193.836	167.07	189.312	73.5062	32.9192	132.584
Ma05_t02370.1	Ma05_g02370	sp|Q653U3|ARFQ_ORYSJ Auxin response factor 17 OS=Oryza sativa subsp. japonica GN=ARF17 PE=2 SV=1//1.56528e-72	mRNA	2.27435	1.58481	2.63468	5.05309	2.39002	3.11889	2.86145	1.33151	2.30264	3.5544	1.95407	6.70879	2.46441	1.64013	3.15307	1.08461	4.05728	3.74786	6.16156	3.1665	7.76954	4.70795	2.12142	2.59395
Ma10_t09690.1	Ma10_g09690	-//-	mRNA	0	0	0	0	0	0	0	0	0	0	0	0	0	0	0	0	0	0	0	0	0	0	0	0
Ma09_t25830.11	Ma09_g25830	sp|O04940|CDS1_SOLTU Phosphatidate cytidylyltransferase 1 OS=Solanum tuberosum GN=CDS1 PE=1 SV=1//0	mRNA	5.08969	1.93247	1.58304	1.50923	2.14285	1.85433	1.62171	1.27751	1.54711	1.44063	1.44612	1.71562	5.12853	2.06253	2.43139	1.88739	2.35145	1.89581	1.72191	2.27522	1.42489	2.29402	1.23815	1.938
Ma09_t25830.10	Ma09_g25830	sp|O04940|CDS1_SOLTU Phosphatidate cytidylyltransferase 1 OS=Solanum tuberosum GN=CDS1 PE=1 SV=1//0	mRNA	0.577866	0.228332	0.40673	0.296504	0.535868	0.837779	0.36384	0.43891	0.237672	0.400343	0.224275	0.278903	0.68107	0.378516	0.923233	0.940411	0.456097	0.217522	0.18248	0.180776	0.0846507	0.291314	0.497967	0.32597
Ma09_t25830.13	Ma09_g25830	sp|O04940|CDS1_SOLTU Phosphatidate cytidylyltransferase 1 OS=Solanum tuberosum GN=CDS1 PE=1 SV=1//0	mRNA	0.476511	0.712359	1.31937	0.379211	0.200675	0.582985	1.34584	0.431595	0.642303	0.511973	0.616597	0.944652	0.390882	0.392209	0.645004	0.387429	0.772152	0.169289	0.124902	0.377355	0.582285	0.330887	0.635034	0.357676
Ma09_t25830.12	Ma09_g25830	sp|O04940|CDS1_SOLTU Phosphatidate cytidylyltransferase 1 OS=Solanum tuberosum GN=CDS1 PE=1 SV=1//0	mRNA	0.301315	0.0564337	6.04816e-14	6.31759e-08	4.15619e-16	1.36878e-07	3.11449e-11	2.04421e-22	0.050768	0.0627147	0.0607088	0.167089	0.0645301	2.77582e-08	1.8556e-14	1.72781e-13	2.31817e-10	0.19913	0.0881341	0.0789646	0.0716125	1.34736e-19	0.0832158	0.0593249
Ma09_t25830.15	Ma09_g25830	sp|O04940|CDS1_SOLTU Phosphatidate cytidylyltransferase 1 OS=Solanum tuberosum GN=CDS1 PE=1 SV=1//0	mRNA	0.8758	0.993821	0.733686	0.97314	0.695545	1.21611	0.629471	0.319219	1.03187	0.918367	0.94612	0.685826	0.663614	1.01191	0.878063	0.467492	1.17236	0.692458	0.600156	0.777198	0.591756	1.15821	0.898174	0.69716
Ma09_t25830.14	Ma09_g25830	sp|O04940|CDS1_SOLTU Phosphatidate cytidylyltransferase 1 OS=Solanum tuberosum GN=CDS1 PE=1 SV=1//0	mRNA	0.234143	0.406729	6.13896e-10	0.0841748	0.216821	0.257379	0.319679	0.183627	1.05158e-08	0.0862938	0.22515	0.395096	1.45484e-11	0.320953	0.255085	0.373232	0.218626	0.219375	0.0918746	0.315236	0.21092	0.092663	0.353039	1.61418e-16
Ma04_t06420.1	Ma04_g06420	sp|Q9FJZ9|PER72_ARATH Peroxidase 72 OS=Arabidopsis thaliana GN=PER72 PE=1 SV=1//3.81161e-161	mRNA	96.6618	53.2492	81.2848	81.3959	89.0465	84.9352	141.767	99.7654	117.875	68.2128	67.2896	43.0512	81.5236	59.5817	57.7324	75.5999	73.9369	30.6577	76.2167	74.8354	43.1519	51.5366	99.2089	108.478
Ma04_t04730.1	Ma04_g04730	sp|P93101|CDC2_OXYRB Cell division control protein 2 homolog OS=Oxybasis rubra GN=CDC2 PE=2 SV=1//6.50019e-166	mRNA	0.179419	0.175073	0	0.210292	0.305457	0.19432	0.0592794	0.207352	0.0910459	0	0.183782	0.231018	0.104722	0.170594	0	0.0785283	0.194785	0	0.0743562	0.0692129	0.292902	0	0	0.217629
Ma10_t30760.2	Ma10_g30760	-//-	mRNA	1.3251	0.000115319	0.396157	0.22573	1.07588	0.000272456	0.734224	1.92443	0.736565	0.927918	0.243429	1.22603	1.39174	0.425205	0.782545	0.830393	0.804259	0.606085	1.18468	0.306145	0.491602	0.140932	1.11031	0.621726
Ma05_t05410.1	Ma05_g05410	-//-	mRNA	44.4113	26.1382	20.6884	16.5413	23.2912	20.0597	15.8022	29.4513	14.3734	18.9125	25.1155	16.0667	40.4696	32.9213	49.5865	25.3441	21.5236	24.9609	22.6903	21.1522	13.7234	18.1096	32.2393	22.3742
Ma08_t02910.1	Ma08_g02910	sp|Q9ZSD4|SY121_ARATH Syntaxin-121 OS=Arabidopsis thaliana GN=SYP121 PE=1 SV=1//1.53867e-107	mRNA	2.07159	2.02768	5.33879	3.27805	4.67696	3.53366	2.24438	1.45426	2.46344	1.76753	2.1413	2.4131	3.36601	4.36436	4.94122	3.24669	2.85937	2.29514	3.44526	3.5941	3.29434	2.78967	1.80994	3.23506
Ma08_t03770.1	Ma08_g03770	-//-	mRNA	0.214083	0.564639	0.362066	0.590945	0.393413	1.26866	0.188441	0.827712	0.362031	0.19581	0.687087	0.275676	0.495698	0.275584	0.232378	0.374816	0.722145	0.301593	0.471569	0.22011	1.38819	0.245841	0.415525	0.526824
Ma10_t09360.1	Ma10_g09360	sp|Q9ZQR4|Y2452_ARATH DUF21 domain-containing protein At2g14520 OS=Arabidopsis thaliana GN=CBSDUF3 PE=2 SV=2//0	mRNA	0.568368	0.000402515	0.0422861	1.16873	0.000623113	2.96648	0.0116033	0.000686054	0.805617	1.9652	0.10387	2.56238	1.4099	1.23255	0.553032	0.000872582	1.96441	3.63935e-05	2.05373	0.666831	0.538062	0.000736309	0.000590014	1.13414
Ma09_t07600.1	Ma09_g07600	sp|P42815|RNS3_ARATH Ribonuclease 3 OS=Arabidopsis thaliana GN=RNS3 PE=2 SV=1//1.94756e-25	mRNA	2.27602	8.395	0.498428	10.6056	8.41106	8.72361	3.43071	1.199	2.75582	13.6791	5.66418	11.6192	2.14747	0.50479	0.629752	3.42539	0.925017	0.564922	4.17278	4.6831	1.98424	2.49001	0.233302	3.13992
Ma07_t05530.1	Ma07_g05530	sp|Q9LT71|RTNLK_ARATH Reticulon-like protein B11 OS=Arabidopsis thaliana GN=RTNLB11 PE=2 SV=1//6.57505e-56	mRNA	11.7137	11.8248	12.1632	14.0123	11.2344	14.1406	9.30041	6.13334	10.349	12.3453	11.9036	12.4239	9.25499	10.4002	10.878	12.2454	12.4441	11.323	12.3675	13.3942	11.3442	11.8679	8.2043	10.5132
Ma04_t13050.1	Ma04_g13050	sp|Q38950|2AAB_ARATH Serine/threonine-protein phosphatase 2A 65 kDa regulatory subunit A beta isoform OS=Arabidopsis thaliana GN=PP2AA2 PE=1 SV=2//0	mRNA	33.2149	45.6708	45.7866	33.6234	33.0155	36.8798	39.9303	47.4298	39.1188	34.777	39.1741	33.6637	30.7241	41.176	38.2734	38.9216	34.4172	30.183	27.177	27.1984	33.3994	35.0277	43.5061	37.8342
Ma06_t14180.1	Ma06_g14180	sp|Q6YM50|MAN5_SOLLC Mannan endo-1,4-beta-mannosidase 5 OS=Solanum lycopersicum GN=MAN5 PE=2 SV=1//1.43786e-164	mRNA	0	0	0	0	0	0	0	0	0	0	0	0	0	0	0	0	0	0	0	0	0	0	0	0
Ma04_t09200.4	Ma04_g09200	sp|Q6K9C3|RZP23_ORYSJ Serine/arginine-rich splicing factor RSZ23 OS=Oryza sativa subsp. japonica GN=RSZ23 PE=2 SV=1//4.4246e-32	mRNA	12.7565	16.7411	10.4184	17.0018	16.1495	17.675	13.0874	18.4211	14.0401	12.2495	13.7381	15.8133	14.1611	15.8071	16.5732	26.1574	35.8731	26.3527	13.5282	16.1925	18.8911	19.3101	32.4172	22.0759
Ma04_t09200.3	Ma04_g09200	sp|Q6K9C3|RZP23_ORYSJ Serine/arginine-rich splicing factor RSZ23 OS=Oryza sativa subsp. japonica GN=RSZ23 PE=2 SV=1//4.4246e-32	mRNA	18.1724	33.5637	29.4179	45.8229	43.3431	44.6542	19.5952	21.2713	13.8235	26.7943	31.3189	34.3347	26.6889	25.0115	22.2626	54.8833	55.5808	45.7569	66.2685	50.5941	32.7476	32.8328	26.1179	38.0632
Ma04_t13990.1	Ma04_g13990	sp|Q8GXR2|PLT6_ARATH Probable polyol transporter 6 OS=Arabidopsis thaliana GN=PLT6 PE=2 SV=2//0	mRNA	0.0504755	0.130048	0	0	0.136302	0.286207	0	1.16355	0.0512365	0.347678	0	0	0.0889301	0.0316399	0.0261523	0	0.146268	0.107331	0.125829	0.116874	0.0331331	0	0.147694	0.0605888
Ma04_t09200.1	Ma04_g09200	sp|Q6K9C3|RZP23_ORYSJ Serine/arginine-rich splicing factor RSZ23 OS=Oryza sativa subsp. japonica GN=RSZ23 PE=2 SV=1//4.4246e-32	mRNA	6.6308	4.99967	2.70636	3.4693	2.25398	1.32897	4.91308	2.20942	4.85884	3.7125	3.70385	3.86023	2.52268	5.04122	4.30126	4.77938	5.60596	3.82874	5.65193	8.78831	3.65852	5.16908	4.42169	6.08439
Ma11_t05790.1	Ma11_g05790	-//-	mRNA	3.41545	4.54895	1.96892	1.63584	1.18956	0.338589	2.82937	13.9404	2.34977	5.72521	1.34874	1.19265	2.15364	0.887282	0.557785	2.33104	3.01473	1.38892	1.53283	1.60743	0.527394	1.06618	2.58805	0.989948
Ma02_t02420.1	Ma02_g02420	sp|B9DFG5|PTI13_ARATH PTI1-like tyrosine-protein kinase 3 OS=Arabidopsis thaliana GN=PTI13 PE=1 SV=1//0	mRNA	40.2306	39.8912	34.2855	35.9931	40.1787	42.0833	21.6809	28.731	29.2431	26.278	32.7267	29.6607	51.6164	45.6554	47.5775	59.4268	51.4968	61.1169	41.4949	47.6878	49.2856	43.0448	33.2244	37.6667
Ma05_t02310.1	Ma05_g02310	sp|O22466|MSI1_SOLLC WD-40 repeat-containing protein MSI1 OS=Solanum lycopersicum GN=MSI1 PE=2 SV=1//0	mRNA	1.19966	0.941095	0.614215	0.728835	0.810177	0.739965	1.06917	1.26262	0.794175	1.00589	1.13411	1.0409	0.673726	0.850479	1.19006	0.639189	0.566777	1.40471	0.736732	0.684364	0.616148	0.90574	1.72953	0.657694
Ma04_t13040.1	Ma04_g13040	sp|Q8S8A0|GDU4_ARATH Protein GLUTAMINE DUMPER 4 OS=Arabidopsis thaliana GN=GDU4 PE=2 SV=1//2.19606e-10	mRNA	0.875418	12.2126	0	0	1.39702	0.89784	2.29005	0	2.66648	1.1715	1.31672	6.70021	4.60886	1.35009	1.30328	16.8342	2.47245	1.7452	0	3.98385	2.07443	0.946449	0.823587	14.9492
Ma06_t09470.2	Ma06_g09470	sp|Q9C533|ZDHC1_ARATH Probable protein S-acyltransferase 22 OS=Arabidopsis thaliana GN=PAT22 PE=2 SV=2//0	mRNA	2.35656	3.02312	1.74215	4.42278	3.30318	4.74628	0.00276516	0.720084	2.18626	3.98756	0.0104358	7.8276	3.29851	2.91107	2.59102	2.31914	0.900559	4.7969	7.12583	3.43812	8.49811	5.58953	1.59005	3.49066
Ma04_t14980.1	Ma04_g14980	-//-	mRNA	0	0	0	0	0	0	0	0	0	0	0	0	0	0	0	0	0	0	0	0	0	0	0	0
Ma04_t31980.1	Ma04_g31980	sp|B6SFA4|MAA3_ARATH Probable helicase MAGATAMA 3 OS=Arabidopsis thaliana GN=MAA3 PE=2 SV=1//2.92444e-49	mRNA	98.2852	55.1959	142.406	53.9986	67.8223	92.0261	53.4348	24.0197	96.0087	23.8636	44.5484	49.5787	136.816	171.545	194.286	50.0151	23.1574	34.1238	24.5113	26.2929	32.902	113.436	58.6343	58.1388
Ma08_t24820.1	Ma08_g24820	sp|Q9MAC5|PTBP1_ARATH Polypyrimidine tract-binding protein homolog 1 OS=Arabidopsis thaliana GN=PTB PE=1 SV=1//6.13726e-70	mRNA	30.3579	26.8635	28.4331	31.8861	30.537	38.7231	22.451	25.9014	27.2491	22.201	23.1235	25.9922	36.1637	28.4533	33.2959	37.1918	36.104	28.9691	35.8541	31.3737	28.5287	30.6943	26.826	36.2485
Ma01_t06070.1	Ma01_g06070	sp|Q5RKH1|PRP4B_RAT Serine/threonine-protein kinase PRP4 homolog OS=Rattus norvegicus GN=Prpf4b PE=1 SV=1//8.36651e-128	mRNA	20.3359	16.7405	16.0678	18.8994	20.4494	24.2442	15.9528	32.8476	19.429	19.2921	17.4306	18.9078	27.434	26.8073	28.3513	28.2657	29.9062	19.5601	21.203	21.5233	17.2384	20.4024	31.4113	20.1705
Ma09_t12670.1	Ma09_g12670	sp|Q6Z4T5|POLIA_ORYSJ DNA polymerase I A, chloroplastic OS=Oryza sativa subsp. japonica GN=Os08g0175300 PE=2 SV=1//8.32014e-64	mRNA	3.5862	7.18065	5.79961	7.91194	5.59868	6.03369	8.5155	1.56913	5.16954	6.10536	8.24274	6.87947	4.11641	6.4027	4.75964	5.52477	5.06797	9.10907	6.53234	5.73039	8.16094	7.77489	1.82031	5.85331
Ma04_t11880.1	Ma04_g11880	-//-	mRNA	8.78111	8.3059	13.5572	13.5185	16.5082	18.1197	7.8284	9.15103	6.80013	8.89966	10.4233	11.5511	7.78542	8.62051	8.35122	11.5446	11.7972	9.97411	14.8105	13.5302	9.93149	8.83336	6.91183	11.0568
Ma03_t30100.3	Ma03_g30100	sp|B9FJG3|RSLE1_ORYSJ Zinc finger BED domain-containing protein RICESLEEPER 1 OS=Oryza sativa subsp. japonica GN=Os05g0239150 PE=3 SV=1//1.79543e-117	mRNA	5.88681	4.92522	6.4389	5.19103	6.22614	6.79256	6.20402	7.68804	6.5694	3.93329	4.60253	5.13915	4.53973	6.05632	4.93729	4.47923	5.33299	5.37551	4.91267	4.33155	5.15932	4.40346	6.56838	4.7964
Ma04_t12780.1	Ma04_g12780	sp|Q9LRI7|OSR8_ORYSJ Hydrophobic protein OSR8 OS=Oryza sativa subsp. japonica GN=OSR8 PE=3 SV=1//2.719e-29	mRNA	8.64467	5.64661	31.8007	10.9905	25.2325	33.1778	4.22927	35.6547	8.72047	12.6291	3.49879	9.13814	3.14581	1.84073	11.4981	38.4323	27.024	18.2015	11.0558	10.8527	12.5746	9.61698	13.8805	26.9111
Ma08_t12660.1	Ma08_g12660	sp|Q9LX14|UFC_ARATH Protein UPSTREAM OF FLC OS=Arabidopsis thaliana GN=UFC PE=2 SV=1//1.20256e-06	mRNA	0.0209871	0	0.103793	0.219558	0.282833	0.503752	0.111039	0	0.149131	0.115692	0.113928	0.189143	0.148103	0.0262478	0.0433142	0.110223	0.182488	0.0595372	0.279184	0.323993	0.386176	0.194546	0.0409585	0.301626
Ma09_t03110.1	Ma09_g03110	sp|Q94BT9|ATOX1_ARATH Copper transport protein ATX1 OS=Arabidopsis thaliana GN=ATX1 PE=1 SV=1//1.46524e-12	mRNA	21.2306	15.1005	17.643	24.2652	25.3494	25.3256	17.9552	5.92195	17.0276	23.1432	27.6769	30.6078	25.3599	14.8278	14.3272	23.9066	19.3672	40.0492	22.9967	26.2984	31.7525	20.4508	8.99777	24.742
Ma05_t15860.1	Ma05_g15860	-//-	mRNA	10.2426	9.07929	10.8581	7.45539	8.52217	8.43144	8.55706	14.8008	8.35244	8.72565	7.63978	6.24113	9.24851	9.22566	9.97387	8.76206	7.37779	6.95277	6.46514	6.65285	4.34878	8.04165	12.0231	7.645
Ma04_t35650.1	Ma04_g35650	sp|Q9XGN1|TTG1_ARATH Protein TRANSPARENT TESTA GLABRA 1 OS=Arabidopsis thaliana GN=TTG1 PE=1 SV=1//3.27253e-152	mRNA	6.43477	3.62982	3.77948	2.3169	3.07131	1.79604	3.62267	5.0044	3.46262	3.95148	3.33607	2.99449	3.58105	3.17609	4.23358	4.34318	3.07026	3.1503	3.09201	3.07161	2.37451	2.54305	4.53668	2.79272
Ma08_t31860.1	Ma08_g31860	sp|Q6ET36|CPS1_ORYSJ Ent-copalyl diphosphate synthase 1, chloroplastic OS=Oryza sativa subsp. japonica GN=CPS1 PE=2 SV=1//0	mRNA	0.0137343	0.211096	0	0.0636987	0.0369	0.0192617	0.127198	0	0.195199	0.0568197	0.0930165	0.0707283	0.0809526	0.0513207	0.0703639	0.0721306	0.0199108	0.0390005	0.114296	0.106028	0.144691	0.159349	0.0536501	0.13109
Ma04_t06380.5	Ma04_g06380	sp|Q94C11|SUGP1_ARATH SURP and G-patch domain-containing protein 1-like protein OS=Arabidopsis thaliana GN=At3g52120 PE=2 SV=1//2.4396e-157	mRNA	13.6763	11.1454	8.42592	11.7115	9.17689	15.4036	11.6595	13.0547	10.725	13.0174	7.97721	10.3338	11.1409	11.9659	15.238	18.6547	19.6996	16.6374	10.517	10.9784	10.2453	16.1858	17.4462	15.1255
Ma04_t06380.4	Ma04_g06380	sp|Q94C11|SUGP1_ARATH SURP and G-patch domain-containing protein 1-like protein OS=Arabidopsis thaliana GN=At3g52120 PE=2 SV=1//2.4396e-157	mRNA	10.0715	9.02774	8.19401	3.87567	7.67792	6.66952	8.13976	10.4136	7.69915	6.49526	8.27191	6.60971	9.46033	11.3235	9.09177	12.6921	9.22701	6.55788	6.70739	7.70605	6.26421	7.57666	7.47656	10.2682
Ma04_t06380.3	Ma04_g06380	sp|Q94C11|SUGP1_ARATH SURP and G-patch domain-containing protein 1-like protein OS=Arabidopsis thaliana GN=At3g52120 PE=2 SV=1//2.4396e-157	mRNA	3.49012	3.29976	0.724464	2.40629	3.4386	3.14461	4.08208	3.3123	5.76833	3.01554	3.38732	1.57056	2.37436	4.47011	7.6815	3.8658	3.41793	2.86762	2.73636	1.71079	2.46188	4.19588	5.9101	2.96987
Ma04_t06380.2	Ma04_g06380	sp|Q94C11|SUGP1_ARATH SURP and G-patch domain-containing protein 1-like protein OS=Arabidopsis thaliana GN=At3g52120 PE=2 SV=1//2.4396e-157	mRNA	27.6096	30.5433	29.9714	25.6322	27.9951	21.9977	23.4693	55.3554	30.7005	21.3233	27.8206	26.3209	25.1503	29.1321	26.1253	28.2962	37.0262	35.028	20.5626	20.8863	28.4627	27.489	44.2047	24.6891
Ma04_t06380.1	Ma04_g06380	sp|Q94C11|SUGP1_ARATH SURP and G-patch domain-containing protein 1-like protein OS=Arabidopsis thaliana GN=At3g52120 PE=2 SV=1//2.4396e-157	mRNA	5.06035	6.0008	1.88785	2.50629	4.07156	2.40073	2.44564	3.20432	1.55031	2.58309	2.04264	1.35882	5.52089	3.11987	5.87881	2.65625	3.12893	4.35791	3.3927	3.21775	1.72368	2.26915	2.40092	2.68351
Ma09_t04750.1	Ma09_g04750	sp|Q9LY03|IRK_ARATH Probable LRR receptor-like serine/threonine-protein kinase IRK OS=Arabidopsis thaliana GN=IRK PE=1 SV=1//0	mRNA	0.148093	0.28526	0.681107	0.687961	0.398451	1.12731	1.49201	0.0240382	1.05015	0.925928	0.77774	1.63402	0.70187	0.518677	0.501598	0.256429	0.645923	0.667835	2.03563	1.50038	2.86297	1.9044	0.0816627	1.50789
Ma08_t13790.1	Ma08_g13790	sp|Q6ZHC8|P2C25_ORYSJ Probable protein phosphatase 2C 25 OS=Oryza sativa subsp. japonica GN=Os02g0685600 PE=2 SV=1//0	mRNA	23.6298	21.189	23.3991	20.6243	24.5039	24.2532	23.5301	36.5681	21.6158	21.6083	21.8982	21.6002	19.0787	22.021	19.7547	22.7945	24.1241	24.1423	21.0902	21.7444	21.9579	19.542	32.7262	22.9125
Ma05_t02960.1	Ma05_g02960	sp|Q9SF40|RL4A_ARATH 60S ribosomal protein L4-1 OS=Arabidopsis thaliana GN=RPL4A PE=2 SV=1//0	mRNA	40.2587	33.3559	26.2404	17.424	19.2709	16.4751	68.7744	25.83	31.3485	40.6268	48.8951	37.8384	29.6437	29.8459	27.6123	14.7001	14.7037	35.6713	30.2194	30.8535	42.466	33.7862	29.3916	34.3595
Ma01_t14660.1	Ma01_g14660	-//-	mRNA	2.90106	5.02739	1.62826	7.92503	4.23876	3.15824	2.79115	0.801089	2.99785	5.26581	3.3573	5.88058	5.91021	1.06371	2.30407	4.29684	4.86658	4.35044	3.79402	6.46883	4.89306	5.45858	0.898611	3.31268
Ma01_t14660.2	Ma01_g14660	-//-	mRNA	1.52662	1.91899	1.84052	2.68178	1.61505	1.4797	1.70285	0.342421	2.48618	0.834667	1.30717	3.24143	1.05612	1.2011	1.39682	0.638656	1.28813	1.29175	2.0099	1.93298	2.14895	2.44998	0.44405	2.75531
Ma08_t19190.1	Ma08_g19190	sp|P0C129|IAA27_ORYSJ Auxin-responsive protein IAA27 OS=Oryza sativa subsp. japonica GN=IAA27 PE=2 SV=2//2.1881e-24	mRNA	0	0	0	0	0	0	0	0	0	0	0	0	0	0	0	0	0	0	0	0	0.188999	0	0	0
Ma01_t21480.1	Ma01_g21480	sp|Q9ZT82|CALSC_ARATH Callose synthase 12 OS=Arabidopsis thaliana GN=CALS12 PE=2 SV=1//0	mRNA	4.00195	3.92556	4.22015	6.57377	6.72199	5.95869	5.03294	3.97801	3.75727	5.14967	5.90506	4.58039	4.79092	5.34025	4.09759	6.32667	7.22555	6.34905	6.90642	7.59892	7.02735	5.45117	4.51064	4.26809
Ma05_t09280.1	Ma05_g09280	sp|Q9SSM3|JAL19_ARATH Jacalin-related lectin 19 OS=Arabidopsis thaliana GN=JAL19 PE=2 SV=1//2.08412e-65	mRNA	2.09732	1.91435	1.35672	2.27135	1.21341	2.50949	5.54475	2.60124	5.36111	7.85575	6.46112	9.90153	2.77089	1.86464	2.20277	0.679959	1.18098	2.85776	3.35058	3.11676	5.43615	5.02435	1.28608	6.57432
Ma05_t02360.3	Ma05_g02360	sp|Q9S9Q9|Y1044_ARATH BTB/POZ domain-containing protein At1g30440 OS=Arabidopsis thaliana GN=At1g30440 PE=1 SV=2//0	mRNA	0.569255	0.863461	0.753129	0.82293	1.52965	1.84805	0.413121	0.914966	1.23515	0.880712	1.11016	2.02461	1.11515	1.42252	0.717763	0.60555	0.743517	1.36833	1.25833	0.245891	2.12956	1.20325	1.55045	1.37252
Ma09_t04740.1	Ma09_g04740	sp|Q9SPL4|AMP22_MACIN Vicilin-like antimicrobial peptides 2-2 OS=Macadamia integrifolia GN=AMP2-2 PE=2 SV=1//4.2921e-37	mRNA	0.135364	0.0698161	0.1343	0.315356	0.146331	0.0384431	0.0716031	0	0	0	0.184002	0.0348562	0.0953409	0.169878	0.140522	0.0473953	0.0392223	0.115107	0.134946	0.125367	0.284198	0.250685	0	0.227701
Ma01_t17760.1	Ma01_g17760	sp|Q43847|SSY2_SOLTU Granule-bound starch synthase 2, chloroplastic/amyloplastic OS=Solanum tuberosum GN=SS2 PE=1 SV=3//7.2819e-43	mRNA	0	0	0	0	0	0	0	0	0	0	0	0	0	0	0	0	0	0	0	0	0	0	0	0
Ma06_t20780.1	Ma06_g20780	sp|Q766C2|NEP2_NEPGR Aspartic proteinase nepenthesin-2 OS=Nepenthes gracilis GN=nep2 PE=1 SV=1//3.17682e-42	mRNA	0.0887105	0.285261	0.109747	0.154739	0.119613	0.125393	0.469332	0.0511019	0.585329	0.275044	0.21075	0.513959	0.547559	0.30531	0.160386	0.0388253	0.0642761	0.0943565	0.110616	0.136945	0.582789	0.359691	0.389487	0.398671
Ma05_t02360.1	Ma05_g02360	sp|Q9S9Q9|Y1044_ARATH BTB/POZ domain-containing protein At1g30440 OS=Arabidopsis thaliana GN=At1g30440 PE=1 SV=2//0	mRNA	1.37571	2.08284	2.06732	1.65569	1.1972	2.42465	2.55412	1.49542	1.80113	2.82047	1.08548	3.92157	0.73122	1.14725	1.34317	0.433186	1.1887	0.870013	3.27245	2.18976	4.54876	2.33243	0.745543	2.98406
Ma07_t11070.1	Ma07_g11070	sp|Q9SCX8|PPA17_ARATH Purple acid phosphatase 17 OS=Arabidopsis thaliana GN=PAP17 PE=2 SV=1//1.60855e-133	mRNA	0.823667	13.0198	2.79595	14.156	4.2895	5.60229	7.5815	1.90037	8.52115	17.2287	8.27809	20.3941	5.6444	1.91333	2.3456	10.8703	12.481	6.64071	10.9418	13.8374	18.7249	11.9805	2.03788	15.3391
Ma07_t01490.2	Ma07_g01490	sp|P26357|TBP_SOLTU TATA-box-binding protein OS=Solanum tuberosum GN=TBP PE=2 SV=1//2.55521e-132	mRNA	11.192	12.251	15.6274	10.034	11.9517	15.8975	12.6807	8.12299	13.5964	10.1352	9.48401	11.9829	10.6163	12.756	12.9947	9.0436	6.23878	6.48904	8.9756	7.19187	10.4539	11.7229	6.3883	10.9248
Ma05_t25520.1	Ma05_g25520	-//-	mRNA	0.0370452	0	0.184697	0.303111	0.201119	0.318601	0.293831	0.171067	0.112799	0.15294	0.100979	0.429277	0.130052	0.046755	0.194192	0.259419	0.214576	0.104862	0.245888	0.343026	0.33937	0.256811	0.288685	0.268484
Ma01_t13360.1	Ma01_g13360	sp|Q7XJE6|MCA1_ARATH Metacaspase-1 OS=Arabidopsis thaliana GN=AMC1 PE=1 SV=1//1.00932e-170	mRNA	16.1544	15.2926	19.7657	11.4565	12.5692	10.4813	12.4442	23.1097	13.3942	13.9164	14.3478	7.92825	11.9554	14.0141	12.9181	15.9605	15.7961	11.2214	10.4534	9.01148	7.97626	11.3246	22.9287	12.3607
Ma01_t15750.1	Ma01_g15750	sp|Q8W1D5|CIPKP_ARATH CBL-interacting serine/threonine-protein kinase 25 OS=Arabidopsis thaliana GN=CIPK25 PE=2 SV=1//2.50134e-23	mRNA	0	0	0	0	0	0	0	0	0	0	0	0	0	0	0	0	0	0	0	0	0	0	0	0
Ma06_t25030.1	Ma06_g25030	sp|Q3ECP6|GDL22_ARATH GDSL esterase/lipase At1g54790 OS=Arabidopsis thaliana GN=At1g54790 PE=2 SV=1//2.55532e-180	mRNA	8.88866	11.5452	8.53356	10.6953	11.6699	15.383	8.97704	15.4578	9.25598	10.4189	10.3666	12.4813	8.70746	9.50355	9.36246	14.5036	11.1264	11.331	10.1781	11.3223	6.97995	8.88716	13.0695	8.54474
Ma04_t14220.1	Ma04_g14220	sp|Q9S9K4|ASPL2_ARATH Aspartic proteinase-like protein 2 OS=Arabidopsis thaliana GN=At1g65240 PE=1 SV=2//1.41514e-37	mRNA	0.059338	0	0.244403	0.0459636	0.0266415	0.0557916	0.0261634	0.0911216	0.0803143	0	0	0.0254653	0	0.0988819	0.0203867	0	0.028666	0	0	0.0305355	0.078015	0.0229237	0.154426	0.0710217
Ma05_t02360.4	Ma05_g02360	sp|Q9S9Q9|Y1044_ARATH BTB/POZ domain-containing protein At1g30440 OS=Arabidopsis thaliana GN=At1g30440 PE=1 SV=2//0	mRNA	0.250663	0.402808	0.102502	1.57705e-05	0.000800972	0.00677084	7.61163e-05	6.19244e-10	0.000118433	8.28908e-05	0.159323	6.92043e-05	0.543615	0.000809445	0.484132	5.37381e-05	1.42028e-05	9.3552e-06	3.71547e-05	0.339758	1.60605e-05	3.37388e-05	3.91566e-06	0.332527
Ma04_t26340.1	Ma04_g26340	sp|Q0WUQ1|BAG1_ARATH BAG family molecular chaperone regulator 1 OS=Arabidopsis thaliana GN=BAG1 PE=1 SV=1//6.71612e-80	mRNA	25.8328	70.725	41.5083	117.242	59.5561	70.8509	63.7469	13.2973	60.7121	70.7592	52.7869	146.58	100.277	40.7158	42.6985	45.4321	35.4709	43.6978	103.68	87.4157	111.201	148.986	11.164	104.23
Ma07_t02800.1	Ma07_g02800	sp|Q9LIS2|RBG4_ARATH Glycine-rich RNA-binding protein 4, mitochondrial OS=Arabidopsis thaliana GN=RBG4 PE=2 SV=1//7.52067e-41	mRNA	84.6789	123.206	173.101	94.3854	83.5876	92.6488	174.142	52.0031	143.795	117.764	153.519	122.505	95.2511	93.6562	95.2024	43.0378	42.2261	101.813	79.0043	77.4823	128.472	125.608	45.0202	116.43
Ma03_t02000.1	Ma03_g02000	sp|Q9CAH1|Y1725_ARATH Putative receptor-like protein kinase At1g72540 OS=Arabidopsis thaliana GN=At1g72540 PE=2 SV=1//9.39872e-146	mRNA	5.89637	7.40355	8.50488	11.5617	10.2912	8.99016	6.74149	6.15552	6.33678	4.79622	6.68762	7.31224	6.32466	6.69459	6.90929	7.92647	6.31053	8.44254	11.9088	9.48015	8.16565	5.35884	9.12254	8.61004
Ma03_t02000.2	Ma03_g02000	sp|Q9CAH1|Y1725_ARATH Putative receptor-like protein kinase At1g72540 OS=Arabidopsis thaliana GN=At1g72540 PE=2 SV=1//9.39872e-146	mRNA	1.21297e-05	0.167772	1.11193e-05	0.187692	1.70643e-05	0.38269	0.947746	1.03271	0.367328	0.930294	0.523056	0.661871	0.141694	8.90205e-06	0.105952	8.99345e-05	2.87208e-05	0.74302	0.250216	0.735628	1.58809e-05	0.643294	1.01168	0.573368
Ma10_t31280.5	Ma10_g31280	sp|P16577|UBC4_WHEAT Ubiquitin-conjugating enzyme E2-23 kDa OS=Triticum aestivum GN=UBC4 PE=1 SV=1//1.83722e-85	mRNA	0.00880647	0.000494411	0.541993	0.532927	4.54369e-07	5.51595e-05	0.393573	1.14772e-05	2.67685e-08	0.865112	9.77279e-05	0.778566	2.31727e-05	0.000598635	1.2918	3.73745e-25	0.0108215	0.000106866	1.17416e-07	8.92633e-05	0.000267192	0.0643088	0.941884	0.000440385
Ma10_t31280.4	Ma10_g31280	sp|P16577|UBC4_WHEAT Ubiquitin-conjugating enzyme E2-23 kDa OS=Triticum aestivum GN=UBC4 PE=1 SV=1//1.83722e-85	mRNA	1.16508e-19	1.35606e-11	6.10053e-13	1.55184e-19	3.56559e-06	5.78412e-11	5.51569e-11	1.04636e-08	1.07494e-08	8.38865e-10	2.4243e-09	3.38268e-06	1.06772e-09	1.97812e-11	6.96779e-08	3.19046e-06	2.89329e-16	8.4016e-10	4.00366e-06	3.92568e-11	4.81909e-13	2.09297e-14	1.67467e-09	2.82965e-11
Ma05_t05490.1	Ma05_g05490	sp|P9WPZ5|DAPC_MYCTU Probable N-succinyldiaminopimelate aminotransferase DapC OS=Mycobacterium tuberculosis (strain ATCC 25618 / H37Rv) GN=dapC PE=1 SV=1//7.75389e-103	mRNA	111.796	52.8253	54.5735	27.7112	71.2956	45.6274	71.3026	79.2146	48.2989	93.0465	122.735	46.4476	102.255	82.5233	95.9802	34.529	19.5066	79.7257	52.101	49.8517	39.4056	51.8493	57.5854	55.7831
Ma04_t12140.1	Ma04_g12140	sp|Q6H7U2|C3H13_ORYSJ Zinc finger CCCH domain-containing protein 13 OS=Oryza sativa subsp. japonica GN=Os02g0161200 PE=2 SV=1//7.19136e-36	mRNA	1.65876	1.4765	2.30478	3.1309	1.92878	2.2046	1.521	2.12727	2.0857	1.53295	1.20163	2.06279	1.26453	2.37815	2.89219	4.32284	5.2727	2.21979	1.91249	1.51323	2.25577	1.72613	4.19468	2.14225
Ma10_t31280.3	Ma10_g31280	sp|P16577|UBC4_WHEAT Ubiquitin-conjugating enzyme E2-23 kDa OS=Triticum aestivum GN=UBC4 PE=1 SV=1//1.83722e-85	mRNA	2.59856e-06	2.34259	0.00036889	0.0422288	1.00694	1.94591e-06	0.000126245	2.34753e-05	3.14453	4.13821e-05	0.928848	0.534243	8.00014e-06	0.47261	0.410694	0.316305	0.537565	0.88203	0.365297	1.11532	2.12284	0.40113	6.05054e-05	1.17046
Ma10_t31280.2	Ma10_g31280	sp|P16577|UBC4_WHEAT Ubiquitin-conjugating enzyme E2-23 kDa OS=Triticum aestivum GN=UBC4 PE=1 SV=1//1.83722e-85	mRNA	0.311453	3.74201e-09	1.08992e-10	0.494295	0.592631	0.536183	0.714951	1.25613	0.362052	0.878091	0.365756	4.57527e-05	0.226143	3.56123e-09	2.04545e-06	3.90838e-05	6.11578e-13	1.25161e-08	2.10003e-05	4.37561e-10	0.375772	0.511013	0.833337	5.73584e-09
Ma02_t21040.1	Ma02_g21040	sp|D4N501|DIOX2_PAPSO Probable 2-oxoglutarate/Fe(II)-dependent dioxygenase OS=Papaver somniferum GN=DIOX2 PE=2 SV=1//4.86588e-68	mRNA	12.2562	13.3251	14.7907	8.16512	8.30274	9.24441	13.0324	11.7173	13.4893	8.95924	10.2488	10.2804	10.5829	13.2153	14.7934	9.09096	8.04876	8.70386	6.63265	6.80884	8.13105	9.69291	13.1757	10.5378
Ma03_t20500.1	Ma03_g20500	sp|Q9S7I6|RPK2_ARATH LRR receptor-like serine/threonine-protein kinase RPK2 OS=Arabidopsis thaliana GN=RPK2 PE=2 SV=1//0	mRNA	1.27332	0.83105	1.73964	1.29992	1.06897	1.16972	1.70025	1.63777	1.27234	1.3139	1.10082	1.19458	0.248788	1.46466	1.25249	0.698169	0.67667	1.08712	0.826702	0.904645	1.05783	0.850647	1.70067	0.860816
Ma03_t20500.2	Ma03_g20500	sp|Q9S7I6|RPK2_ARATH LRR receptor-like serine/threonine-protein kinase RPK2 OS=Arabidopsis thaliana GN=RPK2 PE=2 SV=1//0	mRNA	0.0465183	0.267152	0.000375239	7.70434e-05	4.35722e-05	9.19412e-05	0.0790407	0.892437	0.000359275	0.000143111	0.000153824	0.000121475	0.63163	0.000924864	0.000160433	9.61669e-05	0.189621	0.000127708	0.236563	0.000386955	0.412187	0.000217271	0.506984	0.00103654
Ma07_t02810.1	Ma07_g02810	sp|O23264|SEBP1_ARATH Selenium-binding protein 1 OS=Arabidopsis thaliana GN=SBP1 PE=1 SV=1//0	mRNA	12.4194	9.928	19.5424	3.46786	11.5486	7.76822	5.45707	10.5775	12.3065	2.74079	3.93389	2.88741	5.59864	16.619	14.8052	6.51891	3.15811	13.2642	2.77926	2.38434	3.16996	4.36365	10.529	5.98067
Ma07_t22400.1	Ma07_g22400	sp|P0C897|Y3264_ARATH Putative UPF0481 protein At3g02645 OS=Arabidopsis thaliana GN=At3g02645 PE=3 SV=1//3.37046e-110	mRNA	0	0	0.0798484	0	0	0.0608041	0	0	0	0	0	0	0	0.0807727	0.0444402	0.0753529	0	0	0	0.0332238	0	0.024935	0	0
Ma04_t19640.1	Ma04_g19640	-//-	mRNA	0	0	0	0	0	0	0	0	0	0	0	0.127342	0	0	0.110462	0	0	0	0.162788	0	0	0	0	0
Ma05_t04100.1	Ma05_g04100	sp|Q94BT9|ATOX1_ARATH Copper transport protein ATX1 OS=Arabidopsis thaliana GN=ATX1 PE=1 SV=1//1.24336e-10	mRNA	0.734685	0.646086	1.20103	0.837411	1.34796	1.82719	1.13933	1.18588	1.35638	1.86107	0.572906	1.95469	0.689616	1.24044	0.666062	1.05322	0.632114	0.302397	1.22838	1.21483	1.14844	1.00379	0.194432	2.3666
Ma05_t04100.2	Ma05_g04100	sp|Q94BT9|ATOX1_ARATH Copper transport protein ATX1 OS=Arabidopsis thaliana GN=ATX1 PE=1 SV=1//1.24336e-10	mRNA	1.90476	4.57059	1.62992	4.70293	6.04233	7.17244	3.72577	2.43757	4.5168	3.93529	3.22464	7.29275	3.62953	3.30717	3.38271	4.14318	2.98081	1.84377	5.42864	5.75126	5.43144	5.28349	2.8197	7.59345
Ma03_t23570.1	Ma03_g23570	sp|Q9SB58|ZDH19_ARATH Protein S-acyltransferase 8 OS=Arabidopsis thaliana GN=PAT08 PE=1 SV=2//8.63713e-169	mRNA	8.42512	10.9697	9.74101	12.2064	9.50225	11.442	10.5581	10.0802	9.47247	12.1442	11.2718	11.5669	8.19023	9.58739	10.2884	11.003	11.0092	10.8864	9.65173	9.91144	9.37993	9.94415	9.63402	9.89682
Ma01_t00640.1	Ma01_g00640	-//-	mRNA	0.709614	3.09066	0.938742	2.19922	3.9741	2.52419	0.827574	0.675079	0.762569	1.78001	2.79114	1.23615	0.731622	1.32061	0.395712	4.38469	3.56546	3.07014	3.59964	3.60716	0.818401	0.48188	1.05664	2.62846
Ma09_t18370.1	Ma09_g18370	sp|Q9LMP1|WAK2_ARATH Wall-associated receptor kinase 2 OS=Arabidopsis thaliana GN=WAK2 PE=1 SV=1//3.02416e-178	mRNA	9.84892	5.68184	9.68265	1.69119	1.39971	1.10702	4.70422	15.548	6.75117	5.31323	2.13675	0.747008	6.48681	5.54431	5.40246	2.73473	1.98416	1.16161	1.16364	1.0796	0.489649	2.62319	10.8082	3.56995
Ma08_t30140.1	Ma08_g30140	sp|Q8AVP1|RPF1_XENLA Ribosome production factor 1 OS=Xenopus laevis GN=rpf1 PE=2 SV=1//3.56527e-87	mRNA	39.6995	32.1162	31.2357	28.29	26.725	32.8564	34.9136	24.9907	40.2945	28.8506	38.3335	25.736	37.469	42.8211	49.4736	29.5259	27.3399	34.3425	28.6857	28.3857	27.8116	35.3785	27.4554	33.9527
Ma04_t07550.2	Ma04_g07550	sp|F4IRU3|MYO12_ARATH Myosin-12 OS=Arabidopsis thaliana GN=XI-F PE=2 SV=1//0	mRNA	0.341413	0.000142316	0.0239342	0.207367	0.304889	0.261914	0.209082	1.24745	0.578018	0.299468	0.109531	0.750066	0.435207	0.323965	0.374875	0.187592	0.174848	4.40965e-05	0.00017174	0.179738	0.76	0.731535	0.52367	0.341944
Ma06_t16720.3	Ma06_g16720	sp|Q9STE8|TC753_ARATH Protein TOC75-3, chloroplastic OS=Arabidopsis thaliana GN=TOC75-3 PE=1 SV=1//0	mRNA	6.55304	8.43532	5.40619	7.98498	7.45187	6.529	7.96328	2.39094	7.222	5.64893	0.00994226	6.75113	8.0404	9.67177	9.02576	0.0598443	6.84691	11.4481	0.0921165	6.1781	8.66216	9.26194	4.42246	8.07127
Ma06_t16720.1	Ma06_g16720	sp|Q9STE8|TC753_ARATH Protein TOC75-3, chloroplastic OS=Arabidopsis thaliana GN=TOC75-3 PE=1 SV=1//0	mRNA	0.0461455	0.0668888	0.0564016	0.0528709	0.137655	0.0633854	0.0608926	0.129884	0.0470084	0.0620269	6.05891	0.0594539	0.0549095	0.0932659	0.0460563	6.33717	0.0669499	0.0654994	6.81148	0.0714825	0.0818146	0.0537005	0.0914473	0.0555644
Ma05_t28910.1	Ma05_g28910	sp|Q9FKK2|AGL62_ARATH Agamous-like MADS-box protein AGL62 OS=Arabidopsis thaliana GN=AGL62 PE=1 SV=1//1.02873e-29	mRNA	0	0	0	0	0	0	0	0	0	0	0	0	0	0	0.0752477	0	0	0	0	0	0	0	0	0
Ma04_t18770.1	Ma04_g18770	-//-	mRNA	46.4417	133.693	99.8546	20.7562	20.5748	16.1395	152.981	473.204	37.4625	114.533	53.3065	18.3363	17.6678	33.3832	19.9051	53.1629	39.1464	29.9761	23.1267	20.9527	11.6363	28.486	251.266	66.3947
Ma08_t19810.1	Ma08_g19810	sp|O22174|ERF08_ARATH Ethylene-responsive transcription factor ERF008 OS=Arabidopsis thaliana GN=ERF008 PE=2 SV=1//3.30632e-28	mRNA	1.76623	1.6075	1.45243	5.27209	3.31609	3.1258	1.09289	1.38837	1.64009	1.34453	1.53674	2.12895	5.05634	1.28097	2.12864	3.9474	3.64588	3.72283	5.05067	4.81356	4.819	4.08099	0.732075	2.4973
Ma05_t31970.1	Ma05_g31970	sp|O22932|CIPKB_ARATH CBL-interacting serine/threonine-protein kinase 11 OS=Arabidopsis thaliana GN=CIPK11 PE=1 SV=1//7.08188e-107	mRNA	4.87883	4.67683	3.25016	4.64452	4.13776	4.03831	2.83721	2.66467	3.43692	3.27488	3.11084	3.73633	5.71338	2.78795	5.07819	5.00686	4.51043	3.78822	5.97956	5.29173	5.22383	4.58102	3.36536	5.31441
Ma09_t16090.1	Ma09_g16090	sp|Q6Z5M0|IAA8_ORYSJ Auxin-responsive protein IAA8 OS=Oryza sativa subsp. japonica GN=IAA8 PE=2 SV=2//4.39701e-30	mRNA	0.39448	1.15738	0.12369	1.79443	0.471049	1.64474	1.43345	0.114043	1.80153	1.89796	2.02277	6.1587	5.46073	1.37879	0.942038	0.863286	1.42724	2.99598	1.4705	1.21729	5.53175	6.48065	0.0959376	2.21831
Ma04_t11310.1	Ma04_g11310	sp|F4K2F0|EML3_ARATH Protein EMSY-LIKE 3 OS=Arabidopsis thaliana GN=EML3 PE=1 SV=1//1.22535e-70	mRNA	0.562967	0.540894	0.537575	0.832356	0.397098	0.55285	0.279309	0.939425	0.371484	0.485201	0.571963	0.471112	0.331789	0.473408	0.461627	0.369579	0.408065	0.219801	0.327935	0.282494	0.518906	0.244925	0.79715	0.319101
Ma08_t19350.1	Ma08_g19350	sp|Q8S9Z5|DRE1F_ORYSJ Dehydration-responsive element-binding protein 1F OS=Oryza sativa subsp. japonica GN=DREB1F PE=3 SV=1//9.89494e-50	mRNA	0	0.290531	0	0.391936	0.227956	0	0	0.128527	0	0	0	0	0	0	0	0	0	0.23517	0	0	0	0.0639422	0.107957	0
Ma04_t34820.1	Ma04_g34820	sp|O04135|KNAP2_MALDO Homeobox protein knotted-1-like 2 OS=Malus domestica PE=2 SV=1//5.04509e-115	mRNA	0.106358	0	0	0	0.0718439	0	0.035163	0	0.02699	0.0732509	0.0361387	0.0342339	0.0624354	0.0667199	0.0275896	0	0	0.0376863	0.0883633	0	0.034895	0.0307788	0	0.0319398
Ma04_t40150.1	Ma04_g40150	-//-	mRNA	1.60751	2.85132	0.705203	2.02249	2.00577	1.16858	3.00067	1.09082	1.37571	1.77931	3.38878	2.96253	2.80812	1.1897	1.70898	1.65544	2.10015	1.07147	2.25066	3.4541	2.27212	2.33305	0.921658	2.08789
Ma05_t22930.5	Ma05_g22930	sp|Q84MD8|FHYRK_ARATH Bifunctional riboflavin kinase/FMN phosphatase OS=Arabidopsis thaliana GN=FHY PE=1 SV=1//3.65619e-168	mRNA	1.78263	0.232421	5.47713e-06	3.95872e-08	1.00427	1.49524e-07	5.19088e-06	2.5465e-05	1.44721	0.268716	0.57295	0.226977	1.09623e-05	0.944572	0.242481	0.372891	0.300008	1.2772e-05	2.33892e-07	1.34623e-05	7.12143e-08	1.58925	3.24171e-08	0.463982
Ma05_t31960.1	Ma05_g31960	-//-	mRNA	0	0	0	0	0	0	0.117147	0	0.0900674	0	0	0	0.102228	0	0	0	0	0	0.146344	0	0.114611	0.101637	0.343991	0.110281
Ma04_t38570.1	Ma04_g38570	sp|Q8L746|NPR3_ARATH Regulatory protein NPR3 OS=Arabidopsis thaliana GN=NPR3 PE=1 SV=1//0	mRNA	70.0311	66.0316	80.0791	53.9964	48.5614	47.7347	52.8778	81.9388	65.4577	42.6222	51.7958	40.6059	56.1639	69.8721	70.8532	68.0507	60.0045	43.0914	36.1084	42.6555	29.3935	49.8576	89.3856	44.5196
Ma10_t08310.1	Ma10_g08310	sp|Q8LC69|ATL8_ARATH RING-H2 finger protein ATL8 OS=Arabidopsis thaliana GN=ATL8 PE=2 SV=2//3.14125e-34	mRNA	0.720062	0.491333	0	0.177247	1.59516	0.434933	0.500978	6.38844	0.38465	1.61664	0.516636	0.243978	0.487703	0.143564	0.31813	0.597132	3.01822	0.643584	0.503042	0.292431	0.198345	0.394024	0.590607	0.228992
Ma07_t18150.1	Ma07_g18150	sp|Q94AP3|WAT1_ARATH Protein WALLS ARE THIN 1 OS=Arabidopsis thaliana GN=WAT1 PE=1 SV=1//0	mRNA	20.428	61.8323	16.6074	71.9538	57.0255	43.2659	27.0741	23.4132	18.6289	25.2928	47.7374	14.9628	7.61194	17.2722	17.3126	24.1212	11.4893	26.8267	20.2907	33.4482	14.9903	13.7004	12.5891	19.9351
Ma02_t24160.1	Ma02_g24160	sp|Q9C7T4|BH096_ARATH Transcription factor bHLH96 OS=Arabidopsis thaliana GN=BHLH96 PE=2 SV=1//5.7423e-40	mRNA	0.0313101	0.0404684	0	0.146295	0.0848592	0.178785	0.0828694	0	0.0317841	0.2159	6.78155e-07	0.121075	0.0734732	5.60658e-07	0.163473	0.0548202	0.0908531	0	0.156172	0.0483384	0.32879	0.181304	0	0.0754794
Ma07_t03570.1	Ma07_g03570	-//-	mRNA	0.884377	0.656982	1.51661	0.469437	1.6451	1.49507	1.16652	1.14389	0.498396	0.134494	0.408426	0.506168	0.451259	1.02798	0.987266	0.688201	0.283744	0.965517	0.808888	1.06026	1.13885	0.561521	0.570515	1.10428
Ma08_t14250.1	Ma08_g14250	sp|Q84WS8|U1125_ARATH U11/U12 small nuclear ribonucleoprotein 25 kDa protein OS=Arabidopsis thaliana GN=SNRNP25 PE=2 SV=1//3.2676e-50	mRNA	8.58467	6.77486	5.15875	4.57088	5.16852	4.56185	6.56247	5.24794	8.32827	3.78365	5.6918	5.83977	6.09614	7.08719	7.1394	7.27848	3.82785	5.41309	3.48648	4.83118	6.04944	6.53028	4.72468	5.46238
Ma08_t32460.1	Ma08_g32460	sp|B9DFG5|PTI13_ARATH PTI1-like tyrosine-protein kinase 3 OS=Arabidopsis thaliana GN=PTI13 PE=1 SV=1//0	mRNA	0.0703225	0.24136	0.0580357	0.218165	0.189745	0.298556	0.248021	0.432175	0.309331	0.290678	0.159164	0.392337	0.220387	0.0880719	0.315216	0.0820736	0.271732	0.132952	0.233795	0.361855	0.615776	0.244345	0.137205	0.562214
Ma01_t05260.1	Ma01_g05260	sp|Q9LNC4|GTE4_ARATH Transcription factor GTE4 OS=Arabidopsis thaliana GN=GTE4 PE=2 SV=1//1.64305e-84	mRNA	5.89424	2.94751	3.09684	3.65502	3.61247	3.54126	3.27844	4.8092	3.3921	3.19299	3.62631	2.98061	5.3867	4.06552	4.85407	4.29393	4.77168	3.51867	4.1664	4.2123	3.61027	3.39831	4.49798	3.58107
Ma04_t35960.1	Ma04_g35960	sp|O82427|SMT2_ORYSJ 24-methylenesterol C-methyltransferase 2 OS=Oryza sativa subsp. japonica GN=Smt2-1 PE=2 SV=2//4.8743e-109	mRNA	1.60181	4.6307	4.4826	4.86097	3.06897	3.51451	6.29427	1.06998	5.32572	4.92592	2.61647	9.20567	3.30143	2.52912	2.3768	1.01602	3.76758	3.29182	5.28695	6.12805	13.2342	5.75416	1.63061	6.01261
Ma01_t09800.1	Ma01_g09800	sp|P35339|PGLR3_MAIZE Exopolygalacturonase OS=Zea mays GN=PG2C PE=2 SV=1//1.41452e-80	mRNA	0	0	0	0	0	0	0.0736142	0	0.113095	0	0	0.071751	0	0	0	0	0.161236	0	0	0.0859645	0	0.0641678	0	0
Ma07_t04470.1	Ma07_g04470	sp|Q5BJJ6|MAT2B_DANRE Methionine adenosyltransferase 2 subunit beta OS=Danio rerio GN=mat2b PE=2 SV=1//3.13539e-23	mRNA	6.22734	6.35354	6.07807	5.7711	6.26478	5.34042	4.48562	4.82658	5.5949	4.34369	6.62682	5.22003	7.0626	6.41633	6.59847	5.75253	6.02764	6.53528	4.6234	4.58129	6.53819	6.22703	3.8247	4.7745
Ma10_t07340.1	Ma10_g07340	sp|Q42485|ZFP1_ARATH Zinc finger protein 1 OS=Arabidopsis thaliana GN=ZFP1 PE=2 SV=1//1.9858e-13	mRNA	0	0	0	0	0	0	0	0	0	0	0	0	0	0	0	0	0	0	0	0	0	0	0	0
Ma05_t16580.1	Ma05_g16580	sp|P48642|GSHRC_ORYSJ Glutathione reductase, cytosolic OS=Oryza sativa subsp. japonica GN=GRC2 PE=2 SV=2//2.52567e-40	mRNA	75.129	94.3696	72.3322	80.4164	54.379	53.392	92.4307	78.0583	87.9044	81.5497	87.3424	69.4452	68.9214	62.4597	70.1438	59.2337	63.1038	69.0236	55.7415	50.8749	73.0023	63.3858	82.2975	61.8343
Ma06_t38290.1	Ma06_g38290	-//-	mRNA	0.0579046	0	0.14376	0.101241	0	0	0.114854	0	0.117551	0.239231	0.0787497	0.0745528	0	0	0.0301114	0	0	0	0.144279	0.223443	0.037972	0.100499	0	0
Ma04_t06650.1	Ma04_g06650	-//-	mRNA	0	0	0	0	2.39066	0	0	0	0	0	0	0	1.23823	0	0	2.17537	0	1.52439	0	0	2.67351	2.50761	0	0
Ma00_t04370.1	Ma00_g04370	-//-	mRNA	0	0	0	0	0	0	0	0	0	0	0	0	0	0	0	0	0.106806	0	0	0	0	0	0	0
Ma11_t24720.1	Ma11_g24720	sp|O04086|Y1105_ARATH Probable receptor-like protein kinase At1g11050 OS=Arabidopsis thaliana GN=At1g11050 PE=2 SV=1//0	mRNA	4.29	2.78676	1.51338	4.11807	3.69798	3.48886	2.30941	1.83881	1.78709	2.83534	3.26703	2.34257	5.29959	2.85769	2.51877	3.62561	4.13883	3.44409	5.26828	6.23531	4.20665	2.55686	2.36896	3.44357
Ma09_t30710.1	Ma09_g30710	sp|O49603|CVIF2_ARATH Cell wall / vacuolar inhibitor of fructosidase 2 OS=Arabidopsis thaliana GN=C/VIF2 PE=1 SV=1//7.09445e-15	mRNA	0	0.136816	0.657987	0.244247	0.570844	0	0	0	0.207161	0.139714	0	0.1315	0.234188	0	0.343375	0.357583	0.147402	0.42978	0.168032	0.157388	0	0.116624	0	0.127776
Ma05_t13080.1	Ma05_g13080	sp|Q9M8Z7|U80A2_ARATH Sterol 3-beta-glucosyltransferase UGT80A2 OS=Arabidopsis thaliana GN=UGT80A2 PE=1 SV=1//0	mRNA	19.8819	23.7015	16.0411	16.9398	16.1207	17.9769	16.8618	16.4696	18.3421	13.3894	17.1646	17.3702	19.2819	24.4283	22.9097	14.8956	12.4807	15.4913	12.2384	12.8225	15.9455	16.8239	15.8187	16.1851
Ma03_t21640.1	Ma03_g21640	sp|Q9FJZ9|PER72_ARATH Peroxidase 72 OS=Arabidopsis thaliana GN=PER72 PE=1 SV=1//1.13143e-166	mRNA	280.874	243.568	623.129	372.15	356.912	456.549	679.331	246.263	749.785	273.179	179.994	471.438	400.117	430.121	463.202	175.481	91.8792	116.719	606.511	462.966	348.206	336.158	194.123	449.621
Ma08_t33760.1	Ma08_g33760	-//-	mRNA	0	0	0	0.0897453	0	0.036438	0	0.0592324	0.0260812	0	0	0.0330808	0.0905243	0	0	0	0	0.0364214	0.0426985	0	0	0.0594939	0	0
Ma02_t02590.1	Ma02_g02590	sp|Q5N863|BGL04_ORYSJ Beta-glucosidase 4 OS=Oryza sativa subsp. japonica GN=BGLU4 PE=2 SV=1//0	mRNA	5.73767	11.2234	11.0332	33.262	13.4683	20.4344	7.47859	6.4569	12.1776	19.2463	8.43452	20.5359	12.3091	11.3719	9.5793	10.8137	14.3578	11.2437	18.3358	14.5772	25.7183	12.2963	4.65794	9.93064
Ma05_t30440.1	Ma05_g30440	sp|C0LGQ4|MRH1_ARATH Probable LRR receptor-like serine/threonine-protein kinase MRH1 OS=Arabidopsis thaliana GN=MRH1 PE=2 SV=1//6.47889e-22	mRNA	9.00791	10.214	9.79082	10.7697	10.5327	12.0092	10.8185	26.5311	11.2948	12.404	9.60412	15.3593	15.9932	11.4182	11.2042	13.8218	8.41459	10.0875	11.6689	12.8113	15.8885	14.6669	15.9188	13.4957
Ma02_t18120.1	Ma02_g18120	sp|Q5N9X2|LAC4_ORYSJ Laccase-4 OS=Oryza sativa subsp. japonica GN=LAC4 PE=2 SV=1//0	mRNA	0	0	0.0274958	0	0	0	0.0293957	0	0	0.0612509	0	0	0	0	0	0	0	0	0	0	0	0	0	0
Ma09_t19200.1	Ma09_g19200	sp|Q6EPF0|ROC5_ORYSJ Homeobox-leucine zipper protein ROC5 OS=Oryza sativa subsp. japonica GN=ROC5 PE=2 SV=1//0	mRNA	0.186916	0.0251521	0.520114	0.102522	0.435367	0.46741	0.37751	0.0678899	0.50936	0.298565	0.0665581	0.607934	0.16256	0.293441	0.28118	0.051666	0.328085	0.111802	0.55699	0.379763	0.687338	0.376926	0.192226	0.585662
Ma06_t32940.1	Ma06_g32940	sp|A7XDQ9|B3GTK_ARATH Probable beta-1,3-galactosyltransferase 20 OS=Arabidopsis thaliana GN=B3GALT20 PE=2 SV=1//1.28857e-16	mRNA	9.74848	11.117	6.99485	11.1647	8.23888	5.95685	8.32355	6.07225	6.62411	8.1562	10.1215	7.12872	6.46762	6.40851	6.73426	9.7617	12.9647	8.78538	5.90657	8.42901	7.4644	6.68162	7.6167	6.26271
Ma11_t05610.1	Ma11_g05610	sp|Q9LPR8|SCL3_ARATH Scarecrow-like protein 3 OS=Arabidopsis thaliana GN=SCL3 PE=2 SV=1//3.37223e-180	mRNA	9.08505	11.303	9.31822	12.3679	6.2624	4.31755	8.43802	10.5591	6.00264	7.41494	8.67118	6.79159	3.34946	4.49662	4.71471	6.88094	11.2694	3.79206	9.12016	9.60814	5.1712	4.17768	7.23643	6.14057
Ma11_t07320.1	Ma11_g07320	sp|F4IB81|LYK3_ARATH LysM domain receptor-like kinase 3 OS=Arabidopsis thaliana GN=LYK3 PE=2 SV=1//3.1475e-38	mRNA	1.40372	0.694238	0.667725	0.652809	0.786005	0.70171	0.628413	0.895628	0.263065	1.10113	0.674193	0.889729	0.761843	0.297201	0.42367	0.98297	0.907576	0.612587	0.394979	1.23352	0.539207	0.700581	0.674297	0.595074
Ma10_t05600.1	Ma10_g05600	-//-	mRNA	0	0	0	0	0	0	0	0	0	0	0	0	0	0	0	0	0	0	0	0	0	0	0	0
Ma09_t29790.1	Ma09_g29790	sp|Q2R3K3|LCB2A_ORYSJ Long chain base biosynthesis protein 2a OS=Oryza sativa subsp. japonica GN=Os11g0516000 PE=2 SV=1//0	mRNA	27.1025	22.8526	18.2818	20.4484	18.3083	22.6961	17.8421	23.8013	23.9333	17.753	20.669	17.8227	31.2477	24.2323	30.0035	25.7545	21.562	18.2351	16.9387	17.4835	16.3402	22.6805	22.5041	21.4165
Ma09_t29790.2	Ma09_g29790	sp|Q2R3K3|LCB2A_ORYSJ Long chain base biosynthesis protein 2a OS=Oryza sativa subsp. japonica GN=Os11g0516000 PE=2 SV=1//0	mRNA	0.984958	1.55785	3.42592e-05	0.587926	1.60378	0.220067	0.608941	2.04845	1.05571	0.891786	1.69961	0.5858	3.10486e-05	0.810925	0.724843	1.29612	2.5451	0.637725	1.07016	1.1224	0.921149	0.442931	1.80697	0.538609
Ma05_t18000.1	Ma05_g18000	-//-	mRNA	0	0	0	0	0	0	0	0	0	0	0	0	0	0	0	0	0	0	0	0	0	0	0	0
Ma11_t20900.1	Ma11_g20900	sp|Q0D9C7|CCB22_ORYSJ Cyclin-B2-2 OS=Oryza sativa subsp. japonica GN=CYCB2-2 PE=1 SV=1//9.06514e-176	mRNA	1.13473	1.48736	3.8598	2.10594	1.52978	2.31262	2.22244	0.85475	3.56638	3.63859	1.21447	3.87711	3.02772	1.33792	2.02831	0.878651	2.75119	1.64029	3.55563	3.03185	7.62744	3.36245	1.32009	3.73897
Ma08_t07640.1	Ma08_g07640	sp|B9SCX0|CASP3_RICCO Casparian strip membrane protein 3 OS=Ricinus communis GN=RCOM_1282030 PE=3 SV=1//3.94681e-52	mRNA	0.313139	1.22677	0.786634	1.83981	5.13463	6.07169	0.0689551	3.98479	0.900382	0.932422	0.0714182	0.336003	0.790187	0.730867	0.833296	0.730967	2.86972	0.221143	1.2965	1.44935	0.272109	0.240548	1.62414	3.11414
Ma09_t14660.1	Ma09_g14660	-//-	mRNA	6.97202	2.06069	2.27443	2.1976	3.22179	2.78916	3.63956	2.59841	1.30367	4.80195	7.37339	1.88978	1.38495	1.80827	1.30495	1.78955	1.89874	1.89472	3.00525	3.31764	2.13289	2.09363	1.58483	1.69984
Ma02_t06870.1	Ma02_g06870	sp|O65493|XCP1_ARATH Xylem cysteine proteinase 1 OS=Arabidopsis thaliana GN=XCP1 PE=1 SV=1//0	mRNA	2.37557	1.80896	6.65512	7.71214	5.11609	5.9471	5.91176	4.03189	9.64471	4.27957	1.28484	5.80242	8.26345	5.0204	4.8245	2.07945	10.3717	6.13287	3.42118	4.47507	8.27992	10.5793	1.42959	10.9593
Ma05_t11900.1	Ma05_g11900	sp|Q6H7E4|TRXM1_ORYSJ Thioredoxin M1, chloroplastic OS=Oryza sativa subsp. japonica GN=Os02g0639900 PE=2 SV=1//2.64755e-58	mRNA	11.5064	20.0382	19.6035	13.0903	17.1614	17.4265	15.2025	18.8431	9.49084	12.4192	17.6167	15.357	6.48565	10.5037	9.4549	11.1302	9.50314	18.9968	12.6165	11.0241	11.9152	10.2308	14.6127	12.8626
Ma03_t28590.1	Ma03_g28590	sp|Q0J7V9|LSD1_ORYSJ Protein LSD1 OS=Oryza sativa subsp. japonica GN=LSD1 PE=2 SV=1//4.63692e-59	mRNA	0.314226	0.56054	1.9115	2.48116	1.60091	3.3288	1.24607	0.0907171	0.996633	2.32382	3.32102	5.91704	4.63907	1.43946	0.784153	0.61888	0.568715	2.05627	7.81904	6.2433	2.97966	3.03937	0.841534	3.8001
Ma10_t11410.1	Ma10_g11410	sp|Q8LA14|PSK6_ARATH Putative phytosulfokines 6 OS=Arabidopsis thaliana GN=PSK6 PE=2 SV=2//4.94503e-13	mRNA	64.9737	37.6618	17.0792	14.7798	32.8316	28.7735	17.4185	278.858	18.1423	23.1041	29.979	9.75967	18.0622	17.4594	19.8779	22.6623	264.254	28.1392	23.4522	26.9152	17.0555	20.095	86.809	22.0637
Ma04_t23650.1	Ma04_g23650	-//-	mRNA	1.76845	1.73012	1.55598	2.50039	2.2618	2.43959	2.52473	0.927352	1.86634	2.14826	1.97046	3.0658	1.73176	1.48617	1.44056	0.735663	1.85267	2.73323	3.20411	3.02763	5.0676	2.59856	0.341844	2.05133
Ma08_t28370.1	Ma08_g28370	sp|Q40194|RB11D_LOTJA Ras-related protein Rab11D OS=Lotus japonicus GN=RAB11D PE=2 SV=1//7.73151e-133	mRNA	11.2838	12.5545	9.72865	8.61619	7.23894	8.72243	12.6885	14.9306	9.94137	12.3987	12.2353	14.125	8.75119	9.40678	9.17952	6.9964	10.6084	8.86982	9.87944	9.49267	11.8891	12.625	11.7521	11.7028
Ma11_t02960.1	Ma11_g02960	sp|Q42948|DAPA_TOBAC 4-hydroxy-tetrahydrodipicolinate synthase, chloroplastic OS=Nicotiana tabacum GN=DHPS1 PE=2 SV=1//5.93452e-174	mRNA	16.5548	10.0085	13.1424	5.82359	7.91537	8.96125	9.94682	9.28297	12.6212	7.98831	10.023	5.84562	14.2573	16.0661	21.4805	7.13333	5.73566	6.47112	5.80582	5.71497	6.39202	9.35802	11.0848	9.49282
Ma09_t03520.7	Ma09_g03520	sp|Q6DW75|DGDG2_SOYBN Digalactosyldiacylglycerol synthase 2, chloroplastic OS=Glycine max GN=DGD2 PE=2 SV=1//0	mRNA	2.0709e-12	0.237514	7.02551e-06	2.34357e-12	0.276667	3.84748e-05	4.21747e-06	1.09591e-16	1.81935e-14	1.05071	7.22893e-07	0.332975	2.9865e-07	1.41565e-05	0.649222	3.03453e-05	0.156879	3.7027e-07	0.133034	9.82559e-05	0.239725	0.106172	1.97901e-07	0.109394
Ma01_t15320.1	Ma01_g15320	sp|Q8H021|GL31_ORYSJ Germin-like protein 3-1 OS=Oryza sativa subsp. japonica GN=Os03g0179000 PE=3 SV=1//8.28011e-82	mRNA	0.157113	0.203833	0.34309	0.321632	0.213454	0.451363	0.259599	0.362868	0.518249	0.324254	0	0.50573	0.551177	0.148909	0.33017	0.412587	0.227486	0.0555748	0.130317	0.181844	0.565107	0.408274	0.153006	0.570016
Ma04_t38980.1	Ma04_g38980	-//-	mRNA	127.951	131.943	89.1199	99.0011	182.784	176.368	76.0327	180.784	78.1014	110.602	96.5713	111.224	157.397	105.836	135.197	240.817	222.036	171.067	185.67	169.493	95.8895	91.3854	162.275	154.212
Ma04_t33970.1	Ma04_g33970	sp|P23922|HBP1A_WHEAT Transcription factor HBP-1a OS=Triticum aestivum PE=2 SV=1//6.64262e-46	mRNA	2.98487	3.11635	2.96896	3.52648	2.19184	4.05268	2.18335	4.28561	3.10075	2.46879	2.92826	3.08912	2.70969	3.79153	3.49549	3.5417	3.71054	4.26075	2.59903	3.38841	3.09498	3.64399	4.11355	3.10071
Ma04_t33970.2	Ma04_g33970	sp|P23922|HBP1A_WHEAT Transcription factor HBP-1a OS=Triticum aestivum PE=2 SV=1//6.64262e-46	mRNA	8.00335e-05	0.467138	0.000116111	0.000261136	0.786507	0.000190671	5.41823e-05	0.000296275	0.000720889	0.000159949	5.22692e-05	0.528718	0.184947	0.000191686	0.279211	0.94774	1.38182	6.98993e-05	0.000651831	0.000118554	0.000279215	0.000101282	7.31834e-05	0.405516
Ma08_t18980.1	Ma08_g18980	sp|Q6K6K7|UBA5_ORYSJ Ubiquitin-like modifier-activating enzyme 5 OS=Oryza sativa subsp. japonica GN=Os02g0506500 PE=2 SV=1//0	mRNA	35.0192	33.1033	38.8432	30.4105	29.609	27.3099	36.4839	39.4442	34.8468	34.8372	40.4115	28.4325	27.5944	34.4602	33.283	22.7795	25.6836	30.1867	27.2042	25.8449	30.1515	28.0925	33.6907	26.5626
Ma07_t11570.1	Ma07_g11570	sp|Q8RWQ8|FBX14_ARATH F-box protein FBX14 OS=Arabidopsis thaliana GN=FBX14 PE=2 SV=1//0	mRNA	13.446	14.2401	19.0881	21.9119	17.3281	17.7492	11.0325	10.1839	9.25596	11.4713	13.9636	16.3161	10.5063	12.8172	11.4604	15.6657	18.3785	14.4551	19.3013	19.582	16.0409	12.686	12.7212	13.7989
Ma02_t18310.1	Ma02_g18310	sp|Q6K478|CSPLQ_ORYSJ CASP-like protein 5B3 OS=Oryza sativa subsp. japonica GN=Os09g0249400 PE=2 SV=1//1.75472e-66	mRNA	18.0353	18.2941	22.505	11.8324	11.287	11.6445	17.6	25.4779	14.679	21.1651	18.9668	12.6613	10.5549	13.1314	14.1533	10.3447	10.5962	11.7843	10.0885	9.93427	11.2898	10.7874	20.4304	14.1148
Ma09_t11690.1	Ma09_g11690	sp|Q94JL3|BH112_ARATH Transcription factor bHLH112 OS=Arabidopsis thaliana GN=BHLH112 PE=2 SV=1//1.51371e-55	mRNA	1.18119	5.5019e-05	0.000631881	0.62759	0.616645	0.000149544	1.03632e-05	0.00880671	0.375384	0.18532	6.58271e-05	0.233098	0.0122131	0.321164	1.84877	0.760576	4.43306e-05	4.38687e-05	0.1346	0.000291436	6.0251e-05	0.684005	0.000273737	0.000612528
Ma05_t28990.1	Ma05_g28990	sp|Q9SV43|PLP7_ARATH Patatin-like protein 7 OS=Arabidopsis thaliana GN=PLP7 PE=2 SV=1//8.19688e-79	mRNA	1.28326	0.84931	0.233395	1.67956	0.720338	0.624698	0.0827686	0	0.127077	0.904987	0.724081	0.523878	0.146771	0.236243	0.261021	0.82192	0.22668	0.354665	0.259878	0.821249	1.68199	0.2896	0.0610149	0.678442
Ma09_t03520.4	Ma09_g03520	sp|Q6DW75|DGDG2_SOYBN Digalactosyldiacylglycerol synthase 2, chloroplastic OS=Glycine max GN=DGD2 PE=2 SV=1//0	mRNA	0.397483	1.02628	0.764397	2.09227	0.569922	1.11699	0.961151	0.244816	0.666625	7.86309e-08	0.519231	0.912098	1.10543	0.916078	0.000236694	0.319176	1.37529	0.384876	0.82231	0.232035	1.26364	0.820047	0.58218	0.752042
Ma02_t04450.1	Ma02_g04450	sp|O49432|QRT3_ARATH Polygalacturonase QRT3 OS=Arabidopsis thaliana GN=QRT3 PE=2 SV=1//1.62225e-166	mRNA	7.20978	5.3572	14.5666	11.7134	15.4784	16.579	12.0109	8.93204	8.38781	6.20529	4.77523	12.077	6.37556	7.20807	6.35937	5.38952	3.70031	4.96926	17.4318	15.6823	11.0381	8.07583	5.85921	11.3141
Ma00_t01500.1	Ma00_g01500	sp|P49107|PSAN_ARATH Photosystem I reaction center subunit N, chloroplastic OS=Arabidopsis thaliana GN=PSAN PE=1 SV=2//2.78055e-52	mRNA	4.08989	5.51272	2.94578	6.00297	7.82096	5.96871	3.74418	2.65038	5.53102	4.81388	5.53195	6.14477	2.46647	3.89783	2.32041	6.36566	8.19538	5.09257	4.29348	4.02659	6.99437	4.92065	4.60963	5.57959
Ma08_t25060.1	Ma08_g25060	sp|Q6Z8M8|SPL15_ORYSJ Squamosa promoter-binding-like protein 15 OS=Oryza sativa subsp. japonica GN=SPL15 PE=2 SV=1//3.25447e-26	mRNA	26.5218	29.0749	17.2659	28.5508	37.1525	35.6367	33.2369	52.7586	20.3886	28.7747	31.5927	26.443	22.4484	27.7602	21.534	61.6803	69.8548	47.3559	42.9524	38.4337	26.5042	26.3591	35.7067	33.3935
Ma03_t18650.1	Ma03_g18650	sp|O80437|GPAT6_ARATH Glycerol-3-phosphate 2-O-acyltransferase 6 OS=Arabidopsis thaliana GN=GPAT6 PE=1 SV=1//0	mRNA	0.107091	0.413083	0.264872	0.448203	0.808355	0.423548	0.198308	0.0986941	0.152194	0.118064	0.203493	0.386057	0.050375	0.187555	0.176891	0.374959	0.744931	0.394919	0.498581	0.330646	0.478506	0.297791	0.083596	0.410524
Ma08_t34490.1	Ma08_g34490	-//-	mRNA	0.0971039	0.041847	0	0	0	0.0461916	0.085592	5.67618	0.0328539	0.401059	0	0	0	0.0407433	0	0.056666	1.0314	0	0	0.0499575	0.0848264	0.0374291	0.820187	0.0390006
Ma04_t31700.1	Ma04_g31700	-//-	mRNA	40.8344	212.245	145.164	58.0224	166.89	250.722	175.386	161.376	78.159	192.404	119.909	293.256	60.9577	56.642	54.7863	140.65	67.7504	6.41018	183.791	186.601	14.434	36.5653	206.976	395.758
Ma03_t05380.1	Ma03_g05380	sp|H2DH22|C7A10_PANGI Cytochrome P450 CYP73A100 OS=Panax ginseng PE=2 SV=1//3.78592e-62	mRNA	13.9529	85.0088	21.1085	4.52878	4.68528	4.77246	32.9776	47.4348	11.6026	43.9777	5.57086	5.3115	4.25779	5.04315	3.51611	2.8981	8.94656	4.87905	10.7413	10.5053	4.65581	8.18258	3.43389	7.88972
Ma04_t28780.1	Ma04_g28780	-//-	mRNA	3.15165	0	0	1.11051	0	0	2.05702	1.97047	0.798615	1.03679	0	2.93009	0.787748	0	1.32435	2.71156	0	0	1.18712	1.15881	1.74294	0	0	0
Ma11_t11950.1	Ma11_g11950	sp|Q8GZ13|BEE1_ARATH Transcription factor BEE 1 OS=Arabidopsis thaliana GN=BEE1 PE=2 SV=1//3.69276e-39	mRNA	0.230217	0.35964	0.230609	0.75584	0.75292	0.665651	0.24339	1.17085	0.37383	0.949686	0.31452	0.889276	1.61185	0.350467	0.292249	0.886702	1.66613	0.911221	1.14472	0.852542	0.541023	0.0531128	1.88189	0.670615
Ma08_t30620.1	Ma08_g30620	sp|Q8L7V3|PMTQ_ARATH Probable methyltransferase PMT26 OS=Arabidopsis thaliana GN=At5g64030 PE=2 SV=1//0	mRNA	0	0.02338	0.31482	0.0211503	0	0.0769476	0.0240928	0	0.110932	0	0.098796	0.140691	0	0	0.0562303	0	0.0527957	0	0.0908877	0.0562363	0.0239556	0.0211142	0.0355552	0.021781
Ma09_t03740.1	Ma09_g03740	sp|Q9FDW1|MYB44_ARATH Transcription factor MYB44 OS=Arabidopsis thaliana GN=MYB44 PE=2 SV=1//5.21978e-48	mRNA	2.79905	1.95157	2.4493	3.68142	2.72	2.82022	1.91263	2.9457	2.12637	2.3252	2.38833	2.31494	2.53097	2.63924	2.57617	2.98551	3.17028	2.10414	2.65166	2.77594	2.12101	2.64307	3.07582	2.81586
Ma01_t18720.1	Ma01_g18720	-//-	mRNA	1.39959	1.5782	1.26499	3.46339	2.3832	2.65368	0.440056	0.927043	1.21727	0.640331	1.55645	1.37313	1.54544	1.54006	1.87182	3.0338	1.92742	1.78505	2.64412	2.36428	2.1635	2.52774	1.42367	2.53563
Ma11_t06020.4	Ma11_g06020	-//-	mRNA	7.3217	5.94419	4.18487	5.71357	5.90131	5.12515	6.03753	1.25257	6.45522	3.19439	4.89506	5.30502	6.82528	7.14822	9.16339	4.5657	5.48838	6.19345	4.64852	0.699569	6.63017	7.6088	2.87667	8.45176
Ma10_t25050.1	Ma10_g25050	-//-	mRNA	0.906899	1.32441	0.268183	2.19493	1.67747	3.18428	3.17165	0	1.62412	3.22553	1.24141	5.35789	1.3664	1.2233	1.25073	0.466985	1.62097	1.13006	4.68186	4.60896	3.33669	3.626	0.933719	5.98032
Ma03_t00110.4	Ma03_g00110	-//-	mRNA	0.00120045	5.00209e-05	1.46378	0.515097	7.85865e-05	0.000179946	0.004334	1.1549	0.000433351	0.347751	0.445748	0.00163387	0.000313944	5.5191e-05	9.97881e-05	1.36619	1.24801	0.00109547	0.173091	1.79907	0.000266478	0.513932	0.000196926	0.0029483
Ma06_t33280.1	Ma06_g33280	sp|Q9SK55|NAC42_ARATH Transcription factor JUNGBRUNNEN 1 OS=Arabidopsis thaliana GN=JUB1 PE=1 SV=1//1.97985e-77	mRNA	15.9586	12.6225	10.7061	2.03708	3.58315	1.28254	9.09746	37.7125	6.5253	16.3871	6.78578	0.326716	7.64297	11.4365	13.4791	10.119	1.67471	5.194	0.889968	0.696336	0.480828	2.77342	25.7871	4.91517
Ma05_t04220.1	Ma05_g04220	sp|Q9S9N9|CCR1_ARATH Cinnamoyl-CoA reductase 1 OS=Arabidopsis thaliana GN=CCR1 PE=1 SV=1//1.23322e-155	mRNA	0.717914	4.45595	2.53851	4.79995	4.59801	2.98143	3.86793	2.20696	1.45746	4.21193	5.38466	8.25037	3.74612	3.30264	3.4487	1.39647	4.27605	4.52236	4.68325	6.15651	11.8643	8.15639	1.34837	6.48377
Ma05_t25000.1	Ma05_g25000	sp|O80813|YC20L_ARATH Ycf20-like protein OS=Arabidopsis thaliana GN=At1g65420 PE=2 SV=2//9.44429e-28	mRNA	1.71133	2.91242	3.16043	4.09587	3.59339	4.58393	3.0896	2.77349	2.25761	2.11579	2.57937	3.37882	2.71981	2.18478	2.1967	6.39173	3.54853	4.42849	3.58774	3.34402	2.59908	3.15234	2.55052	3.06447
Ma01_t02780.1	Ma01_g02780	sp|Q7XLR1|PIP26_ORYSJ Probable aquaporin PIP2-6 OS=Oryza sativa subsp. japonica GN=PIP2-6 PE=2 SV=2//1.14327e-76	mRNA	2.05992	2.55358	2.73876	2.99322	2.40839	2.57545	2.59895	3.43881	2.48914	2.90654	2.52527	3.54438	1.85898	2.93	2.11691	3.41384	3.17305	2.50388	2.88747	2.32455	2.26552	2.94429	3.21747	3.08031
Ma03_t00710.1	Ma03_g00710	sp|Q40784|AAPC_CENCI Putative glucose-6-phosphate 1-epimerase OS=Cenchrus ciliaris PE=2 SV=1//1.61251e-179	mRNA	12.5034	13.3047	12.3066	15.1142	13.1295	17.626	9.4541	7.83419	12.5031	11.5814	12.9318	13.9995	14.613	11.6049	14.7618	13.7775	12.4498	16.0127	12.7728	12.2566	14.0991	12.3245	7.76842	13.1503
Ma06_t30330.1	Ma06_g30330	-//-	mRNA	55.2324	53.4345	48.1007	38.0943	45.1594	40.7427	40.4027	52.1861	37.3142	40.8716	42.6388	28.0285	37.8724	44.9475	40.5452	66.3935	43.2618	42.0789	41.1743	44.5891	23.3124	36.5037	50.2942	44.2068
Ma11_t25070.1	Ma11_g25070	-//-	mRNA	0.29052	0.608848	2.56207	1.91571	1.19409	2.71934	2.07233	1.07635	0.884435	1.11735	0.955647	2.1697	0.743015	1.11336	1.2444	1.72935	0.672422	1.39404	2.50003	1.25487	2.1173	1.13698	0.903515	1.9165
Ma01_t18730.1	Ma01_g18730	sp|P33083|AX6B_SOYBN Auxin-induced protein 6B OS=Glycine max PE=2 SV=1//4.6661e-13	mRNA	0.346119	0.977051	0.918377	2.51135	1.42036	1.63154	0.847068	0.5579	1.08923	0.835021	0.891609	1.93842	0.855874	1.12315	1.12104	1.60571	2.00675	1.98932	1.06525	1.3092	1.52547	1.58522	1.08121	1.48943
Ma06_t05810.1	Ma06_g05810	-//-	mRNA	19.5973	18.3844	19.7905	19.9389	21.97	22.6083	19.2453	29.731	19.1803	19.1078	20.3577	19.2426	19.6852	22.9666	20.5766	19.3282	21.1878	20.1825	20.8797	18.7941	17.3561	18.7662	23.4509	19.1998
Ma04_t07580.1	Ma04_g07580	-//-	mRNA	0.652764	0.844043	1.01477	1.02848	0.618967	0.931781	0.733599	0.451877	1.75579	1.79732	0.710898	1.93304	1.26213	0.328718	0.27255	0.171417	1.13454	0.508437	1.73408	1.41048	4.91788	0.981234	0.827009	2.24191
Ma11_t06020.2	Ma11_g06020	-//-	mRNA	0.887547	1.43892	3.67829	2.71334	2.49581	3.64024	2.2837	0.928027	2.27227	2.01492	1.83424	2.38731	1.22144	1.62218	1.32966	3.07662	3.32668	3.24379	3.05513	3.15431	3.25033	2.52903	2.17108	1.96578
Ma07_t02700.3	Ma07_g02700	-//-	mRNA	10.3613	9.17911	9.10008	11.3049	12.1204	12.717	10.4295	13.9979	8.83784	11.1039	11.3276	7.4421	11.1104	13.5971	11.8506	12.8147	15.3272	12.9823	9.10488	10.0576	8.49327	10.0574	13.9114	10.0013
Ma09_t21710.1	Ma09_g21710	-//-	mRNA	0	0	0	0.849548	0	0	1.6139	1.52605	0	0.819481	0	0	0	0	0	0	0	0.795143	0.949757	0	0	0	0	0.896967
Ma08_t16160.1	Ma08_g16160	-//-	mRNA	0	0.413291	0.397525	2.45911	3.73601	1.57096	0.54221	0.239445	0.521302	2.67186	1.56836	3.97091	0.235678	0.673834	1.4988	0.359934	0.148366	1.44189	2.3677	1.90105	2.24746	1.17377	0.397646	0.257326
Ma07_t00580.1	Ma07_g00580	sp|Q0WV13|GAUTD_ARATH Probable galacturonosyltransferase 13 OS=Arabidopsis thaliana GN=GAUT13 PE=2 SV=1//0	mRNA	0.701995	0.437593	0.605017	0.445132	0.401403	0.42061	0.647154	0.931198	0.453477	0.644945	0.461946	0.246492	0.475329	0.824884	0.658735	0.372408	0.215795	0.301724	0.459828	0.328398	0.47527	0.369717	0.871802	0.509625
Ma04_t03630.5	Ma04_g03630	sp|Q8L649|BB_ARATH E3 ubiquitin ligase BIG BROTHER OS=Arabidopsis thaliana GN=BB PE=1 SV=1//2.76496e-61	mRNA	2.37167	4.1013	5.67295	5.19025	2.86201	5.78957	4.31177	2.92713	5.3315	3.60134	2.76361	5.73442	4.19621	2.70746	4.73032	2.74293	3.07398	2.4037	4.4584	3.63568	4.95235	6.21291	1.80178	4.04844
Ma06_t20050.1	Ma06_g20050	sp|Q7F2L3|NAC48_ORYSJ NAC domain-containing protein 48 OS=Oryza sativa subsp. japonica GN=NAC48 PE=2 SV=1//4.51895e-123	mRNA	105.557	86.9349	125.51	70.1588	93.9814	68.6756	62.8579	315.527	37.034	83.5815	80.5305	44.0138	26.1635	45.3551	36.6876	96.1776	132.891	63.1861	95.7877	96.0972	35.796	29.0786	185.776	53.0638
Ma10_t14520.1	Ma10_g14520	sp|Q9MA17|SMB_ARATH Protein SOMBRERO OS=Arabidopsis thaliana GN=SMB PE=1 SV=1//8.42247e-99	mRNA	0.519698	0.521665	2.58041	1.68263	1.87417	2.29978	2.3289	0.266353	2.40313	2.66403	1.37427	3.4571	1.59205	1.4871	1.44123	0.151637	0.794685	1.88181	3.30927	3.69889	5.94523	2.2383	0	2.56956
Ma04_t24050.1	Ma04_g24050	sp|Q5W6Z9|EXB18_ORYSJ Expansin-B18 OS=Oryza sativa subsp. japonica GN=EXPB18 PE=2 SV=1//1.02186e-26	mRNA	0	0	0	0	0	0	0	0	0	0	0	0	0	0	0	0	0	0	0	0	0	0	0	0
Ma07_t02700.4	Ma07_g02700	-//-	mRNA	0.000142219	0.000299181	0.0002233	0.000150672	7.97899e-05	4.42753e-05	0.00109692	0.000580028	0.000471773	9.53794e-05	0.000445414	6.6907e-05	0.000112985	0.000110141	0.00029703	0.000193758	0.000114516	0.000998547	8.36994e-05	0.000204559	0.000211914	0.000266729	0.000166925	0.000145503
Ma09_t28100.1	Ma09_g28100	sp|Q6YUX0|ILI5_ORYSJ Transcription factor ILI5 OS=Oryza sativa subsp. japonica GN=ILI5 PE=1 SV=1//4.30186e-18	mRNA	0	0	0	0	0	0	0	0	0	0	0	0	0	0	0	0	0	0	0	0	0	0	0	0
Ma05_t16990.4	Ma05_g16990	-//-	mRNA	5.04622	5.42886	3.46454	4.72222	5.92541	5.80425	5.51734	5.97144	6.32409	4.5529	6.18746	5.70433	6.05681	5.97387	6.79786	5.89131	4.42743	5.11095	3.57904	4.46173	4.57336	6.17149	5.64743	4.46487
Ma05_t16990.5	Ma05_g16990	-//-	mRNA	1.71752e-06	1.19591e-06	2.14545e-06	1.75071e-06	9.4048e-07	1.10836e-06	3.20518e-10	2.21436e-06	1.02636e-06	3.18344e-06	1.06103e-06	1.85706e-06	1.8659e-06	1.99641e-06	2.10321e-06	2.9226e-06	1.01274e-06	9.67228e-07	1.15882e-06	5.03475e-07	8.05807e-07	2.33098e-06	2.49407e-06	5.39158e-07
Ma05_t16990.1	Ma05_g16990	-//-	mRNA	8.27274e-08	0.0907915	4.43266e-10	3.56071e-10	0.188721	3.17232e-08	0.178176	1.70875e-06	0.0909498	0.126309	0.087849	0.208552	0.284747	9.28158e-07	0.311835	9.06094e-08	8.81536e-08	1.52856e-08	1.70516e-08	6.27291e-08	2.28313e-08	0.0959134	2.08569e-08	9.11835e-08
Ma05_t16990.2	Ma05_g16990	-//-	mRNA	0.301277	0.295886	0.102601	1.38862e-09	0.204836	9.79565e-08	5.93424e-06	0.253613	0.101047	0.421359	0.284115	0.803175	1.67368e-06	0.159392	0.586248	0.178641	0.618844	4.17922e-08	0.108659	1.46586e-07	0.198907	3.19044e-08	0.501239	2.61697e-07
Ma05_t16990.3	Ma05_g16990	-//-	mRNA	1.89424	2.04467	2.99121	3.22233	2.48756	2.14407	2.81472	2.50197	2.49189	2.92553	2.55455	2.89243	1.77138	3.24112	3.64167	2.58621	2.50446	3.56842	2.56907	2.68236	3.05879	2.57336	3.61844	3.39692
Ma00_t00640.1	Ma00_g00640	-//-	mRNA	0	0	0	0	0	0	0	0	0	0	0	0	0	0	0	0	0	0	0	0	0	0	0	0
Ma10_t14530.1	Ma10_g14530	sp|Q9M365|FB331_ARATH Probable F-box protein At3g61730 OS=Arabidopsis thaliana GN=RMF PE=1 SV=2//4.76206e-114	mRNA	0	0	0.139533	0.130847	0	0	0.147966	0	0.0757373	0.256719	0.0508545	0.288233	0.0436571	0.0470967	0	0.065319	0.0540273	0	0.247639	0.17274	0.3906	0.172424	0	0.180296
Ma09_t19990.1	Ma09_g19990	-//-	mRNA	0	0.896792	0	0	0	0	0	0	0	0	0.443521	1.16891	0.328706	0	0	0.53152	0	0.413039	0.486197	0.464543	0	1.00507	0.575749	0
Ma04_t10920.1	Ma04_g10920	sp|Q9LJN8|BUB31_ARATH Mitotic checkpoint protein BUB3.1 OS=Arabidopsis thaliana GN=BUB3.1 PE=1 SV=1//0	mRNA	7.81179	9.31099	7.44384	10.9096	8.39239	10.3338	11.0329	8.54968	8.95896	10.4462	10.5134	12.9651	8.74844	8.28091	7.64854	7.34213	9.24947	9.18209	10.7261	9.85362	14.6811	10.4363	7.77842	10.7199
Ma04_t22190.2	Ma04_g22190	sp|Q9MBA3|RAD17_ARATH Cell cycle checkpoint protein RAD17 OS=Arabidopsis thaliana GN=RAD17 PE=2 SV=1//1.34492e-153	mRNA	5.89642	7.16259	4.46287	7.7926	6.49098	8.5118	3.95158	2.97655	6.34534	4.53819	5.35183	7.16831	5.63173	7.19086	8.83682	7.7585	6.65914	5.8583	5.10105	6.33677	4.77347	5.47767	5.20188	6.39223
Ma04_t22190.3	Ma04_g22190	sp|Q9MBA3|RAD17_ARATH Cell cycle checkpoint protein RAD17 OS=Arabidopsis thaliana GN=RAD17 PE=2 SV=1//1.34492e-153	mRNA	0.000357252	0.000300228	0.832557	0.515856	0.507536	2.6918e-05	0.38028	6.2267e-06	0.580397	0.3219	6.18033e-05	0.258246	1.3108	0.01261	0.00023047	0.222884	0.325264	0.444117	0.558475	0.000103815	0.526148	0.639334	0.838038	3.26095e-05
Ma04_t32830.1	Ma04_g32830	sp|Q6VAF5|TBB7_GOSHI Tubulin beta-7 chain OS=Gossypium hirsutum PE=2 SV=1//0	mRNA	0.676124	5.13378	8.25567	11.8385	4.98332	3.81909	13.0513	0.29207	6.842	7.01745	6.42332	14.3631	9.96463	5.31188	4.92825	4.17978	4.56236	12.8568	10.6805	11.9382	21.3546	21.1524	1.0721	9.99635
Ma07_t08440.2	Ma07_g08440	sp|Q03251|RBG8_ARATH Glycine-rich RNA-binding protein 8 OS=Arabidopsis thaliana GN=RBG8 PE=1 SV=1//3.73046e-14	mRNA	4.64902e-05	1.88798e-05	2.04899e-05	2.94197e-05	2.49371e-05	0.237371	1.75505e-05	4.64563e-05	2.15707e-05	1.86021e-05	2.3793e-05	0.501241	0.514154	2.67015e-05	3.74054e-05	4.21389e-05	0.570622	2.91031e-05	2.72869e-05	3.80513e-05	2.0611e-05	2.07955e-05	0.672573	0.235957
Ma07_t08440.1	Ma07_g08440	sp|Q03251|RBG8_ARATH Glycine-rich RNA-binding protein 8 OS=Arabidopsis thaliana GN=RBG8 PE=1 SV=1//3.73046e-14	mRNA	37.6649	34.1925	27.1905	28.352	25.2914	25.257	29.812	34.4353	35.7477	26.2778	31.1574	27.8774	36.992	34.7743	43.9241	31.7186	31.9944	32.0925	26.3133	26.7792	28.3306	31.8885	37.5137	33.77
Ma10_t00810.1	Ma10_g00810	sp|Q9ZVC2|NPR5_ARATH Regulatory protein NPR5 OS=Arabidopsis thaliana GN=NPR5 PE=1 SV=1//0	mRNA	2.05375	3.51805	2.44572	2.40912	2.4534	1.36511	3.17163	2.35066	2.92829	3.6923	3.11308	3.28873	2.54199	1.80606	1.94244	1.55388	1.94452	1.71157	3.34071	3.16227	2.68617	3.45319	2.28191	3.1221
Ma10_t00810.2	Ma10_g00810	sp|Q9ZVC2|NPR5_ARATH Regulatory protein NPR5 OS=Arabidopsis thaliana GN=NPR5 PE=1 SV=1//0	mRNA	0.209447	0.600507	0.000116501	0.235038	4.86629e-06	0.229209	0.902406	0.600867	0.325006	0.349846	1.22601	1.27618e-05	4.11283e-06	0.264705	0.150239	0.352025	0.180169	6.12294e-06	0.678724	0.306629	0.161624	0.258031	0.402072	1.10122
Ma11_t07550.2	Ma11_g07550	sp|Q9SMC4|DAD1_SOLLC Dolichyl-diphosphooligosaccharide--protein glycosyltransferase subunit DAD1 OS=Solanum lycopersicum GN=DAD1 PE=3 SV=1//1.08011e-68	mRNA	2.59979	4.34653	3.21948	0.429239	1.19917	1.68697	3.18668	1.66464	3.29017	4.08655	4.57474	2.15329	3.6139	2.15531	4.67686	1.51567	1.52084	2.37397	0.591566	2.3171	2.13489	1.9834	3.29408	3.74322
Ma08_t25070.2	Ma08_g25070	sp|Q9M1S3|ARP1_ARATH Probable RNA-binding protein ARP1 OS=Arabidopsis thaliana GN=ARP1 PE=2 SV=1//1.48441e-33	mRNA	4.43086	3.32818	3.89709	5.91115	9.88438	5.21779	3.41135	4.88562	4.17207	4.73584	5.03951	4.16959	7.61659	4.05299	4.60676	11.5516	11.8469	8.35892	9.6472	7.36234	2.92662	5.60313	6.15629	6.13938
Ma04_t08230.1	Ma04_g08230	sp|Q93ZR6|WSD1_ARATH O-acyltransferase WSD1 OS=Arabidopsis thaliana GN=WSD1 PE=2 SV=1//2.87624e-50	mRNA	0	0	0	0	0	0	0	0	0	0	0	0	0	0	0	0	0	0	0	0	0	0	0	0
Ma04_t19410.1	Ma04_g19410	sp|Q54BC9|DYRK2_DICDI Probable serine/threonine-protein kinase dyrk2 OS=Dictyostelium discoideum GN=dyrk2 PE=3 SV=1//4.09203e-61	mRNA	5.94459	10.2021	9.67043	7.63298	6.86423	9.73021	6.61088	5.74917	10.6261	7.38565	5.01396	10.5068	12.0707	11.3879	12.6566	9.06104	5.34933	6.53112	6.24855	6.94328	7.98215	12.1909	6.75689	9.74738
Ma00_t03520.1	Ma00_g03520	-//-	mRNA	0.186064	0	0.234882	0.0731315	0.0851228	0	0.0819164	0	0.125871	0	0.0850957	0.159725	0.576103	0.0794078	0.0666804	0.108585	0	0	0.102586	0	0	0	0	0.151855
Ma10_t25780.1	Ma10_g25780	sp|Q9XIC7|SERK2_ARATH Somatic embryogenesis receptor kinase 2 OS=Arabidopsis thaliana GN=SERK2 PE=1 SV=1//0	mRNA	18.194	18.0991	16.9421	25.9217	19.3721	23.3528	16.7265	22.6454	17.8062	20.5194	19.3532	21.1038	18.7535	14.7223	16.511	22.5907	27.0281	17.8867	21.7901	20.3053	21.2756	19.471	17.7094	19.7562
Ma08_t25070.1	Ma08_g25070	sp|Q9M1S3|ARP1_ARATH Probable RNA-binding protein ARP1 OS=Arabidopsis thaliana GN=ARP1 PE=2 SV=1//1.48441e-33	mRNA	23.9673	27.2479	21.5645	34.335	46.0109	51.8038	17.6393	31.1028	19.0268	27.1807	26.6998	30.2669	39.1607	28.1835	31.8358	75.7452	65.273	39.3907	43.103	51.6103	29.6656	26.742	35.6193	38.1805
Ma06_t10280.1	Ma06_g10280	-//-	mRNA	1.9121	2.3302	1.02727	1.30602	1.31897	0.218372	2.33023	3.41307	2.61163	3.93424	1.82187	0.66291	2.6376	2.46452	2.72023	0.386275	1.8072	0.828589	0.850233	0.907314	0.667239	0.675354	3.85312	0.996547
Ma03_t19100.1	Ma03_g19100	sp|O49255|NAC29_ARATH NAC transcription factor 29 OS=Arabidopsis thaliana GN=NAC029 PE=2 SV=1//5.4887e-79	mRNA	84.59	18.0674	26.1462	9.50041	24.3059	11.2066	14.0348	108.398	9.22603	18.4606	14.2805	3.92287	12.0686	16.6767	18.3925	25.5403	36.2515	14.9699	10.5128	11.519	4.44007	7.9517	56.9641	8.61918
Ma02_t07770.1	Ma02_g07770	-//-	mRNA	0	0	0	0	0	0	0	0	0	0	0	0	0	0	0	0	0	0	0	0	0	0	0	0
Ma04_t36320.1	Ma04_g36320	sp|Q9LMP1|WAK2_ARATH Wall-associated receptor kinase 2 OS=Arabidopsis thaliana GN=WAK2 PE=1 SV=1//1.24782e-12	mRNA	0	0	0	0	0	0	0	0	0	0	0	0	0	0	0	0	0	0	0	0	0	0	0	0
Ma04_t34430.1	Ma04_g34430	-//-	mRNA	47.2313	36.731	40.6923	34.9289	34.5238	38.6301	34.0452	85.5788	37.1029	42.7383	37.3067	28.1871	37.0793	43.6475	42.4572	45.3829	46.9065	36.761	30.241	28.8481	26.0655	29.9536	60.3299	30.1747
Ma05_t10700.1	Ma05_g10700	-//-	mRNA	38.6892	70.4917	19.386	274.694	110.845	134.333	35.5518	10.9176	42.0252	207.867	79.9207	249.886	17.7161	6.75579	5.21183	53.1275	73.1334	21.2544	53.7341	59.0774	49.8205	25.6783	17.0718	39.4864
Ma05_t27840.1	Ma05_g27840	-//-	mRNA	7.64354	7.45975	8.01531	8.09997	10.3257	9.69694	6.57264	8.95251	6.81478	6.87256	7.52314	6.93129	7.41712	8.29216	8.63934	10.3558	10.2123	8.08901	9.31667	9.82554	8.65853	7.36072	9.70078	7.48534
Ma07_t19590.1	Ma07_g19590	sp|P81898|PNAA_PRUDU Peptide-N4-(N-acetyl-beta-glucosaminyl)asparagine amidase A OS=Prunus dulcis PE=1 SV=2//2.69713e-51	mRNA	0	0	0	0	0	0	0	0.0733148	0	0.0437495	0	0.0409125	0	0	0	0	0	0	0.0527645	0	0	0	0.0619415	0.0382753
[truncated: 44,505 more rows]
