# Supplementary material for: Dual species transcript profiling during the interaction between banana (Musa acuminata) and the fungal pathogen Fusarium oxysporum f. sp. cubense
Source: BMC Genomics. 2019 Jun 24;20:519. doi: 10.1186/s12864-019-5902-z (PMC6591919; doi:10.1186/s12864-019-5902-z)
Supplement: Supplementary file 20 — Table S11. The primers for the ccp1 and Comp Foc strains construction. (XLS 28 kb) [file 12864_2019_5902_MOESM20_ESM.xls]

## Sheet: Sheet1
Additional file 20: Table S11. The primers for the ccp1 and Comp Foc strains construction
For mutation construction							For complementation construction
Primers	name	sequence					Primers	name	sequence
F1	CCP1 A Forward	GGCTGTTACGACCAGACTAAAGAGT					CR	CCP1 Reverse	aatccatcttgttcaatcatTTCCTGGTTTGTGGGCTT
F2	CCP1 A Reverse	tcatataatttctgttgaattacgtAGTGTGCTTTTTATCGAGGCGG					C1	Neo-Forward	aagcccacaaaccaggaaATGATTGAACAAGATGGATT
M1	GFP+Hyg-Forward	ccgcctcgataaaaagcacactACGTAATTCAACAGAAATTATATGA					C2	Neo-Reverse	gacgtatttcgaccacttaGAAGAACTCGTCAAGAAGG
M2	GFP+Hyg-Reverse	ccagcaccctttattacacaaccTTCCTTTGCCCTCGGACGAG					CF3	CCP1 B Forward	ccttcttgacgagttcttcTAAGTGGTCGAAATGCGAC
F3	CCP1 B Forward	ctcgtccgagggcaaaggaaGGTTGTGATTATTTGGGTGCTGG
F4	CCP1 B Reverse	CTTGTTCTCGATGTTTGTGTTGC
MF2		TGCAAGACCTGCCTGAAACCGAACT
MF3		GTCCGGCTACCTAGCAATAAGATTC
H1		TAGTGGACTGATGGAATGCAT
H2		GATAGAACCCATGGCCTATAT
F		ACGTCGGAAAAGTCCTTGAAGA
R		GTCGCTGGTGGTGCTGGTTA
